# Supplementary material for: Dynamic Contagion of Systemic Risks on Global Main Equity Markets Based on Granger Causality Networks
Source: Hindawi journal article supplement (doi:10.1155/2018/9461870), 2018-08-07
Supplement: f1 [file 9461870.f1.xls]

## Sheet: Sheet1
	HSZS	JKSE	KLSE	KS11	N225	SENSEX	SSEC	STI	SZSE	TA100	TWII	DJI	GSPTSE	IBOV	IXIC	MERV	MXX	NYA	SPX	XAX	AEX	ATX	BFX	FCHI	FTSE	GDAXI	IBEX	MIB	OMXSPI	OSEAX	RTS	SSMI	AORD	NZ50
2004-05-03	11950.6	783.41	838.21	866.11	11761.8	5584.99	1595.59	1839.23	3613.17	567.6	6029.77	10314	8257.6	19709	1938.72	1074.2	10191.5	6488.75	1117.49	1215.79	343.62	1933.47	2451.26	3705.48	4489.7	4007.65	8170.6	28232	210.65	196.4	631.11	5816.9	3388	2612.57
2004-05-04	12098.3	779.6	838.21	867.48	11761.8	5647.15	1595.59	1865.35	3613.17	575.97	6188.15	10317.2	8455.85	19988	1950.48	1077.7	10333.2	6531.24	1119.55	1229.65	343.09	1954.5	2450.43	3700.79	4547.2	3990.75	8151.6	28158	210.19	198.67	631.11	5829.7	3398.4	2622.13
2004-05-05	11950.5	758.08	846.68	867.48	11761.8	5686.19	1595.59	1879.44	3613.17	577.36	5854.23	10311	8457.29	20026	1957.26	1082.93	10114.5	6554.02	1121.53	1225.68	345.63	1950.83	2458.8	3729.38	4569.5	4022.1	8235.8	28318	212.49	201.36	636.38	5891.2	3413.7	2617.39
2004-05-06	12010.3	746.12	842.77	837.68	11571.3	5757.3	1595.59	1866.61	3613.17	576.13	5909.79	10241.3	8427.69	19190	1937.74	1054.94	9852.41	6483.09	1113.99	1219.79	338.57	1916.95	2421.65	3655.14	4516.2	3909.46	8119.3	27734	207.08	200.52	633.05	5832.4	3406.5	2610.14
2004-05-07	11910.8	743.64	835.37	838.74	11438.8	5669.58	1595.59	1843.72	3613.17	576.13	6040.26	10117.3	8274.79	18620	1917.96	1005.87	9790.99	6364.07	1098.7	1192.08	337.97	1906.27	2406.4	3653.18	4498.4	3895.64	8027	27687	206.7	196.95	601.13	5827.7	3401.2	2595.51
2004-05-10	11485.5	707.22	813.44	790.68	10884.7	5555.84	1560.22	1791.78	3476.99	555.84	5825.05	9990.02	8129.49	17604	1896.07	921.72	9440.57	6251.82	1087.12	1163.44	329.46	1841.63	2337.92	3553.35	4395.2	3784.61	7815.1	27069	199.6	190.6	601.13	5641.8	3361.9	2576.97
2004-05-11	11508.1	718.26	810.16	791.02	10907.2	5325.9	1568.06	1803.39	3492.97	560.67	5886.36	10019.5	8205.06	18537	1931.35	955.86	9648.1	6300.96	1095.45	1165	332.96	1856.17	2371.69	3606.41	4454.7	3849.84	7909	27405	203.2	193.48	576.63	5723.1	3362.9	2568.11
2004-05-12	11528.2	744.29	818.72	817.09	11153.6	5358.35	1603.77	1802.17	3596.38	559.51	5958.79	10045.2	8187.67	18326	1925.59	940.39	9690.67	6311.14	1097.28	1160.18	326.01	1848.59	2362	3564.34	4412.9	3776.24	7829	27111	199.79	194.06	589.57	5644.9	3383.9	2566.58
2004-05-13	11396.9	739.14	803.11	790.13	10825.1	5399.47	1597.57	1778.59	3575.91	558.03	5918.09	10010.7	8176.61	18402	1926.03	913.55	9784.09	6294.58	1096.44	1166.22	330.7	1847.56	2386.15	3614.24	4453.8	3824.93	7866.4	27395	204.02	196.43	595.68	5714.6	3376.2	2568.81
2004-05-14	11276.9	722.71	793.97	768.46	10849.6	5069.87	1562.69	1754.96	3489.9	558.03	5777.32	10012.9	8188.08	18611	1904.25	900.43	9786.32	6293.34	1095.7	1171.2	327.39	1798.41	2391.09	3603.26	4441.8	3803.1	7779.7	27289	202.81	197.15	596.87	5685	3366.8	2564.73
2004-05-17	10967.6	668.48	781.05	728.98	10505	4505.16	1539.96	1700.33	3460.2	549.2	5482.96	9906.91	8123.5	18122	1876.64	839.93	9605.62	6231.19	1084.1	1169.85	323	1762.61	2360.12	3553.02	4403	3754.37	7671.9	26959	199.85	197.15	616.24	5607.9	3349.4	2588.96
2004-05-18	11072.4	676.15	783.27	741.99	10711.1	4877.02	1555.44	1722.8	3487.12	552.34	5557.68	9968.51	8162.69	18556	1897.82	844.3	9730.16	6276.53	1091.49	1163.61	326.34	1780.08	2381.6	3569.14	4414.4	3789.24	7724.9	27080	201.22	196.33	619.8	5638.4	3372.5	2584.14
2004-05-19	11469.4	706.8	793.83	777.95	10967.7	5006.1	1558.29	1765.26	3503.3	562.04	5860.58	9937.71	8196.79	18688	1898.17	896.11	9767.63	6287.16	1088.68	1171.75	332.7	1833.22	2413.22	3643.32	4471.8	3872.26	7900	27526	204.7	196.56	635.21	5710	3389.8	2612.42
2004-05-20	11339.6	706.8	788.87	767.79	10862	4932.11	1549.06	1741.57	3475.29	560.9	5815.33	9937.64	8147.85	18240	1896.59	890.19	9810.78	6277.12	1089.19	1171.19	330.58	1833.22	2416.6	3609.97	4428.7	3839.32	7817.2	27435	204.7	196.56	630.97	5710	3378.9	2605.11
2004-05-21	11576	706.8	791.53	786.36	11070.2	4961.57	1558.33	1767.23	3514.22	560.9	5964.94	9966.74	8210.48	18285	1912.09	920.79	9822.39	6308.12	1093.56	1174.06	330.49	1832.34	2419.54	3607.02	4431.4	3831.84	7806.5	27373	203.69	196.42	627.12	5645.1	3394.2	2605.11
2004-05-24	11663	732.58	794.39	799.64	11101.6	5123.23	1550.35	1779.79	3499.85	569.45	5942.08	9958.43	8210.48	18669	1922.98	943.05	9891.49	6334.13	1095.41	1185.86	333.94	1847.43	2434.61	3628.82	4428.9	3867.84	7883.9	27101	204.73	197.69	632.48	5681.8	3398.4	2599.11
2004-05-25	11692.6	717.14	796.48	784.06	10962.9	5102.22	1518.05	1766.42	3436.69	569.45	5958.38	10117.6	8354.21	18860	1964.65	943.05	9991.2	6429.32	1113.05	1195.88	331.54	1828.37	2404.53	3610.53	4418	3828.07	7841.5	26989	203.08	199.32	619.08	5646.9	3393.7	2575.9
2004-05-26	11692.6	718.01	799.25	784.06	11152.1	5081.95	1524.44	1776.7	3469.2	569.45	6027.27	10109.9	8318.98	19069	1976.15	942.27	10062.6	6435.14	1114.94	1193.33	334.52	1843.77	2422.58	3659.92	4438.3	3867.52	7926.1	27267	203.74	200.89	629.99	5671.7	3422.3	2579.08
2004-05-27	11983.9	728.31	811.74	802.46	11166	5058.55	1557.18	1778.55	3561.86	571.36	6033.05	10205.2	8343.6	19734	1984.5	957.17	10153.6	6492.3	1121.28	1200.01	338.17	1855.65	2441.75	3679.37	4453.6	3913.33	7965.4	27378	205.54	201.14	613.52	5705.8	3441.2	2587.6
2004-05-28	12116.9	733.99	808.44	816.51	11309.6	4835.39	1548.72	1787.18	3548.69	571.36	6137.26	10188.5	8347.08	19667	1986.74	970.42	10028.4	6484.72	1120.68	1198.11	336.95	1879.78	2412.31	3652.03	4430.7	3902.72	7951.6	27344	206.17	201.06	583.17	5627.1	3447.3	2589.16
2004-05-31	12198.2	732.52	810.67	803.84	11236.4	4759.62	1555.91	1788.66	3577.65	569.87	5977.84	10188.5	8417.32	19545	1986.74	952.62	10036.3	6484.72	1120.68	1198.11	337.19	1879.78	2415.43	3669.63	4430.7	3921.41	7959.3	27355	206.17	201.06	581.07	5627.1	3456.9	2595.73
2004-06-01	12105.5	731.2	812.27	815.77	11296.8	4835.12	1579.66	1791.97	3632.46	572.48	5986.2	10202.6	8418.37	19546	1990.77	975.62	10043.3	6487.25	1121.2	1203.1	331.88	1838.82	2399.88	3624.47	4422.7	3864.18	7848.4	27231	204.3	202.66	557.45	5589.5	3454.6	2597.75
2004-06-02	12201.8	719.04	806.36	804.39	11242.3	4923.69	1567.07	1791.97	3597.3	576.21	5875.67	10263	8374.83	19717	1988.98	977.37	9981.89	6506.34	1124.99	1202.82	334.48	1843.25	2414.7	3646.23	4422.8	3888.31	7908.7	27329	205.92	203.1	568.2	5631.7	3473.1	2597.96
2004-06-03	11929.9	719.04	798.58	770.06	11027	4817.99	1543.53	1780.88	3533.87	576.18	5671.45	10195.9	8329.12	19400	1960.26	952.2	9907.59	6456.71	1116.64	1195.14	336.57	1849.75	2442.11	3654.37	4435.4	3917.08	7901.9	27315	207.01	201.89	570.61	5660.5	3465.6	2613.59
2004-06-04	12022.6	697.94	802.82	780.74	11128	4889	1542.09	1791.7	3522.89	576.18	5724.89	10242.8	8348.74	19819	1978.62	928.68	10057.6	6503.88	1122.5	1201.19	339.08	1867.7	2461.27	3698.87	4454.4	3961.93	8010.7	27532	209.41	202.14	567.49	5688.4	3466.6	2612.4
2004-06-07	12326.9	700.78	815.73	809.45	11439.9	4938.15	1517.15	1818	3479.41	578.08	5935.82	10391.1	8412.75	20447	2020.62	934.05	10368.6	6610.89	1140.42	1210.51	342.42	1882.12	2474.67	3722.23	4491.6	4017.81	8109	27781	211.6	203.7	576.27	5744.2	3482.3	2612.4
2004-06-08	12344.2	703.58	817.39	809.31	11521.9	4962.63	1493.81	1820.14	3440.72	576.34	5986.76	10432.5	8412	20284	2023.53	932.95	10336.1	6603.42	1142.18	1208.78	342.73	1883.74	2475.1	3723.46	4504.8	4018.95	8103.7	27841	211.27	204.95	586.08	5733.5	3482.4	2620.83
2004-06-09	12339.9	709.75	818.4	794.53	11449.7	4963.75	1468.07	1820.12	3387.17	575.72	5965.7	10368.4	8317.12	19865	1990.61	904.22	10219	6525.52	1131.33	1195.48	341.74	1869.8	2470.12	3699.29	4489.5	3997.76	8075.2	27783	210.17	204.43	589.7	5715.2	3466.6	2611.21
2004-06-10	12422.9	706.84	823.91	782.3	11576	4944.64	1468.34	1828.79	3401.38	576.67	5867.51	10410.1	8345.49	19865	1999.87	884.95	10230.5	6556.97	1136.47	1199.29	342.11	1869.8	2472.26	3711.38	4486.1	4021.64	8097.7	27955	209.91	204.49	571.67	5680.5	3469.1	2603.8
2004-06-11	12396.4	704.12	824.32	751.53	11526.8	4832.71	1472.07	1823.14	3381.69	576.67	5735.07	10410.1	8366.62	19834	1999.87	885.41	10214.5	6556.97	1136.47	1199.29	341.36	1878.61	2450.16	3699.38	4484	4014.56	8062.3	27933	210.24	205.65	566.83	5690	3478.1	2603.8
2004-06-14	12076.6	696.34	817.61	738.79	11491.7	4746.01	1438.74	1814.06	3302.53	575.93	5574.08	10334.7	8292.31	19488	1969.99	855.02	10093	6465.21	1125.29	1189.36	337.29	1879.36	2436.99	3647.1	4433.2	3948.65	7965.2	27729	207.97	204.34	566.83	5633.6	3478.1	2624.02
2004-06-15	12050.7	707.41	810.03	752.1	11387.7	4814.85	1463.78	1820.5	3366.33	575.37	5646.49	10380.4	8390.24	20047	1995.6	886.74	10220.7	6526.03	1132.01	1200.93	339.81	1886.38	2446.5	3683.43	4458.6	3987.3	8028.6	28053	208.98	204.82	542.57	5671.7	3467.6	2618.29
2004-06-16	12161.8	707.89	818.16	752.34	11641.7	4788.8	1475.42	1831.31	3396.89	576.81	5560.16	10379.6	8427.87	20460	1998.23	909.3	10151.6	6535.37	1133.56	1206.1	342.12	1914.2	2450.77	3714.5	4491.1	4003.24	8069.3	28162	209.83	205.56	533.26	5710	3484.6	2622.13
2004-06-17	12082.9	700.14	821.3	760.09	11607.9	4839.88	1445.5	1814.15	3306.04	578.7	5664.35	10377.5	8497.56	20335	1983.67	909.69	10175.3	6546.01	1132.05	1211.64	342.55	1937.53	2458.54	3718.08	4493.3	3985.46	8102.9	28242	209.16	208.04	587.1	5706.2	3506.8	2625.6
2004-06-18	11855.5	692.72	821.93	741.73	11382.1	4769.99	1427.3	1791.62	3263.7	578.7	5569.29	10416.4	8468.01	20333	1986.73	951.17	10224.4	6566.58	1135.02	1219.6	343.38	1952.49	2471.82	3740.9	4505.8	3999.79	8109.2	28297	208.56	210.94	600.86	5693.9	3523.3	2625.6
2004-06-21	11845.6	689.61	825.56	749.3	11600.2	4738.62	1433.47	1787.15	3290.96	589.06	5556.54	10371.5	8472.18	20293	1974.38	951.17	10187.9	6545.16	1130.3	1224.6	343.87	1976.54	2464.84	3740.28	4502.2	3989.31	8129.3	28054	208.31	209.79	618.36	5716.5	3547.4	2638.1
2004-06-22	11845.6	691.09	818.47	746.48	11581.3	4735.86	1450.68	1785.93	3326.52	590.07	5556.54	10395.1	8517.86	20199	1994.15	955.03	10140.2	6553.81	1134.41	1231.71	339.62	1944.51	2454.6	3700.32	4468.5	3928.39	8056.5	27892	207.47	208.35	609.27	5658.4	3533.9	2656.26
2004-06-23	11849.8	699.76	822.09	738.93	11580.6	4644	1440.73	1794.65	3299.14	590.45	5729.3	10479.6	8575.41	20836	2020.98	960.85	10137.9	6602.34	1144.06	1255.85	340.37	1953.35	2450.94	3720.14	4486.7	3945.1	8107.2	27996	210.72	211.24	603.13	5653.9	3545.3	2667.39
2004-06-24	12163.7	709.35	826.8	763.13	11744.1	4708.55	1427.75	1799.48	3290.2	593.65	5779.09	10443.8	8530.77	20708	2015.57	938.66	10182.5	6597.56	1140.65	1250.58	343.14	1964.13	2458.84	3755.75	4503.2	4007.05	8162.6	28149	212.87	212.27	601.09	5674.5	3524.8	2667.39
2004-06-25	12185.5	720.23	824.23	779.03	11780.4	4756.39	1401.11	1805.54	3255.6	593.65	5802.55	10371.8	8497.77	20750	2025.47	931.76	10128.8	6571.2	1134.43	1249.98	343.43	1962.07	2452.07	3742.38	4494.1	4013.35	8120.5	28194	212.87	213.68	599.97	5681.5	3523	2666.75
2004-06-28	12194.6	720.54	822.22	770.95	11884.1	4837.6	1385.18	1816.42	3230.78	596.95	5709.84	10357.1	8468.87	20351	2019.82	922.6	10137	6571.58	1133.35	1247.76	347.15	1981.82	2460.68	3771.58	4518.7	4069.35	8184.4	28310	213.48	212.99	589.9	5706.3	3518.5	2661.11
2004-06-29	12116.3	722.29	823.28	778.72	11860.8	4841.38	1408.69	1830.24	3288.66	593.05	5741.52	10413.4	8498.52	20801	2034.93	933.49	10137.4	6574.52	1136.2	1244.27	346.35	1991.72	2464.21	3756.48	4512.4	4069.73	8131.2	28234	212.93	213.35	576.23	5688.3	3517.5	2669.64
2004-06-30	12285.8	732.4	819.86	785.79	11858.9	4795.46	1399.16	1838	3275.85	596.24	5839.44	10435.5	8545.58	21149	2047.79	945.45	10281.8	6602.99	1140.84	1249.82	345.13	1989.4	2470.66	3732.99	4464.1	4052.73	8078.3	28092	212.97	213.65	583.32	5619.1	3530.3	2696.07
2004-07-01	12285.8	729.81	828.1	778.03	11896	4874.05	1441.07	1844.18	3384.89	601.33	5836.91	10334.2	8545.58	21349	2015.55	951.18	10261	6544.76	1128.94	1245.93	345.87	1992.56	2469.09	3716.2	4424.7	4035.02	8085.3	27940	213.01	215.01	585.15	5625.7	3534	2692.21
2004-07-02	12220.1	745.03	830.68	755.42	11721.5	4870.58	1441.19	1839.33	3391.76	601.33	5746.7	10282.8	8487.31	21568	2006.66	967.68	10240.8	6542.36	1125.38	1259.96	341.83	2015.31	2459.34	3685.06	4407.4	3998.77	8034.6	27909	212.18	212.33	566.45	5606.8	3531.5	2693.4
2004-07-05	12252.1	745.03	843.61	756.72	11541.7	4843.77	1444.59	1862.75	3381.21	602.46	5659.78	10282.8	8486	21670	2006.66	979.93	10222.5	6542.36	1125.38	1259.96	339.84	2003.31	2450.44	3688.18	4403.3	3995.73	8060.3	27941	211.21	213.42	560.1	5588.2	3534.4	2692.64
2004-07-06	12284.1	768.26	851.8	758.47	11475.3	4928.59	1450.5	1874.57	3398.19	599.31	5733.57	10219.3	8484.74	21670	1963.43	969.92	10222.5	6497.53	1116.21	1256.18	335.92	1987.44	2435.19	3660.68	4370.7	3944.88	8022.8	27795	209.33	213.79	564.86	5549.9	3551.5	2687.6
2004-07-07	12320.3	771.66	855.08	761.88	11384.9	4955.97	1438.4	1873.75	3364.87	597.22	5727.78	10240.3	8481.94	21171	1966.08	969.95	10042	6518.71	1118.33	1257.57	334.79	1998.11	2451.76	3660.4	4358.4	3930.58	8063.8	27751	208.93	210.54	572.34	5541.4	3559.9	2700.71
2004-07-08	12119.8	759.74	851.77	743.64	11322.2	4843.84	1439.78	1860.5	3369.69	596.28	5713.39	10171.6	8420.37	20887	1935.32	985.54	9975.12	6473.58	1109.11	1255.05	335.56	2005.71	2443.89	3670.41	4381.1	3934.48	8085	27844	209.02	210.91	573.9	5578.7	3562.8	2693.54
2004-07-09	12202.3	761.14	854.06	747.46	11423.5	4945.48	1430.65	1862.03	3345.85	596.28	5777.72	10213.2	8473.18	20887	1946.33	985.54	10042.3	6500.4	1112.81	1261.16	335.94	2029.94	2456.26	3668.48	4393.2	3924.49	8047.5	27929	207.64	211.7	567.98	5548.1	3558.9	2691.01
2004-07-12	12191	757.58	851.13	746.27	11582.3	4944.54	1397.15	1870.89	3277.31	592.59	5758.74	10238.2	8422.23	21532	1936.92	986.54	10090.4	6503.78	1114.35	1259.68	333.53	2019.84	2447.27	3651.63	4360	3893.24	8053.6	27728	205.12	210.47	574.32	5532.7	3554	2689.88
2004-07-13	12078.3	756.58	851.82	750.95	11608.6	4898.99	1399.46	1878.15	3298.01	592.08	5685.57	10247.6	8452.6	21677	1931.66	950.56	10033.9	6504.6	1115.14	1250.05	333.8	2030.54	2469.11	3656.18	4357.7	3903.88	8076.5	27772	207.08	211.01	590.28	5531.3	3554.9	2681.66
2004-07-14	11932.8	744.32	845.02	736.57	11356.6	4848.3	1403.76	1870.9	3296.37	585.93	5623.65	10208.8	8458.28	21673	1914.88	972.36	9843.02	6488.8	1111.47	1256.87	332.72	2007.89	2465.14	3648.75	4372.6	3898.84	8029.6	27645	207.98	210	588.67	5548.3	3524.1	2678.94
2004-07-15	11939.4	745.34	838.6	732.74	11409.1	4888.19	1421.54	1867.56	3341.81	588.34	5542.8	10163.2	8397.31	22065	1912.71	962.51	9875.57	6457.12	1106.69	1250.5	328.63	2003.11	2451.44	3610.55	4340.7	3847.19	7983.1	27434	205.14	210.65	593.74	5477.9	3527.7	2693.47
2004-07-16	12059.2	756.09	842.65	739.39	11436	4951.17	1456.13	1871.47	3442.07	588.34	5502.14	10139.8	8350.45	22447	1883.15	961.61	9923.92	6456.02	1101.39	1272.96	328.77	2020.76	2453.74	3610.4	4339.2	3845.93	8010.9	27436	206.05	210.64	592.28	5461.2	3533.5	2709.81
2004-07-19	12167	754.27	843.15	750.4	11436	4975.4	1457.54	1881.77	3444.34	587.64	5489.1	10094.1	8414.79	22102	1883.83	953.66	9921.16	6446.66	1100.9	1263.45	326.68	2008.81	2432.54	3592.63	4321.1	3812.63	7981.4	27329	204.04	208.4	604.13	5429.7	3535.1	2707.16
2004-07-20	12123.6	756.67	838.64	737	11258.4	4957.88	1447.94	1865.26	3417.28	588.27	5325.68	10149.1	8418.54	22361	1917.07	989.36	10025.1	6473.03	1108.67	1261.48	328.06	2020.75	2444.85	3607.39	4339.4	3837.6	7990	27381	204.48	208.23	585.1	5498.2	3507.1	2707.16
2004-07-21	12395.1	761.24	840.88	753.32	11433.9	4993.76	1448.04	1873.17	3414.82	591.08	5409.13	10046.1	8454.15	21810	1874.37	981.91	9987.06	6390.21	1093.88	1248.15	331.37	2007.53	2461.09	3637.47	4377.3	3877.48	8031.4	27499	208.73	209.6	575.7	5561.7	3528.1	2743.67
2004-07-22	12320.2	761.52	839.37	742.63	11285	5054.29	1407.44	1862.97	3338.91	583.86	5387.96	10050.3	8398.04	21730	1889.06	979.22	9987.33	6390.63	1096.84	1244.31	324.97	1972.38	2422.85	3572.84	4306.3	3801.05	7925.2	27136	204.61	207.86	553.79	5476.9	3505.5	2757.64
2004-07-23	12353	766.37	838.2	737.51	11187.3	5073.34	1407.4	1850.26	3334.69	583.86	5373.85	9962.22	8383.31	21591	1849.09	975.42	9907.67	6324.1	1086.2	1233.47	324.68	1995.06	2415.52	3567.29	4326.3	3797.33	7848.8	27128	204.65	208.17	565.77	5482	3495.7	2741.55
2004-07-26	12319.8	761.8	838.49	736.21	11159.5	5118.17	1387.67	1855.98	3297.95	578.99	5331.71	9961.92	8314.54	21318	1839.02	953.13	9921.4	6297.64	1084.07	1217.9	320.72	1991.8	2406.23	3532.61	4287	3752.59	7740.9	26886	202.89	207.35	555.13	5444	3495.6	2741.41
2004-07-27	12301.3	759.28	836.15	738.51	11031.5	5075.88	1384.13	1869.08	3275.02	578.99	5398.61	10085.1	8294.37	21737	1869.1	939.92	10120	6347.6	1094.83	1221.51	324.72	2018.5	2438.02	3565.1	4324.9	3814.08	7842.3	27078	205.31	207.24	550.56	5501.9	3500.1	2755.94
2004-07-28	12320.3	760.2	838.64	744.42	11204.4	5070.29	1388.81	1875.25	3303.24	571.36	5383.57	10117.1	8356.32	22168	1858.26	949.15	10090.6	6357.77	1095.42	1226.61	324.32	2040.13	2440.1	3575.92	4356.2	3807.21	7809.1	27061	205.97	208.58	518.15	5514.7	3510.3	2768.17
2004-07-29	12183.1	760.97	833.5	730.61	11116.8	5120.45	1407.33	1892.11	3329.12	570.87	5349.66	10129.2	8443.19	22228	1881.06	954.93	10060.3	6394.07	1100.43	1229.6	330.71	2026.15	2478.11	3643.79	4418.7	3889.68	7872.8	27397	207.65	211.33	526.64	5553.4	3512.6	2774.61
2004-07-30	12238	756.98	833.98	735.34	11325.8	5170.32	1386.2	1891.71	3283.37	570.87	5420.57	10139.7	8458.07	22337	1887.36	966.1	10116.4	6403.15	1101.72	1240.34	329.91	2031.66	2465.13	3647.1	4413.1	3895.61	7919.3	27538	208.62	212.01	540.27	5547.2	3546.1	2788.01
2004-08-02	12201.4	749.46	827.49	719.59	11222.2	5202.53	1373.22	1887.41	3257.66	562.97	5350.4	10179.2	8458.07	22448	1892.09	962.41	10173.9	6426.4	1106.62	1249.05	325.87	2020.91	2470.75	3623.79	4415.7	3862.71	7869	27429	207.42	213.13	545.81	5537.8	3554.5	2776.65
2004-08-03	12357.1	757.29	825.53	726.44	11140.6	5194.63	1366.26	1911.8	3228	560.24	5367.22	10120.2	8464.14	22373	1859.42	969.09	10205.6	6402.71	1099.69	1251.05	326.93	2030.56	2495.56	3650.8	4429.7	3877.32	7894.2	27507	207.52	215.26	545.52	5588.6	3565.3	2786.25
2004-08-04	12280.3	758.3	824.88	729.41	11010	5169.07	1404.51	1903.85	3318.5	553.98	5316.87	10126.5	8362.95	22178	1855.06	983.8	10075.8	6385.06	1098.63	1237.69	323.39	2027.64	2486.4	3607.58	4408.1	3823.74	7812.3	27250	206.14	214.03	547.1	5518.9	3555.5	2785.29
2004-08-05	12491.9	762.01	824.37	743.35	11060.9	5252.78	1389.04	1935.7	3268.33	560.57	5427.61	9963.03	8267.87	21330	1821.63	973.77	10066.9	6295.1	1080.7	1224.47	325.85	2031.76	2511.38	3622.98	4413.4	3829.03	7836.5	27126	207.35	211.79	548.2	5515.2	3546.2	2794.6
2004-08-06	12478.7	753.93	820.1	733.95	10972.6	5196.99	1390.46	1922.75	3274.43	560.57	5399.16	9815.33	8176.68	21653	1776.89	964.11	9866.13	6225.83	1063.97	1221.28	315.74	1995.35	2480.52	3528.64	4337.9	3727.74	7681	26652	202.95	207.35	539.05	5403.1	3538.9	2764.22
2004-08-09	12467.4	750.04	816.81	742.13	10908.7	5233.21	1395.85	1922.75	3298.3	552.98	5399.45	9814.66	8183.44	21261	1774.64	963.7	9814.06	6227.55	1065.22	1217.94	313.08	1978.53	2452.16	3497.3	4314.4	3690.33	7633.6	26419	200.91	205.38	550.46	5358.6	3519.5	2756.76
2004-08-10	12408	752.44	820.78	748.62	10953.5	5252.05	1400.77	1901.41	3304.76	548.9	5393.73	9944.67	8231.26	21737	1808.7	967.62	9910.84	6295.11	1079.04	1218.17	316.24	1992.61	2475.27	3533.06	4350.9	3720.64	7654.7	26581	202.96	207.47	544.48	5383	3509.2	2755.05
2004-08-11	12343.1	763.95	821.45	753.06	11049.5	5175.16	1384.96	1896.19	3270.68	540.67	5367.34	9938.32	8168.24	21570	1782.42	957.02	9849.93	6278.6	1075.79	1211.55	312.86	1989.98	2461.89	3502.95	4312.2	3678.91	7607.7	26310	199.8	205.42	537.05	5369.3	3520.1	2755.05
2004-08-12	12413.4	758.18	819.85	766.7	11028.1	5139.77	1368.2	1888.18	3227.52	534.77	5368.02	9814.59	8132.34	21570	1752.49	954.87	9812.66	6217.06	1063.23	1202.66	311.57	2006.29	2467.93	3494.23	4328.1	3658.11	7624.2	26249	198.84	206.93	539.01	5356	3495.7	2767.85
2004-08-13	12359.8	755.92	815.62	776.02	10757.2	5102.92	1368.45	1872.88	3245.81	534.77	5389.93	9825.35	8172.63	21401	1757.22	934.03	9790.62	6234.84	1064.8	1210.01	310.68	2011.72	2453.52	3484.84	4301.5	3646.99	7578.3	26198	198.34	208.39	555.37	5309.8	3489.1	2757.72
2004-08-16	12219.8	751.95	809.12	773.85	10687.8	5102.37	1354.51	1877.6	3217.07	526.97	5352.01	9954.55	8241.49	21764	1782.84	934.03	9899.52	6315.95	1079.34	1215.36	314.37	2047	2471.98	3516.68	4350.2	3699.11	7578.3	26450	200.16	209.52	558.64	5354.2	3480.7	2747.49
2004-08-17	12256.1	751.95	808.51	771.03	10726	5102.94	1360.2	1880.52	3226.62	536.8	5342.49	9972.83	8232.18	22061	1795.25	938.03	9997.03	6320.25	1081.71	1208.65	315.72	2031.34	2479.17	3533.13	4358.7	3705.73	7670.7	26447	201.04	211.11	560.67	5378.4	3495.4	2748.56
2004-08-18	12228.5	754.25	809.56	773.19	10774.3	5038.28	1358.22	1890.68	3233.85	532.95	5427.75	10083.1	8222.99	22779	1831.37	952.78	10080.5	6386.73	1095.17	1216.66	316.69	2042.73	2477.17	3541.48	4355.2	3726.5	7709.1	26482	202.5	210.11	546.11	5325.2	3488.6	2733.85
2004-08-19	12396.7	753.69	810.15	788.53	10903.5	5123.65	1340.45	1907.05	3190.34	540.43	5602.99	10040.8	8293.94	22935	1819.89	944.7	10099.6	6372.63	1091.23	1221.95	317.29	1960.48	2491.19	3544.42	4362.6	3722.99	7734.5	26508	202.88	211.59	547.69	5351.9	3498.3	2738.05
2004-08-20	12376.9	750.47	808.47	787.64	10889.1	5064.66	1341.74	1894.93	3185.72	540.43	5622.86	10110.1	8335.62	23196	1838.02	937.26	10143.4	6414.67	1098.35	1225.99	316.5	1946.45	2490.56	3538.02	4369.2	3712.61	7707.1	26421	202.41	212.87	551.69	5344.2	3507.8	2734.4
2004-08-23	12431.8	749.37	808.61	787.65	10961	5033.69	1325.41	1901.23	3151.74	550.35	5660.97	10073	8315.46	22852	1838.7	936.47	10169.2	6385.44	1095.68	1219.85	321.72	1948.77	2512.74	3589.69	4405.3	3772.14	7788.9	26718	206.26	214.55	548.52	5394.3	3535.1	2737.36
2004-08-24	12646.5	738.87	804.89	792.34	10985.3	5067.39	1344.63	1905.4	3182.53	553.8	5660.97	10098.6	8316.4	22870	1836.89	940.02	10222.7	6382.51	1096.19	1213.73	321.55	1964.58	2510.6	3594.38	4407.5	3771	7792.7	26730	205.81	213.85	557.34	5380.2	3539.7	2737.31
2004-08-25	12793	731.72	807.56	803.97	11130	5088.56	1339.78	1917.09	3165.07	552.03	5660.97	10181.7	8371.37	23058	1860.72	942.03	10237.9	6431.79	1104.96	1217.33	322.08	1981.55	2530.03	3595.26	4411.6	3788.88	7784.1	26805	207.27	214.1	558.49	5374.8	3530.4	2739.98
2004-08-26	12784.4	735.25	818.53	810.21	11129.3	5135.45	1334.42	1919.1	3156.98	557.59	5813.39	10173.4	8331.34	22582	1852.92	940.2	10198.4	6439.8	1105.09	1221.73	324.5	1988.4	2550.63	3629.84	4453.9	3832.28	7838.2	26923	208.65	214.74	563.52	5432.4	3537.9	2740.59
2004-08-27	12818.4	746.76	821.49	810.3	11209.6	5117.01	1320.61	1915.9	3115.25	557.59	5797.71	10195	8334.29	22597	1862.09	950.55	10225.1	6455.52	1107.77	1229.5	326.31	2007.56	2562.48	3649.24	4490.1	3851.18	7882.3	27084	209.11	215.68	575.1	5463.9	3568.7	2735.91
2004-08-30	12877.8	753.03	827.98	805.19	11184.5	5186.45	1319.41	1905.45	3122.09	558.12	5788.94	10122.5	8309.04	22869	1836.49	962.62	10199.5	6414.54	1099.15	1224.33	325.73	1993.53	2562.56	3636.71	4490.1	3838.85	7881.7	27009	208.62	216.16	575.28	5448.8	3562.4	2747.34
2004-08-31	12850.3	754.7	827.98	803.57	11081.8	5192.08	1342.06	1918.34	3175.79	551.09	5765.54	10173.9	8377.03	22803	1838.1	952.14	10264.3	6454.22	1104.24	1232.41	323.12	1993.02	2558.08	3594.28	4459.3	3785.21	7869.5	26913	207.62	214.92	584.65	5421.7	3561.9	2747.34
2004-09-01	13023.9	775.1	828.38	817.36	11127.4	5210.85	1321.46	1929.48	3127.06	547.33	5858.14	10168.5	8410.12	22513	1850.41	962.66	10329.8	6469.86	1105.91	1237.43	325.27	2001.74	2584.53	3613.23	4502	3817.62	7938.9	27171	209.76	216.13	583.67	5468	3581.6	2747.05
2004-09-02	12999.1	780.27	842.04	823.83	11152.8	5198.72	1327.93	1940.86	3141.73	549.48	5852.85	10290.3	8388.86	22688	1873.43	976.23	10422.6	6535.05	1118.31	1243.1	326.85	2009.43	2592.89	3633.38	4518.6	3833.45	7983.9	27377	210.09	219.6	587.01	5449.8	3594.7	2733.82
2004-09-03	12948.1	786.49	841.9	820.69	11022.5	5218.46	1327.12	1936.55	3126.2	549.48	5761.14	10260.2	8344.42	22415	1844.48	986.55	10335	6510.44	1113.63	1243.17	328.75	2017.68	2621.27	3665.94	4550.8	3866.99	8061.1	27666	210.91	220.62	589.24	5502.5	3584.4	2733.82
2004-09-06	13104.3	784.79	838.77	824.21	11244.4	5246.23	1321.47	1937.43	3125.03	552.21	5775.99	10260.2	8344.42	22502	1844.48	997.83	10376.1	6510.44	1121.3	1243.17	330.68	2022.58	2626.88	3673.03	4563.8	3887.58	8107.6	27659	211	220.3	598.19	5542.4	3584.8	2728.17
2004-09-07	13136	786.69	842.29	818.8	11298.9	5264.67	1324.29	1961.47	3130.78	557.23	5846.83	10341.2	8369.37	22502	1858.56	988.55	10486.8	6555.64	1121.3	1240.15	331.74	2018.16	2626.52	3682.14	4565.6	3889.04	8112.1	27627	210.67	219.2	599.49	5559.8	3595.6	2730.69
2004-09-08	13050	789.14	850.11	815.85	11279.2	5298.16	1309.33	1959.13	3109.12	558.69	5846.02	10313.4	8354.79	22534	1850.64	986.74	10538	6534.09	1116.27	1239.03	331.28	2018.19	2631.7	3677.55	4558.4	3884.16	8096.4	27610	210.21	218.41	596.02	5556.5	3595.9	2740.75
2004-09-09	12942.2	782.65	846.97	821.88	11171	5298.23	1284.31	1965.28	3044.73	560.69	5842.93	10289.1	8394.03	22286	1869.65	995.53	10553.4	6544.31	1118.38	1244.89	327.87	2008.82	2624.37	3652.02	4538	3851.22	8039.1	27466	208.59	218.6	600.41	5522.3	3598.4	2740.75
2004-09-10	13004	797.78	850.29	836.34	11083.2	5370.05	1287.08	1967.7	3059.29	560.69	5846.19	10313.1	8368.62	21968	1894.31	1002.55	10661.5	6568.3	1123.92	1244.27	329.72	2011.11	2628.4	3677.61	4545	3886.03	8055.9	27590	209.84	219.62	604.5	5536.8	3602.5	2751.92
2004-09-13	13139.6	797.78	857.25	851.91	11253.1	5397.46	1260.32	1985.79	2997.88	563.75	5928.22	10314.8	8513.42	21809	1910.38	1025.39	10620.4	6581.81	1125.82	1246.18	334.19	1993.97	2635.7	3725.4	4558.5	3953.31	8120.1	27835	212.85	219.29	605.65	5573.3	3615.5	2734.4
2004-09-14	13148.1	809.02	856.71	851.42	11295.6	5428.77	1300.36	1994.13	3077.43	565.8	5919.77	10318.2	8492.59	22309	1915.4	1037.91	10701	6594.21	1128.33	1248.54	333.15	1996.62	2639.56	3708.03	4545.6	3947.75	8091.8	27767	212.38	220.12	612.49	5538.5	3630.2	2736.88
2004-09-15	13084.4	815.49	853.24	850.63	11158.6	5420.09	1355.23	2003.99	3210.31	565.8	5871.07	10231.4	8467.03	22344	1896.52	1026.41	10660.9	6546.32	1120.37	1239.24	332.07	1983.85	2656.17	3691.85	4548.4	3941.75	8060.7	27717	212.67	221.06	612.04	5536.6	3636.5	2740.76
2004-09-16	13209.8	813.06	857.79	855.38	11139.4	5477.68	1371.2	1997.12	3238.41	565.8	5891.05	10244.5	8493.37	22876	1904.08	1045.28	10660.9	6574.61	1123.5	1245.91	332.11	1995.99	2658.33	3691.68	4556.5	3963.65	8078.8	27745	212.62	223.47	615.5	5525.7	3636.7	2758.23
2004-09-17	13224.9	814.63	859.66	848.11	11082.5	5561.15	1414.7	2003.56	3347.07	565.8	5818.39	10284.5	8529.89	23074	1910.09	1056.9	10790.5	6604	1128.55	1247.78	334.9	2019.72	2670.83	3726.22	4591	3988.07	8085.3	27934	212.98	225.63	612.22	5543.1	3643.9	2767.6
2004-09-20	13221.3	814.63	865.34	856.87	11082.5	5545.82	1463.22	1988.11	3473	567.92	5864.54	10204.9	8539.82	23078	1908.07	1066.75	10803.7	6565.9	1122.2	1243.93	331.92	2022.39	2662.85	3703.69	4579.5	3977.68	8053.5	27904	212.53	224.74	612.58	5548.5	3641.4	2780.29
2004-09-21	13304.5	823.86	865.13	857.15	11080.9	5605.93	1448.56	2001.87	3460.25	567.92	5949.26	10244.9	8642.93	23106	1921.18	1089.1	10850.4	6633.22	1129.3	1262.33	334.07	2048.22	2678.25	3731.14	4608.4	3991.02	8071.1	28093	212.91	226.77	621.5	5602.7	3642.7	2794.74
2004-09-22	13272.2	818.23	856.3	835.1	11019.4	5616.87	1420.15	1993.55	3405.17	567.92	5970.18	10109.2	8586.09	22749	1885.71	1085.81	10777.2	6548.56	1113.56	1254.68	329.45	2038.69	2665.59	3692.11	4592.3	3942.35	8021.7	27984	213.11	226.6	624.6	5572.6	3652.6	2799.75
2004-09-23	13280.4	816.76	852.89	829.68	11019.4	5539.48	1464.78	1988.64	3530.3	561.61	5937.25	10038.9	8591.65	22944	1886.43	1101.11	10811.4	6521.43	1108.36	1261.46	326.37	2039.34	2640.88	3653.1	4568.3	3905.66	7990.9	27918	212.22	227.6	623.88	5511.3	3645.9	2788.88
2004-09-24	13066.8	819.82	855.32	832.1	10895.2	5527.75	1435.56	1973.46	3494.21	561.61	5892.21	10047.2	8588.4	22972	1879.48	1098.98	10856.4	6531.37	1110.11	1264.97	325.91	2026.74	2657.09	3673.51	4578.1	3910.3	7986.1	27983	211.95	229.38	624.41	5491.3	3635.6	2806.58
2004-09-27	13021.9	815.58	848.28	832.1	10859.3	5511.81	1427.4	1983.39	3467.78	562.18	5849.22	9988.54	8497.95	22834	1859.88	1112.97	10687.6	6496.37	1103.52	1263.14	323.47	2043.79	2652.48	3656.93	4541.2	3874.37	7939.7	27824	210.81	231.29	627.11	5446	3632.8	2810.74
2004-09-28	12950.8	812.13	845.46	832.1	10815.6	5462.61	1435.59	1979.1	3512.32	558.97	5849.22	10077.4	8617.2	23231	1869.87	1132.36	10843.4	6543.39	1110.06	1270.02	324.26	2028.67	2665.7	3667.47	4567.3	3882.27	7988.3	27959	211.06	232.53	629.14	5499.7	3637.9	2826.82
2004-09-29	12950.8	812.89	846.72	832.1	10786.1	5527.56	1420.01	1974.35	3477.88	558.97	5809.75	10136.2	8634.11	23208	1893.94	1147.12	10980.3	6560.68	1114.8	1264.38	325.3	2050.98	2690.93	3682.67	4588.1	3920.36	8048	28019	215.22	231.58	631.58	5531.4	3667.1	2828.53
2004-09-30	13120	820.13	849.96	835.09	10823.6	5583.61	1396.7	1984.74	3453.91	558.97	5845.69	10080.3	8668.29	23245	1896.84	1142.5	10957.4	6570.25	1114.58	1271.83	323.94	2042.87	2693.21	3640.61	4570.8	3892.9	8029.2	27794	214.31	231.75	631.65	5465.3	3674.7	2834.4
2004-10-01	13120	835.91	853.93	846.01	10985.2	5675.54	1396.7	1981.14	3453.91	558.97	5945.35	10192.6	8747.09	23777	1942.2	1160.12	11078.3	6663.18	1131.5	1279.27	330.87	2063.97	2725.12	3730.16	4659.6	3994.96	8220.6	28324	217.43	235.9	648.28	5528.9	3669	2834.4
2004-10-04	13359.2	856.45	865.07	880.84	11279.6	5766.3	1396.7	2013.89	3453.91	570.06	6077.96	10216.5	8812.91	24150	1952.4	1167.09	11181.6	6677.75	1135.17	1276.34	335.19	2076.22	2760.03	3767.06	4681.8	4033.28	8304.9	28515	220.13	239.2	663.26	5600.9	3703.1	2858.11
2004-10-05	13331.1	861.32	861.56	884.84	11281.8	5758.67	1396.7	2011.74	3453.91	569.82	6081.01	10177.7	8797.04	24205	1955.5	1135.37	11117.3	6679.25	1134.48	1286.68	336.1	2094.87	2765.83	3770.24	4707.1	4048.71	8305.3	28621	220.22	239.65	674.36	5596.9	3705	2860.82
2004-10-06	13271.6	856.06	861.54	887.45	11385.4	5713.75	1396.7	2016.04	3453.91	569.82	6060.61	10239.9	8871.93	24027	1971.03	1128	11090.9	6717.43	1142.05	1289.79	336.95	2119	2775.2	3764.59	4706.3	4049.66	8323.6	28579	219.34	239.64	679.01	5593.9	3709	2856.8
2004-10-07	13321.7	849.83	864.16	885.33	11354.6	5773.66	1396.7	2006.19	3453.91	569.82	6103	10125.4	8825.37	24104	1948.52	1140.26	11098	6654.22	1130.65	1278.5	337.68	2117.36	2771.84	3758.7	4698.7	4043.36	8332.7	28659	219.56	243.06	689.01	5534.7	3710.5	2854.74
2004-10-08	13241.5	855.72	861.08	881.38	11349.4	5776.85	1422.93	2004.3	3548.41	569.82	6102.16	10055.2	8814.89	23927	1919.97	1128.74	10921	6636.42	1122.14	1285.2	334.91	2117.79	2759.62	3737.87	4698.9	4015.54	8323.2	28588	219.06	242.58	690.6	5503.7	3696	2854.97
2004-10-11	13305.1	860.14	855.1	881.11	11349.4	5717.54	1413.15	1991.99	3531.12	563.38	6089.28	10082	8814.89	23954	1928.76	1128.74	10975.3	6643.17	1124.39	1284.73	334.43	2117.79	2759.16	3727.64	4685.5	4017.82	8301.7	28579	219.12	241.21	690.52	5474.7	3714.6	2861.47
2004-10-12	13251.6	849.19	852.8	858.09	11201.8	5676.73	1384.44	1971.04	3435.69	552.68	5979.56	10077.2	8785.86	23954	1925.17	1138.06	11023.2	6609.71	1121.84	1276.96	329.82	2096.23	2730.99	3689.85	4647.9	3966.48	8301.7	28388	217.35	237.64	667.24	5443.6	3727.1	2859.76
2004-10-13	13171.6	863.17	853.31	856.18	11196	5676.73	1386.72	1971.15	3446.76	552.22	5963.07	10002.3	8729.64	23289	1920.53	1165.66	10942.4	6556.53	1113.65	1273.4	331.53	2089.19	2752.51	3694.32	4634.8	3976.03	8296.4	28457	219.22	235.49	663.47	5462.8	3734	2859.76
2004-10-14	13035.4	859.66	852.16	846.63	11034.3	5713.1	1332.94	1951.47	3312.28	548.65	5831.07	9894.45	8745.64	22959	1903.02	1192.65	10876	6516.1	1103.29	1277.73	328.73	2084.72	2747.63	3664.95	4629.4	3940.46	8255.5	28366	217.74	232.8	662.19	5402.6	3719.9	2857.66
2004-10-15	13059.4	857.59	851.29	841.94	10983	5686.73	1330.52	1962.54	3301.23	548.65	5820.82	9933.38	8788.93	23368	1911.5	1228.85	10991.4	6559.38	1108.2	1285.65	327.94	2087.75	2743.56	3670.76	4622.7	3922.11	8261.1	28338	216.74	230.58	658.96	5362.4	3730.4	2837.25
2004-10-18	13034.7	854.39	851.69	848.27	10965.6	5679.83	1335.39	1950.55	3313.51	544.82	5772.12	9956.32	8788.9	23411	1936.52	1243.95	11055.8	6572.37	1114.02	1281.38	326.65	2094.27	2752.82	3659.81	4626.6	3915.17	8267	28281	216.44	232.45	668.52	5365.4	3721.2	2836.75
2004-10-19	13154.5	853.39	851.74	855.77	11064.9	5738.11	1337.62	1970.23	3325.62	548.81	5807.79	9897.62	8720.53	22893	1922.9	1215.42	11023.8	6530.39	1103.23	1286.55	330.15	2099.88	2768.28	3700.56	4655.2	3964.13	8347.7	28487	219.27	233.22	668.23	5417.5	3728	2815.39
2004-10-20	12999.1	840.79	848.65	828.61	10882.2	5673.02	1330.58	1953	3330.72	547.76	5788.34	9886.93	8788.11	22873	1932.97	1215.24	11076.9	6539.48	1103.66	1299.36	325.51	2087.66	2755.79	3665.68	4616.4	3912.4	8288.6	28320	216.48	229.82	641.19	5376.3	3710.9	2805.87
2004-10-21	13015.2	834.17	849.21	820.63	10789.2	5641.06	1310.55	1969.18	3291.92	549.27	5797.24	9865.76	8846.65	23059	1953.62	1234.56	11166.9	6563.49	1106.49	1303.74	326.65	2099.9	2764.12	3687.53	4617.4	3934.06	8345.6	28460	215.95	234.1	638.77	5400.9	3715.7	2802.81
2004-10-22	13015.2	850.77	853.88	828.17	10857.1	5641.06	1329.36	1967.07	3334.59	549.27	5774.67	9757.81	8780.79	22735	1915.14	1204.46	11226.1	6521.32	1095.74	1306.33	327.03	2110.94	2765.87	3687.17	4615.4	3935.14	8372.4	28520	214.29	235.45	648.14	5391.1	3720.7	2789.83
2004-10-25	12818.1	846.64	850.95	808.14	10659.1	5581.49	1311.15	1953.44	3246.03	545.31	5774.67	9749.99	8749.16	22603	1914.04	1209.47	11178	6520.9	1094.8	1308	322.03	2082.97	2730.58	3609.06	4564.5	3854.41	8230.2	28193	209.91	231.41	649.21	5309.7	3694.4	2789.83
2004-10-26	12852.4	841.35	851.55	813.7	10672.5	5651.09	1324.78	1957.41	3284.26	551.98	5662.88	9888.48	8818.18	22849	1928.77	1225.35	11341.6	6598.45	1111.09	1311.57	323.12	2082.97	2732.29	3619.48	4583.4	3862.26	8232.5	28233	210.77	228.35	653.23	5330	3718.2	2771.55
2004-10-27	12838.7	849.18	851.17	809.91	10692	5662.87	1342.8	1959.05	3296.69	545.8	5650.97	10002	8791	23171	1969.99	1286.08	11517.7	6665.87	1125.4	1314.84	327.72	2087.89	2758.92	3678.39	4630.1	3929.03	8338.4	28562	213.6	228.56	668.64	5374.9	3753.7	2778.53
2004-10-28	13113.1	862.12	852.99	833.54	10853.1	5715.62	1341.74	1988.05	3292.5	545.8	5695.56	10004.5	8781.04	22929	1975.74	1280.77	11442.5	6670.5	1127.44	1307.6	330.62	2114.18	2785.85	3721.82	4642.8	3959.59	8435.4	28754	214.61	226.13	657.66	5414.2	3784	2807.15
2004-10-29	13054.7	860.49	861.14	834.84	10771.4	5672.27	1320.54	1980.69	3216.35	545.8	5705.93	10027.5	8870.96	23052	1974.99	1287.14	11564.4	6692.71	1130.2	1311.39	330.48	2112.17	2785.45	3706.82	4624.2	3960.25	8418.3	28681	214.21	225.72	663.67	5363.4	3786.3	2812.34
2004-11-01	13094.2	863.59	864.04	835.66	10734.7	5704.1	1305.29	1978.79	3182.13	555.59	5656.17	10054.4	8858.23	23273	1979.87	1314.5	11622.4	6699.86	1130.51	1305.03	331.16	2112.17	2808.6	3734.07	4673.8	4012.64	8418.3	28971	216.67	227.74	665.71	5422.3	3797.4	2831.76
2004-11-02	13308.7	881.4	874.17	846.67	10887.8	5754.76	1301.53	1995.38	3159	555.92	5759.61	10035.7	8870.94	23273	1984.79	1299.92	11610.4	6701.47	1130.56	1305.26	334.28	2158.68	2828.11	3765.84	4693.2	4037.57	8506.1	29061	219.76	227.81	654.3	5486.1	3805.6	2853.43
2004-11-03	13397.7	890.36	878.45	861.05	10887.8	5842.54	1326.75	2017.43	3195.28	564.57	5862.85	10137	8841.35	23660	2004.33	1289.42	11765.8	6787.4	1143.2	1323.32	335.57	2158.96	2840.46	3769.93	4718.5	4039.04	8525.7	29115	220.76	229.85	657.69	5538.9	3839.2	2867.58
2004-11-04	13369.1	888.34	872.02	851.2	10946.3	5832.88	1304.78	2010.65	3112.34	563.13	5860.73	10314.8	8866.61	23880	2023.63	1302.9	11864.4	6885.2	1161.67	1329.48	333.56	2180.12	2827.6	3762.45	4728.3	4041.38	8533.8	29214	219.81	228.94	662.65	5549.9	3849.8	2884.77
2004-11-05	13495	893.64	871.48	860.68	11061.8	5891.36	1305.13	2015.77	3122.28	563.13	5931.31	10387.5	8868.74	23542	2038.94	1325.17	11793.9	6906.23	1166.17	1327.18	336.36	2180.29	2838.99	3780.99	4739.8	4063.58	8570.6	29330	221.05	231.35	670.84	5618.3	3854.5	2873
2004-11-08	13561.5	888.74	872.89	846.11	10983.8	5930.47	1304.23	2009.96	3122.19	563.91	5937.46	10391.3	8825.73	23212	2039.25	1296.96	11760	6890	1164.89	1319.75	337	2180.63	2829.92	3776.99	4716.6	4068.97	8578.1	29442	221.65	232.1	670.84	5602.5	3832.9	2880.58
2004-11-09	13516.7	901.38	876.37	844.15	10964.9	5929.6	1307.43	2011.51	3136.05	569.24	5945.2	10386.4	8845.16	23216	2043.33	1286.19	11786.9	6886.34	1164.08	1326.65	336.58	2176.85	2833.7	3769.94	4717.7	4065.33	8549.6	29377	221.78	232.1	674.37	5573.2	3846.5	2889.29
2004-11-10	13672.4	918.71	882.29	860.54	10995	5973.75	1354.39	2022.99	3254.46	570.74	5948.49	10385.5	8841.67	23455	2034.56	1297.23	11794	6891.22	1162.91	1335.23	338.43	2186.47	2849.76	3784.91	4734.5	4089.13	8527.9	29393	222.78	229.85	664.87	5609.6	3857.7	2891.73
2004-11-11	13624.5	925.18	882.29	861.26	10846.9	5954.31	1347.07	2022.99	3223.2	578.05	5874.52	10469.8	8886.17	23521	2061.27	1284.26	11972	6950.97	1173.48	1340.93	342.37	2210.3	2870.68	3833.79	4776.9	4130.81	8558.5	29690	224.17	230.18	660.85	5649.7	3873.6	2910.29
2004-11-12	13784.5	934.03	882.29	876.67	11020	5964.01	1352.22	2038.46	3227.44	578.05	5917.16	10539	8896.37	24035	2085.34	1257.6	11957.3	7014.18	1184.17	1356.24	343.61	2195.52	2862.31	3835.11	4793.9	4143.35	8550	29724	225.82	231.16	664.73	5689.2	3872.6	2923.66
2004-11-15	13932.2	934.03	882.29	882.33	11227.6	5964.01	1370.05	2038.46	3267.85	590.33	5906.69	10550.2	8937.21	24035	2094.09	1247.81	11955.4	7003.06	1183.81	1351.26	342.48	2179.73	2851.35	3820.97	4803.1	4134.34	8520.1	29642	226.08	231.93	663.06	5674.3	3890.9	2920.99
2004-11-16	13746.1	934.03	882.29	876.61	11161.8	5996.7	1370.39	2036.42	3274.23	594.72	5910.85	10487.6	8952	23772	2078.62	1257.75	11951.2	6959.3	1175.43	1349.2	339.54	2182.81	2830.5	3794.27	4770.4	4117.22	8458.2	29418	225.23	231.01	665.38	5653.6	3879.9	2906.89
2004-11-17	13825	934.03	901.66	885.42	11131.3	6016.58	1356.14	2046.4	3236.83	596.43	6028.68	10549.6	8987.6	24170	2099.68	1262.14	12020.4	7013.46	1181.94	1365.96	342.22	2216.11	2841.07	3844.14	4795.9	4183.41	8624	29831	227.84	233.29	673.06	5681.5	3889.9	2900.62
2004-11-18	13799.8	934.03	904.48	875.84	11082.4	6025.47	1367.83	2032.62	3284.36	594.48	6049.49	10572.5	8971.54	24143	2104.28	1263.63	12038.9	7002.91	1183.55	1365.36	341.68	2240.38	2840.99	3830.39	4805.3	4178.68	8636.3	29862	227.67	235.55	681.87	5673.8	3893.4	2913.67
2004-11-19	13787.7	934.03	897.03	867.03	11082.8	5961.71	1379.96	2038.21	3300.32	594.48	6026.55	10456.9	8959.4	24034	2070.63	1254.45	11839.2	6947.19	1170.34	1364.81	339.44	2249.58	2862.4	3798.78	4760.8	4134.89	8625.9	29718	225.71	237.45	655.44	5605	3887.3	2929.48
2004-11-22	13800.6	939.99	895.94	849.99	10849.4	5963.8	1383.02	2020.14	3305.27	586.47	5838.42	10489.4	8991.48	24445	2085.19	1193.37	11879.8	6979.79	1177.24	1367.4	337.45	2242.93	2861.53	3774.25	4733.1	4123.98	8603.4	29631	224.36	237.15	662.3	5562.2	3846.8	2927.68
2004-11-23	14023.3	959.02	909.38	860.4	10849.4	6009.86	1371.24	2029.86	3273.48	593.01	5851.1	10492.6	8995.19	24340	2084.28	1204.14	11876.6	6985.3	1176.94	1376.15	337.15	2247.46	2858.96	3780.09	4742.4	4113.37	8607.2	29589	225.3	240.45	653.97	5525.8	3878.9	2923.46
2004-11-24	13997	961.32	909.38	872.56	10872.3	6035.95	1359.13	2029.86	3255.06	596.02	5911.31	10520.3	8976.09	24368	2102.54	1182.17	11907.3	7016.35	1181.76	1383.4	337.27	2265.78	2872.25	3760.7	4719.4	4125.3	8668	29673	225.14	241.31	648.25	5501.2	3894.7	2923.46
2004-11-25	13926.6	955.68	905.22	872.49	10900.3	6035.03	1358.33	2034.88	3253.24	595.17	5855.24	10520.3	9025.9	24867	2102.54	1187.32	11997.6	7016.35	1181.76	1383.4	340.21	2279.24	2875.47	3797.59	4753.4	4160.35	8755.4	29841	226.84	242.74	632.44	5545.7	3914.8	2959.03
2004-11-26	13895	965.22	908.78	858.12	10833.8	6035.03	1356.73	2028.43	3259.94	595.17	5778.65	10522.2	9057.96	24998	2101.97	1183.16	12076.1	7046.69	1182.65	1407.14	340.2	2277.51	2881.38	3782.2	4741.5	4154.27	8739.2	29771	226.75	243.03	633.44	5548.5	3922.9	2968.49
2004-11-29	14066.9	964.09	915.9	865.4	10977.9	6157.77	1337.43	2038.72	3225.07	591.37	5785.26	10475.9	9056.41	24855	2106.87	1167.46	12196.4	7032.23	1178.57	1408.78	339.6	2297.53	2866.86	3780.61	4749.8	4146.98	8715.5	29680	227.51	244.87	631.87	5519.5	3938.1	2988.3
2004-11-30	14060	977.77	917.19	878.06	10899.2	6234.29	1340.77	2027.66	3226.01	589.41	5844.76	10428	9030.04	25128	2096.81	1213.09	12102.5	7005.72	1173.82	1406.08	337.15	2288.45	2850.95	3753.75	4703.2	4126	8693	29615	226.94	244.98	627.98	5444.2	3942.8	2990.8
2004-12-01	14162.8	986.2	914.62	876.8	10784.2	6227.83	1334.94	2038.84	3210.45	590.98	5798.62	10590.2	9064.46	25235	2138.23	1220.95	12233.9	7097.32	1191.37	1413.81	342.75	2325.11	2885.98	3796.71	4735.7	4186.03	8773.9	29917	228.67	245.25	611.07	5509.3	3914.3	2998.87
2004-12-02	14261.8	997.7	919.97	884.1	10973.1	6328.43	1333.09	2062.76	3196.9	597.11	5867.95	10585.1	9038.49	25200	2143.57	1193.59	12116.1	7074.82	1190.33	1402.85	344.45	2338.53	2905.45	3811.45	4751.2	4216.4	8811.4	29969	229.88	240.17	604.65	5569.3	3955.1	3013.48
2004-12-03	14211.8	981.41	917.17	882.55	11074.9	6322.76	1337.2	2061.58	3205.48	597.11	5893.27	10592.2	9055.66	25468	2147.96	1218.75	12109.5	7092.62	1191.17	1415.58	343.48	2346.86	2895.06	3783.51	4747.9	4208.87	8787.9	29908	227.68	237.47	595.39	5555.2	3951.4	3009.47
2004-12-06	14256.9	983.2	916.36	870.75	10982	6322.5	1339.64	2032.38	3202.84	609.27	5919.17	10547.1	9060.7	25633	2151.25	1223.54	12190.3	7082.58	1190.25	1408.54	342.23	2349.65	2894.61	3767.39	4722.8	4193.91	8787.9	30003	226.8	238.64	596.43	5520.7	3959.9	3015.1
2004-12-07	14235.8	986.41	912.41	861.07	10873.6	6316.28	1323.75	2016.26	3172.19	616.07	5925.28	10440.6	8990.95	24989	2114.66	1204.62	12118.3	7014.72	1177.07	1389.61	343.37	2364.03	2911.2	3787.45	4728.7	4212.62	8818.4	30173	228.64	241.14	607.55	5561.1	3939.7	3010.9
2004-12-08	14022.3	979.22	902.3	871.74	10941.4	6261.52	1326.44	2020.66	3177.01	614.81	5892.51	10494.2	9003.74	24968	2126.11	1204.62	12113.6	7029.97	1182.81	1386.62	343.31	2364.03	2906.39	3775.04	4703.9	4201.35	8818.4	30272	227.24	236.68	574.09	5566.7	3909.8	2991.15
2004-12-09	14008.8	963.8	894.98	861.31	10776.6	6304.27	1338.81	1999.14	3219.65	610.09	5913.97	10552.8	9013.54	24526	2129.01	1219	12124.8	7048.1	1189.24	1386.57	340.13	2338.81	2897.95	3747.46	4688.4	4150.41	8775.6	30071	224.91	238.72	546.11	5557.8	3898.9	2977.5
2004-12-10	13901.8	945.23	894.23	844.85	10756.8	6233.54	1317.72	2016.33	3195.87	610.09	5911.63	10543.2	8965.27	24933	2128.07	1234.3	12260.9	7028.51	1188	1392.08	341.8	2336.13	2901	3768.42	4694	4174.55	8827.2	30253	226.1	238.96	545.52	5581.8	3911.4	2981.89
2004-12-13	13886.2	935.78	897.34	844.2	10789.2	6268.72	1309.7	2017.29	3195.82	622.58	5878.89	10638.3	9032.77	25225	2148.5	1233.32	12290.2	7102.41	1198.68	1399.05	345.31	2364.78	2921.98	3805.94	4736.8	4219.24	8887.9	30343	226.4	238.04	545.52	5624.9	3919.5	2986.18
2004-12-14	14043.5	922.07	897.02	849.4	10915.6	6325.53	1307.55	2031.29	3185.99	623.03	5909.65	10676.5	9086.36	25563	2159.84	1237.49	12430.9	7124.61	1203.38	1404.23	346.17	2387.27	2926.39	3814.39	4722.8	4231.3	8893.8	30408	226.41	239.29	563.55	5653	3936.8	2977.01
2004-12-15	14078.5	939.15	904.76	868.84	10956.5	6402.29	1313.05	2048.79	3212.51	622.84	6002.58	10691.5	9106.16	25576	2162.55	1253.47	12493.9	7159.65	1205.72	1415.78	344.51	2391.55	2927.36	3802.99	4728.2	4213.69	8871.2	30356	225.96	240.22	572.25	5640.3	3953	2975.43
2004-12-16	14024.6	957.17	904.29	873.7	10924.4	6420.38	1305.02	2034.3	3190.17	629.31	6019.23	10705.6	9116.64	25831	2146.15	1246.68	12505.5	7131.98	1203.21	1407.9	346.43	2389.97	2933.6	3810.67	4735.2	4233.71	8898.8	30399	226.66	242.55	567.37	5650.5	3982.3	2978.9
2004-12-17	13992.4	973.35	903	875.13	11078.3	6346.48	1290.49	2057.98	3157.35	629.31	6009.32	10649.9	9122.62	25659	2135.2	1255.84	12519.8	7098.15	1194.2	1409.21	343.49	2389.13	2915.31	3744.92	4696.8	4182.27	8866	30273	223.84	240.67	555.88	5603.4	3995.3	2975.34
2004-12-20	14214	966.81	909.61	884.31	11103.4	6403	1275.46	2056.24	3104.7	626.36	5985.94	10661.6	9176.94	25537	2127.85	1305.87	12514.1	7116.98	1194.65	1414.57	343.42	2409.31	2922.3	3764.04	4731.1	4211.55	8894.5	30468	225.48	245.09	549.02	5650.7	3998.4	2958.43
2004-12-21	14180.8	976.32	906.5	882.82	11125.9	6451.3	1275.17	2063.59	3097.92	616.65	5987.85	10759.4	9237.48	25890	2150.91	1325.29	12651.7	7167.03	1205.45	1411.92	344	2413.43	2931.48	3770.03	4733	4214.39	8941.8	30548	226.47	247.28	585.86	5640.8	4018.3	2969.07
2004-12-22	14151.1	985.18	903.3	883.38	11209.4	6413.66	1307.57	2055.77	3169.32	618.65	6001.52	10815.9	9251.17	25723	2157.03	1322.37	12712.2	7190.14	1209.57	1407.79	346.81	2416.45	2950.1	3806.15	4777.4	4241.28	9025	30771	228.15	248.1	582.94	5687.7	4037.4	2991.46
2004-12-23	14235.3	986.51	909.3	876.88	11209.4	6441.85	1282.72	2055.48	3123.05	620.24	5997.67	10827.1	9235.18	25878	2160.62	1356.6	12748.5	7208.78	1210.13	1417.75	348.33	2416.3	2944.85	3819.68	4787.7	4251.62	9054.2	30867	228.34	247.96	595.46	5695.2	4029.4	2998.76
2004-12-24	14194.9	986.51	907.2	879.92	11365.5	6498.06	1285.04	2055.56	3125.49	620.24	6019.42	10827.1	9287.4	25878	2160.62	1366.69	12802.8	7208.78	1210.13	1417.75	348.07	2416.3	2940.38	3822.76	4798.1	4251.62	9054.2	30867	228.34	247.96	597.17	5695.2	4049.3	3004.48
2004-12-27	14194.9	997.52	906.89	876.98	11362.4	6513.03	1280.27	2050.99	3138.56	632.75	5985.94	10776.1	9287.4	25937	2154.22	1376.25	12819.6	7197.27	1204.92	1424.7	347.81	2420.75	2943.77	3817.69	4798.1	4235.36	9050.7	30824	228.33	248.84	605.78	5685.5	4049.3	3004.48
2004-12-28	14197	1003.92	906.55	878.43	11424.1	6563.48	1278.94	2058.12	3117.03	630.04	6000.57	10854.5	9287.4	26117	2177.19	1366.73	12912.7	7245.81	1213.54	1426.38	348.41	2429.56	2938.3	3824.83	4798.1	4261.79	9077.1	30904	227.75	246.93	600.13	5686.5	4049.3	3004.48
2004-12-29	14266.4	1004.43	907.58	884.27	11381.6	6567.94	1274.31	2057.82	3110.41	629.9	6088.49	10829.2	9229.08	26161	2177	1389.53	13031.6	7242.24	1213.45	1426.73	347.32	2430.24	2933.34	3827.16	4819.8	4247.75	9100.7	30888	227.86	247.02	598.55	5686.5	4044	3027.08
2004-12-30	14163.5	1000.23	910.13	895.92	11488.8	6522.54	1273.71	2061.56	3112.43	635.95	6100.86	10800.3	9264.4	26196	2178.34	1384.61	12968.7	7253.56	1213.55	1430.07	347.27	2431.38	2933.72	3827.95	4820.1	4256.08	9080.8	30903	228.41	247.57	605.66	5693.2	4057	3046.91
2004-12-31	14230.1	1000.23	907.43	895.92	11488.8	6602.69	1266.5	2066.14	3067.57	635.95	6139.69	10783	9246.65	26196	2175.44	1375.37	12917.9	7250.06	1211.92	1434.34	348.08	2431.38	2932.62	3821.16	4814.3	4256.08	9080.8	30903	228.41	247.57	614.11	5693.2	4053.1	3064.44
2005-01-03	14237.4	1000.88	903.84	893.71	11488.8	6679.2	1266.5	2070.15	3067.57	644.68	6143.12	10729.4	9246.65	25722	2152.15	1369.5	13022.8	7179.71	1202.08	1410.08	351.91	2451.76	2969.36	3855.68	4814.3	4291.53	9124.1	31005	229.93	248.78	614.11	5768.7	4053.1	3064.44
2005-01-04	14045.9	1018.54	902.49	886.9	11517.8	6651.01	1242.77	2068.49	3025.42	642.57	6060.46	10630.8	9142.98	24848	2107.86	1337.46	12777.1	7090.52	1188.05	1399.05	352.68	2469.88	2987.09	3863.3	4847	4290.5	9120	31094	231.58	246.53	614.11	5775.5	4060.7	3064.44
2005-01-05	13764.4	1015.43	907.96	885.19	11437.5	6458.84	1252.7	2071.04	3052.86	629.27	5988.37	10597.8	9021.04	24692	2091.24	1305.56	12591.3	7055.21	1183.74	1385.85	350.16	2446.96	2971.79	3829.36	4806	4258.24	9024.4	30976	229.44	243.81	614.11	5725.5	4043.4	3087.39
2005-01-06	13712	1029.89	910.42	871.28	11492.3	6367.39	1239.43	2089.82	3028.73	642.84	5982.12	10622.9	9064.26	24367	2090	1316.63	12703.5	7076.94	1187.89	1387.97	353.6	2446.96	2992.43	3856.48	4824.3	4300.94	9024.4	31073	229.44	245.33	614.11	5742.4	4033.3	3093.76
2005-01-07	13574.9	1032.53	916.28	870.84	11433.2	6420.46	1244.75	2085.58	3035.59	642.84	5935.99	10604	9006.21	24747	2088.61	1309.45	12453.3	7057.51	1186.19	1392.49	354.46	2475.13	3002.65	3877.96	4854.1	4316.4	9041.1	31128	230.42	247.28	614.11	5735.2	4062.8	3086.9
2005-01-10	13531.4	1015.48	919.02	874.18	11433.2	6308.54	1252.4	2089.68	3062.73	655.62	5942.85	10621	9026.83	24292	2097.04	1334.58	12446.1	7081.7	1190.25	1397.96	355.13	2455.04	3001.24	3877.82	4840.7	4307.37	9028.5	31134	233.19	249.85	614.11	5731.8	4071.7	3076.27
2005-01-11	13509.2	1015.48	930.63	884.29	11540	6222.87	1257.46	2092.21	3069.57	652.42	5975.66	10556.2	9020.69	24370	2079.62	1350.92	12216.8	7044.11	1182.99	1392.67	352.38	2435.34	2980.23	3848.99	4818.7	4258.01	8966.4	30740	230.74	248.48	607.57	5713.1	4070.3	3083.71
2005-01-12	13565.3	1008.58	933.33	880.03	11453.4	6102.74	1256.92	2079.8	3064.34	652.57	5879.08	10617.8	9022.7	24510	2092.53	1344.11	12329.2	7075.64	1187.7	1396.98	350.1	2421.63	2973.92	3816.14	4783.6	4208.82	8945.7	30645	227.09	247.71	605.46	5669.6	4068.3	3058.66
2005-01-13	13573.3	1021.67	934.1	885.54	11358.2	6221.06	1256.31	2082.34	3074.36	649.08	5853.94	10505.8	9009.14	24806	2070.56	1347.29	12462.9	7028.67	1177.45	1400.6	351.09	2415.01	2959.72	3834.11	4800.3	4212.14	9016.8	30863	227.99	249.95	605.21	5687.8	4069.1	3072.93
2005-01-14	13494.8	1021.34	929.74	905.1	11438.4	6173.82	1245.62	2076.13	3055.52	649.08	5889.52	10558	9057.16	24924	2087.91	1344.7	12694.7	7066.22	1184.52	1399.07	352.73	2424.34	2958.79	3854.6	4820.8	4232.36	9025.1	31056	229.44	251.85	611.74	5730.1	4062.9	3056.82
2005-01-17	13621.6	1024.89	932.26	923.08	11487.1	6194.07	1216.65	2087.12	2999.02	645.53	5945.27	10558	9063.84	24515	2087.91	1348.69	12817.9	7066.22	1184.52	1399.07	354.24	2443.14	2974.77	3881.44	4846.7	4245.51	9094.4	31126	230.93	254.9	613.62	5761.3	4079	3056.82
2005-01-18	13604.2	1024.89	937.56	920.57	11423.3	6192.35	1225.45	2084.19	3022.41	648.4	5933.57	10628.8	9134.77	24089	2106.04	1345.47	13029.7	7114.53	1195.98	1421.2	354.22	2452.95	2969.49	3875.02	4823.9	4250.71	9096.9	31094	230.53	255.63	601.76	5739.4	4065.5	3081.56
2005-01-19	13678.6	1027.81	935.53	916.27	11405.3	6173.32	1218.11	2097.39	3001.24	652.69	5895.35	10540	9120.35	24271	2073.59	1336.96	13035.8	7059.27	1184.63	1415.42	353.94	2437.76	2967.29	3869.01	4818.3	4245.55	9087.6	31221	230.77	254.81	599.52	5749.5	4055.7	3078.64
2005-01-20	13543.6	1035.75	929.72	909.37	11284.8	6183.24	1204.39	2085.39	2969.12	651.2	5888.1	10471.5	9088.98	23610	2045.88	1319.19	12770	7010.47	1175.41	1405.76	352.75	2429.17	2962.4	3842.44	4800.8	4220.43	9017.7	31132	228.35	251.75	591.67	5728.1	4038.5	3054.21
2005-01-21	13481	1035.75	929.72	919.61	11238.4	6183.24	1234.48	2085.39	3055.81	651.2	5848.91	10393	9086.83	23818	2034.27	1325.74	12673.6	6996.56	1167.87	1414.58	353.55	2438.95	2979.18	3854.19	4803.3	4213.7	8999.4	31190	227.91	253.78	593.22	5738.1	4046.4	3055.46
2005-01-24	13387	1030.72	923.33	923.11	11289.5	6106.43	1255.78	2074.24	3111.4	659.69	5771.48	10368.6	9078.2	24198	2008.7	1311.92	12743.6	6984.03	1163.75	1416.18	353.56	2444.73	2971.23	3848.71	4812.5	4201.89	8967.1	31042	225.82	253.61	599.71	5750.5	4047.6	3057.35
2005-01-25	13584.1	1026.89	919.75	915.1	11276.9	6162.98	1254.23	2065.71	3141.86	654.74	5782.75	10461.6	9125.1	24198	2019.95	1309.67	12866.8	6998.64	1168.41	1407.96	356.36	2475.38	3000.33	3882.04	4843.2	4233.95	9033.2	31221	228.35	255.7	607.14	5766.1	4056.4	3076.53
2005-01-26	13623.7	1037.51	923.37	927	11376.6	6162.98	1241.96	2086.93	3122.62	651.96	5835.37	10498.6	9162.36	24530	2046.09	1355.32	13045	7046.4	1174.07	1420.49	356.51	2486.49	3008.58	3879.82	4847.1	4214.12	9058.1	31164	228.6	255.31	605.31	5768.4	4056.4	3092.15
2005-01-27	13628.9	1044.99	919.95	924.87	11341.3	6239.43	1225.89	2073.12	3070.58	642.15	5842.76	10467.4	9174.41	24030	2047.15	1378.43	12986.4	7048.97	1174.55	1422.47	358.57	2506.92	3005.41	3891.4	4853.4	4216.41	9125.3	31129	229.81	256.19	612.24	5773.7	4101.2	3076.29
2005-01-28	13650.1	1046.48	917.23	921.59	11320.6	6419.09	1213.67	2089.51	3065.61	642.15	5879.93	10427.2	9141.78	23968	2035.83	1381.92	13040.5	7031.99	1171.36	1421.86	357.02	2492.74	2985.31	3870.35	4832.8	4201.81	9139.4	31008	228.16	255.27	625.15	5750.7	4096.4	3085.45
2005-01-31	13721.7	1045.44	916.27	932.7	11387.6	6555.94	1191.82	2096.32	3045.48	658.39	5994.23	10489.9	9204.04	24351	2062.41	1373.79	13097.1	7089.83	1181.27	1428.39	360.42	2494.21	2997.6	3913.69	4852.3	4254.85	9223.9	31334	229.96	255.56	637.21	5771.4	4106.7	3075.58
2005-02-01	13578.3	1047.53	916.27	923.69	11384.4	6552.47	1188.93	2094.65	3066.23	660.61	5981.54	10551.9	9270.12	24149	2068.7	1373.41	13340.5	7146.21	1189.41	1433.16	364.41	2518.97	3010.57	3939.18	4906.2	4279.97	9257	31515	232.25	258.29	640.32	5797.9	4127.2	3092.82
2005-02-02	13555.8	1052.82	918.51	921.44	11407.1	6530.06	1252.5	2108.69	3221.21	665.29	6018.69	10596.8	9303.94	24605	2075.06	1371.02	13339.4	7169.39	1193.19	1449.4	365.46	2522.37	3027.4	3951.72	4916.2	4296.31	9307	31563	233.51	261.51	650.98	5795.1	4141.2	3091.87
2005-02-03	13515.3	1049.33	917.85	928.79	11389.4	6619.97	1242.31	2108.16	3196.55	676	6034.6	10593.1	9303.7	24874	2057.64	1399.23	13440.8	7148.32	1189.89	1450.64	364.83	2527.5	3043.48	3928.94	4908.3	4281.64	9310.4	31537	232.74	261.399	654.84	5816.9	4146.3	3097.32
2005-02-04	13585.2	1048.39	907.52	933.55	11360.4	6618.23	1269	2113.58	3266.01	676	6034.6	10716.1	9358.28	25732	2086.66	1428.54	13447	7217.43	1203.03	1470.68	367.32	2566.12	3067.13	3958.01	4941.5	4339.28	9422.5	31896	234.38	264.19	654.63	5843.1	4156.2	3124.05
2005-02-07	13795	1041.63	912.58	949.19	11499.9	6535.17	1269	2118.1	3266.01	668.24	6034.6	10715.8	9371.89	25732	2082.03	1434.03	13476.8	7200.91	1201.72	1468.9	369.13	2576.2	3073.52	3981.9	4979.8	4366.35	9461.7	32039	237.36	267.32	656.59	5870.7	4182.9	3144.38
2005-02-08	13845.6	1036.6	914.91	949.19	11490.4	6544.77	1269	2140.16	3266.01	670.05	6034.6	10724.6	9392.68	25732	2086.68	1480.11	13508.5	7207.45	1202.3	1472.18	369.1	2578.65	3081.46	3980.77	4995.5	4371.39	9479.2	32176	236.87	264.78	654.96	5881.2	4172.3	3148.61
2005-02-09	13845.6	1036.6	914.91	949.19	11473.4	6593.53	1269	2140.16	3266.01	664.75	6034.6	10664.1	9402.62	26314	2052.55	1484.6	13662.4	7161.99	1191.99	1465.17	368.36	2580.26	3085.13	3969.62	4990.4	4353.15	9450.8	32101	238.62	264.87	656.59	5866.5	4163.2	3175.32
2005-02-10	13845.6	1036.6	914.91	949.19	11553.6	6577.83	1269	2140.16	3266.01	662.82	6034.6	10749.6	9496.36	26416	2053.1	1487.39	13708.9	7210.65	1197.01	1480	367.48	2569.83	3077.69	3970.37	5000	4342.01	9451.2	32134	234.88	266.39	654.6	5871.2	4160	3161.13
2005-02-11	13845.6	1045.87	914.91	947.23	11553.6	6633.76	1269	2149.6	3266.01	662.82	6034.6	10796	9558.5	26671	2076.66	1496.91	13714.6	7261.64	1205.3	1491.1	371.05	2587.39	3112.27	4016.75	5044.2	4387.8	9588.3	32328	237.8	269.32	655.04	5915.3	4160.8	3163.4
2005-02-14	14017.2	1050.73	920.31	964.79	11632.2	6679.33	1269	2164.93	3266.01	673.83	6112.4	10791.1	9585.21	26532	2082.91	1517.93	13565	7280.37	1206.14	1502.11	371.8	2603.54	3101.57	4012.11	5041.8	4386.4	9585	32307	237.72	269.39	653.65	5913	4143	3184.94
2005-02-15	13995.8	1067.2	921.71	968.88	11646.5	6670.06	1269	2163.39	3266.01	671.03	6122.39	10837.3	9570.03	26610	2089.21	1493.96	13695.9	7303.96	1210.12	1493.2	373.81	2624.78	3128.85	4030.45	5058.9	4402.03	9634.3	32371	239.09	270.59	658.66	5916.9	4136.3	3184.94
2005-02-16	14015.5	1073.44	919.43	971.56	11601.7	6607.78	1278.88	2155.1	3283.88	670.52	6143.49	10834.9	9639.59	26384	2087.43	1508.84	13640.8	7306.76	1210.34	1496.82	372.52	2636.88	3121.62	4009.02	5053.2	4368.77	9575.6	32142	237.74	269.21	661.99	5870.8	4142.8	3184.94
2005-02-17	13967.8	1082.98	912.62	972.56	11582.7	6589.29	1276.13	2164.2	3264.34	669.16	6072.16	10754.3	9619.26	27091	2061.34	1531.86	13592	7272.54	1200.75	1497.77	373.98	2638.69	3115.09	4005.5	5057.4	4369.68	9585.7	32161	238.07	272.15	665.69	5882.9	4155	3164.01
2005-02-18	14087.9	1092.49	907.75	984.1	11660.1	6584.32	1258.97	2168.86	3233.57	669.16	6115.43	10785.2	9658.75	26756	2058.62	1557.77	13580.3	7287.47	1201.59	1501.57	375.47	2661.04	3115.68	4029.02	5057.2	4359.47	9570.1	32008	236.31	270.33	669.08	5901.7	4151.8	3157.15
2005-02-21	14111.6	1093.78	904.72	988.71	11651	6534.68	1284.48	2166.38	3298.47	662.52	6142.78	10785.2	9682.31	26853	2058.62	1534.01	13600.5	7287.47	1201.59	1501.57	374.99	2643.83	3093.6	4022.62	5060.8	4353.34	9464.6	31675	237.26	271.4	674.62	5928	4153.6	3184.56
2005-02-22	14090.5	1099.91	904.75	977.8	11597.7	6589.41	1309.28	2146.73	3382.98	654.39	6107.17	10611.2	9640.46	26740	2030.32	1556.03	13520.6	7211.17	1184.16	1489.54	373.13	2616.08	3077.95	4002.33	5032.9	4323.21	9350.3	31507	236.63	270.5	673.13	5911.5	4138.4	3162.39
2005-02-23	13957.9	1102.93	899.68	968.43	11500.2	6582.5	1309.48	2136.42	3383.06	652.48	6121.52	10673.8	9675.69	27198	2031.25	1520.9	13542	7243.28	1190.8	1497.89	370.68	2579.98	3053.56	3977.19	4988.5	4310.66	9354.1	31400	236.61	269.91	673.13	5867.2	4103.3	3146.32
2005-02-24	14060.9	1102.02	903.64	987.1	11531.1	6574.21	1309.95	2152.59	3379.49	657.38	6128.34	10748.8	9657.74	28436	2051.7	1529.64	13684.6	7283.28	1200.2	1505.34	370.29	2619.54	3048.52	3977.67	4972.1	4304.29	9352.6	31403	237.6	273.35	690.23	5886.2	4086.7	3145.39
2005-02-25	14157.1	1083.38	903.51	996.95	11658.2	6569.72	1312.45	2135.08	3385.44	657.38	6207.83	10841.6	9741.37	28425	2065.4	1600.32	13870.2	7361.89	1211.37	1516.48	374.56	2677.63	3070.06	4034.57	5006.8	4348.64	9439.7	31744	240.1	275.71	701.35	5936.2	4116.4	3160.98
2005-02-28	14195.4	1073.83	907.38	1011.36	11740.6	6713.86	1306	2119.4	3376.32	672.37	6207.83	10766.2	9668.32	28139	2051.72	1558.62	13789.5	7321.23	1203.6	1509.44	374.37	2703.97	3106.54	4027.16	4968.5	4350.49	9391	31850	240.43	278.27	716.42	5931.3	4156.5	3208.42
2005-03-01	14061.1	1093.28	898.49	1011.36	11780.5	6651.08	1303.41	2125.11	3348.45	678.35	6259.69	10830	9728.03	27730	2071.25	1598.38	13804.8	7351.03	1210.41	1515.78	375.71	2702.39	3117.76	4054.98	5000.5	4383.62	9472.3	31949	240.9	277.69	714.1	5975.5	4164.3	3196.02
2005-03-02	13850.8	1082.75	891.9	1007.48	11813.7	6686.89	1287.87	2144.36	3301.76	675.78	6225.25	10812	9800.07	28200	2067.5	1582.39	13770.3	7343.14	1210.08	1519.6	376.27	2691.1	3097.66	4062.72	4992.8	4393.43	9443.6	31933	242.37	275.58	704.05	6013.4	4172.2	3199.2
2005-03-03	13892.4	1094.6	889.44	1010.92	11856.5	6784.72	1294.34	2147.53	3334.46	681.82	6202.38	10833	9859.53	28668	2058.4	1577.13	13783	7357.12	1210.47	1519.6	376.16	2723.98	3090.98	4061.35	5014.8	4373.27	9418.8	31902	242.51	278.68	702.58	5998.8	4185.8	3195.34
2005-03-04	13730.8	1103.01	885.33	1012.96	11873	6849.48	1287.71	2154.55	3332.15	681.82	6193.62	10940.5	9927.2	29197	2070.61	1581.36	13862.8	7441.18	1222.12	1532.49	378.65	2755.33	3121.66	4091.58	5036.3	4423.52	9538	32160	244.97	282.62	706.76	6009.3	4201.9	3200.09
2005-03-05	13730.8	1103.01	885.33	1012.96	11873	6849.48	1287.71	2154.55	3332.15	681.82	6193.62	10940.5	9927.2	29197	2070.61	1581.36	13862.8	7441.18	1222.12	1532.49	378.65	2755.33	3121.66	4091.58	5036.3	4423.52	9538	32160	244.97	282.62	712.03	6009.3	4201.9	3200.09
2005-03-07	13772	1105.3	891.18	1007.5	11925.4	6878.98	1293.74	2166.12	3368.67	688.17	6220.52	10936.9	9886.09	29455	2090.21	1590.74	13877.7	7440.31	1225.31	1526.16	379.76	2781.55	3153.12	4108	5027.2	4428.09	9545.9	32236	244.06	282.35	712.03	6014.6	4218.6	3213.36
2005-03-08	13881.7	1114.21	897.5	1000.28	11886.9	6915.09	1318.27	2160.63	3451.82	687.26	6173.34	10912.6	9903.34	29021	2073.55	1596.81	13752.8	7426.17	1219.43	1529.9	377.68	2756.71	3152.48	4085.38	5010.9	4396.5	9480.2	32048	242.66	281.29	712.03	5980.2	4223.3	3231.11
2005-03-09	13941.5	1116.81	903.62	1008.79	11966.7	6892.82	1316.79	2184.29	3464.66	683	6213.28	10805.6	9795.14	28514	2061.29	1530.02	13671.4	7354.74	1207.01	1500.79	376.32	2734.42	3133.65	4066.69	4996.1	4375.6	9410.3	31963	242.72	281.03	716.83	5965.5	4223	3238.53
2005-03-10	13856	1108.05	899.32	998.66	11864.9	6907.65	1286.23	2170.2	3373.54	684.89	6192.53	10851.5	9675.57	28567	2059.72	1471.89	13421.4	7354.98	1209.25	1483.46	372.6	2714.01	3098.25	4038.21	4962.1	4337.68	9319.4	31702	240.2	276.77	705.95	5945.7	4199.2	3195.22
2005-03-11	13890.9	1108.05	901.45	1022.79	11923.9	6853.73	1289.94	2169.41	3408.84	684.89	6204.23	10774.4	9691.44	28075	2041.6	1435.95	13532.4	7330.43	1200.08	1483.39	372.15	2714.02	3098.99	4049.18	4982	4360.49	9330.2	31680	241.51	277.9	704.54	5971.9	4192.5	3149.76
2005-03-14	13906.9	1123.48	901.64	1019.69	11850.2	6810.04	1293.5	2168.97	3420.55	686.9	6155.51	10804.5	9715.36	28099	2051.04	1374.88	13238.5	7353.89	1206.83	1482.59	372.16	2718.46	3081.07	4048.55	4975	4367.3	9296.5	31717	242	277.25	697.54	5963	4218.6	3149.76
2005-03-15	13816.8	1119	898.2	993.13	11821.1	6752.45	1269.14	2163.93	3366.68	686.7	6063.48	10745.1	9709.27	27588	2034.98	1386.08	13184.3	7310.41	1197.75	1486.06	373.88	2723.7	3096.6	4077.74	5000.2	4387.69	9354.7	31966	243.5	278.38	698.71	6011.5	4210.9	3165.67
2005-03-16	13832.5	1138.23	897.51	993.13	11873.2	6746.88	1255.59	2169.64	3341.12	674.48	6072.36	10633.1	9712.54	27827	2015.75	1388.09	13096.5	7264.47	1188.07	1483.84	368.37	2681.87	3076.07	4019.4	4937.6	4309.11	9201.2	31577	240.12	275.44	677.12	5944.8	4229.9	3155.38
2005-03-17	13818	1134.59	899.26	980.05	11775.5	6669.52	1243.48	2159.89	3296.17	675.05	6032.47	10626.4	9778.2	28086	2016.42	1452.94	13138.8	7284.31	1190.21	1487.37	368.36	2655.57	3075.89	4032.07	4922.1	4315.92	9235.8	31639	240.44	280.75	680.21	5929	4217.3	3124.96
2005-03-18	13828.4	1147.87	894	979.72	11879.8	6700.34	1227.4	2174.49	3255.28	675.05	6043.95	10629.7	9754.69	27593	2007.79	1458.19	13094.4	7276.84	1189.65	1483.94	369.84	2640.65	3090.94	4050.77	4923.3	4327.18	9263.9	31868	239.89	280.33	679.27	5897	4236.8	3129.2
2005-03-21	13834.4	1151.56	885.62	979.27	11879.8	6656.69	1231.05	2177.52	3276.52	676.55	6058.96	10565.4	9693.54	27411	2007.51	1414.4	13094.4	7229.2	1183.78	1470.99	369.06	2610.52	3093.57	4033	4933.5	4296.36	9225.4	31929	238.92	280.44	667.23	5907.7	4255.8	3140.84
2005-03-22	13776.5	1152.6	878.63	980.41	11842	6535.45	1206.92	2176.41	3249.5	675.56	6018.79	10470.5	9647.21	26618	1989.34	1393.57	13062.5	7158.97	1171.71	1467.5	369.67	2637.8	3084.73	4047.18	4937.3	4320.69	9299.2	31965	240.51	279.07	674.29	5915.6	4225.5	3127.33
2005-03-23	13603.6	1142.15	881.25	966.81	11739.1	6454.46	1201.65	2145.1	3220.07	662.44	6019.49	10456	9549.67	26248	1990.22	1364.28	12852.8	7127.18	1172.53	1442.9	369.06	2605.48	3068.71	4032.41	4910.4	4317.2	9252.1	31905	240.74	274.83	661.95	5926	4164.6	3127.33
2005-03-24	13597.1	1114.55	882.39	956.33	11746	6442.87	1208.19	2151.45	3214.98	658.68	6001	10442.9	9533.1	26702	1991.06	1364.28	12852.8	7128.8	1171.42	1448.79	371.62	2615.44	3128.49	4078.31	4922.5	4343.6	9309.3	32115	241.29	274.83	678.7	5935.5	4131.6	3074.97
2005-03-25	13597.1	1114.55	883.4	965.3	11761.1	6442.87	1205.63	2151.45	3214.85	658.68	6065.91	10442.9	9533.1	26702	1991.06	1364.28	12852.8	7128.8	1171.42	1448.79	371.62	2615.44	3128.49	4078.31	4922.5	4343.6	9309.3	32115	241.29	274.83	686.54	5935.5	4131.6	3074.97
2005-03-28	13597.1	1100.24	885.44	977.7	11792.3	6510.74	1200.11	2144.36	3213.31	669.36	6048.74	10485.6	9482.37	26257	1992.52	1347.99	12828.9	7131.52	1174.28	1441.41	371.62	2615.44	3128.49	4078.31	4922.5	4343.6	9309.3	32115	241.29	274.83	680.52	5935.5	4131.6	3074.97
2005-03-29	13411.9	1070.3	881.87	958.96	11599.8	6367.86	1195.02	2127.71	3208.44	668.52	5961.24	10405.7	9395.42	25842	1973.88	1347.77	12581.8	7131.52	1165.36	1436.63	371.47	2635.98	3119.37	4081.65	4919	4351.89	9324.1	32181	241.24	274.01	674.48	5959.8	4091.9	3055.58
2005-03-30	13425.8	1065.13	877.75	955.45	11565.9	6381.4	1172.57	2123.16	3137.46	660.72	5957.98	10540.9	9484.26	26470	2005.67	1401.12	12653.4	7158.5	1181.41	1449.5	368.98	2635.57	3125.01	4064.61	4900.7	4347.52	9280.1	32206	240.39	271.1	665.33	5932.9	4083.6	3039.43
2005-03-31	13516.9	1080.17	871.35	965.68	11669	6492.82	1181.24	2141.43	3170.35	664.64	6005.88	10503.8	9612.37	26611	1999.23	1400.42	12676.9	7167.53	1180.59	1459.7	369.56	2632.9	3125.67	4067.78	4894.4	4348.77	9258.8	32302	240.93	274.4	669.07	5929.7	4100.6	3039.08
2005-04-01	13491.4	1095.07	875.92	981.9	11723.6	6605.04	1223.57	2143.75	3284.95	664.64	6028.75	10404.3	9638.62	26774	1984.81	1424.31	12714.2	7136.36	1172.92	1462.91	368.2	2671.04	3140.33	4080.08	4914	4373.53	9289.5	32481	243.91	277.39	680.38	5950.9	4126.4	3039.91
2005-04-04	13513.4	1100.2	867.23	982.5	11667.5	6604.42	1202.97	2157.8	3244.25	656.34	6019.93	10421.1	9630.9	26407	1991.07	1392.51	12593.4	7137.53	1176.12	1462.8	366.91	2677.68	3129.52	4052.32	4896.7	4341.39	9206	32355	243.18	281.05	688.74	5903.2	4109.2	3046.73
2005-04-05	13513.4	1096.53	869.81	982.5	11774.3	6550.29	1191.74	2157.81	3244.93	663.24	6019.93	10458.5	9619.07	26038	1999.32	1411.28	12300.7	7170.9	1181.39	1475.88	369.07	2700.17	3145.25	4087.94	4942.9	4362.61	9298.1	32385	244.81	280.63	691.52	5947.4	4117.2	3048.63
2005-04-06	13562.3	1103.29	861.75	988	11827.2	6606.41	1214.87	2165.78	3312.64	668.5	6013.49	10486	9673.01	25695	1999.14	1423.3	12170.9	7191.18	1184.07	1480.68	371.17	2705.5	3174.55	4106.99	4947.4	4379.18	9382.1	32508	246.03	281.87	708.34	6002.4	4106.2	3063.74
2005-04-07	13602.4	1111.62	861.52	988.9	11811	6545.64	1225.49	2176.39	3343.77	672.76	5971.76	10546.3	9625.35	26308	2018.79	1423.47	12471	7227.08	1191.14	1477.69	372.79	2700.8	3177.2	4124.37	4977	4389.52	9392.4	32856	245.83	284.61	710.75	6023.7	4112.4	3055.42
2005-04-08	13666.7	1111.23	864.02	992.17	11874.8	6479.54	1248.52	2181.94	3397.32	672.76	6024.07	10461.3	9623.71	25885	1999.35	1415.33	12531.6	7181.5	1181.2	1467.59	373.61	2711.11	3182.23	4124.29	4983.6	4400.68	9385.8	32812	246.67	284.89	719.74	6016.6	4148.5	3057.63
2005-04-11	13659.9	1105.98	869.93	985.94	11745.6	6397.52	1240.97	2181.58	3357.03	680.15	5979.42	10448.6	9643.71	25900	1992.12	1408.42	12425.4	7189.42	1181.21	1467.59	372.33	2706.7	3185.43	4117.62	4973.2	4396.09	9334.8	32852	246.98	282.63	701.61	6014.7	4115.8	3051.29
2005-04-12	13658	1110.88	866.24	981.79	11670.3	6464.61	1219.51	2173.56	3310.81	679.34	5993.89	10508	9629.02	26206	2005.4	1372.59	12522.2	7208.04	1187.76	1466.65	370.31	2711.45	3175.78	4096.81	4946.2	4372.12	9303.1	32669	245.87	283.77	698.18	5988.1	4123.4	3048.02
2005-04-13	13799.6	1116.67	874.23	981.31	11637.5	6467.92	1248.2	2174.09	3371.49	680.6	5998.08	10403.9	9492.12	26066	1974.37	1344.56	12424.4	7133.99	1173.79	1458.5	370.68	2730.33	3197.29	4116.85	4960.8	4405.69	9373.9	32698	247.1	283.34	705.84	6012.3	4115	3051.66
2005-04-14	13772.4	1108.44	877.23	953.92	11563.2	6467.92	1234.33	2168.59	3324.93	680.73	5976.68	10278.8	9409.61	24984	1946.71	1325.84	12233.2	7063.74	1162.05	1444.5	368.9	2705.33	3170.51	4111.11	4945.4	4402.05	9364.5	32587	247.97	282.06	692.92	6030.5	4063.3	3040.84
2005-04-15	13638.8	1096.52	874.25	947.22	11370.7	6248.34	1216.96	2150.23	3304.3	680.73	5888.37	10087.5	9277.12	24656	1908.15	1276.48	11942.7	6958.35	1142.62	1425.38	364.26	2659.39	3141.89	4032.28	4891.6	4312.25	9155.2	31816	244.12	277.07	688.9	6019	3993.4	3010.79
2005-04-18	13355.2	1060.19	866.66	925	10938.4	6156.78	1197.73	2107.67	3261.32	672.57	5715.16	10071.2	9330.99	24877	1912.92	1307.9	11740	6969.09	1145.98	1421.15	355.88	2576.97	3064.13	3949.59	4827.1	4202.2	9025.8	31052	240.36	268.16	674.96	5925.4	3936.5	2952.77
2005-04-19	13444.1	1062.69	867.77	932.45	11065.9	6134.86	1199.9	2128.71	3267.54	674.96	5748.35	10127.4	9415.7	25566	1932.36	1344.61	12011.5	7030.74	1152.78	1442.27	356.65	2586.65	3090.35	3962.39	4855.6	4204.61	9046.2	31087	241	270.86	673.05	5977.9	3996.4	2969.91
2005-04-20	13501.6	1070.95	871.91	937.36	11088.6	6243.74	1184.19	2129.25	3222.53	673.84	5693.01	10012.4	9378.11	25062	1913.76	1309.48	11842.7	6937.6	1137.5	1437.25	353.89	2612.49	3068.47	3950.02	4822	4178.62	9016.6	31025	241.21	271.45	675.75	5914.7	4001.9	2969.91
2005-04-21	13597.3	1047.8	871.91	939.14	10984.4	6299.2	1172.56	2137.73	3207.56	675.48	5721.99	10218.6	9405.78	25062	1962.41	1354.73	12063.6	7049.18	1159.95	1449.73	353.26	2614.16	3068.77	3951.02	4819.6	4193.7	9018.7	31161	241.3	272.47	681.74	5903	3988.6	2939.07
2005-04-22	13693.5	1047.8	877.78	940.79	11046	6346.57	1169.19	2136.91	3176.92	675.48	5747.09	10157.7	9367.49	24767	1932.19	1354.68	11995.3	7015.85	1152.12	1449.97	356.18	2633.89	3086.73	3980.18	4849.3	4223.04	9096.4	31325	244.11	275.28	686.72	5912.9	4009.6	2948.4
2005-04-25	13750.2	1019.88	871.98	946.17	11073.8	6377.85	1157.97	2137.39	3160.62	675.1	5758.31	10242.5	9416.12	25232	1950.78	1368.82	12377.1	7071.86	1162.1	1466.78	357.1	2644.46	3102.53	3993.07	4864.9	4246.96	9106.2	31364	243.94	277.46	687.24	5899.9	4009.6	2948.4
2005-04-26	13859.6	1031.77	872.43	944.46	11035.8	6339.98	1165.34	2149.64	3180.18	673.49	5805.25	10151.1	9427.65	25305	1927.44	1352.68	12577.7	7011.21	1151.83	1448.83	356.19	2651.83	3097.86	3993.04	4845.5	4233.76	9083.7	31322	242.18	273.8	685.38	5914	3999.1	2948.4
2005-04-27	13839.6	1032.22	872.45	930.16	11005.4	6278.5	1148.76	2145.34	3163.01	670.23	5778.27	10198.8	9323.52	25242	1930.43	1356.3	12454.7	7010.21	1156.38	1443.59	350.53	2591.36	3042.27	3927.68	4789.4	4189.02	8985	30946	235.24	266.98	675.11	5840.5	3987.5	2958.57
2005-04-28	13909.4	1038.36	873.85	917.73	11008.9	6284.2	1169.12	2140.24	3204.73	676.7	5842.27	10070.4	9275.1	24440	1904.18	1324.75	12255.9	6935.31	1143.22	1432.81	346.95	2577.08	3024.75	3911.45	4790.2	4178.1	8985.4	30841	232.61	263.22	669.18	5850.1	3975.3	2968.33
2005-04-29	13909	1029.61	878.96	911.3	11008.9	6154.44	1159.15	2125.25	3156.67	676.7	5818.07	10192.5	9369.29	24844	1921.65	1348.35	12323	7008.32	1156.85	1439.49	348.2	2566	3039.71	3911.71	4801.7	4184.84	9001.6	30911	233.04	263.22	670.36	5870.8	3943.1	2982.65
2005-05-02	13909	1026.52	878.96	918.42	11002.1	6195.15	1159.15	2125.25	3156.67	688.57	5818.07	10251.7	9430.2	24705	1928.65	1378.76	12425	7043.01	1162.16	1437.84	348.37	2578.26	3048.67	3938.77	4801.7	4224.02	9119.9	31150	234.73	263.22	670.36	5924.6	3969.2	2999.24
2005-05-03	13894	1033.5	892.03	913.82	11002.1	6216.77	1159.15	2137.17	3156.67	686.42	5818.22	10257	9370.96	24716	1933.07	1404.39	12357.9	7032.03	1161.17	1431.51	349.08	2559.16	3046.41	3955.93	4861.2	4245.54	9168.3	31224	234.68	267.9	669.36	5933.7	3943.6	2998.97
2005-05-04	13945	1049.58	903.07	929.35	11002.1	6289.55	1159.15	2149.38	3156.67	690.94	5803.68	10384.6	9473.29	25474	1962.23	1442.13	12643	7124.69	1175.65	1457.27	351.18	2550.83	3066.72	3987.63	4882.5	4264.35	9195.7	31266	234.14	267.37	669.13	6001.9	3905.5	2991.86
2005-05-05	14061.7	1049.58	904.06	929.35	11002.1	6359.65	1159.15	2148.1	3156.67	693.84	5927.5	10340.4	9476.27	25436	1961.8	1438.09	12619.9	7117.29	1172.63	1466.09	354.78	2550.83	3091.79	4019.35	4902.3	4299.51	9235.5	31435	234.14	267.37	671.12	6001.9	3915	2946.96
2005-05-06	14034	1068.28	901.22	940.85	11192.2	6388.48	1159.15	2161.22	3156.67	693.84	5967.96	10345.4	9522.74	25589	1967.35	1429.37	12615.8	7110.08	1171.35	1468.97	356.65	2538.15	3098.33	4033.46	4918.9	4311.06	9263.1	31412	236.95	274.14	670.33	6027.1	3939.8	2922.37
2005-05-09	14085.1	1080.21	901.29	935.2	11171.3	6481.35	1130.84	2166.29	3031.49	696.6	5966.85	10384.3	9561.2	25465	1979.67	1406.85	12563	7144.6	1178.84	1471.14	355.93	2582.38	3083.71	4020.19	4910.3	4292.41	9223.5	31345	237.49	275.9	670.33	6002.9	3956.8	2900.78
2005-05-10	14018.4	1071.16	902.84	934.28	11159.5	6454.71	1135.56	2165.85	3067.98	696.45	5949.8	10281.1	9493.59	24763	1962.77	1381.34	12497.4	7066.81	1166.22	1466.8	354.04	2588.52	3066.43	4000.25	4892.4	4251.13	9146.1	31036	236.33	275.25	670.33	5917.5	3949.1	2901.64
2005-05-11	13939.8	1057.08	898.7	923.38	11120.7	6445.13	1124.27	2173.14	3000.6	696.45	5917.13	10300.2	9446.42	24699	1971.55	1400.46	12464.8	7079.86	1171.11	1462.08	352.78	2594.39	3061.75	3979.53	4875.4	4244.16	9149.9	31116	235.34	275.47	662.84	5919.9	3958.6	2913.75
2005-05-12	13968.3	1063.83	893.4	921.21	11077.9	6456.82	1103.99	2181.19	2930.79	696.45	5934.6	10189.5	9331.7	24117	1963.88	1389.8	12448.7	6989.64	1159.36	1446.4	354.92	2603.75	3055.43	4015.65	4893.2	4267.05	9213.1	31337	237.77	275	648.8	5948.7	3979.2	2940.72
2005-05-13	13866.8	1059.27	891.36	923.19	11049.1	6451.54	1107.63	2171.67	2921.5	696.45	5981.48	10140.1	9278.45	23887	1976.78	1439.61	12347.7	6937.69	1154.05	1435.44	355.51	2594.58	3037.28	4017.89	4886.5	4275.7	9222.5	31373	238.86	270.09	639.9	5943	3965.5	2942.64
2005-05-14	13866.8	1059.27	891.36	923.19	11049.1	6451.54	1107.63	2171.67	2921.5	696.45	5981.48	10140.1	9278.45	23887	1976.78	1439.61	12347.7	6937.69	1154.05	1435.44	355.51	2594.58	3037.28	4017.89	4886.5	4275.7	9222.5	31373	238.86	270.09	642.48	5943	3965.5	2942.64
2005-05-16	13866.8	1048.79	889.27	929.04	10947.2	6528.03	1095.47	2165.48	2889.01	697.41	5925.88	10252.3	9323.28	24379	1994.43	1458.18	12442.3	6996.13	1165.69	1432.37	354.84	2594.58	3029.47	4010.98	4884.2	4262.18	9217.7	31333	238.89	270.09	633.69	5943	3923.8	2955.89
2005-05-17	13667	1045.77	891.39	927.16	10825.4	6466	1099.64	2154.37	2903.99	698.83	5894.01	10331.9	9371.4	24413	2004.15	1444.73	12439.5	7034.64	1173.8	1437.2	355.35	2575.42	3021.28	4006.19	4898.5	4251.77	9213.3	31060	239.49	270.09	637.71	5945.1	3911.7	2966.87
2005-05-18	13627	1040.26	886.37	930.36	10835.4	6447	1102.97	2153.65	2883.77	693.42	5890.83	10464.5	9407.84	24898	2030.65	1459.33	12727.7	7113.12	1185.56	1450.14	360.99	2609.42	3054.44	4073.15	4949.4	4324.6	9364.2	31567	241.32	272.87	647.38	5996.9	3940.5	2963.38
2005-05-19	13698.9	1045.46	887.47	952.09	11077.2	6478.94	1103.48	2167.27	2898.29	692.44	5970.71	10493.2	9469.78	24829	2042.58	1457.24	12795.3	7140.96	1191.08	1454.56	363.21	2632.33	3073.71	4085.98	4962.7	4360.42	9400.1	31635	242.34	274.26	647.08	6017.8	3993.7	2982.69
2005-05-20	13717.4	1048.11	883.17	952.19	11037.3	6499.5	1099.27	2173.77	2900.83	692.44	5954.69	10471.9	9452.19	24522	2046.42	1435.08	12883.5	7121.02	1189.28	1455.01	363.88	2678.27	3073.52	4096.18	4971.8	4360.68	9368.5	31676	242.23	276.21	646.5	6023.1	3990.8	3000.66
2005-05-23	13699.1	1045.15	883.17	951.05	11158.6	6539.83	1070.84	2173.77	2840.97	680.73	5885.45	10523.6	9452.19	24215	2056.65	1449.63	13029.6	7155.95	1193.86	1461.26	366.07	2680.14	3080.77	4118.37	4989.8	4406.95	9397	31583	242.35	275.45	646.22	6038.6	4024.3	3038.64
2005-05-24	13719.3	1045.15	884.34	951.61	11133.6	6565.37	1073.85	2175.2	2869.58	684.91	5909.1	10503.7	9518.35	24545	2061.62	1458.17	13020.7	7153.98	1194.07	1465.79	365.1	2676.59	3070.86	4102.06	4982.5	4396.64	9372.4	31532	242.73	277.1	669.65	6080	4054.3	3034.65
2005-05-25	13562.1	1049.06	870.1	941.3	11014.4	6597.6	1072.14	2160.47	2869.65	692.12	5888.53	10457.8	9509.52	24478	2050.12	1458.17	13057.8	7129.24	1190.01	1458.14	366.04	2692.54	3076.14	4100.27	4971.5	4389.54	9351.3	31564	242.48	277.57	669.24	6095.1	4047.3	3037.97
2005-05-26	13570	1054.36	867.1	943.91	11027.9	6670.78	1058.87	2152.56	2839.55	699.6	5939.42	10537.6	9579.04	24478	2071.24	1447.06	13152.6	7164.47	1197.62	1464.7	368.26	2692.54	3055.96	4137.28	4994.9	4436.6	9417.9	31765	244.63	281.42	670.65	6138.2	4050.4	3037.97
2005-05-27	13714.8	1061.49	869.11	960.91	11192.3	6707.72	1051.95	2154.7	2806.11	699.6	5991.55	10542.5	9619.36	25255	2075.73	1460.72	13131.4	7184.9	1198.78	1474.82	366.94	2760.77	3047.2	4131.83	4986.3	4444.71	9381.5	31703	244.95	282.39	671.4	6160.8	4073.9	3027.22
2005-05-30	13845.1	1062.96	869.96	969.04	11266.3	6663.55	1060.16	2171.92	2794.2	699.47	6009.52	10542.5	9673.2	25424	2075.73	1497.84	13161.8	7184.9	1198.78	1474.82	368.42	2785.1	3056.2	4134.87	4986.3	4480.43	9466.8	31878	245.78	283.79	666.79	6158.7	4089.5	3042.77
2005-05-31	13867.1	1088.17	860.73	970.21	11276.6	6715.11	1060.74	2161.77	2801.66	699.3	6011.56	10467.5	9607.29	25207	2068.22	1485.55	12964.4	7134.33	1191.5	1472.58	364.68	2791.39	3051.67	4120.73	4964	4460.63	9427.1	31739	245.48	281.42	674.44	6127.2	4070.4	3034.35
2005-06-01	13873.1	1082.94	861.96	969.51	11329.7	6729.9	1039.19	2176.93	2716.78	699.09	5971.62	10549.9	9654.16	25949	2087.86	1516.17	13143.6	7190.65	1202.22	1488.77	371.52	2830.89	3073.95	4178.25	5011	4527.17	9550.8	32111	246.16	285.31	667.13	6210.3	4103.7	2996.06
2005-06-02	13814.6	1091.46	862.4	970.88	11280	6655.56	1016.06	2191.55	2630.61	702.23	6039.48	10553.5	9626.64	26640	2097.8	1531.17	13284.9	7206.08	1204.29	1496.68	372.4	2832.26	3075.01	4183.72	5005	4532.17	9539.7	32139	244.73	286.97	676.28	6228.7	4136.4	3035.03
2005-06-03	13818.5	1092.5	865.88	976.09	11300	6748.85	1013.64	2192.67	2627.02	702.23	6107.95	10461	9671.17	26366	2071.43	1506.12	13204.4	7169.21	1196.02	1502.8	371.52	2822.69	3083.54	4162.47	4999.4	4510.39	9497.7	31958	244.09	286.97	676.17	6210.3	4149.3	3060.98
2005-06-06	13860.5	1096.83	871.97	976.09	11270.6	6758.19	1034.38	2201.38	2729.2	701.95	6137.57	10467	9671.17	25556	2075.76	1486.07	13208.4	7184.49	1197.51	1502.8	368.77	2834.25	3062.37	4146.47	4980.4	4497.26	9449.4	31859	244.09	286.97	676.18	6186	4154.6	3060.98
2005-06-07	13837.3	1092.81	876.92	970.88	11217.5	6781.25	1030.94	2206.84	2709.48	704.52	6105.79	10483.1	9671.17	25026	2067.16	1490.3	13148	7199.32	1197.26	1502.8	372.46	2829.92	3071.17	4180.74	5025.2	4566.01	9535.5	32153	245.93	286.97	673.03	6237.4	4160.1	3068.37
2005-06-08	13898.5	1095.51	879.44	976.22	11281	6858.24	1115.58	2198.29	2936.57	706.29	6161.66	10476.9	9671.17	24702	2060.18	1489.29	13102.7	7180.57	1194.67	1502.8	372.8	2847.78	3060.29	4171.35	5003.7	4557.29	9487.7	32192	247.1	286.97	671.91	6236.7	4173.3	3080.81
2005-06-09	13898.3	1094.19	879.4	987.58	11160.9	6832.53	1131.05	2198.56	2951.14	700.41	6145.92	10503	9763.44	24484	2076.91	1450.96	13225.3	7212.13	1200.93	1531.35	373.35	2870.84	3082.06	4153.71	5009.2	4562.75	9494	32278	246.71	293.02	673.72	6244.7	4168.9	3091.22
2005-06-10	13934.8	1096.93	890.02	990.79	11304.2	6781.99	1108.29	2220.43	2882.27	700.41	6192.35	10512.6	9790.09	24951	2063	1435.3	13214.6	7200.11	1198.11	1527.79	376.09	2910.96	3100.4	4184.1	5030.4	4586.1	9561.5	32378	248.35	297.39	676.78	6239.4	4180	3079.22
2005-06-13	13952	1100.88	894.68	990.49	11311.5	6832.68	1106.29	2218.86	2879.77	700.41	6231.05	10522.6	9839.94	24902	2068.96	1421.25	13299.6	7213.02	1200.82	1534.26	377.45	2914.72	3101.08	4203.49	5050.4	4599.21	9579.2	32603	249.18	296.28	676.78	6266.2	4180	3089.23
2005-06-14	13904.8	1105.89	892.64	983.75	11335.9	6860.18	1093.46	2202.19	2853.52	696.02	6205.76	10547.6	9822.85	25744	2069.04	1435.28	13343.1	7235.14	1203.91	1535.14	377.69	2930.77	3109.36	4197.74	5046.8	4591.69	9614.4	32663	251	299.63	685.23	6268.4	4189.6	3116.23
2005-06-15	13914.3	1119.58	900.3	1001.94	11415.9	6906.98	1072.84	2201.91	2795.06	686.37	6252.1	10566.4	9866.57	25481	2074.92	1453.66	13501.5	7256.39	1206.58	1550.55	375.82	2947.98	3109.4	4184.36	5019.5	4548.42	9563.6	32622	250	299.01	681.51	6257.1	4203.8	3139.2
2005-06-16	13833.5	1125.76	898.04	1003.14	11416.4	6900.41	1086.01	2202.74	2823.81	683.07	6282.41	10578.6	9968.7	25751	2089.15	1458.7	13537.3	7289.76	1210.96	1546.01	378.95	2985.85	3128.58	4185.15	5045	4579.87	9624.7	32732	251.32	300.99	679.35	6257.8	4221.3	3163.25
2005-06-17	13912	1141.82	897.06	1003.68	11514	6906.52	1085.61	2209.15	2790.65	683.07	6293.56	10623.1	9947.57	26093	2090.11	1443.99	13646	7346.32	1216.96	1545.96	380.27	3020.66	3109.89	4220.91	5077.6	4604.57	9682.3	32758	251.36	303.35	685.41	6263.5	4267.3	3181.01
2005-06-20	13945.8	1147.71	896.75	994.65	11483.4	6984.55	1115.62	2197.38	2868.04	662.04	6296.89	10609.1	9998.11	26046	2088.13	1443.99	13709.4	7325.69	1216.1	1549.44	379.05	3030.23	3092.62	4193.4	5072	4586.86	9659.5	32281	252.06	303.86	690.23	6236.8	4262.3	3168.05
2005-06-21	13979.4	1133.33	896.31	989.99	11488.7	7076.52	1101.49	2196.64	2829.62	672.51	6278.46	10599.7	9939.2	25722	2091.07	1462.09	13548	7314.25	1213.61	1542.68	381.39	3029.89	3116.31	4222.02	5082.1	4608.11	9712.5	32419	253.88	303.63	690.04	6294.1	4255.3	3179.19
2005-06-22	14161	1134.69	903.33	1002.15	11547.3	7145.34	1102.03	2206.34	2842.46	672.47	6357.83	10587.9	10051.5	25678	2092.03	1464.8	13441.6	7320.09	1213.88	1548.03	382.36	3006.68	3137.83	4229.55	5099.3	4619.6	9726.2	32385	254.27	302.83	695.94	6286.9	4232.1	3177.68
2005-06-23	14190.4	1137.42	902.31	1010.8	11576.8	7119.76	1093.7	2223.45	2839.51	663.33	6373.86	10421.4	9998.37	24816	2070.66	1439.43	13389.7	7246.55	1200.73	1536.71	383.2	2993.66	3132.58	4240.18	5114.4	4627.48	9769.6	32390	256.63	306.56	702.28	6273.7	4225.6	3173.03
2005-06-24	14230.3	1135.67	898.08	1002.43	11537	7148.62	1101.88	2223.72	2848.34	663.33	6340.69	10297.8	9996.17	24917	2053.27	1444.61	13299.3	7209.06	1191.57	1531.52	379.97	2965.48	3109.41	4199.87	5079	4566.48	9677.4	32057	256.63	309.79	701.98	6223.2	4203.8	3137.67
2005-06-27	14176	1119.9	891.23	991.11	11414.3	7151.08	1124.64	2206.71	2914.97	650.47	6302.99	10290.8	9998.09	25226	2045.2	1421.25	13454.7	7210.32	1190.69	1535.31	377.27	2972.84	3075.48	4157.68	5043.5	4523.82	9622.9	31734	251.51	307.4	700	6191.1	4191.2	3163.99
2005-06-28	14287.4	1119.9	894.67	994.74	11513.8	7049	1108.59	2197.61	2870.24	652.46	6316.84	10405.6	10041	25261	2069.89	1419.64	13523.1	7267.92	1201.57	1534.34	381.84	3017.48	3084.48	4194.33	5090.4	4557.46	9682.5	32038	253.19	312.03	698.93	6208.6	4222	3191.19
2005-06-29	14277.3	1126.86	889.98	999.08	11577.4	7119.88	1104.99	2202.27	2847.8	659.59	6231.65	10374.5	10029.3	25126	2068.89	1374.55	13550.1	7262.31	1199.85	1540.56	383.34	3028.04	3112.09	4231.88	5109.1	4583.63	9769.2	32185	255.04	312.7	698.4	6261.2	4216.6	3212.8
2005-06-30	14201.1	1122.38	888.32	1008.16	11584	7193.85	1080.94	2212.66	2760.23	656.48	6241.94	10275	9902.77	25051	2056.96	1367.41	13486.1	7217.78	1191.33	1544.41	383.83	3049.91	3112.83	4229.35	5113.2	4586.28	9783.2	32343	255.6	314.17	706.38	6253.1	4229.9	3246.49
2005-07-01	14201.1	1138.99	894.02	1018.02	11630.1	7210.77	1055.59	2209.95	2728.72	656.48	6272.14	10303.4	9902.77	25311	2057.37	1361.32	13509.1	7245.59	1194.44	1554.74	388.26	3089.39	3125.38	4269.62	5161	4617.07	9829.1	32532	257.56	316.84	717.87	6279.8	4224.1	3235.35
2005-07-04	14177.9	1138.88	898.69	1021.71	11651.5	7277.31	1047.28	2221.16	2737.22	662.36	6271.2	10303.4	9941.79	25045	2057.37	1366.92	13500.8	7245.59	1194.44	1554.74	389.84	3071.59	3126.65	4264.6	5184.3	4623.41	9815	32650	258.44	322.24	720.51	6283.6	4234.7	3235.35
2005-07-05	14124.8	1131.17	898.87	1018.81	11616.7	7220.25	1039.04	2222.61	2716.56	652.78	6232.04	10371.8	10075.1	24675	2078.75	1382.08	13648.5	7289.67	1204.99	1548.18	389.11	3099.53	3113.26	4252.75	5190.1	4603.65	9807.4	32553	258.269	321.77	719.21	6282.8	4253.6	3235.35
2005-07-06	14149.9	1117.81	902.69	1019.01	11603.5	7287.6	1033.55	2234.13	2696.5	656.87	6222.05	10270.7	10111.9	24517	2068.65	1356.22	13790.1	7251.87	1194.94	1549.28	390.33	3084.21	3121.92	4279.95	5229.6	4615.49	9832.5	32731	258.779	327.98	740.25	6309	4234.1	3276.75
2005-07-07	14030.8	1108.4	906.96	1026.82	11590.1	7145.13	1038.6	2212.34	2697.94	651.28	6212.6	10302.3	10121	24450	2075.66	1391.1	13850.4	7254.57	1197.87	1546.96	383.8	3065.25	3089.94	4220.62	5158.3	4530.18	9644.4	32185	254.9	320.89	737.35	6250.6	4197.6	3262.28
2005-07-08	13964.5	1110.56	903.61	1021.95	11566	7212.08	1017.98	2215.99	2650.61	651.28	6201.4	10449.1	10177.9	24423	2112.88	1386.77	13871.3	7330.58	1211.86	1561.01	388.6	3095.55	3107.01	4300.31	5232.2	4597.97	9793.2	32769	258.899	330.52	749.06	6312.2	4193.8	3257.52
2005-07-11	14157.2	1123.46	909.32	1040.43	11674.8	7306.74	1011.5	2241.19	2651.8	669.94	6298.86	10519.7	10217.7	25016	2135.43	1410.36	13807.3	7382.5	1219.44	1572.36	390.93	3071.65	3135.18	4321.56	5242.4	4663.38	9876.3	32985	262.96	329.03	750.96	6357.2	4226.6	3292.04
2005-07-12	14147	1129.11	915.72	1043.88	11692.1	7303.95	1046.16	2235.59	2742.86	671.58	6358.81	10513.9	10207.9	25536	2143.15	1422.31	13971.7	7411.85	1222.21	1583.78	389.35	3055.41	3121.61	4313.78	5217.2	4653.03	9873.4	32843	262.64	327.22	751.78	6328.7	4225.1	3307.67
2005-07-13	14307.3	1132.79	913.07	1050.16	11659.8	7247.91	1037.39	2239.01	2734.37	673.55	6377.09	10557.4	10203.6	25856	2144.11	1423.36	14005.2	7400.83	1223.29	1562.37	391.91	3069.8	3137.56	4343.62	5245.9	4679.89	9937.8	33124	264.52	328.64	758.06	6393.8	4240.2	3323.68
2005-07-14	14491.5	1136.57	921.06	1061.93	11764.3	7187.7	1040.42	2250.16	2738	686.75	6418.35	10628.9	10124.9	25920	2152.82	1466.57	14085.1	7403.4	1226.5	1537.84	393.72	3092.43	3170.01	4370.88	5259.7	4699.27	9965.2	33316	264.51	328.93	755.29	6449.2	4257.7	3321.23
2005-07-15	14504.3	1131.46	916.84	1059.6	11758.7	7271.54	1026.12	2250.29	2716.67	686.75	6410.59	10640.8	10149	25222	2156.78	1462.94	13952.6	7403.59	1227.92	1539.97	393.68	3068.14	3164.31	4373.77	5230.8	4712.9	9943.8	33164	264.33	324.87	746.17	6459.9	4254.2	3325.27
2005-07-18	14567	1128.44	915.08	1062.43	11758.7	7347.1	1012.1	2248.14	2676.39	671.68	6410.59	10575	10163	25321	2144.87	1473.03	13972.6	7372.44	1221.13	1534.84	392.88	3073.76	3156.43	4363.47	5214.2	4719.57	9961	33228	264.61	323.96	743.01	6464.5	4259.9	3334.1
2005-07-19	14567.7	1132.02	916.78	1075.48	11764.8	7346.63	1014.36	2292.92	2684.76	678.59	6416.34	10646.6	10163	25271	2173.18	1492.18	14167.5	7414.57	1229.35	1534.84	396.96	3089.91	3188.57	4424.25	5201.5	4770.54	10045	33601	265.27	323.96	745.55	6482.1	4239.8	3307.84
2005-07-20	14602.7	1140.66	924.01	1074.4	11789.4	7342.89	1021.05	2309.26	2716.51	688.08	6423.81	10689.1	10329.6	25705	2188.57	1487.81	14306.1	7453.41	1235.2	1539.62	395.58	3071.84	3185.37	4418.39	5215.2	4784.5	10007	33465	263.69	321.98	757.83	6510.7	4263.3	3319.74
2005-07-21	14620.1	1157.51	921.94	1074.65	11786.7	7304.32	1020.63	2311.14	2724.26	692.3	6394.03	10627.8	10317.7	25842	2178.6	1478.99	14271.9	7412.41	1227.04	1536.06	395.93	3056.37	3202.15	4425.66	5221.6	4829.87	10021.5	33474	265.62	321.86	756.84	6492	4302.7	3310.38
2005-07-22	14786.5	1172.24	939.69	1074.22	11695	7423.25	1046.32	2319.34	2782.89	692.3	6380.73	10651.2	10374.8	25391	2179.74	1481.79	14318.5	7447.16	1233.68	1546.54	394.3	3048.5	3186	4415.52	5241.8	4836.9	10018.8	33540	265.85	326.02	770.1	6492.5	4324.2	3316.23
2005-07-25	14794	1169.75	939.84	1089.7	11762.6	7505.6	1045.4	2309.61	2758.67	695.28	6420.45	10596.5	10362.5	24531	2166.74	1453.93	14135.2	7423.25	1229.03	1563.45	394.54	3071.63	3186.98	4422.12	5270.7	4842.7	10017.1	33614	265.11	329.93	779.19	6503.9	4335.6	3329.07
2005-07-26	14769.9	1178	935.74	1090.6	11738	7552.77	1072.81	2321.77	2831.56	694.76	6366.16	10579.8	10367.9	24868	2175.99	1479.65	14067.7	7428.07	1231.16	1556.89	395.55	3062.89	3198.57	4420.78	5256.2	4843.49	10043.3	33630	265.55	330.03	768.13	6521	4338.1	3348.23
2005-07-27	14801.9	1178.11	931.97	1093.03	11835.1	7605.03	1089.91	2333.62	2886.52	700.04	6327.25	10637.1	10500.7	25338	2186.22	1502.93	14173.4	7465.44	1236.79	1566.97	395.1	3080.37	3217.81	4433.13	5263.6	4855.35	10088.7	33658	267.61	329.27	770.57	6560.1	4347.6	3348.23
2005-07-28	14813.3	1186.61	934.38	1104.72	11858.3	7605.03	1086.55	2346.19	2893.59	696.16	6375.64	10705.5	10516.2	26068	2198.44	1511.16	14256.8	7516.78	1243.72	1585.41	394.97	3106.15	3232.77	4462.26	5270.3	4892.5	10128.8	33774	268.39	329.75	779.18	6612.4	4329.1	3356.92
2005-07-29	14881	1182.3	937.39	1111.29	11899.6	7635.42	1083.03	2352.56	2887.57	696.16	6311.98	10640.9	10422.9	26042	2184.83	1507.59	14409.7	7476.66	1234.18	1604.63	395.77	3126.21	3228.01	4451.74	5282.3	4886.5	10115.6	33693	268.51	333.03	778.93	6600.9	4346.7	3359.28
2005-08-01	14978.9	1178.22	938.22	1115.98	11946.9	7669.45	1088.95	2365.72	2890.82	691.47	6307.93	10623.1	10422.9	26298	2195.38	1522.71	14582.5	7502.1	1235.35	1612.87	396.96	3166.2	3234.05	4456.87	5290.8	4890.85	10068.9	33617	268.42	333.22	782.4	6609.4	4337.6	3372.88
2005-08-02	15137.1	1189.33	941.33	1118.83	11940.2	7756.04	1104.04	2377.13	2940.23	710.77	6343.54	10683.7	10621.2	26789	2218.15	1535.51	14677.7	7556.59	1244.12	1629.71	397.98	3166.87	3251.65	4503.33	5327.5	4932.87	10113.9	33931	270.81	337.58	790.63	6672.2	4343.4	3358.66
2005-08-03	15118.5	1192.2	952.59	1117.11	11981.8	7756.47	1107.7	2365.19	2989.4	711.89	6455.57	10697.6	10598.8	26714	2216.81	1508.23	14616	7566.54	1245.04	1636.35	396.92	3204.16	3269.74	4495.48	5332.3	4923.12	10149.7	33896	270.4	340.81	780.94	6658.1	4326.3	3349.06
2005-08-04	15111.5	1185.33	945.23	1111.39	11883.3	7797.08	1102.59	2362.39	2969.31	710.87	6446.01	10610.1	10626.7	26470	2191.32	1526.85	14612.2	7515.18	1235.86	1649.49	394.68	3203.68	3256.46	4458.97	5315.5	4874.06	10074.3	33501	268.79	337.97	794.02	6617.3	4328.5	3354.05
2005-08-05	15051.3	1174.09	943.41	1089.36	11766.5	7754	1128.74	2338.87	3047.33	710.87	6446.01	10558	10550.5	26518	2177.91	1517.9	14463.1	7453.29	1226.42	1630.54	391.31	3183.76	3249.45	4421.7	5314.7	4827.18	10045.4	33335	267.96	337.02	803.22	6607.7	4333.1	3348.67
2005-08-08	15108.9	1158.59	948.02	1086.64	11779	7606.17	1138.88	2348.21	3061.79	695.46	6380.03	10536.9	10614.4	26711	2164.39	1494	14596.8	7452.71	1223.13	1630.51	391.43	3185.94	3253.56	4441.01	5344.3	4837.86	10115.5	33547	268.09	342.03	810	6634.3	4365.2	3343.4
2005-08-09	15047.8	1162.8	944.94	1099.77	11900.3	7595.57	1152.53	2348.21	3062.84	693.59	6380	10615.7	10585.9	27291	2174.19	1504.04	14673.3	7505.58	1231.38	1631.6	395.88	3220.28	3300.63	4491.69	5363.7	4909.48	10145.6	33753	268.94	345.25	813.19	6638.9	4374.5	3339.7
2005-08-10	15346.4	1176.84	939.48	1104.86	12098.1	7729.82	1165.03	2338.49	3062.94	699.99	6356.84	10594.4	10671.4	27117	2157.81	1509.23	14702.6	7528.39	1229.13	1640.53	401.57	3260.66	3314.81	4527.11	5377.5	4990.57	10229.2	34027	271.94	345.4	815.13	6689.2	4384.8	3324.3
2005-08-11	15445.2	1167.97	936.05	1123.77	12263.3	7816.51	1183.58	2305.97	3128.42	697.22	6353.71	10685.9	10699.9	26633	2174.55	1496.59	14769	7590.83	1237.81	1644.48	400.15	3238.77	3302.51	4509.1	5358.6	4953.93	10222.1	33922	270.5	347.69	805.13	6680.5	4423.9	3330.42
2005-08-12	15451	1153.97	937.04	1130.22	12261.7	7767.49	1167.92	2303.2	3065.73	697.22	6350.9	10600.3	10683.1	26951	2156.9	1479.33	14673.2	7558.33	1230.39	1637.33	396.06	3235.23	3286.7	4476.48	5345.8	4937.33	10187.2	33783	269.82	347.97	805.7	6647.5	4431.9	3340
2005-08-15	15466.1	1118.27	927.92	1130.22	12256.5	7767.49	1187.01	2279.76	3119.15	708.98	6245.13	10634.4	10650.7	27375	2167.04	1479.33	14842.7	7564.78	1233.87	1633.4	395.66	3235.23	3280.53	4466.58	5344.2	4922.34	10184.9	33783	269.84	349.73	812.3	6636.4	4425.5	3338.05
2005-08-16	15443.6	1113.82	926.49	1116.93	12315.7	7768.24	1177.28	2305.3	3085.49	708.91	6242.4	10513.5	10534.8	27080	2137.06	1470.98	14559.2	7480.16	1219.34	1621.14	394.64	3227.15	3285.01	4444.57	5322.3	4883.81	10139.8	33600	269.77	344.78	836.25	6634.6	4446.3	3356.94
2005-08-17	15449.6	1113.82	926.38	1113.25	12273.1	7859.53	1192.83	2280.23	3097.03	719.64	6241.92	10550.7	10500.7	27416	2145.15	1490.84	14560.3	7461.77	1220.24	1601.86	393.53	3191.29	3279.3	4439.63	5292.7	4871.46	10094.1	33495	268.65	342.18	846.54	6631.4	4429.8	3378.14
2005-08-18	15148.1	1100.3	923.64	1092.71	12307.4	7811.33	1148.04	2282.7	3001.4	726.92	6205.09	10554.9	10391.3	26900	2136.08	1484.66	14620	7433.24	1219.02	1597.3	391.38	3154.65	3252.83	4430.07	5269.3	4851.27	10037.9	33234	268.53	342.5	840.44	6596.4	4410.2	3366.53
2005-08-19	15038.6	1087.95	925.54	1089.88	12291.7	7780.76	1150.18	2286.36	3002.14	726.92	6158.94	10559.2	10502.1	26644	2135.56	1495.42	14678.2	7458.54	1219.71	1602.8	393.97	3179.61	3272.11	4487.9	5312.6	4929.91	10132.9	33724	270.38	348.43	852.7	6636.6	4429.9	3356.58
2005-08-22	15218.6	1076.35	923.97	1116.68	12452.5	7750.6	1158.6	2300.95	3030.41	725.54	6206.65	10569.9	10525.5	27261	2141.41	1532.64	14770.3	7486.54	1221.73	1603.85	394.67	3210.98	3270.91	4485.94	5318.4	4941.69	10174.8	33733	270.81	353.21	858.49	6623.3	4462.7	3384.7
2005-08-23	14973.9	1066.09	923.79	1115.84	12472.9	7615.99	1149.96	2289.66	2992.37	718.48	6195.18	10519.6	10525.5	26769	2137.25	1525.82	14717.9	7453.78	1217.59	1603.85	391.73	3214.48	3244.45	4436.56	5300.2	4917.74	10104.1	33428	268.6	353.21	861.41	6565.3	4451.6	3387.41
2005-08-24	14873.9	1035.44	926.08	1094.21	12502.3	7612	1167.14	2278.35	2996.65	710.82	6127.24	10434.9	10509.7	26712	2128.91	1535.99	14603	7417.42	1209.59	1618.68	389.86	3195.94	3234.49	4424.43	5275.2	4915.95	10078.9	33647	265.55	350.78	863.53	6537	4417	3376.26
2005-08-25	14889.1	1061.85	919.85	1097.29	12405.2	7660.42	1172.48	2284.4	2973.82	707.56	6109.66	10450.6	10538.9	27402	2134.37	1573.08	14604.6	7434.58	1212.37	1627.72	386.93	3236.56	3228.47	4378.51	5255.7	4856.01	9983.2	33396	262.5	350.69	864.95	6485	4393.6	3365.54
2005-08-26	14982.9	1048.87	918.38	1086.55	12439.5	7680.22	1171.86	2286.55	2952.73	707.56	6136.55	10397.3	10484.1	27095	2120.77	1564.76	14444.8	7379.86	1205.1	1617.36	385.15	3226.2	3205.13	4342.7	5228.1	4783.8	9904.8	33073	261.029	351.38	873.01	6445.4	4419.1	3332.97
2005-08-29	14837	994.77	911.85	1063.16	12309.8	7634.43	1154.43	2272	2912.06	709.38	6049.44	10463	10558.4	27385	2137.65	1584	14327.2	7413.98	1212.28	1620.45	385.65	3248.38	3206.68	4361.27	5228.1	4812.24	9938.5	33207	262.69	353.27	876.05	6463.7	4368.5	3329.26
2005-08-30	14922.2	1039.82	913.56	1072.61	12453.1	7745	1146.39	2268.49	2909.81	716.64	6032.12	10412.8	10558.4	27604	2129.76	1589.42	14008.2	7397.06	1208.41	1620.45	386.08	3261.31	3211.24	4356.66	5255.8	4791.72	9922.3	33144	262.32	353.27	880.87	6473.2	4407.4	3351.62
2005-08-31	14903.5	1050.09	913.56	1083.33	12413.6	7805.43	1162.8	2275.43	2950.43	715.07	6033.47	10481.6	10668.9	28045	2152.09	1581.65	14243.2	7496.09	1220.33	1655.95	389.6	3285.23	3223.98	4399.36	5296.9	4829.69	10008.9	33520	265.34	357.74	882.03	6517.2	4413.5	3353.11
2005-09-01	15143.8	1039.23	909.67	1106.37	12507	7876.15	1184.93	2295.54	3003.87	726.1	6033.47	10459.6	10813.3	27962	2147.9	1612.94	14486.6	7543.85	1221.59	1681.35	389.88	3311.13	3228.5	4424.15	5328.5	4842.94	10134.1	33684	266.09	361.79	894.57	6553.6	4460.1	3367.77
2005-09-02	15221.9	1039.23	909.18	1115.83	12600	7899.77	1188.85	2300.89	3012.15	726.1	6116.05	10447.4	10771.9	28319	2141.07	1592.68	14772.7	7531.13	1218.02	1680.04	389.31	3333.95	3221.81	4404.95	5326.8	4837.81	10145	33667	266.45	360.47	909.88	6532.1	4435.9	3379.9
2005-09-05	15227.8	1035.89	909.74	1114.5	12634.9	7925.24	1196.22	2293.97	3016.22	733.84	6116.05	10447.4	10771.9	28522	2141.07	1610.29	14857.3	7531.13	1218.02	1680.04	391.46	3314.7	3236.62	4430.09	5337.8	4909.89	10250.9	33805	267.47	360.47	910.14	6543.4	4417.2	3373.72
2005-09-06	15160.8	1051.59	911.64	1122.65	12599.4	7946.78	1173.32	2289.37	2978.17	732.55	6140.14	10589.2	10798.1	28855	2166.86	1607.41	15030.6	7618.96	1233.39	1686.21	394.15	3307.15	3251.19	4472.55	5359.2	4968.28	10373.2	33987	268.89	362.54	882.58	6609.8	4422.3	3362.18
2005-09-07	15224.6	1059.38	919.07	1142.99	12607.6	7946.78	1194.31	2296.9	3025.69	729.98	6141.14	10633.5	10810	28855	2172.03	1608.03	15246.2	7625.24	1236.36	1690.8	394.3	3329.51	3257.77	4486.19	5365.9	4988.14	10408	34092	270.05	360.44	866.57	6684.7	4456.3	3366.91
2005-09-08	15166.2	1080.45	916.8	1145.26	12533.9	8052.56	1194.41	2297.9	3035.28	729.64	6149.88	10595.9	10777.2	28828	2166.03	1615.58	15055.9	7594.64	1231.67	1696.08	393.92	3335.21	3242.05	4465.94	5340.8	4992.75	10441.2	34166	269.22	357.91	883.14	6681.7	4439.8	3385.42
2005-09-09	15165.8	1098.46	917.92	1152.5	12692	8060.01	1189.63	2301.28	3009.36	729.64	6119.06	10678.6	10898.2	29308	2175.51	1611.47	15212.9	7663.82	1241.48	1718.31	394.91	3364.54	3249.37	4491.68	5359.3	5005.93	10486.6	34233	271.59	360.02	905.89	6703.6	4432.7	3385.99
2005-09-12	15199.8	1105.66	919.07	1158.36	12896.4	8138.42	1188.21	2325.11	2999.22	740.63	6164.98	10682.9	10885.2	29086	2182.83	1587.4	15190.2	7637.51	1240.56	1700.92	395.7	3401.54	3261.93	4491.82	5375.1	4989.98	10494.7	34288	271.86	363.39	903.87	6727.2	4437.5	3367.12
2005-09-13	15070.6	1085.74	915.72	1158.12	12902	8193.96	1207.16	2310.35	3041.64	738.7	6169.08	10597.4	10825.2	28873	2171.75	1589.31	15087.3	7578.25	1231.2	1690.33	393.3	3389.23	3249.93	4453.41	5338	4901.88	10429.8	34074	271.58	359.48	900.16	6696.4	4456.3	3372.87
2005-09-14	15086.6	1058.63	914.74	1170.77	12834.2	8189.48	1217.26	2313.35	3073.57	745.32	6148.7	10558.8	10932.4	29050	2149.33	1618.1	15221.4	7577.29	1227.16	1708.88	393.9	3405.57	3266.34	4470.43	5347.4	4911.17	10459.1	34320	272.92	361.14	896.1	6731.6	4473.6	3405.64
2005-09-15	15041	1050.91	919.65	1169.59	12986.8	8283.76	1217.28	2317.67	3068.95	744.65	6082.56	10558.8	10966.3	29366	2146.15	1629.56	15428.8	7583.14	1227.73	1710.13	394.92	3398.41	3265.48	4479.39	5383.5	4905.98	10475.7	34286	271.88	364.35	906.86	6752.8	4466.4	3415.69
2005-09-16	14983.2	1056.73	921.99	1174.13	12958.7	8380.96	1212.95	2306.38	3061.06	744.65	6031.24	10641.9	10990.6	29816	2160.35	1628.13	15428.8	7646.29	1237.91	1721.32	398.1	3430.29	3275.74	4509.49	5407.9	4986.5	10532.1	34538	272.75	364.88	923.03	6810.3	4499.4	3434.88
2005-09-19	14983.2	1066.59	923.27	1174.13	12958.7	8444.84	1220.63	2298.5	3064.07	739.86	6035.59	10557.6	11024.7	30076	2145.26	1649.95	15656.8	7611.89	1231.02	1729.44	399.16	3420.88	3282.91	4505.68	5429.7	4926.13	10536	34527	273.31	369.93	946.33	6804.1	4499.6	3423.6
2005-09-20	15241.9	1055.59	922.03	1190.93	13148.6	8500.28	1212.62	2307.42	3019.92	740.38	6105.35	10481.5	10903.5	30059	2131.33	1644.19	15563.5	7562.84	1221.34	1722.24	401.41	3426.9	3288.75	4531.8	5416.4	4962.86	10583.4	34555	273.35	371.54	944.99	6835.7	4527.2	3407.76
2005-09-21	15223.6	1044.06	922.57	1196.67	13196.6	8487.14	1187.99	2298.65	2965.56	735.81	6067.34	10378	10957.1	30837	2106.64	1658.95	15734.4	7515.02	1210.2	1731.43	396.48	3399.54	3284.62	4468.06	5369.7	4875.22	10500.3	34419	270.98	372.86	960.5	6761	4501.8	3426.57
2005-09-22	15180	1016.76	923.05	1199.97	13159.4	8221.64	1159.96	2290.68	2905.68	727.3	5972.06	10422	10870.8	30678	2110.78	1652.38	15661.1	7519.86	1214.62	1720.5	393.61	3387.88	3287.07	4448.15	5385.7	4849.01	10536.6	34179	271.79	374.49	966.02	6735.8	4511.5	3405.13
2005-09-23	15144	1012.85	921.89	1175.88	13159.4	8222.59	1151.98	2293.04	2892.85	727.3	5925.54	10419.6	10904.3	31294	2116.84	1658.84	15649.3	7518.9	1215.29	1723.46	394.33	3379.79	3298.14	4477.2	5413.6	4882.58	10631.2	34238	272.32	369.93	965.3	6785.5	4514	3407.79
2005-09-26	15274.3	1034.58	925.13	1206.41	13392.6	8478.91	1155.04	2317.58	2895.72	729.93	5930.2	10443.6	10904.3	31141	2121.46	1663.38	15765.5	7556.45	1215.63	1723.46	399.37	3377.3	3328.17	4566.92	5453.1	4998.16	10724.9	34692	275.88	369.93	954.79	6852.2	4565.3	3412.57
2005-09-27	15189.9	1037.63	927.71	1209.63	13310	8525.52	1133.24	2306.5	2844.83	741.71	5945.05	10456.2	11067.2	30875	2116.42	1668.49	15801.8	7548.65	1215.66	1712.63	398.13	3387.1	3320.74	4546.8	5447.3	4965.88	10678.5	34600	276.3	367.55	984.52	6852	4576.7	3431.93
2005-09-28	15221.5	1027.89	924.5	1228.57	13435.9	8606.03	1131.77	2301.84	2847.56	749.2	5931.38	10473.1	11042.3	31317	2115.4	1687.78	15869.3	7575.1	1216.89	1725.47	401.99	3423.08	3343.65	4599.63	5494.8	5048.74	10801.7	34871	278.75	371.13	988.28	6904.8	4575.2	3449.41
2005-09-29	15431.2	1048.3	924.23	1231.22	13617.2	8650.17	1155.48	2299.29	2884.65	753.59	6009.99	10552.8	11018.5	31209	2141.22	1709.89	15841.8	7632.5	1227.68	1731.37	400.41	3423.85	3324.57	4578.86	5478.2	5021.17	10780.6	34773	278.74	374.18	991.13	6860.4	4617.4	3444.73
2005-09-30	15428.5	1079.28	927.54	1221.01	13574.3	8634.48	1155.61	2305.14	2903.11	753.59	6118.61	10568.7	11011.8	31584	2151.69	1694.83	16120.1	7632.98	1228.81	1736.89	402.99	3457.45	3328.8	4600.02	5477.7	5044.12	10813.9	34775	280.37	373.01	1007.76	6898.9	4592.6	3452.79
2005-10-03	15394.4	1083.41	925.33	1221.01	13525.3	8697.65	1155.61	2301.49	2903.11	753.59	6123.92	10535.5	11081.2	31856	2155.43	1731.33	16051	7626.23	1226.7	1738.76	407.84	3503.85	3353.39	4622.54	5501.5	5082.07	10880.7	34874	282.8	374.47	1038.76	7005.6	4593.2	3458.13
2005-10-04	15382.2	1101.17	924.76	1242.78	13738.8	8799.96	1155.61	2323.77	2903.11	753.59	6142.12	10441.1	10960.6	31284	2139.36	1687.25	15933.4	7558.1	1214.47	1721.65	408.66	3494.26	3373.83	4650.24	5494.4	5138.02	10919.2	34654	282.13	372.35	1045.02	7042.3	4591.5	3468.24
2005-10-05	15161	1104.06	927.51	1227.4	13689.9	8724.47	1155.61	2325.89	2903.11	753.59	6135.01	10317.4	10748	30164	2103.02	1647.37	15720.4	7436.36	1196.39	1684.05	404.96	3439.2	3363.29	4594.11	5427.8	5069.42	10823.1	34136	280.57	365.87	1009.64	7026.4	4496.8	3446.42
2005-10-06	14839.3	1096.38	926.25	1202.49	13359.5	8528.7	1155.61	2289.47	2903.11	757.58	6095.81	10287.1	10748	29227	2084.08	1621.02	15247.6	7399.66	1191.49	1684.05	399.89	3353.11	3339.77	4536.9	5372.4	5017.27	10750.9	33867	277.42	365.87	954.57	6939.2	4401.8	3406
2005-10-07	14847.8	1094.65	925.21	1201.01	13227.7	8491.56	1155.61	2305.24	2903.11	757.58	6081.84	10292.3	10612.1	29973	2090.35	1655.9	15447.6	7435.19	1195.9	1674.9	398.66	3336.7	3329.62	4528.79	5362.3	5007.77	10732.4	33620	277.27	349.09	949.12	6947	4400.1	3400.25
2005-10-10	14898.8	1102.78	928.88	1227.18	13227.7	8483.86	1138.95	2343.39	2858.6	765.55	6081.84	10238.8	10612.1	30277	2078.92	1655.9	15466.4	7385.57	1187.33	1651.07	398.27	3349.71	3331.62	4536.22	5374.5	5022.79	10800.6	33635	278.5	349.01	970.29	6950.9	4427.9	3414.03
2005-10-11	14898.8	1105.63	928.43	1244.27	13556.7	8540.56	1157.19	2355.02	2886.97	764.17	6066.59	10253.2	10620.5	30614	2061.09	1643.96	15445.4	7380.81	1184.87	1652.97	397.9	3351.5	3338.18	4549.68	5380.7	5032.46	10810.2	33602	278.94	351.57	994.88	6965.7	4392.3	3404.85
2005-10-12	14575	1102.98	928.49	1217.06	13463.7	8540.56	1161.85	2320.53	2891.21	764.17	5987.4	10216.9	10620.5	30614	2037.47	1604.56	15103.2	7322.74	1177.68	1652.97	393.7	3349.97	3329.11	4515.05	5342.2	4981.77	10721.8	33403	276.3	351.57	966.87	6919	4429.4	3417.99
2005-10-13	14621.8	1090.54	927.12	1193.44	13449.2	8376.9	1152.61	2320.7	2870.32	764.17	5960.11	10216.6	10620.5	29880	2047.22	1586.09	14924.7	7293.12	1176.84	1652.97	391.37	3242.16	3300.46	4470.13	5265.2	4950.07	10567.1	33066	273.04	351.57	935.15	6868.1	4394.9	3362.96
2005-10-14	14485.9	1096.7	925.59	1190.17	13420.5	8201.73	1139.55	2303.24	2830.76	764.17	5969.07	10287.3	10620.5	29770	2064.83	1603.71	14892.9	7362.59	1186.57	1652.97	394.31	3201.62	3309.26	4482.13	5275	4975.56	10629.3	33214	273.36	351.57	911.17	6871.2	4371.3	3351.62
2005-10-17	14541.4	1090.09	924.27	1176.36	13400.3	8202.62	1131.38	2288.54	2798.98	764.17	5826.27	10348.1	10553.4	30242	2070.3	1613.68	15282.7	7370.84	1190.1	1623.65	394.31	3226.72	3291.96	4489.21	5286.5	4978.83	10629.5	33219	272.67	335.81	915.41	6883.4	4389.9	3358.61
2005-10-18	14597.4	1095.87	922.64	1186.22	13352.2	8122.25	1141.2	2284.16	2794.71	764.17	5830.79	10285.3	10345.1	29068	2056	1589.97	15084.8	7277.91	1178.14	1600.27	393.92	3220.21	3289.45	4461.14	5263.9	4947.18	10529.9	32859	271.91	325.54	918.17	6946	4422.5	3346.85
2005-10-19	14372.8	1075.91	914.17	1153.13	13129.5	7971.06	1134.61	2218.13	2770.63	736.4	5694.16	10414.1	10425.8	29297	2091.24	1601.59	15112	7363.07	1195.76	1616.03	387.06	3155	3238.75	4375.09	5167.8	4845.98	10402.5	32279	267.37	314.67	882.1	6820.4	4345.9	3301.48
2005-10-20	14408.9	1075.4	911.69	1162.23	13190.5	7935.12	1135.95	2226.88	2762.11	751.65	5748	10281.1	10190.7	28344	2068.11	1572.69	14821.1	7234.09	1177.8	1576.79	389.06	3153.98	3255.48	4390.66	5164.1	4864.25	10382.3	32336	267.89	324.37	887.37	6885.4	4345.1	3288.97
2005-10-21	14487.9	1075.96	909.58	1183.48	13200	8068.95	1141.32	2239.36	2775.82	751.65	5738.76	10215.2	10290.9	29176	2082.21	1593.11	14903.4	7254.49	1179.59	1597.99	386.08	3138.35	3239.14	4366.52	5142.1	4838.4	10368.8	32454	266.17	322	887.88	6851.6	4325.2	3240.89
2005-10-24	14402.4	1073.08	904.7	1184.6	13106.2	7920.8	1141.17	2222.83	2789.18	751.65	5717.28	10385	10360.8	29835	2115.83	1623.16	15356.3	7374.53	1199.38	1621.17	389.73	3166.27	3266.08	4421.97	5207.6	4901.79	10534.5	32778	269.29	330.37	908.57	6911.8	4317.3	3240.89
2005-10-25	14424.9	1062.17	904.75	1181.28	13280.6	7991.74	1121.92	2226.46	2744.98	751.65	5721.31	10377.9	10363.7	29498	2109.45	1577.02	15367.9	7361.84	1196.54	1639.33	388.68	3195.2	3265.17	4396.99	5182.1	4872.97	10476.6	32664	271.5	331.45	904.35	6939.7	4350.8	3267.97
2005-10-26	14458.1	1062.18	905.21	1179	13395	7974.69	1097.16	2228.79	2662.79	760.21	5700.72	10345	10283.7	29730	2100.05	1609.78	15666.2	7334.77	1191.38	1631.09	390.71	3195.2	3265.22	4412.7	5227.8	4900.79	10473.4	32827	272.42	337.84	910.42	6972.4	4400.6	3294.32
2005-10-27	14381.1	1063.7	904.46	1166.36	13417.1	7798.49	1097.78	2201.9	2667.63	753.86	5661.18	10230	10245.5	29133	2063.81	1577.67	15437.6	7263.32	1178.9	1623.61	386.09	3190.78	3233.4	4336.41	5182.8	4806.05	10328.6	32114	269.34	333.63	898.48	6919.6	4389.2	3286.96
2005-10-28	14215.8	1058.26	905.79	1140.72	13346.5	7685.64	1080.87	2192.41	2631.52	753.86	5632.97	10402.8	10312.3	29318	2089.88	1602.63	15579.7	7369.55	1198.41	1642.58	385.95	3202.4	3224.31	4326.71	5213.4	4825.64	10339.5	32183	269.2	329.87	910.75	6874.9	4340.5	3270.75
2005-10-31	14386.4	1066.22	910.76	1158.11	13606.5	7892.32	1092.82	2216.77	2662.29	765.37	5764.3	10440.1	10383.3	30194	2120.3	1608.86	15759.7	7433.12	1207.01	1656.62	394.16	3298.74	3264.26	4436.45	5317.3	4929.07	10493.8	32782	274.99	341.67	934.99	7036.6	4412.7	3293.16
2005-11-01	14572.3	1064.95	910.76	1188.95	13867.9	7944.1	1089.95	2216.77	2661.61	766.06	5798.41	10406.8	10390.8	30900	2114.05	1621.48	15922.5	7425.18	1202.76	1652.59	394.62	3298.74	3270.43	4434.75	5344.3	4922.55	10427.2	32742	275.85	338.24	942.11	7100.6	4425	3297.15
2005-11-02	14597.5	1064.95	913.92	1208.38	13894.8	8072.75	1104.79	2255.54	2691.82	766.26	5870.37	10472.7	10585.6	30900	2144.31	1638.95	15896.5	7509.82	1214.76	1681.21	397.12	3315.04	3277.22	4429.65	5358.6	4954.83	10424.5	32937	276.9	340.88	964.35	7117.4	4408.8	3285.58
2005-11-03	14601.6	1064.95	913.92	1217.97	13894.8	8072.75	1095.27	2255.54	2675.57	773.62	5858.01	10522.6	10672.6	31100	2160.22	1683.53	15798	7534.81	1219.94	1694.21	399.91	3333.92	3305.76	4502.02	5431.9	5011	10476.9	33366	280.09	353.12	972.43	7211	4460.9	3323.44
2005-11-04	14585.8	1064.95	913.92	1221.98	14076	8072.75	1100.05	2266.52	2687.02	772.96	5911.74	10530.8	10678.6	30888	2169.43	1672.01	15900.5	7507.56	1220.14	1684.69	399.53	3354.73	3305.89	4498.7	5423.6	4995.24	10412.3	33337	279.78	352.07	972.43	7205	4468.3	3325.66
2005-11-07	14365.8	1064.95	911.53	1218.47	14061.6	8206.83	1100.65	2257.08	2686.28	774.57	5860.39	10586.2	10681.2	30952	2178.24	1646.92	15944.1	7519.42	1222.81	1684.06	401.14	3362.05	3329.81	4503.65	5460.8	5024.2	10420.9	33454	281	350.86	971.64	7253.7	4460.8	3316.45
2005-11-08	14403.2	1064.95	909.1	1226.71	14036.7	8317.8	1110.15	2271.99	2693.3	771.28	5849.63	10539.7	10616.2	30971	2172.07	1615.59	15930.7	7489.72	1218.59	1678.47	402.8	3346.38	3336.58	4503.62	5460.9	5008.83	10440.2	33334	280.3	347.85	971.21	7257.5	4501.2	3324.19
2005-11-09	14597.5	1052.82	906.55	1227.59	14072.2	8308.78	1108.15	2270.33	2703.11	781.6	5971.06	10546.2	10656.5	30666	2175.81	1592.43	15981.2	7500.99	1220.65	1687.9	403.89	3326.41	3337.33	4480.23	5439.8	5011.38	10456.3	33429	280.9	349.64	980.29	7238.5	4476.3	3302
2005-11-10	14633.3	1043.7	901.09	1234.43	14080.9	8308.93	1088.3	2258.25	2660.33	773.27	5988.37	10640.1	10565.3	30725	2196.68	1581.28	16153.1	7530.13	1230.96	1681.89	406.3	3331.97	3362.26	4479.5	5423.5	5015.55	10438.4	33352	281.11	346.03	972.23	7243.1	4492.3	3281.56
2005-11-11	14740.6	1028.98	898.35	1256.12	14155.1	8471.04	1090.2	2266.03	2664.05	773.27	6075.26	10686	10669.4	30511	2202.47	1592.51	16137.1	7561.4	1234.72	1696.58	410.82	3341.74	3390.54	4536.49	5465.1	5090.75	10510.3	33740	284.66	342.4	969.58	7351.3	4516.8	3269.44
2005-11-14	14629.5	1017.73	896.19	1257.63	14116	8494.29	1088.65	2254.15	2633.66	762.83	6083.62	10697.2	10684.7	30219	2200.95	1594.94	16293.5	7549.17	1233.76	1699.73	412.03	3352.39	3388.46	4548.45	5470	5092.43	10504.6	33690	284.82	346	988.97	7313	4547.9	3284.44
2005-11-15	14627.4	1022.08	894.33	1253.86	14091.8	8494.29	1087.51	2240.49	2622.03	758.33	6030.74	10686.4	10684.7	30219	2186.74	1572.84	16193.6	7509.38	1229.01	1699.73	412.61	3350.05	3387.61	4543.15	5439.6	5110.61	10456.3	33739	284.18	343.25	991.22	7322.7	4544.9	3284.44
2005-11-16	14650.5	1025.83	896.8	1267.16	14170.9	8595.92	1095.89	2254.46	2639.5	753.33	6046.2	10674.8	10727	30482	2187.93	1584.58	16310.7	7518.98	1231.21	1689.3	410.77	3349.31	3363.72	4512.13	5430	5081.46	10391.7	33684	284.36	339.22	989.72	7268.5	4560.2	3334.76
2005-11-17	14788	1033.28	894.3	1269.35	14411.8	8649.52	1095.31	2261.49	2643.05	765.53	6020.94	10720.2	10733.1	31087	2220.46	1600.84	16455.4	7601.12	1242.8	1700.84	413.24	3392.85	3363.61	4523.18	5460	5099.72	10445.2	33888	285.43	346.62	1014.37	7329.9	4570.1	3324.62
2005-11-18	14883.3	1054.98	901.72	1272.25	14623.1	8686.65	1117	2293.2	2721.87	765.53	6106.74	10766.3	10722.1	31102	2227.07	1603.75	16545.4	7634.58	1248.27	1702.32	416.24	3401.63	3370.66	4556.23	5498.9	5123.5	10527.1	34030	286.77	346.76	1013.92	7431.4	4610.6	3326.02
2005-11-21	14885.6	1062.46	906.24	1268.8	14680.4	8610.74	1119.94	2282.5	2732.76	760.66	6103.42	10820.3	10817.3	31110	2241.67	1606.96	16767.1	7676.64	1254.85	1715.45	417.55	3391.4	3386.67	4586.38	5497.9	5170.61	10535.1	34150	287.92	348.58	1020.98	7452.3	4598.2	3333.98
2005-11-22	14885.6	1066.29	902.54	1244.5	14708.3	8534.97	1098.66	2278.04	2687.24	762.67	6059.19	10871.4	10892.8	31489	2253.56	1625.73	16866.8	7715.35	1261.23	1726.92	418.52	3418.77	3394.39	4580.81	5517.2	5174.72	10522.9	34203	286.72	354.73	1014.76	7467.7	4569.5	3327.35
2005-11-23	15062.4	1061.08	902.9	1282.02	14708.3	8638.34	1105.75	2296.52	2706.08	774.42	6123.52	10916.1	10919.8	31943	2259.98	1627.38	16713.9	7743.34	1265.61	1725.92	419.79	3463.02	3400.23	4608.65	5531.7	5196.08	10626.7	34411	288.01	352.89	1017.15	7495.1	4562.4	3307.97
2005-11-24	15084.4	1078.18	903.65	1291.71	14742.6	8744.04	1113.37	2306.31	2716.8	774.32	6111.89	10916.1	10919.8	31945	2259.98	1631.47	16750.4	7743.34	1265.61	1725.92	417.84	3474.45	3399.31	4586.84	5511	5187.98	10634.2	34360	287.07	352.89	1029.46	7473.9	4594.9	3316.69
2005-11-25	15081.5	1074.4	904.28	1293.22	14784.3	8853.21	1114.92	2295.73	2725.06	774.32	6128.2	10931.6	11002.6	31920	2263.01	1629.63	16879.4	7747.52	1268.25	1707.72	418.3	3493.34	3421.74	4600.48	5523.8	5194.27	10656.3	34436	287.91	355.24	1034.52	7498.7	4592.5	3324.23
2005-11-28	15100	1081.06	900.14	1293.74	14986.9	8994.94	1110.82	2308.54	2713.49	785.11	6203.84	10890.7	10939.2	31358	2239.37	1556.52	16836.1	7687.42	1257.46	1697.85	417.63	3494.16	3413.7	4575.31	5477.4	5176.59	10618.8	34256	288.42	357.07	1039.8	7427.5	4610.2	3310.44
2005-11-29	15028.8	1082.28	898.63	1279.38	14927.7	8931.16	1096.99	2302.88	2682.11	791.06	6139.51	10888.2	10939.2	31652	2232.71	1533.47	16695	7692.99	1257.48	1697.85	420.33	3496.47	3406.03	4588.73	5491	5199.48	10620.1	34307	288.11	357.07	1034.91	7440.7	4585.3	3302.43
2005-11-30	14937.1	1096.64	896.13	1297.44	14872.1	8788.81	1099.26	2300.25	2676.85	790.55	6203.47	10805.9	10824.1	31917	2232.82	1554.67	16831	7645.28	1249.48	1689.8	418.79	3493.37	3394.14	4567.41	5423.2	5193.4	10557.8	34090	286.06	353.41	1037.26	7407.5	4583.6	3302.43
2005-12-01	15068	1096.37	887.8	1305.98	15130.5	8944.78	1098.75	2310.99	2684.56	790.78	6179.82	10912.6	10999.6	32617	2267.17	1519.86	17133.8	7756.54	1264.67	1709.48	426.17	3547.11	3432.67	4636.46	5486.1	5266.55	10678.7	34585	290.45	360.29	1058.93	7536.9	4532.3	3292.25
2005-12-02	15200.4	1119.42	885.14	1310.12	15421.6	8961.61	1094.29	2332.52	2680.64	796.34	6228.95	10877.5	11005.2	32832	2273.37	1543.68	17151	7760.85	1265.08	1726.45	429.48	3569.99	3458.9	4662.5	5528.1	5307.99	10649.8	34745	292.33	365.04	1073.16	7589.3	4573.8	3297.24
2005-12-05	15158.8	1120.58	885.48	1315.15	15551.3	8823.31	1079.2	2332.61	2643.93	798.11	6348.31	10835	11008.8	32701	2257.64	1560.39	17271.1	7759.24	1262.09	1726.45	428.85	3564.68	3445.61	4650.54	5510.4	5266.86	10532.1	34650	290.65	366.82	1076.02	7584.8	4576.8	3266.94
2005-12-06	14990.6	1123.44	886.47	1321.06	15423.4	8815.53	1087.79	2308.35	2659.02	798.68	6350.52	10856.9	11096.8	33223	2260.76	1558.67	17424.4	7775.85	1263.7	1747.73	432.67	3576.16	3458.51	4677.2	5538.8	5300.85	10539.3	34806	293.32	368.54	1072.34	7612	4568.7	3225.15
2005-12-07	15135	1151.36	891.67	1324.75	15484.7	8895.81	1099.62	2311.81	2676.86	796.65	6329.52	10810.9	11131.4	32757	2252.01	1525.53	17244.2	7731.28	1257.37	1749.92	431.52	3617.44	3464.47	4660.58	5528.8	5266.75	10506.6	34790	293.64	373.48	1083.18	7588.8	4576.3	3227.57
2005-12-08	14879.2	1158.32	896.11	1324.2	15183.4	8906.31	1098.32	2305.71	2691.45	798.7	6249.19	10755.1	11167.2	32480	2246.46	1525.53	17211	7743.43	1255.84	1757.55	432.23	3617.44	3456.4	4669.93	5531.1	5286.75	10495.8	34868	295.22	371.12	1079.48	7560	4531.6	3229.98
2005-12-09	14910.5	1160.07	898.3	1317.42	15404	9067.28	1113.48	2321.1	2724.19	798.7	6264.36	10778.6	11132	32922	2256.73	1535.28	17554.5	7762.6	1259.37	1756.32	431.13	3591.04	3448.05	4661.01	5517.4	5282.13	10489.3	34811	295.69	373.53	1082.4	7567.4	4534.8	3183.31
2005-12-12	14984.4	1175.01	897.01	1333.23	15738.7	9133.67	1116.37	2331.4	2736.92	811.37	6266.29	10767.8	11099.3	32971	2260.95	1521.89	17554.5	7790.99	1260.43	1764.56	432.8	3557.94	3454.8	4673.13	5501.5	5301.21	10540	34886	294.96	372.58	1095.75	7567.5	4562.2	3185.28
2005-12-13	14942.6	1182.03	898.27	1336.48	15778.9	9263.9	1117.85	2323.97	2758.77	813.82	6261.18	10823.7	11099.3	33420	2265	1515.42	17819.7	7825	1267.43	1764.56	433.17	3581.28	3457.86	4693.4	5507.2	5310.28	10533.6	34972	295.7	372.58	1094.03	7577.4	4538.7	3196.72
2005-12-14	14976.3	1173.72	898.8	1334.27	15464.6	9241.76	1125.39	2324.38	2789.99	813.89	6235.35	10883.5	11095.8	33629	2262.59	1525.57	18054	7852.18	1272.74	1766.99	430.95	3582	3462.63	4674.85	5521.1	5286.76	10502.4	35002	294.15	377.31	1105.67	7516.3	4567.3	3207.95
2005-12-15	15059	1155.96	894.98	1337.68	15254.4	9170.4	1123.56	2325.73	2777.91	818.84	6258.47	10881.7	11092.8	33193	2260.63	1554.99	17922.5	7815.71	1270.94	1763.25	432.08	3577.87	3443.96	4673.14	5495.3	5295.82	10483.5	35021	293.63	371.87	1101.12	7458	4575.4	3234.67
2005-12-16	15029.8	1143.43	893.37	1321.04	15173.1	9284.46	1127.51	2325.53	2801.64	818.84	6350.69	10875.6	11136.6	33292	2252.48	1524.5	17737.6	7814	1267.32	1760.98	436.17	3586.62	3495.28	4704.41	5531.6	5353.66	10555.3	35286	296.17	368.2	1099.36	7491	4590.9	3281.9
2005-12-19	15182.9	1162.33	895.86	1339.4	15391.5	9394.27	1131.75	2326.55	2793.76	812.3	6431.42	10836.5	11154.3	33005	2222.74	1502.44	17666.4	7778.59	1259.92	1754.05	435.31	3571.39	3501.31	4694.86	5539.8	5350.18	10528.3	35347	296.42	363.5	1103.84	7532.9	4600.8	3317.04
2005-12-20	15169.2	1163.03	896.08	1341	15641.3	9346.24	1136.34	2326.55	2804.8	820.53	6427.84	10805.5	11180.6	33067	2222.42	1489.36	17681	7777.27	1259.62	1751.08	435.46	3586.83	3509.11	4703.48	5547.9	5356.6	10572.3	35538	296.56	368.42	1100.78	7516.7	4616.7	3319.32
2005-12-21	15221.4	1160.56	894.65	1354.16	15957.6	9339.17	1130.76	2332.67	2788.67	829.72	6471.89	10833.7	11247.2	33517	2231.66	1491.27	17781.5	7806.75	1262.79	1753.09	438.99	3586.48	3542.13	4752.41	5587.4	5397.23	10682.7	35803	298.51	369.6	1105.27	7547.5	4659.9	3318.52
2005-12-22	15182.5	1164.02	895.85	1350.87	15941.4	9372.3	1135.24	2323.66	2805.38	831.56	6417.2	10889.4	11255.4	33513	2246.49	1516.24	17768.9	7833.77	1268.12	1765.7	438.45	3625.15	3544.47	4751.96	5597	5398.28	10701.3	35836	299.44	372.1	1128.51	7515.2	4652	3309.66
2005-12-23	15183.6	1158.34	892.13	1359.53	15941.4	9256.91	1144.87	2328.29	2827.19	831.56	6512.63	10883.3	11255.4	33331	2249.42	1529.12	17802.3	7841.9	1268.66	1765.7	439.16	3621.37	3542.36	4757.74	5595.4	5419.05	10723.9	35740	301.58	372.1	1126.09	7497.8	4670.8	3316.11
2005-12-26	15183.6	1158.34	892.13	1367.57	16107.7	9085.89	1156.82	2328.29	2848.3	829.24	6534.77	10883.3	11255.4	33298	2249.42	1550.96	17776.9	7841.9	1268.66	1765.7	439.16	3621.37	3542.36	4757.74	5595.4	5419.05	10723.9	35740	301.58	372.1	1127.28	7497.8	4670.8	3316.11
2005-12-27	15183.6	1161.71	894.51	1373.55	15969.4	9283.16	1154.29	2334.94	2834.22	829.16	6531.59	10777.8	11255.4	33371	2226.89	1533.08	17832.6	7767.85	1256.54	1765.7	440.32	3640.61	3567.3	4769.38	5595.4	5444.84	10772.7	35845	303.63	372.1	1123.91	7548.8	4670.8	3316.11
2005-12-28	15101.5	1164.14	895.55	1368.16	16194.6	9257.51	1157.03	2337.89	2834.6	817.61	6524.4	10796.3	11255.4	33138	2228.94	1537.59	17690.7	7795.76	1258.17	1765.7	439.1	3652.66	3567.21	4756.93	5622.8	5447.15	10769.5	35866	302.59	372.1	1115.92	7559.1	4697.3	3344.79
2005-12-29	15045.6	1162.64	900.49	1379.37	16344.2	9323.25	1169.86	2345.38	2879.97	822.99	6575.53	10784.8	11255.4	33456	2218.16	1543.31	17832.8	7788.14	1254.42	1765.7	440.87	3667.03	3575.19	4772.93	5638.3	5458.58	10778.1	35957	304.41	372.1	1122.21	7620	4715.2	3357.43
2005-12-30	14876.4	1162.64	899.79	1379.37	16111.4	9397.93	1161.06	2347.34	2863.61	822.99	6548.34	10717.5	11272.3	33456	2205.32	1543.31	17802.7	7753.95	1248.29	1759.08	436.78	3667.03	3549.25	4715.23	5618.8	5408.26	10733.9	35704	302.91	376.78	1125.6	7583.9	4708.8	3370.51
2006-01-02	14876.4	1171.71	899.79	1389.27	16111.4	9390.14	1161.06	2347.34	2863.61	847.42	6462.06	10717.5	11272.3	33507	2205.32	1555.67	17925.7	7753.95	1248.29	1759.08	440.52	3682.35	3573.87	4754.92	5618.8	5449.98	10786.7	35962	303.11	377.68	1125.6	7583.9	4708.8	3370.51
2006-01-03	14944.8	1184.69	892.85	1394.87	16111.4	9539.37	1161.06	2369.37	2863.61	850.05	6591.77	10847.4	11441.6	34541	2243.74	1602	18500.7	7912.41	1268.8	1794.99	441.93	3717.42	3603.94	4776.98	5681.5	5460.68	10818.1	36093	304.8	381.86	1125.6	7628.6	4721.1	3370.51
2006-01-04	15200.1	1211.7	897.13	1402.11	16361.5	9648.08	1180.96	2384.14	2948.8	856.42	6616.44	10880.1	11501.5	35002	2263.46	1610.52	18669.2	7962.94	1273.46	1799.93	445	3763.89	3638.46	4838.52	5714.6	5523.62	10895.8	36336	306.5	384.88	1125.6	7723.7	4765.1	3374.46
2006-01-05	15271.1	1211	906.66	1395.51	16425.4	9617.74	1197.27	2403.75	3037.97	822.76	6709.87	10882.1	11501.5	34936	2276.87	1599.91	18608.3	7944.06	1273.48	1799.93	443.13	3772.48	3639.33	4835.09	5691.2	5516.53	10913.6	36085	306.47	384.88	1125.6	7703.3	4757.9	3375.98
2006-01-06	15344.4	1222.25	911.67	1412.78	16428.2	9640.29	1209.42	2420.74	3053.31	822.76	6694.82	10959.3	11620.5	35475	2305.62	1616.29	18736.8	8031.66	1285.45	1804.46	446.11	3772.48	3643.74	4867.15	5731.8	5536.32	10913.6	36365	306.47	386.44	1125.6	7718.5	4736.4	3364.97
2006-01-09	15547.4	1245.05	913.8	1408.33	16428.2	9583.45	1215.67	2425.99	3064.85	831.91	6742.39	11011.9	11565.2	35337	2318.69	1621.12	18998.8	8053.42	1290.15	1809.02	447.88	3815.48	3642.21	4875.09	5731.5	5537.11	10962.5	36227	309.35	388.36	1125.6	7715.6	4775.8	3368.05
2006-01-10	15569.9	1245.05	913.8	1396.29	16124.4	9445.3	1220.62	2425.99	3079.92	826.37	6707.4	11011.6	11597.6	35049	2320.32	1616.41	18912.4	8030.59	1289.69	1814.85	443.9	3788.87	3638.09	4861.93	5688.8	5494.71	10869.9	36147	307.36	385.36	1190.34	7663.7	4761.7	3381.05
2006-01-11	15650.9	1261.28	909.59	1394.09	16363.6	9445.3	1211.05	2418.65	3043.97	837.68	6735.89	11043.4	11621	35952	2331.36	1649.67	19160.4	8063.51	1294.18	1813.07	446.31	3800.02	3663.15	4890.49	5731.5	5532.89	10966.2	36548	308.98	384.71	1216.66	7752.1	4781.1	3381.05
2006-01-12	15719.4	1256.25	911.16	1402.58	16445.2	9380.88	1226.7	2407.38	3084.18	841.46	6725.61	10962.4	11595.2	35779	2316.69	1638.09	18925	8008.09	1286.06	1792.82	447.4	3830.25	3676.23	4890.24	5735.1	5542.13	10955.8	36661	308.37	390.09	1255.92	7798.1	4781.7	3383.41
2006-01-13	15788	1250.43	911.9	1416.28	16455	9374.19	1221.46	2405.86	3045.57	841.46	6682.35	10959.9	11604.8	35897	2317.04	1645.24	18889.2	8025.94	1287.61	1815.46	441.37	3791.8	3672.04	4850.53	5711	5483.09	10850.7	36265	306.12	387.16	1239.76	7802.5	4784.3	3364.74
2006-01-16	15777.7	1235.26	906.53	1421.79	16268	9311.19	1202.87	2401.2	2985.3	857.95	6724.18	10959.9	11721	36534	2317.04	1653.63	18958.3	8025.94	1287.61	1815.46	441.99	3822.22	3691.07	4856.09	5740.2	5514.64	10898.4	36626	307.27	391.84	1276.9	7835.7	4785.9	3351.57
2006-01-17	15576.2	1212.87	907.52	1389.58	15806	9314.13	1208.44	2376.96	3024.55	852.06	6711.04	10896.3	11721	36119	2302.69	1661.59	18489.6	7992.6	1283.03	1815.46	438.51	3799.76	3646.77	4807.14	5699	5460.16	10806.3	36352	304.04	391.84	1253.58	7785.6	4817.3	3348.36
2006-01-18	15481.2	1193.2	901.32	1352.91	15341.2	9237.53	1233.35	2359.3	3123.05	846.9	6498.92	10854.9	11721	35805	2279.64	1645.52	18266	7953.01	1277.93	1815.46	434.21	3770.29	3638.98	4772.09	5663.7	5395.61	10708.1	36024	298.43	391.84	1235.01	7726.5	4739.8	3328.66
2006-01-19	15670.4	1230.06	902.7	1360.64	15696.3	9449.84	1251.58	2378.52	3161.18	858.06	6512.29	10880.7	11693	36858	2301.81	1701.18	18521.5	8018.22	1285.04	1821.38	436.62	3832.03	3674.04	4814.09	5693.2	5430.84	10821.5	36086	300.61	392.87	1278.28	7771.6	4790.9	3358.9
2006-01-20	15662.1	1222.89	905.41	1324.78	15696.7	9520.96	1255.31	2388.91	3153.35	858.06	6486.63	10667.4	11605.7	36695	2247.7	1701.88	18346.2	7902.27	1261.49	1825.27	432.2	3846.97	3656.97	4773.48	5672.4	5349.02	10740.9	35681	299.1	398.32	1304.53	7697.5	4806.1	3341.97
2006-01-23	15464.8	1200.13	902.51	1297.43	15360.6	9464.9	1255.77	2364.97	3154.1	857.04	6381.97	10688.8	11733.4	36632	2248.47	1698.98	18447.1	7953.92	1263.82	1831.82	431.88	3872.43	3651	4751.99	5660.9	5348.72	10712.2	35787	298	393.98	1295.39	7702.7	4766.6	3309.05
2006-01-24	15530.6	1207.22	906.98	1326.83	15648.9	9549.92	1252.06	2368.32	3198.15	859.87	6451.94	10712.2	11692.4	37400	2265.25	1697.92	18875.4	7973.02	1266.86	1826.83	431.51	3881.43	3654.18	4748.32	5633.8	5334.3	10665.6	35652	296.65	397.73	1307.05	7692.6	4779.8	3318.93
2006-01-25	15520.4	1230.12	909.77	1342.59	15651	9685.74	1258.05	2378.64	3242.35	871.98	6532.18	10709.7	11675.2	37400	2260.65	1708.41	18866.4	7969.49	1264.68	1825.85	436.46	3881.57	3682.39	4791	5704.4	5427.09	10824.1	35929	299.1	398.26	1324.65	7682.7	4812	3324.68
2006-01-26	15520.1	1226.65	913.14	1352.75	15891	9685.74	1258.05	2388.22	3242.35	868.33	6532.18	10809.5	11675.2	38014	2283	1724.46	19216.8	8044	1273.83	1825.85	443.63	3896.13	3726.99	4876.52	5722.6	5548.91	10890.2	36487	301.7	398.26	1337.82	7749.4	4812	3328.19
2006-01-27	15753.1	1229.71	914.01	1384.56	16460.7	9870.79	1258.05	2412.08	3242.35	868.33	6532.18	10907.2	11675.2	37822	2304.23	1739.83	18956.5	8096.14	1283.72	1825.85	449.67	3956.26	3760.38	4956.6	5786.8	5647.42	11023.2	36701	306.02	398.26	1373.22	7779.4	4867.3	3341.1
2006-01-30	15753.1	1232.32	914.01	1384.56	16551.2	9849.03	1258.05	2412.08	3242.35	851.32	6532.18	10899.9	11947.5	38242	2306.78	1771.55	18849.2	8105.25	1285.19	1838.89	450.7	4002.64	3756.21	4936.79	5779.8	5660.03	11038	36666	305.99	414.62	1332.27	7789.3	4892.2	3341.68
2006-01-31	15753.1	1232.32	914.01	1399.83	16649.8	9919.89	1258.05	2412.08	3242.35	844.41	6532.18	10864.9	11945.6	38383	2305.82	1793.97	18907.1	8106.55	1280.08	1860.83	450.5	3969.36	3744.63	4947.99	5760.3	5674.15	11104.3	36654	307.27	410.29	1315.96	7810.9	4880.2	3350.65
2006-02-01	15742.3	1240.69	914.01	1375.97	16480.1	9859.26	1258.05	2431.74	3242.35	848.37	6532.18	10954	11952.1	38485	2310.56	1747.15	19162.4	8112.22	1282.46	1855.49	455.7	4035.53	3776.16	4999.39	5801.6	5726.53	11221.1	36967	309.77	415.26	1339.57	7836.2	4903.9	3364.93
2006-02-02	15691.7	1243.39	914.01	1374.44	16710.5	9843.87	1258.05	2441.39	3242.35	849.11	6532.18	10852	11929.9	37304	2281.57	1699.35	19060.4	8038	1270.84	1851.26	450.41	3982.26	3769.26	4927.89	5747.3	5649.6	11136	36472	310.04	412.71	1334.85	7785.9	4855.4	3407.71
2006-02-03	15429.7	1244.13	927.85	1333.5	16659.6	9742.58	1258.05	2431.72	3242.35	848.37	6594.6	10793.6	11937.6	37262	2262.58	1703.33	18862.2	8001.4	1264.03	1850.76	451.27	3953.47	3766.43	4937.56	5759.3	5657.12	11175.8	36408	307.77	408.32	1308.13	7840.8	4832.1	3378.63
2006-02-06	15548.1	1245.65	929.39	1341.64	16747.8	9980.42	1287.63	2441.08	3359.5	833.14	6719.96	10798.3	12080.5	37321	2258.8	1725.78	18862.2	8019.87	1265.02	1864.05	452.52	4017.36	3775.15	4934.59	5772.4	5666.78	11187.5	36862	309.53	416.06	1325.27	7839.6	4859.8	3378.63
2006-02-07	15517	1259.36	923.84	1332.28	16721	10082.3	1282.1	2448.73	3358.69	824.94	6720.08	10749.8	11817.3	36562	2244.96	1695.04	18665.1	7932.5	1254.78	1820.66	453.03	4010.73	3781.31	4935.4	5746.8	5672.92	11175.1	36711	307.51	408.72	1330.64	7837.3	4850.3	3372.46
2006-02-08	15373.4	1238.17	918.92	1310.99	16272.7	10044.8	1290.06	2428.25	3335.68	826.32	6624.11	10858.6	11735.1	36499	2266.98	1717.53	18410.2	7974.91	1265.65	1816.41	452.62	3982.31	3774.97	4895.08	5725.1	5666.41	11202.6	36650	308.22	404.25	1335.19	7831.9	4777	3348.46
2006-02-09	15413.4	1246.64	920.63	1321.66	16439.7	10044.8	1269.45	2431.62	3262.52	830.77	6630.13	10883.4	11709.3	36882	2255.87	1704.83	18518.3	7980.17	1263.78	1831.05	457.87	4032.57	3806.77	4955.74	5808.7	5743.68	11344.9	37058	311.78	408.76	1366.37	7873.6	4820.2	3354.28
2006-02-10	15426	1253.1	920.31	1335.23	16257.8	10111	1282.66	2423.59	3321.91	826.32	6594.92	10919	11651.7	36975	2261.88	1695.48	18298.6	7980	1266.99	1808.88	456.26	4022.48	3793.91	4910.82	5764.1	5701.47	11312.6	36718	309.59	408.41	1365.26	7861.6	4817.7	3347.89
2006-02-13	15312.1	1252.4	922.77	1320.79	15877.7	10173.2	1279.64	2429.5	3307.7	833.59	6562.29	10892.3	11519.5	36114	2239.81	1673.03	17883.6	7947.8	1262.86	1789.86	459.48	3991.17	3785.34	4957.36	5793.5	5756.33	11395.5	36964	310.78	402.55	1365.24	7889.3	4765.1	3348.05
2006-02-14	15420.3	1230.38	925.51	1328.21	16184.9	10086.6	1286.33	2440.98	3334.68	822.76	6612.97	11028.4	11616.4	36627	2262.17	1669.7	18023	8021.57	1275.53	1793.73	460.04	3959.03	3774.16	4961.34	5792.3	5763.4	11395.9	36866	311.94	396.44	1367.91	7882.4	4808.2	3340.43
2006-02-15	15423.3	1236.94	927.17	1303.84	15932.8	10113.2	1299.17	2424.17	3362.15	822.39	6598.49	11059	11557.2	37239	2276.43	1669.17	18169.2	8019.76	1280	1797.11	460.56	3979.15	3770.77	4934.09	5791.5	5764.37	11377.4	36933	312.06	403.26	1375.1	7797.2	4781.5	3323.22
2006-02-16	15450.9	1237.87	928.1	1314.32	16043.7	10124.3	1270.63	2434.66	3277.13	818.76	6683.93	11120.7	11704.3	38256	2294.63	1695.64	18457.2	8086.74	1289.38	1810.06	461.66	4064.14	3782.48	4973.09	5828.9	5789.25	11447.2	37234	314.45	404.71	1381.59	7906.6	4766.9	3303.26
2006-02-17	15475.7	1243.47	926.47	1332.73	15713.5	9981.11	1267.41	2431.34	3295.87	822.76	6673.75	11115.3	11758	38422	2282.36	1699.49	18480.8	8092.42	1287.24	1820.63	463.6	4079.47	3794.57	5000	5846.2	5795.48	11491.3	37401	314.64	408.72	1428.14	7917.1	4748.5	3333.26
2006-02-20	15598.7	1247.41	925.18	1348.25	15437.9	10079.3	1267.54	2431.77	3308.53	813.58	6686.55	11115.3	11865.8	38539	2282.36	1721.14	18542.6	8092.42	1287.24	1820.63	464.64	4133.2	3802.49	4979.94	5863	5793.95	11535.6	37594	315.73	415.83	1459.48	7950.2	4788.1	3369.96
2006-02-21	15627.2	1236.09	925.67	1346.49	15894.9	10168.1	1288.42	2443.56	3359.69	812.46	6631.51	11069.1	11865.8	38166	2262.96	1743.59	18497.4	8082.66	1283.03	1833.27	464.32	4158.59	3835.47	4991.93	5857.7	5801.04	11626.9	37688	318	415.83	1444.35	8002.6	4830.2	3368.43
2006-02-22	15635.7	1231.25	924.4	1340.58	15781.8	10224.3	1284.23	2427.89	3363.03	810.91	6530.7	11137.2	11800.2	38246	2283.17	1728.2	18780.5	8128.2	1292.67	1833.85	466.02	4134.55	3900.1	5041.6	5872.4	5862.06	11755.3	38076	319.57	413.61	1465.62	8040.5	4842.5	3410.03
2006-02-23	15812.5	1224.16	927.51	1361.23	16096.1	10244	1288.85	2435.58	3358.97	806.26	6474.69	11069.2	11738.5	38405	2279.32	1714.13	19117.7	8107.76	1287.79	1828.84	464.59	4146.62	3901.78	5040.39	5836	5857.88	11739	37972	320.06	416.07	1465.62	7983.8	4867.3	3394.4
2006-02-24	15856	1216.14	924.91	1365.82	16101.9	10200.8	1296.87	2453.67	3390.87	810.91	6538.22	11061.9	11810.5	38610	2287.04	1726.65	19100.9	8126.03	1289.43	1840.53	464.57	4135.59	3929.12	5073.95	5860.5	5870.79	11786.9	38121	322.52	422.61	1465.62	7954.3	4849.4	3377.84
2006-02-26	15856	1216.14	924.91	1365.82	16101.9	10200.8	1296.87	2453.67	3390.87	810.91	6538.22	11061.9	11810.5	38610	2287.04	1726.65	19100.9	8126.03	1289.43	1840.53	464.57	4135.59	3929.12	5073.95	5860.5	5870.79	11786.9	38121	322.52	422.61	1516.46	7954.3	4849.4	3377.84
2006-02-27	15949.9	1235.42	928.66	1374.88	16193	10282.1	1297.19	2477.37	3345.44	822.93	6561.63	11097.5	11706.5	38610	2307.18	1736.22	18854.7	8139.67	1294.12	1839.53	467.53	4153.29	3901.68	5080.52	5875.9	5915.15	11832.8	38322	324.32	421.42	1516.99	7995	4880.1	3369.07
2006-02-28	15918.5	1230.66	928.94	1371.59	16205.4	10370.2	1299.03	2481.96	3351.64	823.21	6561.63	10993.4	11688.3	38610	2281.39	1714.05	18706.3	8060.61	1280.66	1847.22	458.72	4068.47	3839.25	5000.45	5791.5	5796.04	11740.7	37650	318.09	416.25	1453.44	7892.6	4878.4	3404.93
2006-03-01	15818.1	1239.27	921.56	1371.59	15964.5	10565.5	1306.59	2482.67	3378.18	829.39	6613.39	11053.5	11794.6	39178	2314.64	1741.87	19058.7	8130.63	1291.24	1878.3	461.7	4049.97	3882.88	5057.61	5844.1	5866.61	11902.2	37809	321.44	420.97	1450.82	7980.4	4813.8	3397.09
2006-03-02	15882.5	1249.68	919.78	1367.7	15909.8	10626.8	1285.67	2480.3	3342.68	832.08	6642.96	11025.5	11906.9	39126	2311.11	1795.22	19102.3	8126.53	1289.14	1887.27	457.26	4009.72	3852.44	5009.09	5833	5783.49	11809.6	37330	321.45	424.01	1466.87	7926.2	4864.4	3407.33
2006-03-03	15802	1261.27	916.93	1328.95	15663.3	10595.4	1293.3	2493.43	3350.42	829.39	6553.66	11021.6	11978.7	39240	2302.6	1823.56	19189.2	8119.91	1287.23	1897.46	455.25	4032.93	3827.17	4989.15	5858.7	5721.46	11755.7	37390	322.8	429.26	1487.11	7916	4862.1	3407.55
2006-03-06	15811.8	1262.69	914.92	1344.76	15901.2	10735.4	1288.96	2512.88	3330.05	842.4	6575.78	10958.6	11883.3	38354	2286.03	1815.8	18991.5	8067.44	1278.26	1890.09	457.86	4064.17	3882.71	5010.72	5897.8	5754.06	11759.1	37721	324.28	426.08	1480.9	7917.2	4867.4	3420.9
2006-03-07	15602.4	1246.25	915.21	1316.67	15726	10725.7	1259.92	2489.15	3233.47	834.85	6494.15	10980.7	11816.5	37423	2268.38	1776.48	18551.1	8017.36	1275.88	1872.59	455.17	3987.06	3850.11	4992.21	5857.4	5739.28	11701.3	37515	321.83	421.97	1396.48	7864.3	4843.6	3458.68
2006-03-08	15493.1	1233.6	913.53	1314.05	15627.5	10508.9	1250.38	2502.6	3199.94	831.29	6459.57	11005.7	11737.1	37289	2267.46	1776.06	18398.8	8026.09	1278.47	1856.94	451.38	3906.58	3852.19	4969.51	5812.9	5673.36	11629.2	37358	319.23	417.52	1396.48	7831.5	4835.7	3449.48
2006-03-09	15510.1	1239.58	920.91	1311.21	16036.9	10573.5	1245.17	2504.25	3184.93	835.45	6486.47	10972.3	11765.3	36312	2249.72	1764.76	18310.6	8007.83	1272.23	1869.69	454.42	3935.44	3864.04	5007.84	5855.9	5732.22	11699.6	37657	321.84	419.92	1361.28	7860.7	4855.4	3462.67
2006-03-10	15445	1247.42	921.96	1320.07	16115.6	10765.2	1245.65	2496.73	3213.51	835.45	6490.68	11076.3	11833.6	36891	2262.04	1762.56	18420.2	8079.24	1281.42	1874.26	458.59	3946.05	3901.67	5069.27	5907.9	5804.92	11771.8	37927	321.91	419.92	1351.26	7970.6	4849.4	3487.72
2006-03-13	15542.1	1243.66	922.03	1338.28	16361.5	10803.7	1259.67	2512.14	3277.75	847.98	6544.63	11076	11906.6	36793	2267.03	1771.05	18706.2	8114.11	1284.13	1885.33	461.67	3990.44	3922.02	5107.47	5952.8	5855.16	11845.4	38195	324.64	421.76	1384.58	8035.4	4910.6	3516.99
2006-03-14	15519.8	1245.38	924.37	1326.3	16238.4	10801.7	1259.04	2506.7	3269.5	847.98	6460.01	11151.3	11973.2	37541	2295.9	1778.32	18941	8197.6	1297.48	1894.25	462.58	3965.55	3953.61	5117.16	5950.6	5870.88	11835	38343	324.88	422.72	1360.33	8034.2	4893.7	3579.16
2006-03-15	15720.4	1244.44	924.24	1333.98	16319	10801.7	1274.81	2498.02	3312.06	848.28	6518.7	11209.8	12055.6	38244	2311.84	1799.1	18999.6	8236.69	1303.02	1909.46	464.5	4031.79	3945.39	5127.93	5965.1	5898.48	11845.7	38491	326.88	425.44	1377.33	8012.6	4907.2	3571.25
2006-03-16	15729	1273.8	923.15	1335.98	16096.2	10878.7	1274.19	2498.93	3309.42	854.47	6504.98	11253.2	12085.6	38157	2299.56	1817.06	19166.4	8261.92	1305.33	1931.72	464.17	4046.67	3942.29	5126.01	5993.2	5897.79	11862.5	38534	328.82	425.44	1381.7	8018	4936.7	3553.47
2006-03-17	15801.7	1305.18	922.62	1341.12	16339.7	10860	1269.46	2494.41	3300.35	848.28	6528.57	11279.6	12000.7	38049	2306.48	1810.63	19345.8	8271.61	1307.25	1927.83	464.05	4082.87	3955.3	5141.08	5999.4	5882.38	11872.9	38364	330.11	432.23	1414.92	8047.1	4932.7	3552.45
2006-03-20	15930	1305.18	923.02	1346.69	16624.8	10941.1	1288.42	2512.6	3345.63	864.89	6516.52	11274.5	11929.3	38204	2314.11	1816.95	19581.1	8255.64	1305.08	1924.9	466.53	4059.06	3955.35	5138.51	5991.7	5902.79	11922	38489	332.32	431.84	1408.52	8059.4	4961.6	3547.47
2006-03-21	15922.8	1327.14	923.13	1336.65	16624.8	10905.2	1290.4	2497.17	3370.86	862.86	6458.03	11235.5	11947.6	37398	2294.23	1806.16	19581.1	8199.84	1297.23	1896.48	467.08	4054.78	3968.31	5148.56	5991.3	5911.86	11933.4	38602	333.33	426.26	1395.24	8056.6	4952.7	3530.55
2006-03-22	15642.8	1302.33	921.94	1309.83	16495.5	10841.4	1296.71	2489.27	3399.9	863.66	6391.26	11317.4	11947.6	37851	2303.35	1793.09	19598.1	8255.88	1305.04	1904.13	469.03	4075.9	3977.96	5194.78	6007.5	5932.31	11951.6	38519	334.29	426.26	1408.81	8064	4974.8	3561.71
2006-03-23	15771.2	1305.62	925.11	1312.26	16489.4	10840.6	1302.46	2491.64	3405.24	866.34	6364.6	11270.3	11947.6	37474	2300.15	1794.12	19255.9	8227.04	1301.67	1904.13	470.75	4093.33	3972.49	5194.78	5990.1	5947.11	11906.2	38242	336.37	426.26	1430.18	8024.1	4995.6	3571.23
2006-03-24	15716.5	1311.37	926.09	1321.23	16560.9	10950.3	1294.7	2497.31	3392.49	866.34	6376.62	11280	11947.6	37577	2312.82	1794.12	19339.3	8252.39	1302.95	1904.13	472.07	4070.49	3976.66	5218.71	6036.3	5973.14	11954.4	38178	338.8	426.26	1420.25	8045.1	5001.6	3580.79
2006-03-27	15815.9	1311.95	928.48	1330.34	16650.1	11079	1295.92	2504.23	3445.43	860.65	6421.85	11250.1	12078.5	37641	2315.58	1816.44	19226.3	8232.02	1301.61	1916.59	469.76	4050.8	3944.35	5162.44	5972.2	5912.26	11839.6	37711	337.01	443.53	1428.69	7980.9	5045.1	3640.44
2006-03-28	15856.6	1325.22	932.83	1331.31	16690.2	11086	1298.79	2513.57	3488.78	860.65	6453.85	11154.5	12048.8	36682	2304.46	1796.33	18930	8175.72	1293.23	1911.61	467.75	4041.26	3918.08	5149.99	5935.7	5890.63	11774.2	37445	336.6	444.56	1414.7	7972.9	5044.8	3677.58
2006-03-29	15745.1	1322.97	932.98	1332.72	16938.4	11183.5	1305.57	2520.75	3520.38	844.9	6498.03	11215.7	12190.6	37492	2337.78	1803.94	19132.3	8249.38	1302.89	1928.94	468.99	4053.11	3913.75	5180.25	5959.2	5914.78	11817.3	37700	338.43	451.09	1391.31	7983.4	5049.4	3687.37
2006-03-30	15880.7	1322.97	926.97	1338.14	17045.3	11307	1294.72	2521.04	3488.07	835.78	6546.06	11150.7	12207	37777	2340.82	1810.12	19214	8271.79	1300.25	1949.91	472.58	4105.5	3942.08	5240.1	6015.2	5984.19	11869.8	38206	341.28	455.2	1431.22	8035.3	5071.6	3695.12
2006-03-31	15805	1322.97	926.63	1359.6	17059.7	11280	1298.3	2533.4	3516.4	860.65	6613.97	11109.3	12110.6	37952	2339.79	1800.58	19272.6	8233.2	1294.87	1935.99	468.69	4139.83	3912.28	5220.85	5964.6	5970.08	11854.3	37928	339.32	452.29	1434.99	8023.3	5087.2	3702.48
2006-04-03	16063.8	1329.31	928.23	1379.75	17333.3	11564.4	1319.47	2548.68	3606.62	843.25	6660.76	11144.9	12210.9	38717	2336.74	1798.69	19634.2	8269.65	1297.81	1935.31	471.33	4127.56	3921.5	5255.26	6024.3	6024.05	11920	38280	344.71	457.12	1450.88	8078.5	5133.1	3705.07
2006-04-04	16100.1	1326.45	931.17	1385.64	17292.9	11638	1329.8	2532.59	3627.44	848.68	6665.6	11203.9	12174.1	38802	2345.36	1819.63	19764.1	8324.75	1305.93	1952.45	467.95	4128.53	3914.07	5205.81	6004.7	6013.85	11893.8	38039	342.02	449.93	1455.67	8051.6	5116.3	3739.55
2006-04-05	16100.1	1344.6	941.67	1388.77	17244	11746.9	1340.16	2544.89	3668.27	859.56	6665.6	11239.5	12299.1	39053	2359.75	1849.06	19930.6	8369.17	1311.56	1955.99	468.53	4119.31	3929.61	5221.03	6044.1	6029.2	11916.4	38440	343.97	454.53	1485.22	8090.5	5159	3762.95
2006-04-06	16411.1	1355.01	941.06	1397	17489.3	11746.9	1339.74	2542.64	3716.52	863.34	6760.82	11216.5	12342	39285	2361.17	1843.62	19869.7	8359.82	1309.04	1975.63	469.6	4153.78	3933.23	5222.36	6045.7	6031.39	11908.2	38405	341.71	460.53	1493.84	8102.3	5190.3	3776.14
2006-04-07	16471.8	1363.3	943.71	1402.36	17563.4	11589.4	1342.97	2552.05	3703.58	860.65	6781.94	11120	12241.2	38926	2339.02	1830.62	19472.4	8270.65	1295.5	1954.59	468.68	4129.94	3917.84	5174.96	6026.1	5952.92	11816.7	37989	340.27	457.94	1523.15	8105.2	5186.6	3800.97
2006-04-10	16521.6	1363.3	942.47	1398.29	17456.6	11662.5	1359.08	2545.92	3735.26	870.53	6780.64	11141.3	12289.7	38475	2333.27	1851.98	19548.3	8283.08	1296.62	1950.99	470.66	4144.39	3908.91	5190.27	6067	6003.4	11817.5	38496	341.17	464.88	1555.06	8109.3	5146.9	3774.09
2006-04-11	16475.8	1360.13	942.47	1386.08	17418.1	11662.5	1362.23	2554.66	3780.07	869.86	6757.17	11089.6	12177.3	37901	2310.35	1838.35	19465.2	8214.46	1286.57	1936.18	464.14	4138.74	3850.61	5112.6	6016.5	5908.47	11674.6	37657	337.55	463.73	1553.67	8029.1	5186.8	3759.7
2006-04-12	16310.8	1372.39	941.88	1383.59	17162.5	11355.7	1360.13	2546.25	3729.6	869.86	6808.5	11130	12167.7	38427	2314.68	1850.11	19322.6	8220.55	1288.12	1944.93	463.62	4110.15	3837.33	5085.11	6000.8	5901.25	11601.7	37740	337.88	458.58	1561.57	7976.6	5140	3762.56
2006-04-13	16429.5	1382.12	936.24	1405.72	17199.2	11237.2	1332.33	2544.38	3665.24	860.65	6855.74	11137.6	12248.6	38082	2326.11	1850.11	19322.6	8227.95	1289.12	1941.68	462.76	4129.96	3842	5102.62	6029.4	5918.57	11609.4	37677	338.64	458.58	1545.54	8007.3	5132.3	3734.68
2006-04-14	16429.5	1382.12	938.32	1432.72	17233.8	11237.2	1359.54	2544.38	3760.03	860.65	6952.54	11137.6	12248.6	38082	2326.11	1850.11	19322.6	8227.95	1289.12	1941.68	462.76	4129.96	3842	5102.62	6029.4	5918.57	11609.4	37677	338.64	458.58	1559.03	8007.3	5132.3	3734.68
2006-04-17	16429.5	1386.79	939.74	1422.63	17000.4	11539.7	1378.61	2550.34	3760.63	869.93	7000.09	11073.8	12309	38462	2311.16	1898.47	19632.3	8242.15	1285.33	1959.71	462.76	4129.96	3842	5102.62	6029.4	5918.57	11609.4	37677	338.64	458.58	1582.73	8007.3	5132.3	3734.68
2006-04-18	16637.5	1417.38	940.57	1427	17232.9	11821.6	1385.11	2559.25	3803.72	869.93	6989.46	11268.8	12446.8	39572	2356.14	1924.8	19820.1	8389.44	1307.28	1986.47	462.73	4150.69	3835.25	5095.97	6044.1	5902.58	11585	37511	338.26	468.07	1600.01	7961.4	5200.3	3726.18
2006-04-19	16830.4	1453.23	945.97	1437.84	17350.1	11896	1396.7	2585.84	3835.43	869.93	7038.78	11278.8	12487.3	39938	2370.88	1912.9	19933.1	8431.25	1309.93	2011.13	468.86	4226.86	3861.83	5158.14	6089.8	5993.76	11720.1	38047	342.33	470.53	1615.04	8050.9	5233.2	3704.57
2006-04-20	16944.3	1464.53	946.62	1434.15	17317.5	12039.5	1385.9	2583.73	3847.79	879.89	7102.74	11342.9	12313.7	39775	2362.55	1896.32	19979.5	8422.13	1311.46	1995.59	472.64	4249.12	3875.65	5206.79	6081.4	6063.28	11782.6	38350	343.03	479.99	1618.64	8057	5225.8	3680.55
2006-04-21	16912.2	1459.29	948.19	1451.31	17404	12030.3	1416.79	2603.45	3857.29	869.93	7093.05	11347.5	12437.2	39775	2342.86	1918.73	20174.6	8461.06	1311.28	2017.63	478	4258.5	3901.69	5252.38	6132.7	6094.75	11913.8	38495	343.55	480.88	1617.52	8093.5	5199.1	3699.88
2006-04-24	16705.7	1442.86	943.36	1430.94	16914.4	11915.2	1409.79	2592.5	3775.57	875.08	7096.04	11336.3	12342.2	39751	2333.38	1943.07	20198.7	8440.59	1308.11	2020.04	475.64	4246.16	3900.38	5221.44	6098.7	6079.09	11901.3	38037	341.88	485.88	1625.21	8076.3	5217.7	3710.11
2006-04-25	16577.8	1458.78	944.09	1431.15	16970.3	11646.8	1399.77	2583.61	3805.84	880.59	7059.94	11283.2	12329.8	39738	2330.3	1938.9	20360.6	8405.92	1301.74	2006.39	476.04	4291.32	3930.11	5235.34	6086.6	6078.8	11920.5	38078	341.25	481.98	1627.51	8041	5217.7	3710.11
2006-04-26	16672.7	1481.72	949.29	1451.22	17055.9	11938.5	1417.48	2596.65	3821.78	879.81	7168.98	11354.5	12321.7	40410	2333.63	1919.74	20566.9	8429.86	1305.41	2000.26	477.47	4302.41	3928.26	5252.32	6104.3	6107.12	11925.6	38341	341.83	484.27	1669.24	8071.1	5272.1	3760.41
2006-04-27	16742.8	1474.61	947.61	1452.53	17114.5	11835	1416.73	2601.06	3842.11	879.92	7136.21	11382.5	12187.7	39751	2344.95	1869.25	20390.6	8440.5	1309.72	1991.73	474.44	4226.78	3919.89	5213.55	6060	6067.74	11891.3	38131	339.43	470.3	1626.08	8080.1	5246.9	3777.9
2006-04-28	16661.3	1464.41	949.23	1419.73	16906.2	11851.9	1440.22	2610.71	3850.16	879.81	7171.77	11367.1	12204.2	40363	2322.57	1908.61	20646.2	8471.43	1310.61	2007.83	469.4	4174.12	3911.06	5188.4	6023.1	6009.89	11892.5	37773	336.13	469.57	1657.28	8047.3	5207	3795.17
2006-05-01	16661.3	1476.45	949.23	1419.73	16925.7	11851.9	1440.22	2610.71	3850.16	890.58	7171.77	11343.3	12204.2	40363	2304.79	1908.61	20646.2	8461.75	1305.19	2007.83	469.4	4174.12	3911.06	5188.4	6023.1	6009.89	11892.5	37773	336.13	469.57	1657.28	8047.3	5255.2	3779.76
2006-05-02	16868	1475.89	951.25	1434.9	17153.8	12218.8	1440.22	2632.8	3850.16	890.58	7199.6	11416.4	12274.5	41017	2309.84	1909.8	21079.9	8541.8	1313.21	2020.21	470.13	4220.5	3934.57	5241.19	6082.1	6051.29	11929.3	38173	339.25	477.09	1716.6	8074.7	5222.4	3762.74
2006-05-03	17027	1499.07	950.23	1435.17	17153.8	12310.7	1440.22	2659.65	3850.16	890.58	7242.37	11400.3	12196.1	40920	2303.97	1855.59	21159.2	8497.23	1308.12	2001	464.64	4257.79	3928.09	5193.94	6010	5968.96	11876.5	37910	337.8	479.73	1724.03	7964.6	5224.9	3766.66
2006-05-04	17013.9	1484.33	954.16	1441.02	17153.8	12347.6	1440.22	2644.7	3850.16	896.34	7345.04	11438.9	12125.9	40976	2323.9	1848.2	21293.7	8531.61	1312.25	2015.12	466.59	4264.68	3951.95	5233.7	6036.9	6039.32	11928.5	38136	339.78	485.6	1739.66	7965.4	5146.7	3693.21
2006-05-05	17013.9	1483.06	961.38	1441.02	17153.8	12359.7	1440.22	2632.42	3850.16	890.58	7370.44	11577.7	12270.1	41417	2342.57	1894.48	21237.5	8632.94	1325.76	2028.68	471.72	4325.59	3982.17	5286.4	6091.7	6113.29	12034.4	38399	342.6	487.48	1749.52	8058.1	5209.5	3655.88
2006-05-06	17013.9	1483.06	961.38	1441.02	17153.8	12359.7	1440.22	2632.42	3850.16	890.58	7370.44	11577.7	12270.1	41417	2342.57	1894.48	21237.5	8632.94	1325.76	2028.68	471.72	4325.59	3982.17	5286.4	6091.7	6113.29	12034.4	38399	342.6	487.48	1765.35	8058.1	5209.5	3655.88
2006-05-08	17301.8	1507.93	965.9	1452.23	17291.7	12462.5	1497.1	2657.78	4015.79	916.99	7474.05	11584.5	12294.2	41515	2344.99	1872.19	21608.7	8623.22	1324.66	2024.23	472.67	4344.35	3972.21	5282.4	6067.1	6127.98	12067.7	38552	342.53	481.98	1765.35	8103.6	5273.5	3693.71
2006-05-09	17134	1532.62	966.88	1450.44	17190.9	12513.9	1531.16	2629.68	4132.14	919.75	7388.94	11639.8	12328.2	41979	2338.25	1892.2	21822.9	8646.96	1325.14	2044.78	473.52	4256.43	3987.34	5312.18	6105.6	6140.72	12083.3	38765	342.84	486.77	1765.35	8122.1	5275.9	3716.02
2006-05-10	17080.6	1539.4	966.62	1451.09	16951.9	12612.4	1545.69	2642.89	4147.35	916.85	7324.71	11642.6	12316.3	41752	2320.74	1896.21	21781.1	8631.59	1322.85	2041.64	469.07	4295.71	3966.59	5278.27	6083.4	6118.38	12064.8	38642	341.42	488.42	1739.92	8112.9	5305.3	3738.15
2006-05-11	17140.8	1553.06	966.05	1464.7	16862.1	12435.4	1537.38	2620.58	4093.82	918.07	7361.45	11500.7	12165.4	40847	2272.7	1857.64	21435.3	8526.74	1305.92	2012.84	466.88	4319.11	3954.61	5262.94	6042	6054.72	12008.4	38523	340.72	490.36	1723.97	8097.3	5318.2	3720.82
2006-05-12	16901.8	1525.78	966.05	1445.2	16601.8	12285.1	1602.83	2620.58	4173.77	916.85	7278.96	11381	12038.1	40223	2243.78	1806.68	21154.9	8411.26	1291.24	1992.77	455.09	4232.65	3887.45	5150.45	5912.1	5916.28	11710.2	37939	331.5	477.49	1681.07	7954.1	5285.5	3680.89
2006-05-15	16494.8	1429.54	964.62	1413.98	16486.9	11822.2	1664.09	2534.83	4358.64	901.12	7176.35	11428.8	11831.7	39271	2238.52	1751.75	20722.1	8378.21	1294.5	1951.71	450.09	4090.07	3802.91	5064.85	5841.3	5857.03	11587.7	37472	324.25	452.09	1589.46	7853.9	5192.4	3633.08
2006-05-16	16393.1	1427.81	959.94	1382.11	16158.4	11873.7	1613.25	2513.7	4252.89	916	7069.9	11419.9	11829.4	39416	2229.13	1744	20851.1	8387.57	1292.08	1969.87	451.08	4026.61	3810.58	5081.69	5846.2	5851.92	11595.9	37540	324.73	452.5	1585.35	7887.1	5170.3	3623.65
2006-05-17	16615.5	1462.16	958.4	1401.47	16307.7	12217.8	1625.15	2548.69	4296.99	911.59	7116.83	11205.6	11829.4	38291	2195.8	1683.8	20261.9	8199.38	1270.32	1969.87	436.47	3907.47	3691.74	4920.31	5675.5	5652.72	11248.2	36471	311.39	452.5	1543.26	7658.5	5172.1	3649.99
2006-05-18	16266.5	1400.85	947.78	1365.15	16087.2	11391.4	1617.28	2502.18	4296.07	906.67	7034.03	11128.3	11540	37807	2180.32	1654.02	20217	8148.18	1261.81	1916.13	437.1	3830.19	3678.21	4908.69	5671.6	5666.07	11210.3	36436	306.3	427.02	1490.64	7602.3	5076.2	3639.68
2006-05-19	16313.4	1392.99	944.4	1372.29	16155.5	10938.6	1659.55	2493.98	4369.39	906.67	7074.15	11144.1	11545.8	37733	2193.88	1655.51	20182.1	8176.06	1267.03	1916.13	438.98	3846.48	3702.76	4944.57	5657.4	5672.28	11270.8	36643	306.99	427.02	1449.75	7614.3	5061.2	3679.19
2006-05-22	15805.5	1309.05	925.51	1338.59	15857.9	10481.8	1657.69	2416.69	4370.47	868.15	6938.26	11125.3	11545.8	36497	2172.86	1590.73	19369.3	8094.8	1262.07	1901.64	428.78	3559.01	3568	4813.5	5532.7	5546.24	10950.2	35264	290.59	403.46	1318.5	7430.2	4987.3	3653.53
2006-05-23	15864.6	1326.26	926.56	1329.86	15599.2	10822.8	1604.55	2429.55	4165.43	881.15	6843.98	11098.4	11539.9	36110	2158.76	1617.19	19084.8	8094.96	1256.58	1897.37	439.58	3729.23	3659.57	4931.53	5678.7	5678.49	11160.7	35906	306.61	434.19	1407.49	7572.5	4966.3	3593.13
2006-05-24	15822.6	1323.15	927.75	1333.38	15907.2	10573.1	1590.92	2436.55	4141.32	867.76	6877.01	11117.3	11423.9	35792	2169.17	1578.79	18805.6	8062.93	1258.57	1890.83	435.84	3655.13	3640.18	4870.02	5587.1	5587.23	11047.2	35672	300.93	422.94	1368.5	7481.3	4995	3618.55
2006-05-25	15696.9	1323.15	923.97	1295.76	15693.8	10666.3	1591.43	2404.45	4135.47	864.5	6861.65	11211	11653	37569	2198.24	1578.79	19405.7	8187.4	1272.88	1925.65	440.28	3655.13	3684.57	4949.53	5677.7	5706.06	11208.2	36191	300.93	422.94	1424.97	7481.3	4939.4	3580.6
2006-05-26	15895.1	1323.15	930.75	1322.43	15970.8	10809.4	1613.89	2445.02	4217.03	864.5	6879.51	11278.6	11762.8	38506	2210.37	1677.86	19585.2	8241.15	1280.16	1953.55	446.28	3802.68	3756.65	5045.09	5791	5788.36	11414.8	36617	313.13	439.66	1495.11	7679.5	5014.7	3599.43
2006-05-29	15963.8	1333.88	928.37	1329.22	15915.7	10853.1	1648.54	2439.91	4327.89	884.8	6878.88	11278.6	11845.5	38145	2210.37	1697.98	19500.5	8241.15	1280.16	1953.55	445.79	3823.51	3746.19	5015.32	5791	5755.02	11371.4	36592	314.46	449.52	1492.08	7688.1	5069.9	3625.91
2006-05-30	15857.9	1366.17	929.89	1317.7	15859.5	10786.6	1657.29	2441.54	4348.74	875.99	6846.95	11094.4	11705.4	36413	2164.74	1638.01	18841.3	8110.99	1259.87	1929.55	434.7	3742.34	3641.12	4893.87	5652	5622.43	11165.6	35796	304.42	438.21	1476.99	7533.3	5066.8	3617.03
2006-05-31	15857.9	1330	927.78	1317.7	15467.3	10398.6	1641.3	2383.87	4292.1	868.87	6846.95	11168.3	11744.5	36530	2178.88	1653.72	18677.9	8189.11	1270.09	1928.36	440.41	3743.23	3675.8	4930.18	5723.8	5692.86	11340.5	36450	307.54	438.83	1461.22	7604.4	4972.3	3613.59
2006-06-01	15645.3	1321.56	930.45	1295.09	15503.7	10071.4	1684.2	2386.7	4360.45	868.87	6872.84	11260.3	11847	37748	2219.86	1682.76	19128.6	8270.88	1285.71	1957.2	441.58	3794.27	3672.29	4947.29	5749.7	5707.59	11346.4	36593	311.15	440.92	1459.99	7617.3	5026.1	3607.84
2006-06-02	15912.7	1347.69	930.72	1309.04	15789.3	10451.3	1669.4	2419.42	4261.02	868.87	6959.64	11247.9	11898.7	37942	2219.41	1693.5	19421.7	8305.25	1288.22	1977.44	438.9	3868.16	3678.83	4959.7	5764.6	5687.04	11360.7	36529	310.27	447.47	1535.38	7665.1	5040.4	3639.15
2006-06-05	16016.2	1349.04	931.9	1301.62	15668.3	10213.5	1684.62	2407.25	4303.81	867.48	6715.27	11048.7	11699.5	36740	2169.62	1650.84	18954.9	8145.53	1265.29	1950.95	436.21	3868.16	3640.35	4916.04	5762.1	5621.19	11287.8	36462	309.42	447.47	1542.95	7665.1	5082.1	3639.15
2006-06-06	15973.1	1316.94	925.49	1301.62	15384.9	9957.32	1679.13	2390.01	4294.49	848.27	6730.27	11002.1	11666.1	36558	2162.78	1645.4	18798.3	8100.71	1263.85	1924.49	427.88	3684.27	3562.79	4797.92	5669.8	5502.81	11112	35788	309.42	435.06	1469.95	7497	5004.5	3600.58
2006-06-07	15816.5	1287.18	923.57	1266.84	15096	9756.76	1589.55	2355.43	4095.32	852.72	6612.74	10930.9	11475.4	35264	2151.8	1619.27	18413.4	8037.06	1256.15	1910.34	432.06	3668.95	3585.65	4824.77	5706.3	5543.93	11224.7	36121	302.8	432.19	1431.4	7549.8	4991.9	3653.69
2006-06-08	15450.1	1241.33	917.25	1223.13	14633	9295.81	1591.49	2297.11	4075.28	844.17	6331.81	10938.8	11415.5	35438	2145.32	1605.29	18257.6	7992.49	1257.93	1894.41	419.64	3520.25	3510.1	4684.34	5562.9	5383.28	10952.6	35306	289.16	408.7	1361.12	7344.3	4878.5	3645.99
2006-06-09	15628.7	1274.75	915.4	1235.65	14750.8	9810.46	1551.38	2337.44	4010.54	852.72	6444.63	10891.9	11390.7	35075	2135.06	1584.39	17748.7	7965.32	1252.3	1883.14	426.47	3495.91	3547.18	4768.18	5655.2	5464.08	11098.2	35826	296.45	416.04	1362.51	7434.6	4926.8	3618
2006-06-12	15621.4	1273.11	916.7	1239.84	14833	9476.15	1552.8	2338.53	4018.85	831.61	6442.9	10792.6	11197.6	33555	2091.32	1512.08	16986.3	7855.44	1237.44	1859.34	421.72	3487.03	3521.94	4723.18	5620.9	5395.55	11031.4	35423	291.87	404.88	1362.51	7332.7	4926.8	3613.03
2006-06-13	15234.4	1236.57	903.63	1203.86	14218.6	9062.65	1548.49	2293.35	4004.84	819.7	6337.21	10706.1	10904.3	32848	2072.47	1497.17	16653.2	7719.78	1223.69	1810.57	412.87	3324.05	3445.1	4617.59	5519.6	5292.14	10797.5	34928	282.71	389.76	1234.82	7154.9	4807.2	3600.52
2006-06-14	15247.9	1234.2	893.23	1221.73	14309.6	8929.44	1531.33	2280.67	3938.76	825.45	6469.01	10816.9	10960.7	32941	2086	1509.57	16802.1	7780.33	1230.04	1814.11	412.98	3365.29	3445.29	4615.44	5506.8	5305.99	10852	34850	288.78	391.2	1274.39	7171	4815	3563.25
2006-06-15	15435.1	1241.65	886.48	1219.4	14470.8	9545.06	1533.98	2302.43	3944.6	835.3	6426.39	11015.2	10960.7	32941	2144.15	1576.94	17932.3	7976.45	1256.16	1814.11	423.73	3365.29	3530.55	4724.58	5619.3	5422.22	11036.3	34850	288.78	391.2	1344.27	7324.4	4835.5	3529.2
2006-06-16	15842.6	1309.53	893.5	1262.19	14879.3	9884.51	1574.47	2373.91	4058.3	825.45	6575.77	11014.5	11208	34399	2129.95	1578.49	18041.8	7933.86	1251.54	1858.87	420.52	3431.56	3507.79	4694.89	5597.4	5376.01	10962.8	34850	288.78	391.2	1329.87	7294.5	4932.2	3558.87
2006-06-19	15768.9	1295.05	889.51	1251.67	14860.4	9997.84	1586.29	2367.9	4106.09	831.03	6583.04	10942.1	11007.6	33897	2110.42	1578.49	17581.9	7850.23	1240.13	1841.36	423.56	3502.42	3516.7	4729.02	5626.1	5439.23	11056.8	35152	297.91	408.3	1347.47	7364	4869.9	3564.51
2006-06-20	15609	1294.97	889.99	1225.83	14648.4	9822.52	1592.33	2327.11	4112.24	825.13	6363.55	10974.8	10995.5	33632	2107.06	1550.24	17781.3	7860.36	1240.12	1846.93	425.18	3500.22	3547.46	4770.42	5658.2	5493.61	11103.5	35356	297.29	404.59	1361	7397.9	4830.8	3546.55
2006-06-21	15659.4	1293.29	894.66	1227.19	14644.3	10040.1	1598.12	2329.6	4081.29	828.88	6299.59	11079.5	11112.8	34547	2141.2	1579.39	18156.2	7953.46	1252.2	1865.81	426.64	3512.1	3561.26	4774.73	5665	5503.41	11155.4	35500	298.63	405.33	1361.58	7427.1	4884.4	3541.38
2006-06-22	15826.7	1303.45	900.47	1238.83	15135.7	10275.9	1596.07	2359.55	4070.18	824.84	6485.15	11019.1	11130.2	34317	2122.98	1577.72	18188.4	7920.32	1245.6	1858.73	429.26	3532.98	3589	4803.29	5684.1	5533.42	11246.3	35615	299.99	411.51	1354.12	7483.3	4968.1	3584.83
2006-06-23	15808.8	1290.16	906.34	1228.62	15124	10401.3	1605.71	2343.03	4111.68	828.88	6452.31	10989.1	11249	34661	2121.47	1589.12	18545.7	7924.62	1244.5	1866.05	429.14	3575.29	3593.33	4817.63	5692.1	5529.74	11274.2	35737	299.99	421.79	1344.9	7485.8	4925.8	3583.9
2006-06-26	15804.8	1283.85	904.51	1238.05	15152.4	10042.1	1633.45	2367.94	4202.35	812.51	6523.68	11045.3	11372.2	34631	2133.67	1621.15	18491.4	7966.79	1250.56	1874.94	427.23	3594.1	3588.4	4801.49	5681.2	5514.63	11276.6	35588	300.28	420.58	1348.62	7463.6	4926.2	3587.86
2006-06-27	15774.7	1285.63	907.76	1247.54	15171.8	10151	1639.55	2357.58	4206.43	809.25	6572.39	10924.7	11293.2	34376	2100.25	1598.73	18021.5	7886.48	1239.2	1847.34	422.8	3605.13	3570.78	4771.24	5652.3	5459.15	11214.5	35393	296.75	430.71	1396.94	7406.8	4957.6	3613.42
2006-06-28	15742.7	1272.05	906.9	1238.71	14886.1	10129.7	1639.29	2350.8	4193.05	797.81	6540.93	10973.6	11332.3	34835	2111.84	1632.26	18101.8	7929.7	1246	1856.66	423.81	3574.97	3585.77	4774	5678.6	5456.87	11188.8	35515	296.89	425.69	1414.01	7431.9	4909.2	3574.32
2006-06-29	15865.2	1274.74	910.54	1263.02	15121.1	10162.2	1671.62	2386.77	4301.43	793.57	6607.39	11190.8	11520.9	36487	2174.38	1689.65	18908.3	8138.86	1272.87	1900.94	432.2	3619.63	3638.81	4880.38	5791.5	5581.67	11386.6	36042	304.26	430.7	1447.92	7541.1	4957.9	3581.85
2006-06-30	16267.6	1310.26	914.69	1295.15	15505.2	10609.2	1672.21	2435.39	4301.66	797.81	6704.41	11150.2	11612.9	36631	2172.09	1711.09	19147.2	8169.07	1270.2	1928.59	440.25	3745.72	3703.32	4965.96	5833.4	5683.31	11548.1	36444	309.46	433.06	1494.63	7652.1	5034	3585.87
2006-07-03	16333.7	1327.76	919.14	1294.61	15571.6	10695.3	1697.28	2438.26	4398.38	822.44	6718.5	11228	11612.9	37357	2190.43	1725.78	20060.8	8241.51	1280.19	1945.76	443.47	3807.8	3737.55	4980.62	5884.4	5712.69	11569.6	36666	310.22	439.44	1512.04	7720.7	5049.9	3598.15
2006-07-04	16369	1337.87	923.99	1285.92	15638.5	10662.2	1681.55	2448.73	4345.57	837.05	6734.51	11228	11733.2	37367	2190.43	1725.53	20329.5	8241.51	1280.19	1945.76	444.38	3799.53	3727.34	4983.88	5883.5	5729.01	11603.1	36738	311.24	440.67	1539.52	7727.8	5060.7	3597.79
2006-07-05	16267.2	1338.32	924.89	1279.85	15523.9	10919.6	1718.56	2424.11	4291.26	823.06	6659.96	11151.8	11626.4	36378	2153.34	1700.21	19514.6	8163.94	1270.91	1938.14	439.15	3773.52	3683.33	4921.3	5826.7	5625.63	11521.2	36207	307.48	433.8	1501.28	7659.2	5054.3	3604.74
2006-07-06	16441	1340.02	920	1263.96	15321.4	10768	1741.47	2448.07	4348.45	834.58	6659.07	11225.3	11602	36533	2155.09	1714.42	20047.6	8197.84	1274.08	1956.93	442.91	3845.5	3727.39	4966.45	5890	5695.47	11636.8	36534	310.05	440.86	1535.86	7704.6	5078.1	3603.33
2006-07-07	16459.8	1347.91	925.56	1273.93	15307.6	10509.5	1730.19	2445.13	4322.85	823.06	6660.61	11090.7	11631.9	36102	2130.06	1704.68	19829.6	8155.05	1265.48	1944.44	440.7	3811.44	3715.91	4953.71	5888.9	5681.85	11626.7	36434	306.91	445.46	1549.66	7655.2	5096.5	3642.28
2006-07-10	16603.8	1339.83	924.86	1299.29	15552.8	10684.3	1734.33	2438.45	4336.24	841.97	6682.46	11103.5	11654.7	36141	2116.93	1703.7	19700.2	8175.18	1267.34	1935.7	442.58	3791.46	3743.56	4982.48	5896.9	5706.32	11649.5	36588	307.96	441.1	1555.69	7704.4	5102.9	3651.24
2006-07-11	16490.1	1343.94	924.6	1300.44	15473.8	10614.4	1745.81	2415.91	4323.49	831.77	6639.13	11134.8	11793	36554	2128.86	1720.77	19570.2	8206.28	1272.43	1936.85	438.57	3738.01	3701.76	4914.39	5857.3	5616.04	11535.2	36210	303.96	440.32	1551.83	7669.4	5071.4	3663.15
2006-07-12	16522.2	1345.87	928.23	1296.69	15249.3	10930.1	1740	2422.76	4350.81	796.16	6634.09	11013.2	11771.1	36230	2090.24	1701.44	19419.4	8113.18	1258.6	1922.11	440.43	3783.49	3718.09	4941.73	5860.6	5637.82	11537.3	36298	303.81	448.08	1552.4	7707	5093.4	3669.78
2006-07-13	16305.5	1334.03	926.55	1285.02	15098	10858.5	1655.77	2396.64	4149.06	763.31	6567.6	10846.3	11601.9	35354	2054.11	1644.03	18725.3	7991.85	1242.28	1899.88	434.41	3711.3	3631.1	4852.52	5765	5527.29	11375	35774	298.69	443.51	1487.51	7588	5054.7	3666.23
2006-07-14	16135.7	1303.58	913.63	1255.13	14845.2	10678.2	1665.21	2363.55	4187.49	763.31	6428.03	10739.4	11630	35350	2037.35	1654.46	18328.7	7950.07	1236.2	1895.27	428.33	3641.03	3597.06	4780.79	5707.6	5422.22	11240.2	35445	294.33	439.28	1484.58	7506.8	4943.8	3619.44
2006-07-17	16064.8	1283.95	902.7	1255.13	14845.2	10293.2	1682.89	2320.2	4229.1	780.04	6257.8	10747.4	11480.6	34866	2037.72	1612.89	18438	7892.87	1234.49	1871.69	427.23	3605	3587.31	4750.08	5701	5416.96	11179.4	35286	291.03	431.56	1459.55	7501.3	4932.2	3590.71
2006-07-18	16043.9	1286.05	908.68	1233.42	14437.2	10226.8	1684.25	2333.81	4235.1	799.76	6285.31	10799.2	11471.7	35130	2043.22	1612.71	18885.7	7898.36	1236.86	1882.8	426.8	3562.94	3590.27	4734.54	5681.7	5396.85	11161	35183	288.57	425.18	1455.62	7461.3	4901.4	3558.96
2006-07-19	16097.5	1280.5	911.98	1233.65	14500.3	10007.3	1645.16	2341.79	4109.66	794.82	6277.24	11011.4	11619.6	36785	2080.71	1662.52	19871.8	8076.65	1259.81	1911.54	437.44	3621.4	3660.48	4846.54	5778	5539.29	11425.7	35980	298.89	426.26	1481.89	7603.6	4881.3	3532.18
2006-07-20	16472.6	1315.59	916.62	1273.3	14946.8	10352.9	1655.12	2383.54	4135.88	804.37	6443.74	10928.1	11465.5	35847	2039.42	1638.73	19510.5	8007.53	1249.13	1897.54	438.72	3639.95	3686.74	4865.04	5770.9	5545.82	11446.4	35887	298.71	431.05	1503.64	7659.6	4967.4	3541.66
2006-07-21	16464.2	1314.58	924.72	1271.33	14821.3	10085.9	1665.33	2371.37	4178.97	794.82	6420.01	10868.4	11418.3	35510	2020.39	1620.45	19527.4	7953.14	1240.29	1891.87	436.3	3570.21	3660.4	4818.55	5719.7	5451.01	11333.9	35592	294.77	423.24	1490.09	7618.1	4934.3	3535.46
2006-07-24	16480.6	1303.15	922.34	1263.35	14794.5	10215.4	1665.94	2375.04	4183.28	797.33	6359.63	11051	11625.2	36224	2061.84	1666.07	19938.7	8099.94	1260.91	1921.69	445.92	3613.61	3732.27	4914.93	5833.9	5578.05	11561.6	36154	299.83	424.68	1499.68	7780.3	4906.6	3525.92
2006-07-25	16583.9	1307.78	928.05	1279.77	15005.2	10415.6	1685.46	2407.56	4221.84	804.13	6390.99	11103.7	11754.6	36681	2073.9	1682.51	20082	8149.77	1268.88	1931.25	444.05	3646.41	3732.64	4933.12	5851.2	5565.76	11611.9	36035	299.03	437.72	1506.38	7784.8	4959.9	3548.55
2006-07-26	16617.2	1312.83	934.34	1279.08	14884.1	10617.3	1686.65	2406.31	4199.28	791.74	6376.39	11102.5	11879.5	36594	2070.46	1686.37	19913.2	8164.26	1268.4	1948.92	446.38	3697.98	3722.71	4943	5877.1	5583.1	11635.2	36206	303.29	437.27	1511.4	7815.1	4907.6	3547.53
2006-07-27	16916.8	1330.59	936.76	1296.27	15179.8	10741.6	1675.17	2444.66	4129.91	795.49	6459.25	11100.4	11758.9	36888	2054.47	1681.37	20138.8	8144.86	1263.2	1931.66	452.49	3700.48	3784.16	5001.21	5929.5	5659.07	11768.4	36499	306.24	445.04	1560.17	7856.5	4976.5	3559.87
2006-07-28	16955	1337.41	934.72	1297.07	15342.9	10680.2	1662.03	2429.44	4080.63	791.74	6480.07	11219.7	11823.7	37381	2094.14	1689.65	20252.3	8254.98	1278.55	1964.16	456.22	3711.49	3797.88	5028.51	5974.9	5705.42	11887.4	36720	307.47	440.82	1555.58	7946.5	4932.7	3553.45
2006-07-31	16971.3	1351.65	935.85	1297.82	15456.8	10743.9	1612.73	2445.43	3946.9	815.47	6454.58	11185.7	11831	37077	2091.47	1701.58	20095.9	8242.12	1276.66	1970.42	454.06	3716	3795.91	5009.42	5928.3	5681.97	11818	36606	305.56	440.62	1551.09	7941.8	4957.1	3580.56
2006-08-01	16911.4	1371.69	936.04	1287.36	15440.9	10751.7	1600.61	2445.04	3919.56	807.98	6441.46	11125.7	11907.6	36839	2061.99	1696.79	19973.2	8206.1	1270.92	1971.59	449.96	3714.5	3754.69	4948.23	5880.8	5596.74	11706.6	36292	301.61	441.78	1544.88	7941.8	4953.9	3578.13
2006-08-02	17032.8	1394.36	934.07	1295.11	15464.3	10876.2	1600.87	2453.99	3892.4	822.16	6471.42	11199.9	11969.9	37288	2078.81	1714.6	20145.1	8259.91	1277.41	2000.39	455.3	3739.51	3807.91	5026.25	5932.1	5680.82	11863	36738	304.56	448.33	1569.9	7905.2	4906.6	3563.51
2006-08-03	17048.4	1379.71	935.29	1292.05	15470.4	10923.2	1601.06	2457.09	3883.15	822.16	6462.32	11242.6	11936.7	37451	2092.34	1715.96	20261.8	8262.44	1280.27	1993.44	450.65	3710.56	3788.99	4983.68	5838.4	5640.03	11800.7	36474	303.18	442.35	1596.08	7810	4966.2	3583.01
2006-08-04	16887.8	1389.35	937.99	1304.51	15499.2	10866.5	1570.15	2462.92	3820.48	822.16	6442.61	11240.4	11936.7	37848	2085.05	1683.9	20355	8270.92	1279.36	1990.9	455.8	3753.73	3828.54	5040.95	5889.4	5723.03	11934.1	36896	305.09	442.56	1629.23	7891	4926.1	3570.38
2006-08-07	16953.5	1403.49	938.48	1289.54	15154.1	10812.6	1547.44	2460.25	3780.38	816.35	6416.61	11219.4	11936.7	37698	2072.5	1663.04	20412.5	8238.53	1275.77	1993.68	451.09	3728.7	3778.33	4956.34	5828.8	5626.67	11790.5	36508	301.5	443.96	1623.59	7790.8	4933.5	3549.84
2006-08-08	17048.2	1396.08	939.08	1311.1	15464.7	11015	1580.58	2465.04	3868.7	823.14	6502.14	11173.6	11998.2	37600	2060.85	1646.97	20342.8	8210.19	1271.48	1991.33	450.2	3714.35	3793.25	4967.95	5818.1	5651.92	11834	36633	301.78	445.63	1619.98	7793.3	4989.1	3565.37
2006-08-09	17346.6	1413.1	941.26	1314.93	15656.6	11145.2	1578.57	2465.04	3852.73	808.88	6573.22	11076.2	12008.1	37255	2060.28	1633.26	20062.4	8192.63	1265.95	2001.72	453.29	3704.78	3811.59	5025.15	5860.5	5702.81	11911.6	36851	304.03	442.78	1642.91	7882.9	4929.7	3537.03
2006-08-10	17222.1	1384.86	942.99	1304.31	15630.9	11149.2	1606.07	2444.63	3905.44	794.17	6578.61	11124.4	11959	37354	2071.74	1632.8	20048.2	8209.78	1271.81	1989.9	451.55	3706.47	3804.46	4976.64	5823.4	5630.96	11810.4	36651	301.45	436.49	1631.15	7844.2	4922.2	3514.04
2006-08-11	17250	1402.19	942.27	1292.1	15565	11192.5	1605.93	2450.63	3909.66	808.88	6571.1	11088	11944.9	36944	2057.71	1618.88	20273.9	8163.28	1266.74	1971.72	451.76	3679.77	3822.12	4985.52	5820.1	5628.37	11777.3	36644	302.9	436.07	1657.2	7858.6	4918	3506.39
2006-08-14	17290	1415.22	946	1295.11	15857.1	11313	1570.74	2450.5	3853.75	817.88	6611.9	11097.9	11850.2	36557	2069.04	1592.08	20290.5	8169.68	1268.21	1968.11	456.05	3722.63	3856.91	5046.93	5870.9	5692	11903.3	36880	305.16	432.14	1651.62	7925.1	4938.6	3486.91
2006-08-15	17274.1	1424.24	943.94	1295.11	15816.2	11313	1595.66	2440.62	3912.22	820.55	6615.13	11230.3	11977.1	37296	2115.01	1623.74	20544.4	8296.02	1285.58	1986.18	461.25	3722.63	3907.05	5115.02	5897.9	5776.8	11991.3	36880	308.96	435.91	1644.16	8055.3	4904.7	3492.23
2006-08-16	17451	1437.77	937.98	1315.61	16071.4	11448.3	1616.41	2453.43	3972.71	823.32	6696.63	11327.1	12030.2	37678	2149.54	1634.1	20900	8357.4	1295.43	2000.57	462.85	3778.34	3907.79	5137.31	5896.6	5812.94	12045.9	37335	311.18	436.5	1654.9	8089.7	4928.9	3495.35
2006-08-17	17373	1437.77	942.08	1327.78	16020.8	11477.5	1603.33	2470.65	3939.59	838.55	6733.46	11335	12056	37559	2157.61	1629.75	20971.8	8354.07	1297.48	1986.5	463.24	3760.93	3902.46	5144.84	5900.4	5833.51	12087.8	37501	314.97	431.64	1647.54	8112.8	5017.2	3484.41
2006-08-18	17330.7	1437.77	942	1331.1	16106	11465.7	1598.02	2483.53	3924.27	823.32	6721.08	11381.5	12044.8	37552	2163.95	1655.87	21046.6	8379.93	1302.3	1998.8	463.92	3759.73	3912.86	5135.69	5903.4	5817.02	12067.8	37549	314.67	434.18	1595.22	8084.2	5015.6	3468.26
2006-08-21	17007.9	1437.77	942.61	1321.67	15969	11511.7	1601.15	2467.3	3932.17	831.88	6505.92	11345	12136.9	37161	2147.75	1655.87	20861.6	8361.7	1297.52	2007.69	462.96	3730.34	3899.53	5104.65	5915.2	5794.83	12054.9	37439	314.7	442.44	1618.59	8057.6	5027.6	3424.39
2006-08-22	17149.8	1435.03	945.02	1334.96	16181.2	11502.6	1613.36	2480.99	3977.9	827.95	6590.2	11339.8	12201.1	36678	2150.02	1669.63	20986.9	8364.24	1298.82	2008.48	463.82	3710.43	3908.13	5128.33	5902.6	5818.41	12080.8	37581	316.38	442.33	1641.11	8080.6	5041.3	3426.78
2006-08-23	17088.4	1438.63	948.26	1324.95	16163	11406.6	1612.4	2472.26	3975.72	830.75	6556.33	11297.9	12195.1	35512	2134.66	1648.8	20742.4	8320.19	1292.99	2001.21	461.05	3710.41	3872.57	5082.73	5860	5775.54	12012.7	37283	313.32	446.62	1647.71	8078.7	5048	3460.08
2006-08-24	16883	1429.48	948.13	1315.73	15960.6	11532	1623.02	2446.11	3977.34	829.13	6550.64	11304.5	12132.3	35797	2137.11	1657.27	20751.5	8327.57	1296.06	1994.89	463.74	3694.96	3886.36	5112.85	5869.1	5814.08	12056	37671	312.97	444.2	1637.88	8099	4963	3468.87
2006-08-25	16955.5	1416.93	950.52	1329.35	15938.7	11572.2	1623.03	2453.21	3997.55	830.75	6526.22	11284	12119.8	35958	2140.29	1676.81	20994.9	8318.03	1295.09	2003.69	465.14	3732.21	3887.71	5111.13	5878.6	5811.47	12042.9	37718	313.33	443.75	1643.18	8102.5	4997.1	3484.42
2006-08-28	16922.3	1418	950.96	1327.89	15762.6	11619.5	1650.44	2427.05	4114.38	812.53	6444.76	11352	12167.4	36375	2160.7	1669.82	21228.9	8359.18	1301.78	2006.91	467.78	3746.58	3919.92	5148.52	5878.6	5854.99	12116.6	37807	314.94	441.04	1643.17	8118.6	4996.3	3470.6
2006-08-29	17083.3	1432.93	953.22	1344.61	15890.6	11706.9	1651.02	2455.33	4140.14	818.3	6479.91	11369.9	12060.5	36304	2172.3	1673.45	21282.1	8383.64	1304.28	2008.3	467.77	3728.25	3929.72	5160.32	5888.3	5847.02	12146.6	37800	316.87	435.59	1643.93	8165.6	5034.1	3496.6
2006-08-30	17284.7	1425.22	958.12	1341.35	15872	11723.9	1655.2	2471.4	4157.56	819.03	6587.12	11382.9	12068.4	36313	2185.73	1660.44	21331.1	8388.38	1305.37	2021.14	470.14	3743.06	3945.42	5182.79	5929.3	5867.53	12171.9	37993	319.16	440.36	1651.45	8183.4	5032.2	3497.84
2006-08-31	17392.3	1431.26	958.12	1352.74	16140.8	11699	1658.64	2482.39	4178.84	820	6611.77	11381.1	12073.8	36232	2183.75	1662.84	21049.3	8388.56	1303.82	2022.33	469.01	3735.64	3906.01	5165.04	5906.1	5859.57	12144.7	37938	318.94	439.78	1626.69	8168	5079.8	3510.27
2006-09-01	17423.7	1444.49	960.69	1356.67	16134.2	11778	1636.69	2491.49	4128.75	816.2	6651.46	11464.1	12145.1	37329	2193.16	1677.85	21192.3	8435.75	1311.01	2030.22	470.93	3788.14	3924.26	5183.45	5949.1	5876.54	12193	38159	321.09	445.35	1620	8189.1	5063.9	3514.46
2006-09-04	17513.9	1469.56	968.22	1359.06	16358.1	11914.2	1657.52	2520.45	4181.45	811.77	6750.78	11464.1	12145.1	37693	2193.16	1677.49	21385.6	8435.75	1311.01	2030.22	473.58	3789.58	3928.32	5203.24	5986.6	5909.72	12278.6	38218	325.28	450.43	1634.11	8230.2	5091.5	3532.05
2006-09-05	17438.8	1468.24	963.84	1361.24	16386	11904.6	1664.08	2519.72	4165.85	808.19	6734.73	11469.3	12198.6	37368	2205.7	1679.57	21256.1	8452.96	1313.25	2033.17	471.74	3774.61	3929.13	5172.85	5981.7	5884.07	12212.4	38135	324.37	452.44	1655.04	8226.2	5111.7	3551.88
2006-09-06	17258.5	1472.56	956.39	1357.01	16284.1	11933.2	1672.12	2526.53	4171.18	801.77	6688.4	11406.2	11999.7	36710	2167.84	1654.76	20965.2	8345.22	1300.26	2001.68	466.74	3727.1	3885.2	5115.52	5929.3	5813.06	12102.9	37829	323.03	444.67	1630.27	8172.8	5078.7	3535.98
2006-09-07	17096.4	1470.47	955.85	1351.17	16012.4	11853.9	1661.19	2505.39	4119.05	798.49	6685.23	11331.4	11895	36710	2155.29	1650.16	20833.2	8287.81	1294.02	1984.63	463.46	3684.76	3867.92	5060.09	5858.1	5773.72	12014.5	37622	319.25	439.98	1588.62	8126.1	5075.8	3535.76
2006-09-08	17145.8	1466.58	956.7	1354.89	16080.5	11918.6	1667.98	2510.14	4111.03	801.77	6693.11	11392.1	11869.6	36558	2165.79	1632.68	20795.8	8294.64	1298.92	1977.49	464.47	3716.15	3881.73	5073.57	5879.3	5795.26	12081.7	37815	322.11	438.83	1591.12	8167	5063.2	3535.42
2006-09-11	16948.6	1447.25	955.72	1334.08	15794.4	11550.7	1674.97	2488.51	4135.64	798.98	6693.88	11396.8	11656.6	35772	2173.25	1590.46	20612.9	8262.17	1299.54	1958.76	462.55	3677.2	3874.01	5058.31	5850.8	5798.46	12055.2	37684	320.2	423.35	1534.68	8094.1	4993.5	3532.34
2006-09-12	17075.4	1435.21	953.7	1328.04	15719.3	11660.8	1695.86	2487.2	4153.27	806.8	6625.73	11498.1	11678.9	36147	2215.82	1608.76	21102.8	8348.32	1313	1983.34	468.98	3682.55	3937.51	5125.97	5895.5	5873.85	12164.9	37920	325.96	425.49	1542.7	8195.1	4938.8	3521.08
2006-09-13	17210	1451.08	954.25	1333.13	15750	11893.8	1689.39	2508.03	4117.89	819.51	6664.87	11543.3	11777.2	36550	2227.67	1632.14	21320.2	8382.7	1318.07	1942.96	471.14	3697.01	3957.91	5137.93	5892.2	5906.12	12206.9	37981	329.45	430.72	1556.32	8215.7	4978.6	3525.3
2006-09-14	17183.5	1461.29	957.1	1358.75	15942.4	11973	1689.69	2518.97	4102.28	821.12	6598.87	11527.4	11648.7	36154	2228.73	1630.83	21334	8357.81	1316.28	1936.23	471.48	3729.29	3968.79	5123.85	5877.2	5907.37	12214.5	37929	331.11	430.6	1566.39	8181.8	5029	3516.2
2006-09-15	17237.7	1465.7	958.99	1361.1	15866.9	12009.6	1721.05	2521.91	4183.76	819.51	6681.09	11560.8	11656	36170	2235.59	1627.75	21548.9	8363.45	1319.66	1939.28	474.85	3723.7	3984.87	5144.88	5877	5937.87	12278.4	37892	330.58	426.72	1550.68	8229.3	4997.2	3537.94
2006-09-18	17387.2	1474.26	965.55	1374.3	15866.9	12071.3	1732.99	2552.02	4238.28	829.96	6882.48	11555	11763.5	36483	2235.75	1662.32	21666.1	8390.47	1321.18	1949.05	474.72	3751.45	3986.19	5146.96	5890.2	5926.33	12287.8	37927	332.88	430.52	1567.15	8257.8	5028.7	3547.24
2006-09-19	17346.7	1485.35	962.82	1373.95	15874.3	11970.5	1735.24	2538.24	4223.83	829.36	6881.87	11540.9	11701.7	35886	2222.37	1650.86	21659	8347.57	1317.64	1930.9	470.32	3721.62	3971.88	5115.99	5831.8	5873.46	12240.9	37679	331.42	432.98	1577.85	8232.1	5015.7	3550.04
2006-09-20	17513	1479.31	959.62	1366.44	15718.7	12109.1	1732.45	2531.42	4247.76	835.37	6877.77	11613.2	11635.4	35197	2252.89	1660.94	21841.5	8391.84	1325.18	1933.86	476.46	3725.19	4021.99	5192.74	5866.2	5954.38	12426.1	38088	334.99	430.31	1554.31	8342.4	4962.5	3517.63
2006-09-21	17620	1507.36	966.08	1366.79	15834.2	12274.3	1740.9	2538.26	4282.71	831.78	6889.89	11533.2	11627.7	34830	2237.75	1648.49	21498.1	8373.31	1318.03	1933.97	478.05	3717.31	4029.82	5208.32	5896.7	5962.03	12476.9	38243	335.78	420.62	1534.75	8373.6	4959.4	3532.61
2006-09-22	17594.7	1510.82	965.23	1348.38	15634.7	12236.8	1725.36	2520.5	4269.93	835.37	6885.6	11508.1	11581.6	34799	2218.93	1638.45	21390.4	8344.67	1314.78	1918.27	472.99	3679.59	3988.32	5141.95	5822.3	5883.32	12389.5	37855	332.51	419.45	1504.9	8294.5	4948.4	3506.85
2006-09-25	17546	1506.76	965.44	1355.21	15633.8	12173.9	1722.37	2523.89	4271.97	833.44	6911.21	11575.8	11582.7	34973	2249.07	1613.9	21674.7	8398.38	1326.37	1898.9	473.82	3660.47	4006.15	5146.49	5798.3	5901.66	12393.3	37880	329.2	405.21	1452.54	8270.5	4952.9	3496.92
2006-09-26	17308.1	1500.1	965.66	1343.97	15557.5	12321.2	1712.64	2526	4210.64	834.39	6901.75	11669.4	11642.4	35819	2261.34	1638.07	21792.3	8451.79	1336.35	1908.05	480.52	3722.95	4031.15	5219.59	5873.6	5960.63	12617.4	38216	329.78	415.95	1484.13	8382.8	4956.5	3515.74
2006-09-27	17521.5	1523.06	966.32	1360.03	15947.9	12366.9	1725.04	2557.9	4241.93	837.23	6946.27	11689.2	11751.6	36106	2263.39	1644.72	21748.6	8476.51	1336.59	1917.56	481.9	3812.98	4062.43	5243.1	5930.1	5989.71	12950	38329	334.5	424.01	1519.06	8413.1	5055	3561.71
2006-09-28	17530.6	1533.8	968.88	1371.43	16024.9	12380.7	1736.96	2567.97	4288.37	846.09	6885.12	11718.5	11817.4	36486	2270.02	1657.44	21854.5	8490.68	1338.88	1916.92	482.54	3859.14	4063.81	5250.01	5971.3	5989.16	12930.2	38428	334.28	426.58	1558.85	8416.7	5075.5	3574.23
2006-09-29	17543	1534.61	967.55	1371.41	16127.6	12454.4	1752.42	2568.86	4326.78	837.23	6883.05	11679.1	11761.3	36449	2258.43	1637.27	21937.1	8469.65	1335.85	1906.86	483.62	3868.27	4070.78	5250.01	5960.8	6004.33	12934.7	38475	334.43	426.27	1549.99	8425.9	5113	3589.34
2006-10-02	17543	1528.91	969.67	1374.22	16254.3	12454.4	1752.42	2600.06	4326.78	846.09	6960.95	11670.4	11787.4	37058	2237.6	1651.08	21620	8461.38	1331.32	1896.8	482.9	3777.95	4070.31	5243.13	5960.8	5999.46	12915.9	38444	335.66	424.15	1557.23	8381.2	5138.7	3603.7
2006-10-03	17606.5	1537.71	967.56	1374.22	16242.1	12366.4	1752.42	2593.27	4326.78	849.97	6956.88	11727.3	11526.1	36438	2243.65	1627.61	21631	8447.83	1334.11	1870.34	481.65	3759.81	4059.16	5219.79	5937.1	5992.22	12860.5	38399	332.62	414.93	1522.75	8390.2	5141.2	3602.07
2006-10-04	17629.2	1537.08	964.06	1352	16082.5	12204	1752.42	2602.92	4326.78	860.14	6874.98	11850.6	11618.1	37749	2290.95	1641.4	22106	8538.67	1350.2	1875.2	484.4	3774.51	4084.08	5256.55	5966.5	6046.37	12982.6	38707	336.42	417.77	1520.96	8448.9	5101.5	3593.39
2006-10-05	17907.7	1544.98	968.89	1352	16449.3	12389.4	1752.42	2641.48	4326.78	868.13	6997.24	11866.7	11750	37977	2306.34	1653.27	22326.9	8570.48	1353.22	1888.64	486.16	3836.71	4097.02	5288.53	6004.5	6075.28	13116.4	38958	340.59	424.26	1566	8511	5174.8	3595.7
2006-10-06	17903.4	1549.63	970.98	1352	16436.1	12372.8	1752.42	2649.3	4326.78	868.13	6997.24	11850.2	11690.9	37940	2299.99	1644.93	22350	8534.32	1349.59	1881.67	486.21	3814.77	4090.47	5282.06	6001.2	6085.82	13152.1	38955	340.59	423.9	1554.99	8521.2	5178.3	3592.49
2006-10-09	17675.2	1543.42	969.38	1319.4	16436.1	12365.8	1785.39	2621.51	4407.72	877.77	6997.24	11857.8	11690.9	38406	2311.77	1651.07	22313.4	8538.4	1350.66	1887.45	487.22	3835.35	4103.41	5284.74	6030.9	6084.4	13143.5	39082	341.83	427.83	1587.59	8548.9	5162.7	3596.22
2006-10-10	17823.7	1554.92	969.71	1328.37	16477.2	12363.8	1784.86	2647.66	4382.55	878.92	6997.24	11867.2	11755.1	38655	2315.43	1644.71	22523.6	8563.6	1353.42	1883.82	489.8	3895.19	4129.23	5309.79	6072.7	6117.71	13234.5	39323	343.11	427.83	1584.25	8627.2	5211.7	3596.1
2006-10-11	17862.8	1553.12	970.37	1325.49	16400.6	12353.5	1790.1	2641.61	4375.59	874.64	7006.67	11852.1	11619.1	38322	2308.27	1630.14	22387.1	8540.64	1349.95	1864.81	490.01	3914.08	4129.28	5313.19	6073.5	6119.45	13260.9	39489	345.39	431.34	1585.55	8638	5245.3	3614.24
2006-10-12	17873.1	1549.54	975.62	1331.78	16368.8	12538	1778.18	2640.64	4348.76	881.49	6984.58	11947.7	11719.1	38322	2346.18	1646.4	22661.8	8626.86	1362.83	1879.92	492.84	3951.89	4181.74	5361.51	6121.3	6160.28	13406.9	39604	351.06	435.86	1581.63	8673.7	5223.9	3622.99
2006-10-13	17988.9	1572.2	983.54	1348.6	16536.5	12736.4	1784.66	2666.68	4380.55	874.64	7068.8	11960.5	11908.6	38850	2357.29	1664.57	22848.3	8645.5	1365.62	1902.87	492.68	4010.44	4174.9	5353.23	6157.3	6173.68	13454.5	39580	349.79	443.19	1610.44	8651.1	5253.9	3646.58
2006-10-16	18010.2	1561.79	983.79	1356.72	16692.8	12928.2	1771.3	2669.55	4332.51	886.51	7151.42	11980.6	12061.5	39229	2363.84	1664.57	22950.2	8692.46	1369.06	1928.04	493.39	4048.31	4174.1	5361.97	6172.4	6186.54	13476.6	39650	350.2	450.38	1612.01	8632.1	5276.4	3663.01
2006-10-17	18014.8	1566.82	977.23	1351.3	16611.6	12883.8	1763.9	2637.7	4343.67	882.06	7075.13	11950	11996.6	38898	2344.95	1673.4	22799.4	8646.45	1364.05	1915	487.01	4019.8	4119.51	5302.99	6108.6	6115.1	13245.3	39139	345.86	449.49	1609.47	8535.3	5251.7	3675.46
2006-10-18	18048.1	1564.55	975.89	1354.26	16653	12858.5	1787.19	2642.42	4438.22	888.84	7017.6	11992.7	11966	38686	2337.15	1692.02	23012.9	8663.54	1365.8	1916.87	490.11	4044.92	4167.06	5361.29	6150.4	6182.78	13398.2	39479	350.09	453.45	1626.4	8620.2	5282.1	3664.91
2006-10-19	17987	1568.59	978.77	1354.06	16551.4	12723.6	1792.25	2667.58	4438.16	892.08	6995.83	12011.7	12060.6	38920	2340.94	1702.63	23168.5	8700.81	1366.96	1933.08	490.36	4029.89	4159.59	5359.74	6156	6177.42	13463.7	39439	349.92	456.12	1638.7	8620.7	5256.9	3673.23
2006-10-20	18113.5	1572.85	979.19	1364.24	16651.6	12709.4	1790.36	2686.43	4448.43	892.08	7039.37	12002.4	12035.6	38643	2342.3	1701.6	23233.5	8702.03	1368.6	1936.66	489.3	4054.21	4173.3	5375.35	6155.2	6202.82	13558	39469	351.78	459.31	1630.47	8643	5304.4	3668.26
2006-10-23	18089.8	1572.85	979.19	1364.95	16788.8	12623.3	1759.39	2691.61	4356.39	898.28	7040.26	12116.9	12119.1	39227	2355.56	1701.67	23321.4	8736.59	1377.02	1946.33	492.3	4051.24	4185.21	5411.81	6166.1	6242.91	13620.7	39381	353.18	454.5	1618.26	8697.6	5303.7	3668.26
2006-10-24	18153.4	1572.85	979.19	1366.5	16780.5	12623.3	1805.18	2691.61	4452.68	890.45	7097.42	12127.9	12195.5	39499	2344.84	1723.7	23279.8	8750.07	1377.38	1955.18	492.89	4082.55	4163.4	5404.54	6182.5	6247.52	13579.8	39298	352.8	456.99	1608.84	8662.7	5288.4	3662.02
2006-10-25	18157.9	1572.85	979.19	1371.43	16699.3	12623.3	1806.65	2714.66	4515.35	895.01	7059.89	12134.7	12341.6	39563	2356.59	1765.66	23397.7	8795.76	1382.22	1984.85	492.71	4116.96	4174.17	5422.28	6214.6	6264.92	13636.3	39407	354	456.47	1630.46	8682.5	5324.7	3662.02
2006-10-26	18353.7	1572.85	982.63	1373.65	16811.6	12698.4	1810.65	2741.69	4584.59	910.78	7080.84	12163.7	12335.7	39645	2379.1	1776.19	23361.4	8845.32	1389.08	1992.52	492.94	4116.96	4176.7	5433.79	6184.8	6284.19	13633.1	39302	352.81	463.6	1636.03	8673.8	5360.6	3705.44
2006-10-27	18351.4	1572.85	989.9	1369.09	16669.1	12906.8	1807.18	2729.98	4558.42	895.01	7086.74	12090.3	12268.9	39328	2350.62	1784.6	22762.9	8779.87	1377.34	1983.34	489.99	4107.8	4152.32	5396.03	6160.9	6262.54	13725.8	39333	350.87	464.46	1627.24	8695.4	5329.9	3719.71
2006-10-30	18351.4	1580.19	986.07	1356.11	16351.9	13024.3	1809.66	2691.6	4560.28	910.89	6995.2	12086.5	12274.4	38900	2363.77	1768.49	22370.1	8766.78	1377.93	1971.68	487.95	4082.7	4138.07	5362.23	6126.8	6258.19	13713.2	39382	348.65	458.49	1590.33	8652.4	5367.7	3754.83
2006-10-31	18324.3	1582.63	988.3	1364.55	16399.4	12961.9	1837.99	2701.75	4621.97	914.13	7021.32	12080.7	12344.6	39263	2366.71	1781.68	23047	8774.98	1377.94	1965.35	486.57	4098.28	4144.38	5348.73	6129.2	6268.92	13753	39558	349.57	461.62	1613.57	8569.7	5352.9	3784.5
2006-11-01	18453.7	1589.87	989.34	1374.35	16375.3	13033	1855.71	2737.78	4643.17	916.62	7013.99	12031	12050.4	39930	2334.35	1794.44	23042.3	8718.14	1367.81	1948.95	486.05	4098.28	4165.97	5370.86	6149.6	6291.9	13772.6	39753	352.02	464.07	1644.86	8613	5383.6	3795.75
2006-11-02	18714.8	1607.7	995.25	1383.73	16350	13091.1	1851.31	2730.98	4657.13	904.03	7078.1	12018.5	12130.7	39930	2334.02	1821.95	23042.3	8722.57	1367.34	1950.25	484.04	4090.17	4137.67	5310.07	6149.3	6223.33	13719.3	39582	349.3	460.03	1629.34	8645.7	5377.1	3758.01
2006-11-03	18749.7	1612.92	998.02	1383.88	16350	13130.8	1866.36	2722.31	4690.43	916.62	7161.61	11986	12239	40435	2330.79	1841.96	23169.9	8716.76	1364.3	1974.36	487.94	4093.19	4180.68	5336.3	6148.1	6241.15	13794.7	39811	349.41	466.68	1641.48	8698.5	5396.9	3778.41
2006-11-06	18936.5	1640.85	993.3	1379.19	16364.8	13186.9	1886.31	2729.13	4785.37	925.98	7120.44	12105.5	12333.3	41247	2365.95	1841.96	23733.1	8819.62	1379.78	1992.07	494.06	4144.44	4201.09	5402.36	6224.5	6330.65	13968.5	40209	354.43	475.55	1641.48	8798.5	5410.1	3789.31
2006-11-07	18939.3	1654.15	1003.28	1387.44	16393.4	13156.7	1889.53	2749.22	4830.29	923.51	7184.65	12156.8	12310.2	41048	2375.88	1839.88	23585.1	8835.22	1382.84	1981.39	496.68	4097.4	4213.3	5437.78	6244	6361.96	14058.3	40331	356.66	471.16	1674.95	8835.6	5456.7	3811.48
2006-11-08	18811.2	1646.07	1007.29	1380.07	16215.7	13072.5	1866.82	2735.3	4778.2	920.35	7178.34	12176.5	12378.2	41334	2384.94	1873.39	23930.6	8857.55	1385.72	1993.68	497.51	4126.35	4220.79	5437.16	6239	6349.26	14090.4	40408	356.41	472.23	1663.19	8776.7	5425.1	3818.25
2006-11-09	18952.9	1660.26	1019.93	1399.44	16198.6	13137.5	1896.48	2745.59	4869.6	921.63	7151.13	12103.3	12410.2	40815	2376.01	1893.25	23941.8	8813.73	1378.33	1999.36	493.82	4127.39	4217.01	5448.6	6231.5	6358.68	14111.4	40300	356.77	476.58	1693.41	8764.2	5398.6	3823.01
2006-11-10	18891.1	1664.84	1022.3	1395.73	16112.4	13282.9	1883.35	2745.31	4777.63	920.35	7174.2	12108.4	12340.5	40720	2389.72	1885.55	23951.6	8827.98	1380.9	1986.37	492.96	4113.69	4219.04	5447.5	6208.4	6357.77	14002.4	40480	354.9	472.47	1706.7	8735.8	5409.2	3830.85
2006-11-13	18868.5	1639.27	1019.81	1396.69	16022.5	13399	1863.77	2747.24	4663.39	930.51	7136.06	12131.9	12309.4	40606	2406.38	1890.7	24188.6	8823.98	1384.42	1979.9	494.21	4120.51	4239.64	5490.56	6194.2	6393.73	14091.9	40590	356.59	473.1	1704.47	8752.1	5389.9	3818.47
2006-11-14	18878.4	1672.07	1030.09	1407.37	16289.5	13425.5	1888.24	2759.88	4725.32	931.33	7204.04	12218	12279.6	41291	2430.66	1909.29	24288.1	8880.47	1393.22	1987.32	493.69	4111.28	4234.7	5476.28	6186.6	6387.38	14113.2	40503	356.28	476.88	1699.66	8733.8	5405.4	3840.7
2006-11-15	19093	1670.11	1028.38	1412.54	16243.5	13469.4	1922.94	2777.62	4937.06	927.44	7236.85	12251.7	12425.4	41291	2442.75	1918.07	24315.6	8901.55	1396.57	2010.56	496.98	4109	4273.81	5511.53	6229.8	6430.89	14174.3	40813	360.14	479.7	1705.84	8791.2	5399.1	3834.44
2006-11-16	19154.1	1668.82	1037.6	1410.75	16163.9	13505.9	1941.55	2798.45	4945.62	933.61	7257.48	12305.8	12365.9	41162	2449.06	1891.51	24266	8894.48	1399.76	1996.77	495.99	4150.96	4265.76	5505.72	6254.9	6443.02	14241.3	40817	358.53	482.52	1713.46	8789.4	5363.9	3813.56
2006-11-17	19182.7	1672.11	1040.79	1412.22	16091.7	13429.5	1971.79	2813.18	5067.51	927.44	7259.54	12342.5	12372.9	41029	2445.86	1886.92	24196	8897.17	1401.2	1996.66	492.62	4128.25	4223.19	5439.71	6192	6412.36	14170	40649	354.41	468.45	1688.97	8745.8	5391.5	3816.23
2006-11-20	18954.6	1684.01	1033.52	1402.21	15725.9	13430.7	2017.28	2771.41	5177.97	925.92	7261.48	12316.5	12416.6	41029	2452.72	1896.62	24196	8884.17	1400.5	2008.68	491.7	4101.19	4220.98	5454.74	6204.5	6452.33	14256	40721	356.74	471.88	1677	8760	5303.4	3809.21
2006-11-21	19008.3	1681.34	1036.16	1405.9	15734.1	13616.8	2037.55	2802.88	5239.1	929.21	7309.69	12321.6	12602.3	41570	2454.84	1918.84	24585.7	8918.08	1402.81	2022.19	491.73	4134.72	4231.23	5459.35	6202.6	6460.39	14228.1	40765	357.85	477.57	1699.31	8774.6	5339.3	3821.19
2006-11-22	19250.8	1705.44	1043.81	1422.54	15914.2	13706.5	2041.36	2830.02	5276.67	935.51	7348.77	12327	12557	41913	2465.98	1939.08	24674.8	8948.94	1406.09	2026.34	490.31	4142.46	4221.79	5452.49	6160.3	6476.13	14294.6	40861	357.62	476.68	1703.13	8778.5	5422.8	3817.61
2006-11-23	19265.3	1704.13	1046.51	1419.23	15914.2	13680.8	2062.36	2838.48	5292.43	924.42	7384.69	12327	12644.9	42070	2465.98	1933.73	24730	8948.94	1406.09	2026.34	488.27	4116.22	4194.9	5424.86	6140	6475.25	14284.4	40862	357.9	473.16	1712.95	8751.3	5441.6	3857
2006-11-24	19260.3	1717.73	1060.43	1421.73	15734.6	13703.3	2050.81	2814.81	5297.08	924.42	7427.36	12280.2	12631.1	41758	2460.26	1943.63	24792.9	8933.43	1400.95	2037.12	484.91	4094.33	4183.36	5389.46	6122.1	6411.96	14088.1	40614	352.82	473.35	1722.73	8641.5	5431.4	3849.35
2006-11-27	19204	1728.93	1068.29	1425.13	15885.4	13773.6	2047.28	2840.94	5384.02	931.68	7498.15	12121.7	12542.5	40915	2405.92	1892.2	24442.8	8820.59	1381.96	2020.33	478.33	4051.6	4132.51	5308.65	6050.1	6298.17	13786.8	40022	343.65	468.28	1727.33	8517.3	5432.5	3831.7
2006-11-28	18639.5	1691.08	1057.23	1411.47	15855.3	13602	2038.72	2787.81	5362.01	928.13	7444.94	12136.4	12530.9	41043	2412.61	1907.57	24345	8851.64	1386.72	2039.93	478.49	4005.45	4111.51	5306.24	6025.9	6281.68	13732.1	40100	343.04	462.96	1728.98	8462.2	5367.8	3832.55
2006-11-29	18780.9	1713.4	1064.6	1422.55	16076.2	13616.7	2054.09	2826.36	5457.51	936.82	7474.19	12226.7	12668.2	41970	2432.23	1961.18	24776.1	8947.17	1399.48	2059.57	481.99	4098.49	4165.37	5381.25	6084.4	6363.8	13978	40538	350.16	472.56	1765.2	8569.9	5432.5	3841.19
2006-11-30	18960.5	1718.96	1080.66	1432.21	16274.3	13696.3	2099.29	2838.53	5666.99	936.13	7567.72	12221.9	12752.4	41932	2431.77	1967.02	24962	8969	1400.63	2069.16	477.67	4093.26	4140.3	5327.64	6048.8	6309.19	13849.3	40270	346.01	473.56	1776.68	8484.6	5461.6	3863.71
2006-12-01	18690.8	1734.75	1080.11	1434.36	16321.8	13844.8	2102.05	2836.04	5748.06	936.82	7613.57	12194.1	12754.8	41327	2413.21	1929.46	24962	8949.07	1396.71	2065.93	473.32	4145.89	4114.52	5254.05	6021.5	6241.13	13660.6	39949	343.94	472.52	1780.51	8420.3	5415.2	3854.41
2006-12-04	18702.7	1731.23	1077.44	1426.46	16303.6	13874.3	2161.65	2850.72	5875.59	932.9	7647.01	12283.9	12848.7	42654	2448.39	1957.73	25207.5	9019.03	1409.12	2075.78	473.75	4204	4144.39	5296.08	6050.4	6295.23	13846.4	40155	347.88	474.22	1791.36	8479.4	5412.5	3835.04
2006-12-05	18944.2	1776.76	1088.96	1420.59	16265.8	13937.6	2173.29	2901.99	5928.03	939.39	7609.9	12331.6	12895.9	43157	2452.38	1977.16	25593.9	9064.93	1414.76	2082.8	477.64	4217.83	4174.85	5359.69	6086.4	6372.8	14032.5	40408	352.39	478.04	1821.33	8452.1	5414.2	3849.06
2006-12-06	19026.4	1784.43	1098.35	1413.73	16371.3	13949	2156.6	2895.02	5838.5	934.93	7693.33	12309.2	12889.8	43096	2445.86	1976.12	25615.8	9047.76	1412.9	2093.8	476.44	4256.49	4179.01	5350.62	6090.3	6369.51	14007.1	40482	352.06	475.45	1836.87	8509.9	5453.6	3855.02
2006-12-07	18843	1782.12	1098.26	1410.3	16473.4	13972	2156.75	2901.8	5811.52	941.9	7686.52	12278.4	12915.7	42909	2427.69	1969.55	25639.3	9041.98	1407.29	2089.35	476.9	4308.5	4224.69	5379.21	6131.5	6413.03	14062.8	40675	355.09	474.84	1848.76	8570.9	5450.6	3853.47
2006-12-08	18740	1775.29	1098.59	1390.43	16417.8	13799.5	2093.64	2865.14	5641.48	934.93	7636.3	12307.5	12899.6	42978	2437.36	1969.55	25756.8	9042.19	1409.84	2086.28	476.53	4308.5	4255.06	5384.16	6152.4	6427.41	14076.6	40660	355.3	476.56	1850.69	8540.9	5415.4	3888.72
2006-12-11	18924.7	1759.67	1101.7	1390.73	16528	13399.4	2180.5	2887.23	5951.29	944.48	7612.12	12328.5	12878.2	43297	2442.86	1972.73	25828.5	9064.69	1413.04	2085.15	479.69	4296.33	4280.82	5427.56	6159.8	6469.42	14209.6	40894	360.22	476.55	1838.61	8594	5455.5	3887.35
2006-12-12	18907.2	1754.58	1088.42	1376.98	16637.8	12995	2218.95	2893.81	5983.14	942.15	7458.56	12315.6	12858.5	43018	2431.6	1971.95	25828.5	9059.26	1411.56	2081.01	482.66	4297.53	4290.27	5426.82	6156.4	6476.17	14200.2	40865	365.21	479.42	1841.94	8670.1	5456.1	3928.11
2006-12-13	18718.2	1753.8	1079.6	1383.28	16692.9	13181.3	2223.46	2884.15	5972.47	942.81	7450.3	12317.5	12910.3	43285	2432.41	2032.74	25690.4	9082.13	1413.21	2076.84	488.79	4358.32	4305.5	5475.85	6192.5	6520.77	14327.5	41103	365.25	477.95	1829.61	8678.5	5471.4	3945.98
2006-12-14	18919.4	1767.8	1075.47	1418.38	16829.2	13487.2	2249.11	2916.28	6044.28	942.93	7480.41	12416.8	13021.8	43755	2453.85	2033.21	25863.4	9147.2	1425.49	2066.93	493.94	4375.52	4330.26	5509.58	6228	6552.58	14351.9	41102	365.66	486.69	1840.13	8776.6	5550.9	3967.84
2006-12-15	19110.7	1792.16	1089.32	1421.87	16914.3	13614.5	2273.91	2931.29	6168.49	942.93	7538.82	12445.5	12866.3	43596	2457.2	2049.65	25757.7	9140.39	1427.09	2061.81	495.11	4437.02	4347.04	5541.62	6260	6588.83	14387.6	41419	368.78	490.71	1853.24	8786.9	5557	3992.57
2006-12-18	19192.9	1787.62	1081.6	1433.23	16962.1	13731.1	2332.43	2963.44	6393.33	948.77	7624.62	12441.3	12785.2	43509	2435.57	2040.56	25857.4	9105.07	1422.48	2043.76	494.38	4454.86	4359.8	5530.32	6247.4	6597.25	14317.5	41350	368.96	499.64	1861.91	8824.3	5572.2	3991.89
2006-12-19	18964.5	1736.67	1060.36	1427.76	16776.9	13382	2364.18	2897.3	6369.14	941.97	7598.88	12471.3	12781.5	43590	2429.55	2043.09	25621.5	9139.44	1425.55	2069.33	493.43	4399.75	4339.63	5484.76	6203.9	6553.51	14176.8	41224	365.53	492.17	1837.87	8763.1	5541.6	3980.5
2006-12-20	19240.1	1766.8	1076.3	1442.28	17011	13340.2	2373.21	2920.83	6439.44	947.39	7648.35	12463.9	12783	43502	2427.61	2042.72	25394.7	9128.88	1423.53	2057.26	495.59	4449.5	4345.29	5514.42	6198.6	6586.91	14201.7	41315	369	498.71	1866.33	8770.8	5586.9	4004.96
2006-12-21	19222.8	1789.09	1076.68	1436.47	17047.8	13384.9	2342.94	2920.84	6334.17	946.66	7620.94	12421.2	12737.2	43385	2415.85	2054.84	25546.8	9103.45	1418.3	2040.11	494.62	4426.12	4366.52	5510.39	6183.7	6573.96	14150.4	41272	370.35	493.69	1864.46	8775.4	5561.7	4028.69
2006-12-22	19320.5	1785.76	1079.72	1437.49	17105	13471.7	2343.67	2942.39	6242.17	947.39	7652.47	12343.2	12718.2	43356	2401.18	2057.51	25432.6	9062.13	1410.76	2034.67	490.77	4414.9	4350.92	5453.94	6190	6503.13	14066.1	40841	371.34	495.49	1862.4	8726.7	5577.8	4019.2
2006-12-25	19320.5	1785.76	1079.72	1437.49	17092.9	13471.7	2435.76	2942.39	6382.6	927.64	7646.81	12343.2	12718.2	43356	2401.18	2057.51	25432.6	9062.13	1410.76	2034.67	490.77	4414.9	4350.92	5453.94	6190	6503.13	14066.1	40841	371.34	495.49	1851.96	8726.7	5577.8	4019.2
2006-12-26	19320.5	1783.98	1078.15	1433.92	17169.2	13708.3	2479.73	2942.53	6356.47	933.08	7727.59	12407.6	12718.2	43603	2413.51	2060.29	25705	9102.25	1416.9	2039.24	490.77	4414.9	4350.92	5453.94	6190	6503.13	14066.1	40841	371.34	495.49	1852.39	8726.7	5577.8	4019.2
2006-12-27	19725.7	1803.26	1083.22	1425.1	17248.6	13859.7	2536.39	2961.25	6489.69	932.15	7733.18	12510.6	12852.6	44526	2431.22	2089.32	26196.7	9179.4	1426.84	2056.31	497.78	4455.6	4362.85	5540.01	6245.2	6608.86	14199.4	41347	374.29	497.48	1871.18	8822.2	5616.3	4032.07
2006-12-28	20001.9	1805.52	1088.85	1434.46	17224.8	13846.3	2567.59	2963.49	6436.29	925.6	7732.93	12501.5	12909.5	44474	2425.57	2090.46	26295.2	9172.75	1424.73	2053.48	497.18	4463.47	4367.02	5533.36	6240.9	6611.81	14160.8	41401	374.59	502.25	1910.28	8803.3	5634	4047.29
2006-12-29	19964.7	1805.52	1096.24	1434.46	17225.8	13786.9	2675.47	2985.83	6647.14	932.15	7823.72	12463.1	12908.4	44474	2415.29	2090.46	26448.3	9139.02	1418.3	2056.43	495.34	4463.47	4388.53	5541.76	6220.8	6596.92	14146.5	41434	374.47	502.38	1921.92	8785.7	5644.3	4055.47
2007-01-01	19964.7	1805.52	1096.24	1434.46	17225.8	13786.9	2675.47	2985.83	6647.14	932.15	7823.72	12463.1	12908.4	44474	2415.29	2090.46	26448.3	9139.02	1418.3	2056.43	495.34	4463.47	4388.53	5541.76	6220.8	6596.92	14146.5	41434	374.47	502.38	1921.92	8785.7	5644.3	4055.47
2007-01-02	20310.2	1836.52	1096.24	1435.26	17225.8	13942.2	2675.47	2985.83	6647.14	943.84	7920.8	12463.1	12923.7	45383	2415.29	2139.14	26664.5	9139.02	1418.3	2056.43	501	4558.96	4454.16	5617.71	6310.9	6681.13	14364.4	42017	378.4	509.28	1921.92	8785.7	5645.9	4055.47
2007-01-03	20413.4	1834.71	1117.09	1409.35	17225.8	14014.9	2675.47	3037.74	6647.14	949.72	7917.3	12474.5	12701.4	44445	2423.16	2097.55	26619.4	9133.08	1416.6	2050.01	501.35	4565.91	4466.93	5610.92	6319	6691.32	14375.1	42062	376.52	502.91	1921.92	8920.2	5626.8	4049.5
2007-01-04	20025.6	1824.1	1118.18	1397.29	17353.7	13871.7	2715.72	3023.8	6705.34	946.01	7934.51	12480.7	12553.6	44020	2453.43	2073.08	26566.3	9113.16	1418.34	2023.6	500.33	4515.17	4421.26	5574.56	6287	6674.4	14382.4	41842	373.08	491.26	1921.92	8925.2	5563.9	4028.96
2007-01-05	20211.3	1832.55	1120.4	1385.76	17091.6	13860.5	2641.33	3029.04	6706.24	949.72	7835.57	12398	12478	42245	2434.25	2063.88	26135.6	9025.04	1409.71	1999.6	494.05	4421.55	4381.56	5517.35	6220.1	6593.09	14304.7	41597	372.71	489.56	1921.92	8900.2	5549.8	4035.26
2007-01-08	20029.7	1813.39	1113.02	1370.81	17091.6	13652.1	2707.2	3000	6870.5	941.4	7736.71	12423.5	12553.1	42830	2438.2	2070.51	26281.6	9041.12	1412.84	2008.52	492.81	4381.5	4406.59	5518.59	6194.2	6607.59	14322.3	41527	372.42	495.15	1921.92	8850.3	5484.5	4028.59
2007-01-09	19898.1	1780.88	1118.96	1374.34	17237.8	13566.3	2807.8	3008.35	7078.59	933.5	7790.01	12416.6	12468	42007	2443.83	2014.01	25783	9023.9	1412.11	2010.47	495.87	4405.16	4426.15	5533.03	6196.1	6614.37	14311.5	41566	372.7	487.95	1798.63	8874	5564.1	4052.65
2007-01-10	19571.4	1710.37	1113.19	1355.79	16942.4	13362.2	2825.58	2961.15	7346.02	917.77	7698.52	12442.2	12457.5	42336	2459.33	2044.08	25885.8	9003.12	1414.85	2015.74	492.49	4307.07	4405.87	5501.95	6160.7	6566.56	14116.1	41360	370.19	482.34	1770.67	8861.6	5502.1	4064.08
2007-01-11	19385.4	1703.84	1106.06	1365.31	16838.2	13630.7	2770.11	2969.69	7289.59	923.13	7618.55	12515	12519.9	42670	2484.85	2043.01	26247.9	9063.09	1423.82	2037.57	500.16	4372.34	4473.58	5609.8	6230.1	6687.3	14328.8	41942	377.48	491.16	1800.61	8987.9	5542.7	4049.65
2007-01-12	19613.4	1678.04	1119.33	1388.37	17057	14056.5	2668.11	3009.09	7187.02	917.77	7761.71	12556.1	12678.8	43095	2502.82	2072.62	26324.4	9139.94	1430.73	2058.03	502.84	4397.04	4485.89	5617.62	6239	6705.17	14368.2	42111	377.84	492.86	1797.59	9032.8	5611.9	4051.84
2007-01-15	20068.6	1730.47	1127.41	1390.96	17209.9	14129.6	2794.7	3035.58	7636.45	943.13	7783.5	12556.1	12755.4	42919	2502.82	2083.39	26480	9139.94	1430.73	2058.03	505.38	4421.76	4494.11	5631.08	6263.5	6731.74	14416.7	42307	382.98	506.57	1850.21	9101.7	5649	4085.61
2007-01-16	20028	1754.29	1132.61	1389.71	17202.5	14114.7	2821.02	3038.21	8002.89	942.27	7792.08	12582.6	12720.3	42624	2497.78	2071.03	26480.3	9139.56	1431.9	2060.8	504.81	4381.75	4468.28	5591.54	6215.7	6716.82	14355.6	42115	382.67	503.53	1851.63	9073	5650.4	4067.14
2007-01-17	20051.4	1758.48	1139.71	1379.48	17261.3	14131.3	2778.9	3037.66	7775.65	943.19	7833.98	12577.1	12730.4	42735	2479.42	2055.38	26558.5	9146.26	1430.62	2080.41	505.26	4365.61	4464.86	5561.78	6204.5	6701.7	14295	41749	383.96	498.97	1810.63	9104.6	5626.1	4073.33
2007-01-18	20263.5	1777.71	1147.66	1383.21	17370.9	14217.8	2756.98	3061.65	7790.87	944.26	7895.18	12567.9	12640.7	42478	2443.21	2024.57	26112.9	9125.38	1426.37	2063.03	505.53	4356.79	4467.39	5555.04	6210.3	6689.62	14265.3	41711	383.33	502.48	1807.28	9099.3	5650.8	4096.34
2007-01-19	20327.7	1795.56	1147.76	1360.56	17310.4	14182.7	2832.21	3072.88	8065.31	943.19	7840.08	12565.5	12719	43428	2451.31	2037.32	26213.4	9179.53	1430.5	2067.95	507.12	4394.19	4472.73	5614.7	6237.2	6747.17	14397.9	42123	385.12	508.87	1812.93	9155.1	5652.1	4091.11
2007-01-22	20772.2	1817.41	1157.85	1363.41	17424.2	14209.2	2933.19	3145.2	8343.07	949.54	7842.47	12477.2	12705.8	43553	2431.07	2043.74	26432.2	9130.92	1422.95	2060.44	503.51	4417.28	4457.01	5579.78	6218.4	6687.31	14359.7	42002	385.79	514.24	1841.97	9102.2	5704	4121.09
2007-01-23	20769.7	1808.57	1169.12	1363.09	17408.6	14041.2	2949.14	3132.9	8311.26	949.69	7852.36	12533.8	12910.9	44177	2431.41	2055.39	26810	9199.73	1427.99	2086.8	502.82	4434.58	4429.38	5575.07	6227.6	6678.93	14368.6	42106	384.07	513.85	1856.4	9105.5	5714.1	4131.13
2007-01-24	20821	1805.69	1183.04	1383.06	17507.4	14110.5	2975.13	3150.24	8366.58	955.16	7935.54	12621.8	13010.7	44687	2466.28	2070.62	27338.3	9268.49	1440.13	2088.94	506.55	4462.48	4465.15	5638.08	6314.8	6748.37	14540.7	42566	385.48	521.409	1861.46	9153.1	5749.1	4138.19
2007-01-25	20669.8	1773.96	1179.66	1382.36	17458.3	14282.7	2857.36	3108.63	8013.25	953.07	7923.77	12502.6	12927.3	44687	2434.24	2044.03	26899.3	9154.66	1423.9	2075.3	503.03	4492.62	4438.55	5609.2	6269.3	6719.58	14537.3	42457	387.07	517.28	1880.45	9134.1	5753.3	4135.56
2007-01-26	20281.1	1759.21	1169.89	1371.33	17421.9	14282.7	2882.56	3087.74	8223.29	955.16	7821.32	12487	12979.3	44412	2435.49	2039.46	27045.7	9154.1	1422.18	2087.36	499.8	4448.96	4399.87	5582.3	6228	6690.34	14415.4	42184	384.37	521.07	1863.28	9041.1	5753.3	4120.86
2007-01-29	20236.7	1764.99	1177.53	1363.1	17470.5	14212	2945.26	3128.91	8359.99	959.62	7751.79	12490.8	12946	43573	2441.09	2022.27	26834	9139.55	1420.62	2104.61	500.31	4462.29	4415.17	5619.7	6239.9	6726.01	14507	42259	384.92	524.12	1836.77	9110.8	5744	4136.34
2007-01-30	20460.5	1765.52	1181.42	1370.72	17490.2	14212	2930.56	3130.26	8262.33	961.08	7739.91	12523.3	13014.6	44044	2448.64	2047.87	27135.4	9206.39	1428.82	2115.73	502.83	4480.37	4435.98	5645.59	6242	6788.23	14553.4	42290	387.62	522.2	1824.77	9147	5791.5	4128.03
2007-01-31	20106.4	1757.26	1189.35	1360.23	17383.4	14090.9	2786.34	3125.56	7632.94	958.26	7699.64	12621.7	13034.1	44642	2463.93	2070.64	27561.5	9254.73	1438.24	2123.71	499.81	4522.01	4433.57	5608.31	6203.1	6789.11	14553.2	42197	386.67	523.36	1842.93	9135.1	5757.7	4152.98
2007-02-01	20430.2	1771.33	1189.35	1382.9	17519.5	14267.2	2785.43	3168.1	7700.64	970.2	7701.54	12673.7	13144.7	44815	2468.38	2081.53	27842.8	9327.69	1445.94	2145.76	505.59	4566.1	4467.81	5662.25	6282.2	6851.28	14571.5	42461	388.05	528.12	1894.25	9217.9	5796.8	4144.2
2007-02-02	20563.7	1780.38	1209.48	1413.14	17547.1	14403.8	2673.21	3217.68	7348.03	958.26	7777.03	12653.5	13111.6	44998	2475.88	2081.27	27933.1	9325.24	1448.39	2136.22	506.78	4560.19	4507.29	5677.3	6310.9	6885.76	14631.2	42596	387.41	530.64	1896.62	9260.5	5814.4	4144.4
2007-02-05	20455.6	1768.54	1225.73	1417.95	17344.8	14515.9	2612.54	3223.32	7292.95	978.86	7783.12	12661.7	13166.7	45286	2470.6	2076.21	27933.1	9313.21	1446.99	2134.92	506.19	4563.98	4504.45	5681.11	6317.9	6874.06	14616.7	42696	389.14	529.4	1905.44	9257.9	5805.1	4148.58
2007-02-06	20655.2	1761.29	1236.63	1428.58	17406.9	14478.2	2675.7	3223.25	7341.53	976.22	7875.75	12666.3	13183.3	45352	2471.49	2100.65	28067.4	9345.25	1448	2148.88	507.4	4556.19	4530.1	5676.78	6346.3	6875.7	14703.2	42617	391.82	531.02	1923.27	9266.2	5848.5	4148.58
2007-02-07	20679.7	1764.91	1243.57	1426.29	17292.3	14643.1	2716.18	3236.6	7541.74	982.79	7850.06	12666.9	13142.2	44588	2490.5	2100.08	28123.8	9353.62	1450.02	2162.95	509.08	4571.81	4544.93	5703	6369.5	6915.56	14854.6	42868	393.33	530.01	1917.82	9288.2	5870.9	4211.61
2007-02-08	20735	1751.32	1248.83	1423.58	17292.5	14652.1	2737.73	3217.76	7691.46	981.26	7842.22	12637.6	13184.3	44892	2488.67	2105.92	28197.3	9345.54	1448.31	2165.59	504.78	4547.44	4505.85	5665.1	6346.4	6876.73	14826	42487	388.95	523.98	1879.37	9229.3	5872.9	4185.49
2007-02-09	20677.7	1740.32	1240.87	1427.68	17504.3	14538.9	2730.39	3220.89	7627.94	982.79	7859.53	12580.8	13084	44284	2459.82	2100.24	27906.9	9291.65	1438.06	2153.06	507.3	4554.44	4518.83	5692.45	6382.8	6911.11	14875.5	42744	391.55	531.34	1885.93	9292.1	5899.3	4188.89
2007-02-12	20593.4	1734.46	1231.87	1414.29	17504.3	14190.7	2807.17	3170.46	7951.58	976.92	7776.36	12552.5	13040.5	43935	2450.38	2100.51	27972.2	9258.32	1433.37	2138.27	503.77	4534.6	4500.79	5643.95	6353.5	6859.45	14769	42451	387.04	525.56	1838.62	9261.6	5895	4179.57
2007-02-13	20132.2	1727.36	1234.31	1418.44	17621.5	14091	2831.87	3149.16	8104.27	992.73	7736.83	12654.9	13171.8	45197	2459.88	2115.57	28262.7	9351.35	1444.26	2154.78	506.66	4535.69	4528.09	5682.69	6381.8	6895.34	14824.6	42650	388.43	529.4	1866.98	9240	5907.3	4184.84
2007-02-14	20209.9	1750.99	1245.64	1436.1	17752.6	14009.9	2905.09	3182.21	8315.91	1001.68	7809.45	12741.9	13204.5	45996	2488.38	2129.94	28539.7	9427.31	1455.3	2169.86	508.07	4578.49	4547.83	5725.84	6421.2	6961.18	14905.7	42898	394.65	533.82	1889.96	9299.2	5937.7	4181.31
2007-02-15	20538.4	1774.55	1258.63	1443.63	17897.2	14355.5	2993.01	3252.49	8582.91	998.18	7809.45	12765	13288.2	45955	2497.1	2132.65	28498.8	9434.96	1456.81	2168.14	507.77	4596.71	4544.74	5720.88	6433.3	6958.62	14876.9	42876	397.21	523.49	1894.92	9305.4	5969.1	4192.67
2007-02-16	20567.9	1794.36	1262.09	1448.81	17875.7	14355.5	2998.47	3236.93	8572.27	1001.68	7809.45	12767.6	13312	45849	2496.31	2145.49	28491.1	9433.42	1455.54	2157.98	506.1	4533.01	4532.75	5713.59	6419.5	6957.07	14851.2	42879	395.87	520.53	1897.07	9336.3	5935.5	4179.89
2007-02-19	20567.9	1799.29	1262.09	1448.81	17940.1	14402.9	2998.47	3236.93	8572.27	1005.25	7809.45	12767.6	13291.5	45849	2496.31	2188.59	28590.2	9433.42	1455.54	2157.98	509.22	4611.78	4551.27	5739.9	6444.4	6987.08	14915.8	42993	398.36	524.01	1904.84	9345.6	5969.3	4140.22
2007-02-20	20567.9	1806.48	1262.09	1452.96	17939.1	14253.4	2998.47	3236.93	8572.27	993.21	7809.45	12786.6	13319.6	45849	2513.04	2206.03	28589.7	9453.93	1459.68	2150.77	508.02	4573.75	4535.45	5713.45	6412.3	6982.91	14886.1	42647	395.46	518.21	1893.64	9315.3	5969.4	4110.48
2007-02-21	20651.4	1816.57	1278.22	1451.38	17913.2	14188.5	2998.47	3293.61	8572.27	993.33	7809.45	12738.4	13330.3	46090	2518.42	2203.24	28716	9433.53	1457.63	2154.43	508.78	4533.93	4515.44	5694.56	6357.1	6941.66	14788.8	42303	394.21	517.83	1905.46	9207.1	5933.3	4095.78
2007-02-22	20809.2	1808.44	1276.52	1465.41	18108.8	14021.3	2998.47	3288.85	8572.27	995.28	7809.45	12686	13318	46452	2524.94	2204.23	28676.5	9433.06	1456.38	2162.7	509.33	4569.49	4509.82	5707.86	6380.9	6973.73	14791.3	42493	394.28	518.6	1934.26	9251.8	5991.1	4089.77
2007-02-23	20711.7	1791.55	1283.47	1469.88	18188.4	13632.5	2998.47	3310.44	8572.27	993.33	7809.45	12647.5	13343.5	46016	2515.1	2202.45	28505.7	9420.2	1451.19	2165.47	510.61	4582.63	4495.71	5716.38	6401.5	6992.58	14767.1	42500	396.99	521.26	1934.26	9258	6009.3	4120.31
2007-02-26	20508	1783.95	1272.87	1470.03	18215.3	13649.5	3040.6	3307.92	8588.69	996.48	7900.2	12632.3	13404.5	46207	2504.52	2219.01	28046.2	9421.44	1449.37	2175.57	511.17	4598.56	4519.03	5759.75	6434.7	7027.59	14856.1	42849	400.64	525.9	1970.77	9223	6021.9	4110.61
2007-02-27	20147.9	1764.01	1237.08	1454.6	18119.9	13478.8	2771.79	3232.02	7790.82	974.81	7901.96	12216.2	13040.1	43145	2407.86	2052.78	26418.8	9088.65	1399.04	2105.03	500.33	4372.45	4387.37	5588.39	6286.1	6819.65	14408.3	41616	384.89	507.3	1906.08	8909.8	5977.6	4099.43
2007-02-28	19651.5	1740.97	1196.45	1417.34	17604.1	12938.1	2881.07	3111.94	8039.7	970.72	7901.96	12268.6	13045	43892	2416.13	2067.64	26639	9124.54	1406.82	2116.56	490.21	4335.48	4305.23	5516.32	6171.5	6715.44	14248.4	41155	377.57	498.78	1858.14	8789.7	5816.5	4037.13
2007-03-01	19346.6	1759.49	1180.91	1417.34	17453.5	13159.5	2797.19	3092.58	7804.35	961.73	7678.67	12234.3	12981.1	43517	2404.21	2038.59	26647.7	9074.27	1403.17	2113.99	481.96	4303.36	4267.76	5458.4	6116	6640.24	14064.9	40686	376.58	493.99	1797.1	8781.9	5798.3	4048.83
2007-03-02	19442	1760.02	1164.68	1414.47	17217.9	12886.1	2831.53	3078.74	7923.33	970.72	7670.77	12114.1	12863.3	42370	2368	1997.64	26321.1	8957.97	1387.17	2087.74	480.2	4346.46	4272.02	5424.7	6116.2	6603.32	13962.2	40574	378.38	497.42	1795.89	8798.7	5775.2	4098.69
2007-03-05	18664.9	1698.82	1110.69	1376.15	16642.2	12415	2785.31	2982.29	7826.56	946.57	7344.56	12050.4	12711.2	41179	2340.68	1944.12	25788.4	8837.97	1374.12	2055.91	475.59	4302.25	4218.17	5385.03	6058.7	6534.57	13749.1	40157	373.09	488.03	1737.71	8676.9	5642.4	4035.33
2007-03-06	19058.6	1732.44	1130.96	1402.93	16844.5	12697.1	2840.18	3036.52	7924.81	958.73	7451.06	12207.6	12868.2	43218	2385.14	2004.77	26355.6	9006.01	1395.41	2081.01	478.16	4312.51	4249.61	5437.13	6138.5	6595	13825.9	40374	374.42	493.23	1763.66	8775.6	5749.9	4033.36
2007-03-07	18918.6	1743.19	1156.58	1410.95	16764.6	12579.8	2896.59	3059.15	8140.34	958.76	7480.89	12192.5	12989.6	42667	2374.64	1995.07	26184.4	8999.2	1391.97	2074.42	481.9	4368.05	4301.19	5455.07	6156.5	6617.75	13912.7	40370	379.98	494.63	1767.1	8878.4	5803.3	4062.52
2007-03-08	19175.2	1771.56	1187.06	1423.89	17090.3	13049.4	2928.02	3122.49	8249.2	971.92	7573.87	12260.7	13051	43466	2387.73	2035.03	26773.8	9078.65	1401.89	2075.6	489.03	4498.95	4369.55	5524.26	6227.7	6713.23	14194	40897	387.28	506.53	1767.1	8955.7	5799.6	4069.41
2007-03-09	19134.9	1764.58	1188.83	1423.58	17164	12885	2937.91	3143.71	8146.44	971.92	7568.2	12276.3	13057.4	44133	2387.55	2036.46	27106.5	9094.99	1402.84	2094.46	490.35	4538.51	4378.28	5537.84	6245.2	6716.52	14257.2	40882	387.51	503.68	1808.65	8933.9	5810.2	4079.97
2007-03-12	19442.4	1794.52	1203.29	1441.33	17292.4	12902.6	2954.91	3182.68	8130.75	982.73	7629.15	12318.6	13065.1	44249	2402.29	2068.18	27261.2	9120.93	1406.6	2108.03	489.54	4483.16	4359.77	5496.07	6233.3	6715.49	14146.5	40697	388.25	502.68	1811.91	8899.4	5868.1	4088.13
2007-03-13	19333.1	1797.4	1200.01	1436.05	17178.8	12983	2964.79	3158.9	8200.61	978.34	7684	12076	12809.6	42749	2350.57	1990.35	26589.2	8926.88	1377.95	2064.99	484.38	4444.53	4301.78	5432.94	6161.2	6623.99	13982.9	40277	383.61	501.76	1817.15	8829.1	5844	4105.72
2007-03-14	18836.9	1762.28	1166.38	1407.37	16676.9	12529.6	2906.33	3053.21	8090.47	960.56	7570.27	12133.4	12808.7	43288	2371.74	2011.51	26719.3	8958.6	1387.17	2063.37	473.38	4325.39	4196.56	5296.22	6000.7	6447.7	13602.4	39290	371.28	491.83	1779.1	8577.7	5727.3	4053.41
2007-03-15	18969.4	1776.36	1180.31	1426.93	16860.4	12543.9	2951.7	3094.6	8273.53	956.53	7695.96	12159.7	12874.3	43278	2378.7	2007.5	26883.5	9005.25	1392.28	2082.76	483.39	4429.46	4262.79	5389.85	6133.2	6585.47	13940.4	39916	380.14	496.52	1809.16	8706.8	5831.8	4054.21
2007-03-16	18953.5	1777.89	1182.2	1427.88	16744.2	12430.4	2930.48	3068.75	8147.32	956.53	7719.8	12110.4	12829.7	42730	2372.66	1985.79	26901.4	8983.01	1386.95	2098.32	482.14	4436.4	4257.21	5382.16	6130.6	6579.87	13977.4	39868	379.85	497.97	1821.34	8717.6	5817.8	4037.59
2007-03-19	19266.7	1777.89	1192.22	1443.39	17009.5	12645	3014.44	3113.39	8276.79	955	7737.46	12226.2	13011.7	43713	2394.41	2030.6	26901.4	9090.96	1402.06	2111.39	492.44	4506.9	4364.65	5458.95	6189.4	6671.41	14250.2	40480	386.5	506.77	1846.38	8841.7	5839.2	4050.31
2007-03-20	19356.9	1775.42	1205.28	1444.17	17163.2	12705.9	3032.2	3116.88	8294.62	955.64	7736.2	12288.1	12977.4	44351	2408.21	2040.03	27407.5	9158.27	1410.94	2140.12	498.29	4506.61	4373.75	5503.27	6220.3	6700.29	14323.2	40519	389.06	509.46	1831.22	8882.4	5856.5	4041.61
2007-03-21	19516.4	1779.24	1209.34	1442.85	17163.2	12945.9	3057.38	3155.69	8400.29	962.36	7757.03	12447.5	13155.5	45631	2455.92	2083.63	28219.5	9317.73	1435.04	2164.5	500.89	4540.92	4382.26	5502.18	6256.8	6712.06	14310.5	40719	391.75	514.84	1847.26	8942.2	5846.3	4052.51
2007-03-22	19690.2	1809.07	1221.72	1448.53	17419.2	13308	3071.23	3219.51	8434.83	973.13	7823.67	12461.1	13139.6	45424	2451.74	2073.93	28258.8	9313.82	1434.54	2156.01	509.01	4633.75	4470.15	5598.37	6318	6856.96	14490.1	41547	397.63	516.51	1889.62	9074.3	5935.4	4076.03
2007-03-23	19692.6	1805.96	1235.65	1447.38	17480.6	13285.9	3074.29	3205.82	8489.86	973.13	7859.32	12481	13237.7	45533	2456.18	2085.51	28272	9338.4	1436.11	2150.21	513.84	4654.82	4500.75	5634.75	6339.4	6899.06	14545.7	41816	397.16	522.159	1914.47	9089.8	5933.1	4064.05
2007-03-26	19765.8	1813.72	1244.32	1449.77	17522	13124.3	3122.81	3204.55	8631.39	983.79	7877.82	12469.1	13302.9	45645	2455.63	2077.02	28159	9341.36	1437.5	2162.79	508.8	4701.02	4448.51	5576.3	6291.9	6828.82	14469.6	41343	393.42	519.159	1924.79	9006	5970.5	4105.15
2007-03-27	19706.8	1819.66	1247.17	1453.23	17365	13124.3	3138.83	3234.11	8629.23	990.06	7845.17	12397.3	13218.8	45207	2437.43	2060.28	28124.3	9288.79	1428.61	2154.77	508.21	4642.97	4472.22	5587.06	6292.6	6858.34	14536.8	41337	395.6	515.85	1911.06	8966.3	5952.3	4127.28
2007-03-28	19553.9	1800.39	1235.24	1439.74	17254.7	12884.3	3173.02	3201.75	8587.35	981.4	7788.14	12300.4	13197.1	44484	2417.1	2072.07	28098.3	9218.53	1417.23	2151.25	505.11	4609.69	4441.23	5552.69	6267.2	6816.89	14483	41201	391.68	519.52	1925.64	8870.6	5913.3	4109.87
2007-03-29	19821.8	1817.72	1235.89	1450.95	17263.9	12979.7	3197.54	3228.88	8579.32	994.5	7848.33	12348.8	13258	45355	2417.88	2099.09	28704.2	9279.08	1422.53	2172.2	511.85	4640.31	4493.7	5631.53	6324.2	6897.08	14605.3	41766	395.81	522.49	1940.47	8977.5	5945.7	4112.56
2007-03-30	19800.9	1830.92	1246.87	1452.55	17287.7	13072.1	3183.98	3231.24	8549.2	981.4	7884.41	12354.4	13165.5	45805	2421.64	2102.78	28747.7	9261.82	1420.86	2174.9	510.5	4645.5	4471.65	5634.16	6308	6917.03	14641.7	41771	396.43	521.2	1935.72	8977	5978.8	4107.14
2007-04-02	19809.7	1849.38	1246.3	1459.53	17028.4	12455.4	3252.59	3246.31	8785.83	981.4	7884.99	12382.3	13265.8	45597	2422.26	2102.78	29171.5	9305.55	1424.55	2180.27	512.02	4674.16	4485.69	5645.56	6315.5	6937.17	14730.8	41990	399.91	521.83	1927.73	8956.3	5908.2	4137.95
2007-04-03	20002.7	1894.58	1256.82	1463.75	17244	12624.6	3291.3	3288.36	8963.46	1000.87	7932.91	12510.9	13361.2	46288	2450.33	2114.62	29348.1	9381.46	1437.77	2190.09	516.039	4689.93	4547.42	5711.91	6366.1	7045.56	14953.2	42398	405.88	524.42	1920.8	9054	5997.6	4175.29
2007-04-04	20209.7	1922.05	1271.31	1483.41	17544.1	12786.8	3291.54	3332.92	9090.45	1023.38	8004.61	12530	13448.3	46554	2458.69	2127.48	29370.9	9398.56	1439.37	2190.55	517.6	4695.5	4558.5	5739.01	6364.7	7073.91	14943.1	42412	404.93	525.63	1929.94	9057.6	6079	4187.98
2007-04-05	20209.7	1895.61	1277.48	1482.04	17491.4	12856.1	3319.14	3345.86	9161.48	1023.39	8004.61	12560.8	13425	46647	2471.34	2127.48	29370.9	9426.57	1443.76	2197.82	519.289	4683.87	4553.63	5741.38	6397.3	7099.91	14974.9	42463	404.87	525.63	1942.75	9099.1	6063.4	4184.7
2007-04-06	20209.7	1895.61	1278.92	1484.15	17484.8	12856.1	3323.59	3345.86	9268.23	1023.39	8004.61	12560.8	13425	46647	2471.34	2127.48	29370.9	9426.57	1443.76	2197.82	519.289	4683.87	4553.63	5741.38	6397.3	7099.91	14974.9	42463	404.87	525.63	1946.47	9099.1	6063.4	4184.7
2007-04-09	20209.7	1913.73	1298.36	1501.06	17743.8	13177.7	3398.95	3400	9475.7	1023.39	8056.56	12569.1	13482.3	46855	2469.18	2131.94	29632.2	9429.21	1444.61	2197.95	519.289	4683.87	4553.63	5741.38	6397.3	7099.91	14974.9	42463	404.87	525.63	1964.07	9099.1	6063.4	4184.7
2007-04-10	20347.9	1925.47	1306.34	1499.16	17664.7	13189.5	3444.29	3422.62	9652.68	1027.91	8048.39	12573.9	13431.3	47174	2477.61	2155.58	29515.6	9468.7	1448.39	2205.55	524.09	4733.44	4595.72	5766.27	6417.8	7166.67	15005.5	42892	409.59	528.86	1977.33	9150.7	6139.1	4180.47
2007-04-11	20449.4	1931.04	1306.22	1513.42	17670.1	13183.2	3495.22	3420.62	9753.77	1030.65	8084.45	12484.6	13401	46939	2459.31	2154.5	29278.8	9413.63	1438.87	2199.05	522.1	4733.07	4587.7	5751.92	6413.3	7152.83	14997.6	42805	407.85	527.54	1984.44	9136.1	6136.1	4147.36
2007-04-12	20380.2	1930.4	1307.19	1525.61	17540.4	13113.8	3531.03	3372.69	9964.78	1024.94	8075.2	12553	13499.6	47347	2480.32	2188.07	29607	9477.76	1447.8	2211.49	518.909	4672.63	4568.24	5748.94	6416.4	7142.95	14883	42756	408.55	523.08	1967.02	9110.1	6142.8	4168.1
2007-04-13	20341	1941.15	1308.2	1520.78	17364	13384.1	3518.27	3373.59	10019.9	1030.65	8002.3	12612.1	13578.6	47926	2491.94	2212.98	29762.2	9522.86	1452.85	2224.42	523.679	4720.03	4581.26	5789.34	6462.4	7212.07	14965.3	43016	411.37	527.4	2001.59	9177.5	6123.8	4164.3
2007-04-16	20757.5	1963.82	1322.91	1532.04	17628.3	13695.6	3596.44	3414.15	10249.1	1046.96	8043.54	12720.5	13660	48921	2518.33	2224.83	29718.7	9625.53	1468.33	2229.63	532.09	4742.04	4614.86	5861.97	6516.2	7338.06	15020.8	43440	415.26	531.96	2008.42	9269.9	6183.6	4170.71
2007-04-17	20788.6	1965.44	1330.26	1528.66	17527.5	13607	3611.87	3415.32	10289	1044.84	7959.29	12773	13658	48755	2516.95	2195.16	29599	9631.69	1471.48	2238.01	532.68	4707.44	4602.16	5858.14	6497.8	7348.83	14966	43476	415.66	532.99	1990.57	9228	6183.6	4177.01
2007-04-18	20777.1	1959.68	1328.63	1534.58	17667.3	13672.2	3612.4	3400.41	10401.6	1043.31	8003.31	12803.8	13712	48710	2510.5	2211.96	29559.5	9634.87	1472.5	2232.97	531.24	4662.93	4576.41	5835.95	6449.4	7282.34	14870.4	43286	413.35	527.25	1965.09	9278.5	6215	4193.57
2007-04-19	20299.7	1918.35	1306.36	1513.66	17372	13619.7	3449.02	3291.28	9857.23	1044.43	7888.63	12808.6	13574.7	48762	2505.35	2200.27	29614	9601.69	1470.73	2207.54	528.66	4669.31	4549.94	5829.04	6440.6	7242.73	14821.7	42974	411.3	525.64	1926.38	9256.8	6148.3	4180.64
2007-04-20	20566.6	1968.73	1315.37	1533.08	17452.6	13897.4	3584.2	3360.67	10258.6	1043.31	7942.67	12962	13664.7	49408	2526.39	2216.6	29832.5	9697.34	1484.35	2219.49	536.36	4717.36	4630.43	5938.9	6486.8	7342.54	15080.9	43549	416.27	533.23	1971.66	9399.8	6187.2	4182.9
2007-04-23	20556.6	1986.73	1321.36	1544.35	17455.4	13928.3	3710.89	3388.48	10685.1	1056.86	8010.46	12919.4	13629	49162	2523.67	2192.42	29593.8	9660.56	1480.93	2209.89	535.47	4740.52	4612.5	5917.32	6479.7	7335.62	14987.1	43466	415.9	538.81	1973.67	9438.1	6192.2	4201.64
2007-04-24	20572.8	1981.57	1317.5	1556.71	17451.8	14136.7	3720.53	3374.52	10669	1056.86	8045.01	12953.9	13590.3	49071	2524.54	2181.16	29544.2	9648.5	1480.41	2201.43	532.56	4720.46	4612.31	5886.03	6429.5	7270.32	14578.7	43303	410.48	535.46	1966.59	9392.4	6173.3	4163.11
2007-04-25	20536.8	1986.67	1315.97	1545.55	17236.2	14217.8	3743.96	3362.68	10668.3	1063.04	7984.65	13089.9	13672.9	49676	2547.89	2185.46	29444.2	9746.57	1495.42	2217.11	535.33	4750.61	4641.23	5947.33	6461.9	7343.08	14620.4	43755	411.01	537.8	1973.48	9429.3	6173.3	4163.11
2007-04-26	20667.3	2016.03	1315.97	1553.13	17429.2	14228.9	3783.06	3406.89	10848.8	1074.12	8000.04	13105.5	13597.5	49068	2554.46	2188.81	29342.7	9715.49	1494.25	2197.25	534.04	4823.74	4657.98	5944.44	6461.4	7387.02	14611	43844	413.82	540.98	1960.4	9481.3	6197.8	4174.9
2007-04-27	20526.5	2019.68	1324.77	1542.52	17400.4	13908.6	3759.87	3398.6	10688.5	1063.04	7949.42	13120.9	13632	49230	2557.21	2197.77	29372.9	9705.36	1494.07	2204.99	530.49	4809.5	4643.43	5930.77	6418.7	7378.12	14403.6	43642	411.35	537.63	1915.27	9419.9	6141	4181.45
2007-04-28	20526.5	2019.68	1324.77	1542.52	17400.4	13908.6	3759.87	3398.6	10688.5	1063.04	7949.42	13120.9	13632	49230	2557.21	2197.77	29372.9	9705.36	1494.07	2204.99	530.49	4809.5	4643.43	5930.77	6418.7	7378.12	14403.6	43642	411.35	537.63	1935.51	9419.9	6141	4181.45
2007-04-30	20319	1999.17	1322.25	1542.24	17400.4	13872.4	3841.27	3361.29	10865.9	1066.56	7875.42	13062.9	13416.7	48956	2525.09	2154.55	28996.7	9627.73	1482.37	2195.28	530.81	4738.51	4614.76	5960.04	6449.2	7408.87	14374.6	43755	413.89	541.01	1935.51	9428.3	6158.3	4194.64
2007-05-01	20319	2001.18	1322.25	1542.24	17275	13872.4	3841.27	3361.29	10865.9	1078.91	7875.42	13136.1	13406.3	48956	2531.53	2154.55	28996.7	9639.79	1486.3	2185.16	530.81	4738.51	4614.76	5960.04	6419.6	7408.87	14374.6	43755	413.89	541.01	1935.51	9428.3	6140.2	4191.66
2007-05-02	20388.5	2008.56	1322.25	1553.3	17394.9	13872.4	3841.27	3417.81	10865.9	1084.57	7903.04	13211.9	13578.7	49472	2557.84	2156.84	29259.9	9718	1495.92	2208.54	532.23	4719.97	4675.87	5990.13	6484.5	7455.93	14416.9	43836	413.14	546.81	1911.69	9445	6224.5	4186.99
2007-05-03	20681.6	2025.64	1342.79	1559.86	17394.9	14078.2	3841.27	3450.64	10865.9	1082.29	7926.66	13241.4	13687	50218	2565.46	2174.77	29753	9753.94	1502.39	2223.4	536.12	4732.26	4706.52	6004.28	6537.8	7476.69	14395.6	43685	410.18	547.31	1923.19	9393	6236.9	4202.67
2007-05-04	20841.1	2033.37	1363.4	1567.74	17394.9	13934.3	3841.27	3485.76	10865.9	1082.29	8066.06	13264.6	13769.9	50598	2572.15	2163.73	30013.8	9793	1505.62	2243.17	539.64	4726.88	4719.26	6068.83	6603.7	7516.76	14620.3	43973	413.16	553.02	1930.05	9455.5	6296.2	4206.31
2007-05-07	20896.6	2037.04	1365.28	1584.46	17669.8	13879.2	3841.27	3477.59	10865.9	1094.14	8115.27	13313	13865.5	50282	2570.95	2132.28	29776.6	9825.09	1509.48	2252.01	540.03	4723.69	4739.58	6071.48	6603.7	7525.69	14672.1	43948	415.69	555.05	1927.58	9455.5	6329.4	4202.58
2007-05-08	20706.3	2022.79	1354.67	1582.65	17656.8	13765.5	3950.01	3439.21	11401.1	1081.45	8095.84	13309.1	13915.4	50278	2571.75	2131.65	29572.4	9788.03	1507.72	2242.97	535.7	4684.22	4708.3	6034.25	6550.4	7442.2	14556.7	43630	406.38	542.14	1913.57	9377.1	6301	4223.23
2007-05-09	20844.8	2037.98	1350.84	1593.42	17748.1	13781.5	4013.09	3452.72	11517.8	1087.42	8052.7	13362.9	13895.2	51300	2576.34	2155.26	29992.8	9827.93	1512.58	2239.36	534.3	4724.22	4715.41	6051.63	6549.6	7475.99	14609.4	43855	405.91	543.61	1913.57	9427.7	6338	4232.33
2007-05-10	20746.3	2047.03	1355.62	1599.68	17737	13771.2	4049.7	3469.26	11574.2	1099.58	8096.86	13215.1	13853.1	50235	2533.74	2098.09	29653.8	9669.37	1491.47	2217.33	529.23	4679.09	4674.61	6012.76	6524.1	7415.33	14575.4	43433	401.04	543.42	1892.15	9367.3	6351.8	4251.4
2007-05-11	20468.2	2022.3	1351.45	1603.56	17553.7	13796.2	4021.68	3446.92	11489.9	1087.42	8031.54	13326.2	14003.8	50902	2562.22	2128.25	30058.8	9787.03	1505.85	2243.49	531.2	4667.71	4667.12	6050.63	6565.7	7479.34	14736.3	43590	405.76	537.35	1845.44	9408.3	6297.3	4226.39
2007-05-14	20979.2	2044.21	1359.59	1605.77	17677.9	13965.9	4046.39	3501.1	11732.1	1110.26	8030.56	13346.8	13903.3	50511	2546.44	2127.69	29766.3	9765.38	1503.15	2235.68	529.89	4681.81	4658.76	6026.42	6555.5	7459.61	14686	43629	408.53	538.97	1851.22	9387.3	6346.7	4238.94
2007-05-15	20868.2	2037.78	1346.1	1589.37	17513	13929.3	3899.18	3475.08	11414.5	1111.38	7975.03	13383.8	13934.6	50518	2525.29	2139.64	29619.9	9764.73	1501.19	2250.39	531.39	4717.51	4662.46	6049.76	6568.6	7505.35	14824.2	44022	409.27	544.22	1826.39	9391	6297.3	4214.78
2007-05-16	20937.2	2063.76	1352.41	1600.6	17529	14127.3	3986.04	3501.17	11682.4	1111.98	7988.57	13487.5	14025	51738	2547.42	2162.89	30341.2	9825.43	1514.14	2259.73	527.55	4767.25	4673.3	6017.91	6559.5	7481.25	14918.8	43802	409.59	545.17	1856.57	9357.5	6301.1	4227.46
2007-05-17	20994.6	2063.76	1359.37	1615.58	17498.6	14299.7	4048.29	3525.51	12011.1	1101.31	8037.96	13476.7	14100.7	51631	2539.38	2171.63	30478.4	9818.98	1512.75	2266.77	531.53	4767.25	4690.25	6027	6579.3	7499.5	14968.2	43964	409.59	545.17	1843.24	9357.5	6370.1	4275.57
2007-05-18	20904.8	2063.76	1356.84	1612.25	17399.6	14303.4	4030.26	3512.4	12100.1	1111.98	8034.14	13556.5	14105.3	52078	2558.45	2186.39	30676.3	9893.74	1522.75	2296.95	536.69	4818.82	4749.45	6101.14	6640.9	7607.54	15068.4	44364	413.42	554.08	1859.7	9424.7	6319.7	4280.43
2007-05-21	20927.8	2071.27	1347.17	1628.2	17556.9	14418.6	4072.23	3514.49	12269.2	1087.11	8141.59	13542.9	14105.3	52423	2578.79	2209.08	30708.7	9897.46	1525.1	2298.24	538.38	4817.47	4728.63	6089.91	6636.8	7619.31	15055.5	43495	412.51	559.5	1866.72	9405.3	6372.5	4289.71
2007-05-22	20843.9	2078.75	1367.51	1642.88	17680	14453.7	4110.38	3539.82	12407.8	1087.11	8188.63	13540	14112.2	52208	2588.02	2193.47	30802.2	9900.96	1524.12	2316.64	540.57	4825.25	4730.17	6089.72	6606.6	7659.39	15070.9	43328	411.22	561.38	1860.83	9361.1	6350.2	4289.59
2007-05-23	20799	2104.25	1354.98	1646.59	17705.1	14363.3	4173.71	3559.01	12624.1	1087.11	8221.79	13525.6	14142.5	51813	2577.05	2196.1	30869.8	9913.66	1522.28	2314.67	541.61	4883.43	4756.82	6120.2	6616.4	7735.88	15223.9	43567	417.79	566.04	1815.64	9438.8	6369	4312.58
2007-05-24	20799	2078.6	1340.98	1646.59	17697	14218.1	4151.13	3530.26	12515.1	1093.44	8216.41	13441.1	13946.3	50531	2537.92	2172.35	30338.6	9812.51	1507.51	2300.62	535.99	4867.77	4704.55	6048.31	6565.4	7697.38	15094.9	42940	415.85	564.85	1790.53	9357	6298.6	4333.24
2007-05-25	20520.7	2060.43	1339.08	1644.56	17481.2	14338.5	4179.78	3486.63	12681.5	1087.11	8159.97	13507.3	14024.1	51618	2557.19	2172.35	30700	9876.11	1515.73	2320.33	535.48	4857.3	4671.71	6057.49	6570.5	7739.2	15053.2	43019	415.13	559.18	1794.76	9381.3	6273.3	4305.25
2007-05-28	20529.8	2076.76	1339.08	1657.91	17587.6	14397.9	4272.11	3513.37	13026.7	1112.97	8156.82	13507.3	14073.7	52120	2557.19	2192.94	30928.4	9876.11	1515.73	2320.33	537.56	4857.3	4689.51	6071.47	6570.5	7739.2	15124.6	43166	417.34	559.18	1770.42	9381.3	6275	4304.41
2007-05-29	20469.6	2058.74	1343	1661.8	17672.6	14508.2	4334.92	3527.08	13456.6	1112.97	8181.49	13521.3	13962.7	51713	2572.06	2202.4	30664.7	9892.49	1518.11	2342.06	537.19	4884.6	4660.33	6056.39	6606.5	7781.04	15188.6	42966	416.57	557.26	1737.56	9396	6338.8	4308.99
2007-05-30	20293.8	2055.4	1339.18	1662.72	17588.3	14411.4	4053.09	3511.13	12627.1	1107.96	8147.34	13633.1	14081.7	52528	2592.59	2222.22	31380	9963.61	1530.23	2351.76	535.01	4823.8	4652.66	6042.15	6602.1	7764.97	15137.3	42964	414.06	554.45	1724.69	9382.8	6271.7	4279.62
2007-05-31	20634.5	2084.32	1346.89	1700.91	17875.8	14544.5	4109.65	3511.13	12944.2	1117.02	8144.95	13627.6	14056.8	52268	2604.52	2243.03	31399	9978.64	1530.62	2363.21	540.39	4885.38	4697.86	6104	6621.4	7883.04	15329.4	43079	419.1	563.87	1780.33	9450.8	6341.8	4302.35
2007-06-01	20602.9	2084.32	1360.07	1716.24	17958.9	14570.8	4000.74	3548.32	12432.7	1117.02	8249.9	13668.1	14119.4	53423	2613.92	2249.36	31946.4	10042.6	1536.34	2386.17	543.93	4916.94	4707.5	6168.15	6676.7	7987.85	15501.5	43079	419.1	563.87	1829.5	9531.5	6363.4	4296.43
2007-06-04	20729.6	2111.75	1360.27	1737.59	17973.4	14495.8	3670.4	3579.35	11468.5	1123.22	8294.79	13676.3	14146.7	53243	2618.29	2240.65	32096.2	10064	1539.18	2391.25	545.69	4914.93	4690.78	6125.81	6664.1	7976.79	15414.3	42726	421.12	568.84	1826.99	9487.5	6419.6	4296.43
2007-06-05	20842.2	2093.11	1369.59	1742.19	18053.8	14535	3767.1	3572.9	12017.7	1129.3	8303.99	13595.5	14141.7	53162	2611.23	2234.74	32271.4	10001.5	1530.95	2371.07	544.75	4872.31	4676.43	6078.54	6632.8	7919.83	15314.9	42931	420.18	567.33	1833.66	9408.2	6399.9	4312.11
2007-06-06	20818.6	2102.44	1372.38	1742.19	18040.9	14255.9	3776.32	3563.75	12338.2	1117.95	8314.68	13465.7	13941.6	52049	2587.18	2206.16	31681.8	9895.01	1517.38	2358.14	537.51	4780.61	4587.92	5977.87	6522.7	7730.05	14928.8	42307	420.18	557.56	1823.63	9277.5	6367.4	4294.21
2007-06-07	20800.2	2093.81	1364.41	1753.04	18053.4	14186.2	3890.8	3546.33	12696	1105.65	8355.26	13266.7	13703.9	52049	2541.38	2158.82	31184.5	9720.94	1490.72	2306.62	535.05	4780.61	4511.39	5890.49	6505.1	7618.61	14725.9	41926	404.38	554.03	1803.59	9152.1	6338.2	4234.63
2007-06-08	20509.2	2054.45	1352.39	1727.28	17779.1	14063.8	3913.14	3491.59	12850.7	1117.95	8300.71	13424.4	13798.5	52330	2573.54	2169.28	31466.6	9826.07	1507.67	2311.76	534.69	4766.94	4507.9	5883.29	6505.1	7590.5	14816.5	41712	406.51	551.44	1790.09	9150.7	6258.4	4183.45
2007-06-09	20509.2	2054.45	1352.39	1727.28	17779.1	14063.8	3913.14	3491.59	12850.7	1117.95	8300.71	13424.4	13798.5	52330	2573.54	2169.28	31466.6	9826.07	1507.67	2311.76	534.69	4766.94	4507.9	5883.29	6505.1	7590.5	14816.5	41712	406.51	551.44	1798.49	9150.7	6258.4	4183.45
2007-06-11	20615.5	2084.03	1357.66	1716.56	17834.5	14083.4	3995.68	3545.46	13187.7	1104.52	8338.88	13425	13832.8	52777	2572.15	2162.1	31833.4	9841.73	1509.12	2322.41	537.8	4834.44	4565.77	5940.09	6567.5	7706.1	14940.6	41874	410.41	556.46	1798.49	9223	6258.4	4205.52
2007-06-12	20636.4	2108.58	1360.58	1729.88	17760.9	14131	4072.14	3561.54	13579.7	1088.15	8370.26	13295	13724.3	51797	2549.77	2147.11	31608.6	9724.49	1493	2299.99	534.11	4798.2	4549.01	5898.16	6520.4	7678.26	14764.3	41683	405.87	551.13	1798.49	9181	6267.7	4227.56
2007-06-13	20578.8	2088.6	1353.03	1721.99	17732.8	14003	4176.48	3551.22	13811.5	1087.5	8346.39	13482.4	13859.5	52994	2582.31	2168.43	31884.1	9863.5	1515.67	2314.39	536.4	4789.44	4571.67	5934.27	6559.6	7680.76	14829.8	41930	407.47	552.73	1806.68	9146.1	6210.1	4194.57
2007-06-14	20867.2	2108.41	1357.18	1769.18	17842.3	14203.7	4115.21	3573.43	13666.3	1098.83	8450.72	13553.7	14002	53713	2599.41	2193.03	32114.1	9926.79	1522.97	2332.62	545.34	4907.4	4640.15	6047.23	6649.9	7849.16	15078.4	42597	414.65	566.54	1870.11	9292.3	6288.4	4193.67
2007-06-15	21017	2120.64	1360.65	1772.26	17971.5	14162.7	4132.87	3581.16	13697.2	1123.13	8573.64	13639.5	14137.4	54519	2626.71	2216.58	32129	10013.9	1532.91	2337.25	551.91	4967.61	4681.67	6105.28	6732.4	8030.64	15252.1	43099	417.23	577.55	1883.27	9395.8	6317.1	4212.46
2007-06-18	21582.9	2126.49	1372.28	1806.88	18149.5	14080.1	4253.35	3623.79	14194.5	1115.98	8573.64	13613	14176.4	54730	2626.6	2216.58	32218.2	10005.5	1531.05	2342.78	551.27	4945.34	4676.26	6087.15	6703.5	8036.12	15103.6	42719	419.78	579.17	1896.67	9365.7	6365.3	4303.18
2007-06-19	21582.9	2142.19	1376.79	1807.85	18163.6	14295.5	4269.52	3629.55	14336.4	1113.96	8573.64	13635.4	14119.5	54644	2626.76	2239.69	32065	10026.5	1533.7	2339.01	550.36	4923.29	4653.33	6071.67	6650.2	8033.52	15000.2	42845	416.72	580.16	1886.84	9333.4	6393.4	4310.12
2007-06-20	21684.7	2161.07	1386.27	1783.79	18211.7	14412	4181.32	3628.67	14107.2	1115.93	8755.88	13489.4	13978.2	54029	2599.96	2226.01	31550.8	9905.08	1512.84	2330.13	552.14	4956.25	4676.9	6093.29	6649.3	8090.49	15035.7	42769	417.31	581.85	1915.44	9347.3	6421	4323.17
2007-06-21	21954.7	2152.34	1387.96	1794.24	18240.3	14499.2	4230.82	3639.49	14255.6	1110.95	8851.99	13545.8	14095.7	54657	2616.96	2235.04	31830.8	9960.79	1522.19	2327.54	550.54	4903.17	4646.73	6029.79	6596	7964.71	14882.4	42407	409.71	580.96	1893.22	9230.3	6411.9	4300.57
2007-06-22	21999.9	2152.32	1391.57	1770.98	18188.6	14467.4	4091.45	3615.38	13725.7	1115.93	8846.39	13360.3	13986	54267	2588.96	2229.9	31642.3	9848.97	1502.56	2316.95	548.75	4906.93	4641.55	6023.25	6567.4	7949.63	14784.9	42154	409.71	579.44	1896.1	9166.5	6409.3	4285.14
2007-06-25	21822.3	2152.2	1377.13	1757.73	18087.5	14487.7	3941.08	3580.33	13109.3	1111.06	8939.19	13352	13841.9	54042	2577.08	2202.91	31296	9807.18	1497.74	2307.04	548.22	4834.25	4642.42	6002.85	6588.4	7930.61	14848.3	42114	408.15	576.74	1875.32	9141.2	6358.6	4270.91
2007-06-26	21803.6	2153.54	1366.99	1749.55	18066.1	14501.1	3973.37	3525.1	13219.4	1110.61	8865.75	13337.7	13663.9	53852	2574.16	2195.64	30744.7	9774.29	1492.89	2326.49	543.26	4805.12	4599.5	5953.36	6559.3	7860.52	14755.2	41624	406.39	574.32	1897.3	9073.3	6337.3	4252.03
2007-06-27	21705.6	2125.34	1357.43	1733.1	17849.3	14501.1	4078.6	3505.5	13583.7	1100.11	8844.22	13427.7	13741.9	54143	2605.35	2227.33	30804.2	9848.91	1506.34	2349.15	539.62	4764.03	4572.91	5941.67	6527.6	7801.23	14681.7	41439	405.1	566.97	1875.21	9025.8	6216.6	4203.27
2007-06-28	21938.2	2112.85	1350.72	1751.75	17932.3	14504.6	3914.2	3538.23	12882.2	1102.19	8892.83	13422.3	13715.7	54147	2608.37	2216.09	31079.2	9865.77	1505.71	2346.41	546.02	4817.05	4610.2	6006.31	6571.3	7921.36	14819.9	41704	410.54	580.18	1894.16	9138.9	6297.4	4189.66
2007-06-29	21772.7	2139.28	1354.38	1743.6	18138.4	14650.5	3820.7	3548.2	12546.5	1100.11	8883.21	13408.6	13906.6	54392	2603.23	2190.87	31151	9873.02	1503.35	2356.38	548.21	4869.26	4639.4	6054.93	6607.9	8007.32	14892	41954	410.21	586.86	1897.7	9209.4	6310.6	4234.29
2007-07-02	21772.7	2167.82	1364.37	1771.35	18146.3	14664.3	3836.29	3550.34	12475.2	1112.14	8939.49	13535.4	13906.6	55371	2632.3	2234.8	31420.7	9997.43	1519.43	2359.39	549.84	4873.11	4591.71	6026.95	6590.6	7958.24	14804.7	41987	410.08	588.81	1911.75	9192.6	6298.6	4228.01
2007-07-03	22151.1	2189.12	1373.14	1805.5	18149.9	14806.5	3899.72	3569.43	12761.1	1127.83	8996.2	13577.3	14064.7	55700	2644.95	2230.61	32117.8	10032.6	1524.87	2361.76	553.04	4905.02	4635.3	6069.84	6639.8	8050.68	14869.4	42372	415.73	589.79	1939.84	9240.3	6333.8	4233.74
2007-07-04	22218.5	2196.1	1377.14	1838.41	18168.7	14880.2	3816.17	3554.85	12509.1	1135.19	9068.98	13577.3	14060.4	55696	2644.95	2252.4	32201.6	10032.6	1524.87	2361.76	554.25	4932.36	4657.94	6098.08	6673.1	8075.26	14989.7	42408	417.34	594.15	1943.29	9294.5	6332.6	4240.26
2007-07-05	22253	2220.93	1369.3	1847.79	18221.5	14861.9	3615.87	3551.68	11783.6	1134.18	9148.78	13565.8	14079.4	55932	2656.65	2247.15	32177.8	10026.2	1525.4	2381.96	550.8	4933.57	4640.24	6059.53	6635.2	7987.13	14907.4	42043	415.94	595.9	1973.12	9219.4	6392.2	4236.71
2007-07-06	22531.7	2227.05	1373.84	1861.01	18140.9	14964.1	3781.35	3561.96	12395.4	1134.18	9188.31	13611.7	14118.7	56444	2666.51	2249.01	32411.8	10075.4	1530.44	2384.62	555	4971.37	4655.56	6102.69	6690.1	8048.32	15058.3	42279	417.31	593.45	1974.66	9264	6383	4223.53
2007-07-09	22817.4	2271.34	1378.69	1883.59	18262	15045.7	3883.22	3626.72	12846.4	1140.74	9369.84	13650	14177.5	56444	2670.02	2249.01	32088.2	10099.6	1531.85	2391.2	557.43	4981.87	4656.53	6104.66	6712.7	8077.39	14974.7	42545	421.09	595.77	1999.87	9296.4	6429.5	4238.65
2007-07-10	22885.8	2282.38	1371.45	1894.53	18252.7	15009.9	3853.02	3620.32	12682	1132.27	9384.73	13501.7	14131.9	55883	2639.16	2253.3	31743	9953.57	1510.12	2358.9	554.95	4936.94	4616.6	6019.22	6630.9	7964.76	14823.9	42039	419.13	592.54	1977.85	9248.4	6397.8	4236.85
2007-07-11	22607	2273.42	1359.27	1889.96	18049.5	14910.6	3865.72	3594.94	12785.7	1132.44	9290.95	13577.9	14166.1	56356	2651.79	2266.09	31916.3	10014.7	1518.76	2381.63	553.56	4868.09	4590.23	6001.09	6615.1	7898.54	14766.2	41795	419.14	591.55	1995.58	9214.4	6363.2	4229.69
2007-07-12	22809	2284.92	1366.02	1909.75	17984.1	15092	3915.99	3624.56	12850.7	1145.11	9354.41	13861.7	14356	57613	2701.73	2289.13	32261.1	10197.7	1547.7	2397.08	560.14	4918.18	4636.57	6103.05	6697.7	8053.43	14941.8	42140	425.51	598.96	2049.18	9248.5	6400.1	4238.54
2007-07-13	23099.3	2301.6	1384.72	1962.93	18239	15272.7	3914.4	3654.61	12816.4	1145.11	9471.3	13907.2	14496.5	57644	2707	2287.82	32386.5	10220.7	1552.5	2392.52	560.93	4926.07	4645.08	6117.96	6716.7	8092.77	15023.5	42293	426.09	601.48	2061.4	9261.7	6425.4	4243.66
2007-07-16	22953.9	2286.22	1381.51	1949.51	18239	15311.2	3821.92	3653.23	12331.2	1149.1	9417.32	13951	14338.2	57374	2697.33	2248.85	32265.9	10188.2	1549.52	2389.82	561.9	4925.07	4637.18	6125.6	6697.7	8105.69	15110.4	42367	427.24	601.68	2066.74	9299.8	6418.4	4240.36
2007-07-17	23057.3	2301.34	1377.48	1949.51	18217.3	15289.8	3896.19	3651.05	12760	1147.62	9509.73	13971.5	14382	57660	2712.29	2251.59	31979.1	10170.4	1549.37	2385.33	560.79	4872.98	4594.5	6099.21	6659.1	8038.21	15153.8	42106	423.85	598.39	2055.21	9219.3	6418.2	4258.84
2007-07-18	22841.9	2294.59	1369.23	1930.7	18015.6	15301.2	3930.06	3583.97	12841.5	1143.3	9485.35	13918.2	14583.7	57556	2699.49	2247.83	31886.7	10148.3	1546.17	2388.04	555.63	4830.17	4568.99	5995.97	6567.1	7893.61	15058.6	41755	421.42	597.16	2036.59	9074.1	6367.2	4255.64
2007-07-19	23016.2	2333.68	1376.4	1937.9	18116.6	15550.1	3912.94	3604.62	12790.9	1150.78	9473.31	14000.4	14625.8	58125	2720.04	2287.57	32150.7	10194	1553.08	2387.21	560.25	4888.06	4607.47	6065.5	6640.2	7991.21	15207.3	42121	424.37	605.05	2071.08	9189.3	6419	4294.26
2007-07-20	23291.9	2366.4	1382.36	1983.54	18157.9	15565.5	4058.85	3651.38	13418	1143.3	9585.9	13851.1	14582.9	57443	2687.6	2277.47	31922.6	10072.9	1534.1	2373.28	555.02	4834.23	4579.36	5957.16	6585.2	7874.85	14930.1	41473	419.18	601.19	2069.93	9105.5	6456.7	4320.27
2007-07-23	23365.6	2380.21	1381.53	1993.05	17963.6	15732.2	4213.36	3635.35	14139.3	1149.57	9621.57	13943.4	14468.3	58037	2690.58	2303.43	32168.4	10121.6	1541.57	2368.81	558.95	4866.04	4610.11	6009.16	6624.4	7944.21	15056.7	41757	421.56	601.05	2091.26	9117.5	6427.8	4306.54
2007-07-24	23472.9	2401.14	1392.18	1992.26	18002	15794.9	4210.33	3665.13	14191	1149.57	9744.06	13717	14068.2	55795	2639.86	2241.43	31462.2	9909.95	1511.04	2337.27	551.59	4820.26	4542.17	5907.47	6498.7	7806.79	14913.3	40966	415.76	588.32	2050.15	9047.7	6455.5	4321.29
2007-07-25	23362.2	2394.56	1379.73	2004.22	17858.4	15699.3	4323.97	3633.54	14403.1	1145.9	9740.13	13785.8	14105.3	56001	2648.17	2242.78	31103.5	9930.36	1517.91	2350.93	546.88	4786.28	4484.58	5837.11	6454.3	7692.55	14937.7	40503	409.8	584.66	2047.82	8922.7	6378	4324.97
2007-07-26	23211.7	2365.26	1381.5	1963.54	17702.1	15776.3	4346.46	3579.73	14619.7	1116.58	9566.42	13473.6	13844.6	53893	2599.34	2153.27	29996.6	9654.38	1482.66	2294.97	533.04	4628	4369.97	5675.05	6251.2	7508.96	14540.4	39671	396.57	571.05	1996.91	8706.4	6301.4	4325.78
2007-07-27	22570.4	2298.41	1355.38	1883.22	17283.8	15234.6	4345.36	3492.7	14614.1	1145.9	9162.28	13265.5	13748.5	52922	2562.24	2149.89	30235.2	9508.23	1458.95	2247.82	526.69	4567.11	4341.99	5643.96	6215.2	7451.68	14587.5	39581	395.41	562.03	1967.06	8705.6	6127.3	4246.01
2007-07-30	22739.9	2301.55	1352.41	1906.71	17289.3	15260.9	4440.77	3526.29	15060.9	1083.64	9072.57	13358.3	13864.7	54573	2583.28	2186.37	30900.7	9623.18	1473.91	2250.16	525.76	4534.27	4336.03	5646.36	6206.1	7456.31	14507.9	39539	398.72	564.02	1961.04	8705.1	6146.5	4228.83
2007-07-31	23184.9	2348.67	1373.71	1933.27	17248.9	15551	4471.03	3547.66	15199.6	1103.94	9287.25	13212	13868.6	54183	2546.27	2180.25	30659.7	9554.5	1455.27	2270.66	533.99	4685.24	4384.47	5751.08	6360.1	7584.14	14802.4	40221	404.15	573.36	1993.96	8885	6187.5	4213.3
2007-08-01	22455.4	2256.31	1339.49	1856.45	16871	14935.8	4300.56	3431.71	14795.2	1075.52	8891.88	13362.4	13654.7	54234	2553.87	2177.19	30048.4	9573.05	1465.81	2255.8	524.45	4617.86	4311.8	5654.3	6250.6	7473.93	14595.7	39401	396.71	561.26	1946.34	8885	5989.4	4158.39
2007-08-02	22443.2	2270.85	1333.28	1853.07	16984.1	14985.7	4407.73	3435.46	15562.1	1073.32	8950.57	13463.3	13813.6	54691	2575.98	2186.64	30394.8	9619.33	1472.2	2273.49	527.76	4674.63	4326.28	5682.07	6300.3	7534.13	14678.6	39710	400.58	564.77	1956.61	8775.7	6050.3	4138.2
2007-08-03	22538.4	2269.79	1335.42	1876.8	16979.9	15138.4	4560.77	3436.04	16179.6	1075.52	9057.82	13181.9	13565.2	52846	2511.25	2148.42	29671.8	9370.6	1433.06	2237.97	521.52	4618.43	4281.14	5597.89	6224.3	7435.67	14534.3	39375	395.76	555.94	1970.75	8671.4	6055.9	4122.41
2007-08-06	21936.7	2189.11	1290.9	1855.05	16914.5	14903	4628.11	3308.99	16542.8	1038.27	8941.73	13468.8	13565.2	53091	2547.33	2107.81	29721.6	9553.77	1467.67	2246.82	516.039	4552.34	4234.99	5532.99	6189.1	7444.45	14432.1	39116	388.83	540.56	1944.73	8639.9	5949.5	4075.19
2007-08-07	21908	2174.07	1290.13	1859.82	16921.8	14932.8	4651.23	3302.01	16523.3	1049.71	8862.31	13504.3	13560.6	53802	2561.6	2121.51	30239.9	9606.07	1476.71	2248.46	521.429	4585.47	4281.01	5620.4	6308.8	7513.66	14652.9	39862	392.79	546.71	1951.8	8747	6013.6	4136.24
2007-08-08	22536.7	2262.64	1307.17	1903.41	17029.3	15308	4663.16	3413.17	16193.7	1074.86	9099.46	13657.9	13758.2	55241	2612.98	2158.44	30661.9	9746.2	1497.49	2281.52	530.98	4661.17	4320.87	5749.29	6393.9	7605.94	15004.2	40645	401.45	561.96	1987.25	8964.2	6124.7	4116.85
2007-08-09	22439.4	2241.4	1313.39	1908.68	17170.6	15100.1	4754.1	3413.17	16680.4	1055.36	9182.6	13270.7	13478	53431	2556.49	2087.68	29884	9449.31	1453.09	2242.86	517.85	4591.48	4214.92	5624.78	6271.2	7453.59	14838.3	40056	391.09	545.93	1939	8805.3	6187.7	4160.43
2007-08-10	21792.7	2207.4	1287.7	1828.49	16764.1	14868.2	4749.37	3359.18	16323.4	1055.36	8931.31	13239.5	13466.3	52638	2544.89	2053.13	29420.5	9435.04	1453.64	2230.46	502.04	4434.68	4096.2	5448.63	6038.3	7343.26	14453.9	38994	378.72	532.13	1897.2	8565.5	5965.2	4109.84
2007-08-13	21891.1	2211.46	1296.48	1849.26	16800	15017.2	4820.06	3380.61	16116.1	1065.08	8938.96	13236.5	13427.5	52434	2542.24	2065.82	29607.2	9428.86	1452.92	2240.2	513.25	4545.63	4185.19	5569.28	6219	7474.33	14731.8	39573	389.33	542.9	1927.63	8687.5	6027.5	4070.16
2007-08-14	22007.3	2168.64	1288.34	1817.89	16844.6	15000.9	4872.79	3386.59	16351.9	1059.42	8910.99	13028.9	13242.6	50912	2499.12	2029.68	28895.7	9254.27	1426.54	2193.11	508.43	4529.48	4126.61	5478.66	6143.5	7425.07	14553.1	39247	386.31	542.9	1925.79	8549.3	5982.5	4065.68
2007-08-15	21375.7	2029.08	1251.82	1817.89	16475.6	15000.9	4869.88	3273.25	16322.5	1044.36	8593.04	12861.5	13048.8	49285	2458.83	1924.73	28140.7	9089.04	1406.7	2153.69	506.04	4529.48	4114.89	5442.72	6109.3	7445.9	14520.5	39247	382.33	531.44	1886.83	8661.6	5801.5	4004.46
2007-08-16	20672.4	1908.64	1207.61	1691.98	16148.5	14358.2	4765.45	3152.16	16053.1	1008.17	8201.37	12845.8	12848.7	48016	2451.07	1833.71	27793.2	9087.1	1411.27	2125.91	487.06	4297.28	3989.06	5265.47	5858.9	7270.07	13979.7	37921	369.49	510.06	1820.3	8422.3	5712.2	3957.94
2007-08-17	20387.1	1908.64	1191.55	1638.07	15273.7	14141.5	4656.57	3130.71	15689	1008.17	8090.29	13079.1	13049.6	48559	2505.03	1929.12	28510.7	9314.99	1445.94	2160.08	499	4283.05	4070.48	5363.63	6064.2	7378.29	14237.5	38712	375.11	523.539	1860.7	8543	5670.3	3894.34
2007-08-20	21595.6	2041.58	1243.39	1731.27	15732.5	14427.5	4904.85	3322.38	16589.8	1025.91	8515.6	13121.4	13110.3	49206	2508.59	1929.12	28453.5	9326.21	1445.55	2171.44	504.57	4354.93	4117.02	5399.38	6078.7	7407.53	14269.1	38909	379.67	531.87	1852.15	8594.3	5926.5	3982.38
2007-08-21	21729.3	1993.01	1231.48	1736.18	15901.3	13989.1	4955.21	3228.66	16860	1013.2	8479.08	13090.9	13238.7	49815	2521.3	1962.76	28568.4	9332.54	1447.12	2180.61	505.61	4323.71	4116.98	5418.78	6086.1	7424.75	14239.8	38953	378.09	524.12	1820.65	8603.2	5978.6	4027.79
2007-08-22	22346.9	2062.99	1255.39	1759.5	15900.6	14248.7	4980.08	3321.5	17332	1027.91	8493.46	13236.1	13463.1	51745	2552.8	2008.5	29269.3	9477.13	1464.07	2205.49	514.299	4435.6	4171.02	5518.17	6196	7500.48	14359.2	39590	385.35	533.8	1853.77	8714.6	5997.4	4033.27
2007-08-23	22967	2117.66	1283.62	1799.72	16316.3	14164	5032.49	3370.91	17639.2	1035.6	8732.84	13235.9	13451.1	51848	2541.7	2038.29	29459.8	9478.62	1462.5	2215.8	514.75	4484.26	4184.94	5523.33	6196.9	7511.96	14292.5	39709	387.5	537.83	1864.59	8738.5	6149.7	4089.12
2007-08-24	22921.9	2143.11	1273.52	1791.33	16249	14424.9	5107.67	3369.45	17864.7	1027.68	8690.09	13378.9	13520.3	52998	2576.69	2081.45	30041.5	9607.04	1479.37	2248.49	518.1	4508.72	4225.78	5569.38	6220.1	7507.27	14334.4	39954	391.51	539.89	1864.74	8775.9	6087.2	4052.45
2007-08-27	23577.7	2175.35	1278.27	1803.03	16301.4	14842.4	5150.12	3388.44	17884.8	1053.2	8718.31	13322.1	13487.4	53078	2561.25	2076.53	30275.8	9528.93	1466.79	2238.36	518.12	4535.99	4233.86	5590.54	6220.1	7485.99	14305.5	39936	389.69	537.64	1895.71	8846.2	6184.9	4084.44
2007-08-28	23363.8	2159.61	1278.95	1829.31	16287.5	14919.2	5194.69	3343	17817.9	1046.68	8727.55	13041.9	13264.9	51645	2500.64	1985.9	29326.8	9289.49	1432.36	2177.14	508.01	4497.22	4186.15	5474.17	6102.2	7430.24	14124.8	39158	380.83	526.98	1877.1	8714.7	6177.3	4101.07
2007-08-29	23020.6	2134.88	1263.7	1826.19	16012.8	14993	5109.43	3334.66	17443.2	1043.02	8643.32	13289.3	13490.1	52735	2563.16	2045.67	29710.8	9508.92	1463.76	2216.05	510.79	4483.09	4213.06	5520.02	6132.2	7439.18	14183.6	39492	385.5	529.04	1871.54	8727.8	6101.4	4084.17
2007-08-30	23484.5	2150.72	1273.93	1841.7	16153.8	15121.7	5167.88	3321.15	17659.2	1035.31	8771.21	13238.7	13444.6	52858	2565.3	2040.56	29744.1	9456.64	1457.64	2202.42	517.669	4513.48	4304.96	5592.53	6212	7519.94	14313.4	39842	389.3	538.94	1880.43	8776.7	6138	4107.6
2007-08-31	23984.1	2194.34	1273.93	1873.24	16569.1	15318.6	5218.83	3392.91	17872.1	1043.94	8982.16	13357.7	13660.5	54637	2596.36	2062.08	30347.9	9596.98	1473.99	2248.6	522.73	4579.61	4350.83	5662.7	6303.3	7638.17	14479.8	40187	393.25	548.42	1919.89	8881.5	6248.3	4118.97
2007-09-03	23904.1	2213.57	1284.14	1881.81	16524.9	15422	5321.06	3386.22	18164	1047.17	8979.96	13357.7	13660.5	54833	2596.36	2071.53	30797.6	9596.98	1473.99	2248.6	525.36	4583.87	4358.55	5651.27	6315.2	7648.58	14546.9	40281	395.78	550.46	1926.5	8877.8	6272.5	4125.76
2007-09-04	23886.1	2215.12	1283.75	1874.74	16420.5	15465.4	5294.05	3376.06	18050.8	1054.65	8922.98	13448.9	13755.2	55250	2630.24	2068.19	30932.7	9698.68	1489.42	2267.13	531	4674.36	4376.22	5672.72	6376.8	7721.77	14590.1	40324	396.59	556.11	1904.76	8966.3	6297.1	4150.53
2007-09-05	24069.2	2214.62	1297.93	1865.59	16158.5	15446.1	5310.72	3445.08	18002	1048.7	8913.85	13305.5	13683.3	54408	2605.95	2061.01	30809.5	9583.17	1472.29	2250.34	523.02	4580.49	4321.16	5551.55	6270.7	7588.03	14240.1	39347	388.08	556.28	1905.3	8843.1	6274.3	4155
2007-09-06	24050.4	2220.78	1298.85	1888.81	16257	15616.3	5393.66	3466.06	18073.8	1033.23	9017.08	13363.4	13795.7	54569	2614.32	2078.93	30817	9637.55	1478.55	2261.18	527.21	4567.91	4330.45	5576.62	6313.3	7621.72	14198.4	39435	386.27	559.83	1920.88	8830.1	6265.3	4140.09
2007-09-07	23982.6	2239.9	1304.9	1884.9	16122.2	15590.4	5277.18	3488.97	17674.1	1033.23	9018.08	13113.4	13651.2	54569	2565.7	2041.04	30252.8	9486.44	1453.55	2242.14	517.429	4487.09	4227.47	5430.1	6191.2	7436.63	13873.4	38494	376.66	552.51	1898.19	8676.1	6296.5	4151.98
2007-09-09	23982.6	2239.9	1304.9	1884.9	16122.2	15590.4	5277.18	3488.97	17674.1	1033.23	9018.08	13113.4	13651.2	54569	2565.7	2041.04	30252.8	9486.44	1453.55	2242.14	517.429	4487.09	4227.47	5430.1	6191.2	7436.63	13873.4	38494	376.66	552.51	1898.19	8676.1	6296.5	4151.98
2007-09-10	23999.7	2209.64	1290.7	1835.87	15765	15596.8	5355.29	3441.87	17918.5	1020.11	8937.58	13127.9	13625.5	52653	2559.11	2018.16	29893.2	9457.64	1451.7	2229.28	512.9	4427.15	4190.77	5386.43	6134.1	7375.44	13726.3	38407	371.64	546.11	1898.26	8612.5	6209.6	4142.89
2007-09-11	23952.2	2211.41	1286.33	1847.36	15877.7	15542.8	5113.97	3494.57	17129.4	1025.79	9003.12	13308.4	13704.3	53921	2597.47	2018.81	30191.1	9597.61	1471.49	2268.99	521.53	4499.52	4250.7	5478.94	6280.7	7457.9	13965.5	38854	379.36	552.86	1911.97	8717.2	6248.6	4160.16
2007-09-12	24310.1	2209.93	1285.94	1813.52	15797.6	15505.4	5172.63	3506.09	17398.4	1025.79	9018.12	13291.6	13756.7	53883	2592.07	2008.74	30076.3	9598.73	1471.56	2297.78	523.38	4472.77	4255.67	5508.01	6306.2	7472.99	13980.4	39004	381.56	552.6	1899.95	8784	6236	4143.02
2007-09-13	24537	2222.75	1284.02	1848.02	15821.2	15614.4	5273.59	3504.4	17959.5	1025.79	8927.42	13424.9	13843.2	54908	2601.06	2040.25	30302.2	9678.12	1483.95	2322.23	530.96	4512.38	4284.12	5565.97	6363.9	7535.97	14077.8	39370	385.78	562.22	1932.68	8878	6244.6	4142.43
2007-09-14	24898.1	2225.61	1289.5	1870.02	16127.4	15603.8	5312.18	3536.4	18213.7	1043.6	9031.63	13442.5	13846.4	54671	2602.18	2048.91	30096	9673.65	1484.25	2297.51	528.36	4474.39	4259.54	5538.92	6289.3	7497.74	13861	39058	380.88	558.96	1943.25	8772.6	6315.7	4162.67
2007-09-17	24599.3	2223.22	1278.34	1871.68	16127.4	15504.4	5421.39	3476.31	18494.4	1035.22	8899.91	13403.4	13809.9	54341	2581.66	2031.25	29794.5	9607.75	1476.65	2289.28	522.99	4400.55	4209.45	5439.37	6182.8	7479.85	13696.9	38684	374.97	555.2	1915.8	8685.8	6283.7	4168.72
2007-09-18	24576.8	2239.86	1277.33	1838.61	15801.8	15669.1	5425.21	3477.75	18316.4	1042.99	8899.91	13739.4	14005.4	56666	2651.66	2090.26	30603.4	9909.03	1519.78	2334.79	531	4457.05	4278.93	5549.35	6283.3	7575.21	14042	39381	379.94	556.02	1938.52	8775.9	6208	4123.52
2007-09-19	25554.6	2313.34	1297.16	1902.65	16381.5	16322.8	5395.27	3594.36	18073.3	1063.97	8926.38	13815.6	13939.8	57264	2666.48	2116.49	30512.6	9970.9	1529.03	2324.22	543.54	4622	4384.7	5730.82	6460	7750.84	14494.8	40294	392.26	572.65	2015.36	9006.8	6362	4177.65
2007-09-20	25701.1	2304.63	1308.67	1908.97	16413.8	16348	5470.06	3552.46	18221.7	1059.14	8983.03	13766.7	13838.4	56906	2654.29	2100.46	30485.8	9936.47	1518.75	2361.23	542.45	4592.54	4354.65	5688.76	6429	7735.09	14427.1	39980	387.61	570.92	2015.19	8896.7	6400.9	4206.88
2007-09-21	25843.8	2335.49	1305.94	1919.26	16312.6	16564.2	5454.67	3542.22	18228.6	1063.97	9105.28	13820.2	13940.1	57799	2671.22	2121.71	30583.1	9981.83	1525.75	2382.02	544.65	4582.45	4357.19	5700.65	6456.7	7794.43	14450.6	39970	389.29	575.7	2026.29	8897.3	6371.2	4231.16
2007-09-24	26551.9	2353.63	1317.24	1919.26	16312.6	16845.8	5485.01	3639.02	18418.5	1086.86	9105.28	13759.1	13958.3	58719	2667.95	2145.23	30543.5	9946.42	1517.73	2371	541.63	4595.59	4309.94	5692.49	6465.9	7787.92	14494.7	40019	385.49	576.85	2042.2	8906.1	6461.1	4232.67
2007-09-25	26430.3	2330.36	1316.43	1919.26	16401.7	16899.5	5425.88	3624.82	18346.5	1095.37	9105.28	13778.6	13997.6	58858	2683.45	2145.84	30294.8	9933.82	1517.21	2370.13	534.99	4537.05	4241.74	5641.59	6396.9	7769.44	14311.9	39731	380.99	569.17	2008.97	8829.2	6490.9	4241.67
2007-09-26	26430.3	2361.01	1320.89	1919.26	16435.7	16921.4	5338.52	3650.09	17992.3	1095.37	9257.47	13878.1	14035	59715	2699.03	2177.24	30303.2	9980.12	1525.42	2398.29	539.37	4532.23	4286.92	5690.77	6433	7804.15	14513.7	40071	384.51	570.83	2049.45	8859.7	6491.4	4275.97
2007-09-27	27065.2	2378.83	1335.66	1945.28	16832.2	17150.6	5409.4	3714.77	18281.1	1095.37	9413.65	13912.9	14129.7	61052	2709.59	2192.45	30528	10057	1531.38	2411.4	542.24	4545.89	4326.36	5733.37	6486.4	7853.79	14581.6	40059	390.05	572.84	2064.16	8886	6548	4275.81
2007-09-28	27142.5	2359.21	1336.3	1946.48	16785.7	17291.1	5552.3	3706.23	18864.5	1095.37	9411.95	13895.6	14098.9	60465	2701.5	2187.97	30296.2	10039.3	1526.75	2410.19	540.98	4527.3	4325.29	5715.69	6466.8	7861.51	14576.5	39889	391.79	575.15	2071.8	8933.5	6580.9	4268.9
2007-10-01	27142.5	2399.46	1347.05	1962.67	16846	17328.6	5552.3	3755.22	18864.5	1116.6	9488.5	14087.5	14200.6	62340	2740.99	2231.43	30855.7	10184.5	1547.04	2410.47	545.57	4563.42	4338.9	5773.26	6506.2	7922.42	14603	40417	393.97	576.21	2047.09	9022.5	6579.8	4281.19
2007-10-02	28199.8	2464.94	1368.72	2014.09	17046.8	17328.6	5552.3	3793.83	18864.5	1127.66	9623.25	14047.3	14152.7	62017	2747.11	2260.45	31451.8	10175.8	1546.63	2401.17	542.93	4637.91	4363.82	5799.27	6500.4	7946.79	14790	40441	395.99	571.27	2108.57	9074	6667.6	4332.29
2007-10-03	27479.9	2451.59	1366.96	2014.09	17199.9	17847	5552.3	3754.62	18864.5	1127.66	9700.07	13968	14020.9	60099	2729.43	2254.39	31178.8	10101	1539.59	2383.4	540.53	4687.09	4379.7	5806.18	6535.2	7955.3	14783.8	40423	398.09	562.27	2092.98	9088.7	6665.4	4327.87
2007-10-04	26974	2473.16	1369.84	2003.6	17092.5	17777.1	5552.3	3783.81	18864.5	1127.66	9627.39	13974.3	14125.1	60407	2733.57	2254.32	31078.3	10142.9	1542.84	2396.76	541.75	4753.29	4434.91	5804.39	6547.9	7944.99	14718	40577	398.42	561.32	2090.08	9053.4	6579.9	4299.98
2007-10-05	27831.5	2500.58	1372.39	1996.03	17065	17773.4	5552.3	3822.62	18864.5	1127.66	9617.26	14066	14233.3	62319	2780.32	2277.75	31540.9	10247.9	1557.59	2415.64	546.6	4843.89	4460.29	5843.24	6595.8	8002.18	14892.1	40800	402.79	564.22	2115.43	9075.3	6617.3	4284.05
2007-10-08	27770.3	2523.7	1364.14	2012.82	17065	17491.4	5692.76	3820.31	19232.3	1145.48	9717.17	14043.7	14233.3	62661	2787.37	2286.71	31825.5	10186.4	1552.58	2400.52	545.79	4785.48	4454.17	5829.4	6540.9	7974.37	14809	40681	401.58	562.81	2130.2	9097	6667.2	4295.24
2007-10-09	28228	2546.61	1369.39	2014.13	17159.9	18280.2	5715.89	3865.75	19318.2	1155.53	9639.83	14164.5	14262.2	63549	2803.91	2291.84	31801.7	10280.3	1565.15	2416.87	550.72	4786.03	4499.07	5861.93	6615.4	7980.44	14862.7	41074	404.1	563.93	2141.79	9137.8	6687.7	4280.24
2007-10-10	28569.3	2591.48	1376.93	2041.12	17177.9	18658.2	5771.46	3814.45	19264	1153.51	9639.83	14078.7	14276.2	63197	2811.61	2277.4	32129.4	10264.5	1562.47	2425.86	554.57	4795.89	4510.6	5838.49	6633	7986.57	14863.8	40913	405.15	567.85	2143.69	9182.3	6744.6	4279.79
2007-10-11	29133	2638.21	1383.61	2058.85	17459	18814.1	5913.23	3875.77	19344.2	1163.32	9697.67	14015.1	14229.4	62456	2772.2	2246.85	31981	10245.2	1554.41	2429.17	558.01	4832.62	4534.91	5862.83	6724.5	8033.69	15100	41024	407.81	581.53	2173.11	9218.3	6779.6	4296.61
2007-10-12	28838.4	2638.21	1375.25	2026.44	17331.2	18419	5903.26	3857.25	19135.2	1154.59	9496.47	14093.1	14295.9	62456	2805.68	2262.11	32473.5	10301.5	1561.8	2446.83	559.14	4858.11	4532.06	5843.95	6730.7	8041.26	15261.3	41106	405.53	584.25	2163.11	9197.5	6760.1	4305.62
2007-10-15	29540.8	2638.21	1375.25	2035.39	17358.2	19058.7	6030.09	3862.02	19088.7	1142.57	9518.45	13984.8	14231.3	62969	2780.05	2262.11	32335.9	10216.3	1548.71	2440.48	553.07	4811.85	4501.98	5807.44	6644.5	7969.47	15187.5	40547	402.91	588.85	2176.9	9179.5	6751.6	4325.09
2007-10-16	28954.5	2638.21	1372.38	2005.76	17137.9	19051.9	6092.06	3810.72	19358.4	1149.37	9592.47	13912.9	14153	61718	2763.91	2235.11	32230.8	10125.4	1538.53	2433.28	550.3	4781.64	4476.56	5774.36	6614.3	7962.64	15279.7	40414	390.47	583.56	2159.84	9062.7	6711.3	4312.17
2007-10-17	29298.7	2641.59	1374.39	1983.94	16955.3	18715.8	6036.28	3839.73	19288.3	1157.56	9562.16	13892.5	14219.5	63194	2792.67	2240.21	32721.8	10165.3	1541.24	2455.33	554.55	4844.36	4506.4	5818.8	6677.7	7985.41	15430.5	40259	391.95	583.49	2158.09	9071.8	6696.1	4321.84
2007-10-18	29465	2616.74	1376.32	2005.09	17106.1	17998.4	5825.28	3809.69	18681.3	1151.33	9637.07	13889	14332	63261	2799.31	2270.41	32836.1	10174.6	1540.08	2476.59	551.53	4789.08	4457.78	5767.24	6609.4	7921.4	15507.1	39903	385.93	574.65	2136.53	9027.5	6781	4313.15
2007-10-19	29465	2563.75	1370.17	1970.1	16814.4	17560	5818.05	3747.98	18834.8	1157.56	9611.72	13522	14001.7	60894	2725.16	2236.87	31823.4	9920.27	1500.63	2440.28	551.05	4796.48	4416.42	5740.48	6527.9	7884.12	15529.7	39888	380.05	575.58	2142.42	8937.2	6723.3	4316.31
2007-10-22	28373.6	2453.21	1350.81	1903.81	16438.5	17614	5667.33	3642.64	18379.4	1142.59	9360.63	13567	13987.5	61215	2753.93	2234.66	31969.5	9930.78	1506.33	2431.56	541.43	4708.02	4373.57	5661.27	6459.3	7794.94	15327.8	39242	371.26	562.99	2098.57	8845.4	6592.1	4316.31
2007-10-23	29376.9	2553.8	1357.33	1947.98	16450.6	18492.8	5773.39	3695.3	18611.2	1157.67	9502.39	13676.2	14087.5	62697	2799.26	2251.93	32229.4	10041	1519.59	2453.4	546.37	4774.67	4404.4	5705.05	6514	7842.79	15429.6	39423	380.44	574.63	2127	8903.2	6677.5	4274.69
2007-10-24	29333.5	2524.98	1359.83	1933.36	16358.4	18512.9	5843.11	3649.12	18761.9	1143.83	9442.62	13675.2	14003.9	62625	2774.76	2256.61	32048.2	10009.3	1515.88	2440.92	543.34	4742.26	4336.44	5674.67	6482	7828.96	15231.3	39280	376.16	574.33	2123.36	8851	6652.1	4291.05
2007-10-25	29854.5	2596.66	1378.27	1976.75	16284.2	18770.9	5562.39	3707.14	18175.3	1153.77	9568.26	13671.9	14124.9	62341	2750.86	2282.57	31886.1	10029.5	1514.4	2443.88	545.94	4786.05	4393.69	5760.3	6576.3	7932.44	15386	39775	380.86	583.49	2151.1	8917.5	6644.8	4267.14
2007-10-26	30405.2	2624.43	1398.35	2028.06	16505.6	19243.2	5589.63	3771.55	18506.5	1153.77	9631.51	13806.7	14296.4	64276	2804.19	2327.15	32136.8	10189.1	1535.28	2486.02	547.16	4786.05	4399.21	5794.87	6661.3	7949.17	15603.9	40020	380.64	588.49	2194.12	8962.9	6716.4	4226.71
2007-10-29	31586.9	2667.53	1411.62	2062.92	16698.1	19977.7	5748	3819.78	18833.7	1188.69	9809.88	13870.3	14427.4	65044	2817.44	2337.11	32100.8	10256.2	1540.98	2514.8	550.85	4867.78	4409.48	5836.19	6706	8009.67	15738.1	40165	382.02	597.22	2226.02	9007.3	6808.2	4215.88
2007-10-30	31638.2	2662.92	1412.79	2052.37	16651	19783.5	5897.19	3798.45	19034.6	1183.37	9757.93	13792.5	14312.1	64383	2816.71	2339.09	31783.6	10165	1531.02	2488.78	545.25	4835.02	4384	5803.93	6659	7977.94	15782.5	40163	379.74	589.12	2206.34	8939.2	6772.5	4219.77
2007-10-31	31352.6	2643.49	1413.65	2064.85	16737.6	19838	5954.77	3805.7	19531.2	1189.04	9711.37	13930	14625	65318	2859.12	2351.44	31458.7	10311.6	1549.38	2530.38	547.85	4871.71	4441.82	5847.95	6721.6	8019.22	15890.5	40512	384.15	594.99	2223.06	9019.6	6779.1	4209.07
2007-11-01	31492.9	2704.66	1409.16	2063.14	16870.4	19724.3	5914.29	3803.56	19144.6	1176.1	9598.23	13567.9	14372.5	64050	2794.83	2321.57	30806.3	10022.1	1508.44	2485.23	540.92	4871.71	4361.29	5730.92	6586.1	7880.85	15759.6	39712	379.89	588.66	2220.16	8891.5	6853.6	4207.88
2007-11-02	30468.3	2710.62	1397.48	2019.34	16517.5	19976.2	5777.81	3715.32	18564.3	1189.04	9273.09	13595.1	14363.9	64050	2810.38	2336.7	30806.3	10052.3	1509.65	2504.78	537.25	4763.76	4309.82	5720.42	6530.6	7849.49	15823.7	39706	375.28	586.88	2228.15	8770.4	6726.7	4154.13
2007-11-05	28942.3	2652.48	1384.73	2015.76	16268.9	19590.8	5634.45	3670.18	18116.9	1173.45	9308.6	13543.4	14273.4	62960	2795.18	2297.81	30157.7	9958.82	1502.17	2494.29	534.02	4691.58	4284.21	5684.62	6461.4	7807.55	15825.9	39455	375.4	584.13	2228.15	8707.8	6620.1	4141.2
2007-11-06	29438.1	2681.9	1389.11	2054.24	16249.6	19400.7	5536.57	3683.1	18120.6	1184.2	9292.8	13660.9	14370.6	64503	2825.18	2297.81	30430.5	10102.4	1520.27	2538.91	533.7	4703.1	4302.15	5709.42	6474.9	7827.19	15895.4	39426	377.37	597.31	2268.92	8770.3	6659.1	4135.43
2007-11-07	29708.9	2713.98	1413.85	2043.19	16096.7	19289.8	5601.78	3673.01	18233	1176.94	9300.22	13300	14118.2	63501	2748.76	2298.82	29582.2	9830.15	1475.62	2499.99	530.27	4644.4	4246.85	5683.22	6385.1	7799.62	15841.9	39281	372.87	599.78	2280.95	8703.2	6728.1	4205.58
2007-11-08	28760.2	2678.22	1413.85	1979.56	15771.6	19058.9	5330.02	3673.01	17465.5	1168.11	8937.58	13266.3	14128.6	63562	2696	2263.02	29289.7	9877.47	1474.77	2485.41	523.169	4659.51	4107.8	5631.63	6381.9	7819.47	15945.7	38546	371.5	598.73	2288.15	8605.2	6568.5	4185.42
2007-11-09	28783.4	2707.67	1402.25	1990.47	15583.4	18907.6	5315.54	3599.67	17160.1	1176.94	8970.92	13042.7	13869.8	64321	2627.94	2314.23	29158.9	9733.34	1453.7	2436.84	510.65	4587.42	4048.61	5524.18	6304.9	7812.4	15731.2	37845	362.27	591.27	2262.11	8417.2	6607.4	4134.77
2007-11-12	27665.7	2671.9	1382.35	1923.42	15197.1	18737.3	5187.74	3511.12	17065.8	1142.34	8670.61	12987.5	13605	61527	2584.13	2273.26	28185.9	9569.97	1439.18	2378.27	508.32	4569.88	4055.34	5535.56	6337.9	7806.84	15774.7	38187	364.28	577.75	2243.04	8442	6523.3	4089.13
2007-11-13	27803.3	2654.21	1383.43	1932.89	15126.6	19035.5	5158.12	3475.47	16747.9	1152.25	8727.21	13307.1	13705.1	62927	2673.65	2305.23	29484.8	9860.98	1481.05	2413.27	507.89	4534.95	4093.02	5538.91	6362.4	7777.56	15814.8	38410	362.39	570.32	2222.84	8500.6	6570.9	4107.15
2007-11-14	29166	2691.87	1384.58	1972.58	15499.6	19929.1	5412.69	3524.91	17355.5	1153.78	8942.93	13231	13774.5	64631	2644.32	2309.43	29655.7	9809.15	1470.58	2408.37	512.32	4500.35	4142.65	5613.6	6432.1	7783.11	15808.9	38586	363.04	576.38	2244.11	8631	6650	4140.65
2007-11-15	28751.2	2705.82	1390	1947.74	15396.3	19784.9	5365.27	3477.59	17096.9	1144.32	8905.41	13110	13524.4	64631	2618.51	2268.07	29170.9	9652.52	1451.15	2380.5	506.78	4433.54	4106.91	5561.13	6359.6	7667.03	15725.8	38448	356.82	566.71	2217.95	8593.7	6594.4	4113.05
2007-11-16	27614.4	2668.7	1386.64	1926.2	15154.6	19698.4	5316.27	3440.96	16728.2	1154.26	8764.82	13176.8	13530.4	64609	2637.24	2281.16	29631.6	9701.38	1458.74	2405.41	500.08	4411.14	4060.71	5523.63	6291.2	7612.26	15769	38535	354.81	559.41	2189.37	8478.8	6526.1	4114.18
2007-11-19	27460.2	2646.81	1379.91	1893.47	15042.6	19633.4	5269.82	3411.72	16660.7	1142.7	8680.71	12958.4	13348.2	62336	2593.38	2243.53	29631.6	9497.33	1433.27	2342.19	491.09	4267.32	3991.74	5432.57	6120.8	7511.97	15539.3	37612	343.13	559.41	2166	8270.9	6601.3	4114.67
2007-11-20	27771.2	2624.86	1371.7	1872.24	15211.5	19280.8	5293.7	3438.27	16987.5	1140.93	8680.86	13010.1	13459.8	62336	2596.81	2245.89	29050.5	9575.29	1439.7	2366.86	493.84	4322.28	4009.87	5506.68	6226.5	7630.31	15700	37938	346.88	559.41	2180.22	8339	6490.2	4067.3
2007-11-21	26618.2	2563.62	1359.85	1806.99	14837.7	18602.6	5214.23	3347.2	16748.2	1111.85	8484.11	12799	13280.6	60582	2562.15	2216.15	28446.5	9405.22	1416.77	2337.97	483.53	4171.9	3882.37	5381.3	6070.9	7518.42	15364.5	37358	339.88	559.41	2151.88	8125.4	6450.2	4071.01
2007-11-22	26004.9	2569.51	1344.16	1799.02	14888.8	18526.3	4984.16	3312.88	15949.4	1108.08	8499.37	12799	13381	60653	2562.15	2210.54	28520.2	9405.22	1416.77	2337.97	484.93	4178.83	3923.22	5416.1	6155.3	7562.1	15317.1	37365	338.99	545.02	2135.93	8227.1	6395.1	4054.22
2007-11-23	26541.1	2584.35	1353.55	1772.88	14888.8	18852.9	5032.13	3325.89	16217.5	1109.85	8342.2	12980.9	13467.2	60971	2596.6	2212.04	28710.9	9582.98	1440.7	2384.22	492.47	4241.79	4011.95	5521.17	6262.1	7608.96	15392.2	38012	341.32	554.04	2151.89	8371.8	6392.4	4071
2007-11-26	27626.6	2648.04	1364.37	1855.33	15135.2	19247.5	4958.85	3418.58	16057.2	1120.53	8528.33	12743.4	13321	59069	2540.99	2190.82	27883	9389.5	1407.22	2331.43	491.82	4276.98	4009.52	5458.39	6180.5	7567.36	15330.2	37736	343.82	562	2177.07	8361.2	6533.2	4077.11
2007-11-27	27210.2	2627.95	1364.99	1859.79	15222.9	19127.7	4861.11	3372.64	15681	1109.37	8375.76	12958.4	13369.1	59432	2580.8	2169.78	28124.7	9521.76	1428.23	2296.44	492.24	4208.49	4009.99	5434.17	6140.7	7531.35	15315.6	37712	342.46	548.94	2155.38	8431.1	6493.6	4104.06
2007-11-28	27371.2	2671.9	1366.58	1834.69	15153.8	18938.9	4803.39	3369.72	15359.2	1127.59	8276.26	13289.5	13632.1	61715	2662.91	2230.83	29276.4	9791.05	1469.02	2353.94	500.21	4373.53	4090.98	5561.21	6306.2	7723.66	15566.5	38487	353.48	564.92	2168.11	8650.8	6432.8	4071.03
2007-11-29	28482.5	2699.82	1374.32	1877.56	15513.7	19003.3	5003.33	3478.22	15919.3	1130.95	8447.03	13311.7	13663.9	62156	2668.13	2236.39	29399.9	9773.57	1469.72	2333.53	501.91	4403.98	4102.53	5598.11	6349.1	7765.19	15656.6	38599	356.07	566.72	2180.5	8734.5	6507.2	4066.54
2007-11-30	28643.6	2688.33	1396.98	1906	15680.7	19363.2	4871.78	3521.27	15637.7	1129.48	8586.4	13371.7	13689.1	63006	2660.96	2207.16	29770.5	9856.85	1481.14	2359.85	507.58	4471.83	4162.5	5670.57	6432.5	7870.52	15759.9	38975	359.19	572.79	2220.11	8828.4	6593.6	4062.89
2007-12-03	28658.4	2726.93	1419.34	1902.43	15629	19603.4	4868.61	3521.56	15833	1145.88	8583.84	13314.6	13657.2	63200	2637.13	2192.07	29968.5	9811.86	1472.42	2351.55	502.88	4464.93	4149.15	5629.46	6386.6	7837.26	15735	38820	357.97	567.65	2200.75	8706.2	6597.2	4060.01
2007-12-04	28879.6	2752.94	1415.81	1917.83	15480.2	19529.5	4915.89	3527.87	16065.2	1135.32	8651.28	13248.7	13579.6	63482	2619.83	2186.94	29998.8	9748.38	1462.79	2337.01	497.52	4369.65	4085.97	5547.21	6315.2	7808.94	15708.2	38489	351.37	559.36	2204.42	8645	6588.8	4053.86
2007-12-05	29345.5	2768.06	1427.77	1938.2	15608.9	19738.1	5042.65	3560.05	16569.8	1153.25	8676.95	13445	13734.5	64928	2666.36	2211.85	30761.6	9887.6	1485.01	2355.65	507.8	4448.99	4143.92	5659.07	6493.8	7944.77	15802.2	39125	357.81	569.77	2262.28	8758.2	6568.4	4034.55
2007-12-06	29558.9	2795.4	1440.39	1953.17	15874.1	19795.9	5035.07	3552.55	16539.1	1163.81	8694.41	13619.9	13849.8	65791	2709.03	2241.94	31257.3	10030.1	1507.34	2407.4	510.43	4479.02	4153.77	5673.76	6485.6	7940.58	15695.9	39170	359.53	575.88	2259.14	8741.7	6660.5	4043.5
2007-12-07	28842.5	2778.95	1434.04	1934.32	15956.4	19966	5091.76	3557.95	16750.4	1154.02	8722.38	13625.6	13863	65639	2706.16	2238.86	31268.4	10023.6	1504.66	2402.01	513.59	4515.39	4170.04	5718.75	6554.9	7994.07	15819.6	39388	364.22	561.19	2285.85	8799.7	6714	4092.93
2007-12-10	28501.1	2790.26	1425.13	1906.42	15924.4	19930.7	5161.92	3553.08	17096.5	1176.69	8598.03	13727	13940.4	65446	2718.95	2244.97	31182.8	10104.4	1515.96	2426.84	516.84	4517.84	4181.13	5750.92	6565.4	8033.36	15832.7	39571	366.97	562.2	2330.45	8885.3	6686.1	4057.49
2007-12-11	29226.8	2810.96	1434.16	1925.07	16044.7	20290.9	5175.08	3589.03	17036.9	1174.92	8638.33	13432.8	13723.7	64512	2652.35	2230.43	30327.4	9838.26	1477.65	2372.37	515.49	4499.68	4157.78	5724.76	6536.9	8009.42	15890.5	39425	367.55	563.81	2342.64	8855.9	6738.1	4026.95
2007-12-12	28521.1	2795.84	1423.72	1927.45	15932.3	20375.9	5095.54	3549.25	16831.6	1182.73	8490.84	13473.9	13809.4	64742	2671.14	2226.12	30327.4	9921.64	1486.59	2392.19	516.2	4497.75	4142.49	5743.32	6559.8	8076.12	15860	39464	367.07	566.5	2359.85	8852.3	6675.4	3999.55
2007-12-13	27744.5	2755.73	1410.56	1915.9	15536.5	20104.4	4958.04	3479.31	16035.2	1172.23	8187.95	13518	13747.2	62861	2668.49	2196.48	30088	9864.28	1488.41	2370.41	507.9	4392.95	4065.16	5590.91	6364.2	7928.31	15499.2	38818	357.79	558.24	2317.28	8658.4	6661.1	4001.39
2007-12-14	27563.6	2740.06	1403.41	1895.05	15514.5	20030.8	5007.91	3466.38	16483.5	1172.23	8118.08	13339.9	13674.2	62445	2635.74	2184.49	29994.9	9698.37	1467.95	2351.84	511.28	4448.28	4109.46	5605.36	6397	7948.36	15575.7	38870	357.3	556.99	2269.53	8675.9	6556.1	4008.66
2007-12-17	26596.6	2664.92	1391.61	1839.82	15249.8	19261.3	4876.76	3353.56	16119	1120.03	7830.85	13167.2	13387.1	59828	2574.46	2127.21	28968.2	9528.67	1445.9	2342.25	503.46	4364.59	4039.16	5514.88	6277.8	7825.44	15318.5	38246	347.15	546.27	2251.07	8544.6	6331.8	3962.62
2007-12-18	26732.9	2646.23	1385.45	1861.47	15207.9	19079.6	4836.17	3369.31	16074.1	1127.23	7807.39	13232.5	13358.1	61096	2596.03	2125.67	29255	9602.55	1454.98	2341.18	502.72	4430.75	4057.55	5509.37	6279.3	7850.74	15282.1	38248	346.26	547.77	2269.09	8467.1	6292.6	3926.12
2007-12-19	27029.2	2657.98	1387.21	1861.47	15030.5	19092	4941.78	3357.34	16387	1130.16	8014.31	13207.3	13389.8	61722	2601.01	2130.12	29074.1	9586.07	1453	2334.53	502.63	4413.51	4038.92	5497.42	6284.5	7837.32	15177.1	37992	345.99	545.58	2264.95	8395	6280.8	3939.73
2007-12-20	27017.1	2657.98	1387.21	1844.37	15031.6	19162.6	5043.54	3357.34	16625.4	1134.98	7857.08	13245.6	13407	61716	2640.86	2140.31	29148.5	9622.27	1460.12	2357.37	506.79	4423.9	4057.92	5511.45	6345.6	7869.19	15140.2	37866	344.55	544.58	2283.28	8402.8	6244.8	3947.56
2007-12-21	27626.9	2657.98	1403.56	1878.32	15257	19162.6	5101.78	3398.1	16808.7	1129.24	7941.44	13450.6	13596.1	63098	2691.99	2145.25	29638.4	9787.93	1484.46	2404.38	513.71	4477.11	4114.59	5602.77	6434.1	8002.67	15289.3	38182	350.66	556.2	2296.09	8468.4	6309.4	3993.51
2007-12-24	28128.8	2657.98	1423.24	1919.47	15257	19854.1	5234.26	3434.53	17153.9	1152	8135.48	13550	13694.8	63098	2713.5	2145.25	29853.8	9873.48	1496.45	2429.81	516.19	4477.11	4136.91	5614.28	6479.3	8002.67	15289.3	38182	350.66	556.2	2303.28	8468.4	6388	4058.71
2007-12-25	28128.8	2657.98	1423.24	1919.47	15552.6	19854.1	5201.18	3434.53	17199	1162.48	8167.07	13550	13694.8	63098	2713.5	2145.25	29853.8	9873.48	1496.45	2429.81	516.19	4477.11	4136.91	5614.28	6479.3	8002.67	15289.3	38182	350.66	556.2	2293.03	8468.4	6388	4058.71
2007-12-26	28128.8	2714.55	1424.02	1906.72	15653.5	20192.5	5233.35	3473.21	17427.8	1159.34	8156.39	13551.7	13694.8	64288	2724.41	2179.9	30002.5	9894.15	1497.66	2436.64	516.19	4477.11	4136.91	5614.28	6479.3	8002.67	15289.3	38182	350.66	556.2	2283.08	8468.4	6388	4058.71
2007-12-27	27842.9	2739.7	1437.82	1908.62	15564.7	20216.7	5308.89	3477.2	17797.2	1158.49	8313.72	13359.6	13675.6	63774	2676.79	2168.23	29642.1	9779.3	1476.27	2425.59	516.429	4522.64	4138.37	5627.48	6497.8	8038.6	15256.2	38343	349.33	565.88	2291.46	8518.2	6426.4	4068.63
2007-12-28	27370.6	2745.83	1447.04	1897.13	15307.8	20207	5261.56	3445.82	17700.6	1159.64	8396.95	13365.9	13821.3	63886	2674.46	2151.73	29700.2	9803.89	1478.49	2428.22	515.69	4512.98	4147.19	5627.25	6476.9	8067.32	15182.3	38554	351.84	569.97	2290.51	8484.5	6423.7	4036
2007-12-31	27812.7	2745.83	1445.03	1897.13	15307.8	20287	5261.56	3482.3	17700.6	1150.38	8506.28	13264.8	13833.1	63886	2652.28	2151.73	29536.8	9740.32	1468.36	2409.62	515.77	4512.98	4127.47	5614.08	6456.9	8067.32	15182.3	38554	351.84	569.97	2290.51	8484.5	6421	4041.38
2008-01-01	27812.7	2745.83	1445.03	1897.13	15307.8	20300.7	5261.56	3482.3	17700.6	1150.38	8506.28	13264.8	13833.1	63886	2652.28	2151.73	29536.8	9740.32	1468.36	2409.62	515.77	4512.98	4127.47	5614.08	6456.9	8067.32	15182.3	38554	351.84	569.97	2290.51	8484.5	6419.6	4041.38
2008-01-02	27560.5	2731.51	1435.68	1853.45	15307.8	20465.3	5272.81	3461.22	17856.2	1158.34	8323.05	13044	13926.8	62815	2609.63	2151.74	28699.1	9647.5	1447.16	2405.05	509.77	4509.24	4114.46	5550.36	6416.7	7949.11	15002.5	38035	345.69	570.14	2290.51	8484.5	6434.1	4041.38
2008-01-03	26887.3	2715.06	1435.38	1852.73	15307.8	20345.2	5319.86	3397.06	17911.3	1145.41	8184.2	13056.7	13978.2	62892	2602.68	2150.57	28860.8	9656	1447.16	2419.04	508.67	4466.47	4117.49	5546.08	6479.4	7908.41	14856.5	38063	342.95	565.67	2290.51	8318.8	6372.6	4033.93
2008-01-04	27519.7	2765.19	1466.67	1863.9	14691.4	20686.9	5361.57	3437.79	18122.4	1159.24	8221.1	12800.2	13778.6	61037	2504.65	2128.94	28317.9	9432.03	1411.63	2382.46	500.6	4358.85	4094.38	5446.79	6348.5	7808.69	14602.3	37450	332.06	553.81	2290.51	8130	6385.4	4010.82
2008-01-07	27179.5	2776.41	1470.77	1831.14	14500.5	20812.7	5393.34	3353.06	18377	1117.8	7883.37	12827.5	13618.9	60772	2499.46	2103.72	28152.6	9462.24	1416.18	2382.07	500.63	4332.35	4097.28	5452.83	6335.7	7817.17	14667	37601	329.88	545.02	2290.51	8110.6	6240.4	3953.58
2008-01-08	27112.9	2785.62	1489.74	1826.23	14528.7	20873.3	5386.53	3338.27	18268.1	1123.47	7962.91	12589.1	13541.8	62081	2440.51	2140.95	28267.8	9326.08	1390.19	2365.94	497.23	4373.86	4097.17	5495.67	6356.5	7849.99	14670.5	37571	333.3	555.49	2290.51	8316.4	6205.7	3928.4
2008-01-09	27615.8	2830.26	1491.66	1844.47	14599.2	20869.8	5435.81	3344.53	18597.6	1115.2	8085.06	12735.3	13579.9	62674	2474.55	2089.58	28401.6	9424.69	1409.13	2383.8	491.74	4282.36	4065.32	5435.42	6272.7	7782.71	14603.5	37321	326.09	540.88	2296.56	8339.8	6159.5	3912.17
2008-01-10	27230.9	2830.26	1491.66	1824.78	14388.1	20582.1	5456.54	3344.53	18939.3	1092.35	8057.27	12853.1	13642.6	63515	2488.52	2084.55	29069.6	9490.76	1420.33	2416.45	484.1	4162.18	4051.53	5400.43	6222.7	7713.09	14524	37293	321.42	523.76	2306.87	8290.8	6147.3	3899.88
2008-01-11	26867	2830.26	1516.22	1782.27	14110.8	20827.5	5484.68	3344.53	19016.6	1092.35	8029.31	12606.3	13632.6	61942	2439.94	2082.93	28723.8	9347.47	1401.02	2362.2	481.83	4118.58	4022.93	5371.41	6202	7717.95	14458	37364	320.21	512.13	2313.9	8159.7	6054.4	3872.18
2008-01-14	26468.1	2810.37	1507.04	1765.88	14110.8	20728	5497.9	3344.53	19141.1	1105.44	8173.41	12778.1	13698.3	62188	2478.3	2132.38	28607.5	9439.34	1416.25	2368.66	484.72	4142.95	4013.34	5403.51	6215.7	7732.02	14431.9	37547	326.05	514.35	2339.79	8193.4	6040.9	3824.21
2008-01-15	25837.8	2730.03	1505.71	1746.95	13972.6	20251.1	5443.79	3344.53	19034	1086	8428.84	12501.1	13316.8	59907	2417.59	2069.31	27961.8	9172.17	1380.95	2313.5	470.54	4012.4	3900.33	5250.82	6025.6	7566.38	13945.2	36682	314.88	498.2	2330.87	7973.9	6019.8	3810.5
2008-01-16	24450.8	2592.31	1453.66	1704.97	13504.5	19868.1	5290.61	3344.53	18352	1072.28	8179.54	12466.2	13074.9	58777	2394.59	2065.77	27343.6	9073.43	1373.2	2289.28	462.61	3907.84	3801.37	5225.39	5942.9	7471.57	13817.1	36632	312.41	481.98	2225.46	7847.5	5870.8	3752.39
2008-01-17	25115	2649.28	1460.71	1723.55	13783.5	19700.8	5151.63	3344.53	17910.4	1067.38	8101.63	12159.2	12795.6	57037	2346.9	2011.21	26698.7	8818.95	1333.25	2246.56	460.25	3887.17	3767.54	5157.09	5902.4	7413.53	13775.6	36238	312.99	480.48	2174.78	7788.1	5857	3729.96
2008-01-18	25201.9	2611.13	1439.49	1734.72	13861.3	19013.7	5180.51	3344.53	18131.4	1072.28	8184.65	12099.3	12737.1	57506	2340.02	2002.46	26713.8	8794.86	1325.19	2239.09	450.08	3898.28	3695.13	5092.4	5901.7	7314.17	13655.4	35753	310.09	473.62	2159.1	7692	5799.4	3664.35
2008-01-21	23818.9	2485.88	1408.6	1683.56	13325.9	17605.3	4914.44	3344.53	17210.9	1044.56	8110.2	12099.3	12132.1	53709	2340.02	1876.87	25284.9	8794.86	1325.19	2239.09	422.45	3712.61	3492.48	4744.45	5578.2	6790.19	12625.8	33903	297.93	442.79	1999.83	7287.1	5630.9	3646.91
2008-01-22	21757.6	2294.52	1354.48	1609.02	12573	16729.9	4559.75	3344.53	15995.9	1024.75	7581.96	11971.2	12640.9	56097	2292.27	1943.56	26892.7	8661.17	1310.5	2172.38	433.27	3768.28	3548.65	4842.54	5740.1	6769.47	12839.7	34302	308.61	453.94	1967.7	7487.9	5222	3607.13
2008-01-23	24090.2	2476.28	1354.48	1628.42	12829.1	17594.1	4703.05	3344.53	16874.3	997.24	7408.4	12270.2	12657.4	54235	2316.41	1891.25	27620.3	8805.68	1338.6	2145.44	417.13	3685.22	3460	4636.76	5609.3	6439.21	12254.6	32940	299.34	445.07	1890.88	7356.1	5445.6	3615.3
2008-01-24	23539.3	2516.7	1383.35	1663	13092.8	17221.7	4717.73	3050.09	17086.6	1008.02	7517.05	12378.6	12907.3	57463	2360.92	1966.46	27905.1	8942.25	1352.07	2183.19	444.23	3888.08	3684.36	4915.29	5875.8	6821.07	13106.7	34237	310.54	460.14	1988.23	7691	5605.8	3658.61
2008-01-25	25122.4	2620.49	1405.4	1692.41	13629.2	18361.7	4761.69	3159.48	17294	998.13	7739.59	12207.2	12894.8	57463	2326.2	1982.73	27379.9	8827.5	1330.61	2195.05	438.69	3901.5	3633.64	4878.12	5869	6816.74	13141.1	34197	312.69	475.37	2033.09	7686.9	5886.3	3729.15
2008-01-28	24053.6	2582.05	1380.54	1627.19	13087.9	18152.8	4419.29	3041.06	16177.8	989.52	7485.79	12383.9	12986.9	58594	2349.91	2003.83	27758.9	8978.41	1353.96	2198.42	439.32	3781.94	3663.79	4848.3	5788.9	6818.85	13026.7	34234	308.66	463.26	1978.68	7581.7	5886.3	3710.32
2008-01-29	24291.8	2607.84	1388.5	1637.91	13478.9	18091.9	4457.94	3049.9	16205.9	1018.4	7576.42	12480.3	13046.4	59530	2358.06	2003.86	28264	9046.02	1362.3	2214.81	446.08	3877.82	3768.41	4941.45	5885.2	6892.96	13246.6	34565	311.94	475.47	2009.71	7704.4	5754.5	3704.17
2008-01-30	23653.7	2610.36	1384.08	1589.06	13345	17758.6	4417.85	3000.03	16127.7	1017.79	7543.5	12442.8	12998.2	60289	2349	2036.18	28296.8	8994.45	1355.81	2209.79	443.04	3833.56	3767.06	4873.57	5837.3	6875.35	13217.1	34274	310.3	472.96	1981.53	7671.8	5665.3	3697.01
2008-01-31	23455.7	2627.25	1393.25	1624.68	13592.5	17648.7	4383.39	2981.75	15857.7	1000.92	7521.13	12650.4	13155.1	59490	2389.86	2007.27	28793.6	9126.16	1378.55	2215.32	441.33	3841.96	3722.23	4869.79	5879.8	6851.75	13229	34230	309.17	458.8	1906.97	7670.4	5697	3670.64
2008-02-01	24123.6	2646.82	1393.25	1634.53	13497.2	18242.6	4320.77	3007.8	15776.9	1016.61	7673.99	12743.2	13318.4	61080	2413.36	2045.14	29429.9	9277.58	1395.42	2257.28	451.61	3882.47	3809.63	4978.06	6029.2	6968.67	13494.7	34615	318.45	469.96	1968.97	7816	5882.3	3708.13
2008-02-04	25032.1	2701.63	1419.66	1690.13	13859.7	18660.3	4672.17	3077.08	17031.7	1021.15	7673.99	12635.2	13258.2	61080	2382.85	2084.55	29429.9	9202.11	1380.82	2256.92	451.91	3931.29	3809.65	4973.64	6026.2	7000.49	13515.7	34767	319.47	477.29	2012.76	7751.7	5921.7	3711.73
2008-02-05	24808.7	2704.25	1432.35	1696.57	13745.5	18663.2	4599.7	3038.42	16859.6	1008.36	7673.99	12265.1	12932	61080	2309.57	2054.79	28087	8874.5	1336.64	2210.3	436.81	3835.8	3688.83	4776.86	5868	6765.25	12814.7	33675	309.56	472.04	1966.73	7517.4	5852.1	3690.01
2008-02-06	23469.5	2639.09	1415.94	1696.57	13099.2	18139.5	4599.7	2931.97	16859.6	1006.07	7673.99	12200.1	12867.2	58969	2278.75	2039.51	27929.3	8818.11	1326.45	2212.73	442.33	3876.94	3698.58	4816.43	5875.4	6847.51	13037.3	33856	311.19	471.49	1947.19	7565.5	5677.6	3690.01
2008-02-07	23469.5	2639.09	1415.94	1696.57	13207.1	17526.9	4599.7	2931.97	16859.6	993.72	7673.99	12247	12925.4	58965	2293.03	2011.07	28088.3	8859.04	1336.91	2207.34	432.15	3764.53	3652.59	4723.8	5724.1	6733.72	12889.5	33227	302.71	463.54	1887.41	7420	5668.3	3636.2
2008-02-08	23469.5	2639.09	1415.94	1696.57	13017.2	17464.9	4599.7	2931.97	16859.6	993.72	7673.99	12182.1	12989.3	59076	2304.85	1992.62	28185.3	8823.12	1331.29	2229.96	432.1	3750.61	3612.07	4709.65	5784	6767.28	12934.8	33053	302.26	458.84	1870.93	7447	5723.9	3612.41
2008-02-11	22616.1	2589.38	1407.38	1640.67	13017.2	16630.9	4599.7	2868.29	16859.6	986.45	7673.99	12240	13130.9	60643	2320.06	2001.26	28789.5	8868.28	1339.13	2246.61	427.74	3750.96	3583.25	4682.7	5707.7	6743.54	12818.8	32764	299.64	456.47	1917.61	7347.5	5603.1	3572.94
2008-02-12	22964.2	2592.07	1417.52	1643.29	13022	16608	4599.7	2926.23	16859.6	1007.98	7553.3	12373.4	13087.4	61805	2320.04	2034.13	28870	8965.35	1348.86	2245.19	443.89	3864	3694.05	4840.71	5910	6967.84	13254.7	33778	310.51	472.11	1980.84	7546.9	5669.4	3574.84
2008-02-13	23169.5	2610.78	1423.15	1631.78	13068.3	16949.1	4490.72	2949.54	16502.4	1018.86	7550.55	12552.2	13282.3	62591	2373.93	2043.43	29306.8	9073.48	1367.21	2274.24	444.18	3905.96	3713.96	4855.4	5880.1	6973.67	13266.7	34014	311.58	473.77	2004.48	7536.5	5615.3	3545.77
2008-02-14	24021.7	2675.65	1436.1	1697.45	13626.5	17766.6	4552.32	3045.59	16704.9	1022.74	7865.28	12377	13208	61819	2332.54	2041.81	29138.9	8968.41	1348.86	2263.1	442.53	3918.23	3761.88	4858.65	5879.3	6962.28	13313.2	34123	312.04	486.15	2025.14	7502	5748.2	3550.41
2008-02-15	24148.4	2688.19	1427.19	1694.77	13622.6	18115.2	4497.13	3088.68	16496.2	1019.61	7876.37	12348.2	13226.8	61272	2321.8	2039.09	28744.8	8970.76	1349.99	2244.5	434.81	3848.56	3662.78	4771.79	5787.6	6832.43	13073.9	33568	308.57	483.31	1989.25	7353	5679.8	3510.81
2008-02-18	23759.2	2684.7	1427.19	1696.24	13635.4	18048	4568.15	3088.68	16860.5	1019.61	7876.37	12348.2	13226.8	61272	2321.8	2039.09	28744.8	8970.76	1349.99	2244.5	434.81	3848.56	3662.78	4861.8	5946.6	6967.55	13312.2	33960	315.92	490.68	2026.17	7486.71	5655.9	3510.81
2008-02-19	24123.2	2711.87	1425.49	1720.52	13757.9	18075.7	4664.3	3098.06	17281.6	1025.99	8024.41	12337.2	13447.7	62297	2306.2	2062.82	28900	9023.04	1348.78	2246.99	448.77	3971.24	3766.23	4885.83	5966.9	7002.29	13269.7	34120	317.65	495.78	2046.8	7462.7	5688.6	3609.41
2008-02-20	23590.6	2689.26	1414.32	1687.91	13310.4	17617.6	4567.03	3026.83	16959.2	1015.89	7894.47	12427.3	13551.7	63747	2327.1	2074.7	29224.4	9073.96	1360.03	2264.36	446.69	3945.83	3734.17	4812.81	5893.6	6899.68	13080.4	33816	313.53	490.49	2020.92	7381.6	5577.3	3595.91
2008-02-21	23623	2734.21	1394.76	1704.36	13688.3	17734.7	4527.18	3054.81	16804.2	1027.43	8085.93	12284.3	13509.5	63792	2299.78	2083.46	29361.3	8977.73	1342.53	2258.19	453.14	3936.98	3726.72	4858.85	5932.2	6904.85	13173	33877	316.63	496.51	2065.39	7486.1	5663	3595.91
2008-02-22	23305	2741.18	1369.48	1686.45	13500.5	17349.1	4370.29	3048.64	16179.5	1015.42	8108.71	12381	13585.9	64609	2303.35	2088.36	29528.8	9064.83	1353.11	2277.9	451.63	3938.52	3662.42	4824.55	5888.5	6806.29	13017.5	33428	312.73	492.25	2079.72	7454.8	5644.5	3569.62
2008-02-25	23269.1	2751.86	1370.79	1709.13	13914.6	17650.6	4192.53	3064.95	15486.7	1039.42	8286.31	12570.2	13697.5	65001	2327.48	2120.74	29962.9	9210.08	1371.8	2306.91	459.01	3992.25	3733.96	4919.26	5999.5	6882.56	13156.6	33931	318.61	492.28	2079.72	7615.8	5699.8	3570.75
2008-02-26	23714.8	2738.87	1375.43	1709.13	13824.7	17806.2	4238.18	3077.83	15328.4	1047.15	8307.67	12684.9	13797	65183	2344.99	2151.38	30228.1	9302.8	1381.29	2347.81	464.34	4025.65	3794.86	4973.07	6087.4	6985.97	13436.6	34433	324.32	494.87	2096.32	7743.2	5745.8	3543.25
2008-02-27	24483.8	2740.14	1376.62	1720.89	14031.3	17826	4334.05	3094.45	15752.4	1043.31	8462.08	12694.3	13778.4	65495	2353.78	2166.21	30424.8	9292.89	1380.02	2354.66	462.58	3957.26	3787.53	4968.82	6076.5	6997.85	13454.3	34532	326.29	501.44	2096.44	7782.5	5842.5	3562.37
2008-02-28	24591.7	2756.31	1368.27	1736.17	13925.5	17824.5	4299.51	3074.15	15654.5	1033.86	8462.08	12582.2	13873.9	65555	2331.57	2199.12	30130.5	9221.88	1367.68	2364.29	452.91	3897.29	3762.68	4865.23	5965.7	6862.52	13272.1	34082	321.35	500.95	2081.51	7663	5746.1	3579.57
2008-02-29	24331.7	2721.94	1357.4	1711.62	13603	17578.7	4348.54	3026.45	15823.9	1042.67	8412.76	12266.4	13582.7	63489	2271.48	2162.2	28918.5	8962.46	1330.63	2326.6	446.53	3871.51	3757.12	4790.66	5884.3	6748.13	13170.4	33587	319.25	495.55	2063.94	7533.9	5674.7	3582.72
2008-03-03	23585	2652.31	1330.61	1671.73	12992.2	16677.9	4438.27	2926.55	16187.5	1002.14	8262.87	12258.9	13544.4	64490	2258.6	2136.79	29526.7	8970.39	1331.34	2322.11	441.48	3754.85	3704.38	4742.66	5818.6	6689.95	12862.5	33173	315.22	487.58	2032.29	7403.9	5510.7	3584.25
2008-03-04	23119.9	2634.75	1314.02	1676.18	12992.3	16339.9	4335.45	2919.68	15746.2	996.36	8470.11	12213.8	13476.8	63656	2260.28	2134.56	29261.1	8891.45	1326.75	2313.74	436.3	3685.58	3675.01	4675.91	5767.7	6545.04	12630.1	32648	308.38	488.76	2018.88	7276	5479.2	3584.47
2008-03-05	23114.3	2639.65	1280.23	1677.1	12972.1	16542.1	4292.65	2910.77	15601.2	1010.4	8483.95	12255	13603.3	64629	2272.81	2182.11	29277.3	8962.42	1333.7	2317.44	444.4	3772.01	3735.98	4756.42	5853.5	6683.71	12948.1	33443	314.13	492.2	2042.38	7338.8	5471.6	3619.47
2008-03-06	23342.7	2656.46	1299.69	1697.44	13215.4	16542.1	4360.99	2917.92	15696.1	1000.71	8658.64	12040.4	13360.4	62975	2220.5	2179.07	28717	8765.41	1304.34	2303.45	437.27	3747.05	3673.3	4678.05	5766.4	6591.31	12803.3	32819	310.92	488.51	2050.46	7269.9	5531.9	3603.83
2008-03-07	22501.3	2656.46	1296.33	1663.97	12782.8	15975.5	4300.52	2866.28	15560.9	1011.19	8531.38	11893.7	13281.7	61868	2212.49	2129.84	28612.8	8676.27	1293.37	2272.59	435.09	3689.13	3635.06	4618.96	5699.9	6513.99	12691.3	32179	306.58	478.91	2012.65	7174.1	5368.9	3558.26
2008-03-10	22705	2527.87	1173.22	1625.17	12532.1	15923.7	4146.3	2836.59	14863	969.79	8299.37	11740.1	13005.1	59999	2169.34	2100.6	28207.3	8534.37	1273.37	2257.82	427.96	3671.08	3595.62	4566.99	5629.1	6448.08	12655	31811	302.76	467.54	2012.65	7055	5275.7	3547.75
2008-03-11	22995.3	2523.53	1206.54	1641.48	12658.3	16123.1	4165.88	2860.85	14815.7	965.24	8381.6	12156.8	13344.5	62368	2255.76	2144.48	29466.2	8842.68	1320.65	2299.39	433.64	3729.1	3669.92	4627.69	5690.4	6524.57	13056.1	32475	307.44	477.98	2058.39	7143	5211.1	3520.46
2008-03-12	23422.8	2556.24	1232.59	1658.83	12861.1	16128	4070.12	2917.94	14348.5	978.23	8435.3	12110.2	13297.4	62177	2243.87	2134.14	29283.4	8781.23	1308.77	2306.4	439.81	3776.59	3743.92	4697.1	5776.4	6599.37	13131.3	32518	312.58	480.43	2079.67	7245	5334.1	3544.83
2008-03-13	22301.6	2440.59	1201.35	1615.62	12433.4	15357.4	3971.26	2805.55	13943.2	944.84	8210.99	12145.7	13443.5	62280	2263.61	2149.91	29703.1	8827.16	1315.48	2339.1	434.55	3738.74	3706.04	4630.19	5692.4	6500.56	13073.2	31977	308.9	472.66	2059.35	7251.7	5215.7	3573.91
2008-03-14	22237.1	2383.42	1194.84	1600.26	12241.6	15760.5	3962.67	2839.01	13817.6	944.84	8161.39	11951.1	13252.8	61991	2212.49	2117.1	29048.5	8635.92	1288.14	2285.61	432.3	3718.17	3676.88	4592.15	5631.7	6451.9	13021.4	31659	305.09	471.82	2064.41	7132	5288.5	3500.91
2008-03-17	21084.6	2312.32	1177.53	1574.44	11787.5	14809.5	3820.05	2792.75	13207.8	888.21	8005.46	11972.2	12952.1	60012	2177.01	2056.96	29048.5	8489.38	1276.6	2228.2	415.92	3524.64	3554.14	4431.04	5414.4	6182.3	12656	31659	305.09	471.82	1990.84	6774.3	5173.2	3429.44
2008-03-18	21384.6	2339.79	1180.02	1588.75	11964.2	14833.5	3668.9	2833.58	12489	900.8	8057.82	12392.7	13136.7	61933	2268.26	2081.67	29515.5	8826.44	1330.74	2268.81	427.48	3600.4	3659.75	4582.59	5605.8	6393.39	13030.5	31437	301.56	463.28	2018.76	7013.9	5163.8	3418.63
2008-03-19	21866.9	2323.57	1186.54	1622.23	12260.4	14994.8	3761.61	2833.21	13044.2	916.03	8179.35	12099.7	12709.4	58827	2209.96	2014.06	29071.3	8549.5	1298.42	2186.41	426.94	3598.28	3641.48	4555.95	5545.6	6361.22	12964.7	30873	298.35	459.48	2016.44	7073	5349.2	3467.26
2008-03-20	21108.2	2323.57	1186.54	1623.39	12260.4	14994.8	3804.05	2824.91	13548.6	911.81	8337.62	12361.3	12775.6	58987	2258.11	2014.06	29071.3	8717.56	1329.51	2191.15	425.79	3569.32	3623.02	4533.72	5495.2	6319.99	12964.2	30371	295.24	459.48	1946.79	7009.9	5182.4	3425.71
2008-03-21	21108.2	2323.57	1189.06	1645.69	12482.6	14994.8	3796.58	2824.91	13719	911.81	8524.99	12361.3	12775.6	58987	2258.11	2014.06	29071.3	8717.56	1329.51	2191.15	425.79	3569.32	3623.02	4533.72	5495.2	6319.99	12964.2	30371	295.24	459.48	1964.65	7009.9	5182.4	3425.71
2008-03-24	21108.2	2339.29	1201.02	1655.3	12480.1	15289.4	3626.19	2927.79	13098.2	946.92	8865.35	12548.6	13019.7	59813	2326.75	2014.06	29634.2	8859.61	1349.88	2219.63	425.79	3569.32	3623.02	4533.72	5495.2	6319.99	12964.2	30371	295.24	459.48	2000.95	7009.9	5182.4	3425.71
2008-03-25	22464.5	2419.62	1229.95	1674.93	12745.2	16217.5	3629.62	3000.19	13427.3	960.62	8795.09	12532.6	13322.2	61234	2341.05	2068.22	29981.1	8936.23	1352.99	2223.41	437	3690.81	3704.07	4692	5689.1	6524.71	13434.2	31453	306.52	464.48	1993.94	7234.4	5355.7	3430.28
2008-03-26	22617	2440.64	1245.42	1679.67	12706.6	16086.8	3606.86	2995.22	13489.1	953.18	8768.02	12422.9	13391.9	61415	2324.36	2079.79	30057.3	8881.55	1341.13	2219.77	438.11	3671.71	3686.16	4676.68	5660.4	6489.26	13403	31281	306.28	465.37	1995.19	7184.5	5421.3	3425.45
2008-03-27	22664.2	2451.35	1254.03	1676.24	12604.6	16015.6	3411.49	3025.2	13111.4	951.34	8605.95	12302.5	13405.8	60762	2280.83	2083.66	29987	8817.17	1325.76	2236.04	441.98	3760.48	3709.03	4719.53	5717.5	6578.06	13537.9	31669	312.83	473.39	2030.13	7265	5418.5	3404.54
2008-03-28	23286	2477.59	1258.41	1701.83	12820.5	16371.3	3580.15	3031.9	13692.8	954.53	8623.48	12216.4	13233.8	60452	2261.18	2089.71	30089.9	8762.12	1315.22	2222.93	440.99	3827.86	3700.41	4695.92	5692.9	6559.9	13442.4	31696	312.49	477.35	2049.4	7239.4	5401.2	3447.5
2008-03-31	22849.2	2447.3	1247.52	1703.99	12525.5	15644.4	3472.71	3007.36	13302.1	928.52	8572.59	12262.9	13350.1	60968	2279.1	2103.72	30913	8797.29	1322.7	2231.83	442.43	3765.91	3719.52	4707.07	5702.1	6534.97	13269	31616	312.8	477.4	2053.93	7224.3	5409.7	3470.43
2008-04-01	23137.5	2393.25	1250.41	1702.25	12656.4	15626.6	3329.16	3046.54	12460.6	941.26	8419.72	12654.4	13440.7	62775	2362.75	2136.08	31787.7	9088.49	1370.18	2250.77	453.62	3878.79	3816.73	4866	5852.6	6720.33	13699.1	32513	321.02	484.89	2063.69	7494.3	5414.5	3533.56
2008-04-02	23872.4	2342.19	1239.65	1742.19	13189.4	15750.4	3347.88	3124.61	12344.2	973.85	8605.32	12608.9	13514.1	63364	2361.4	2136.08	31467.9	9104.46	1367.53	2251.11	456.95	3933.05	3837.77	4911.97	5915.9	6777.44	13838.7	33140	325.68	488.92	2069.64	7596.6	5544.9	3592.79
2008-04-03	24264.6	2237.97	1225.58	1763.63	13389.9	15832.5	3446.24	3171.55	12652.9	970.42	8596.34	12626	13551.3	64175	2363.3	2152.62	31689.6	9140.64	1369.31	2258.59	455.3	3903.1	3783.58	4887.87	5891.3	6741.72	13738.9	33103	322.25	487.38	2052.84	7516.2	5645.8	3629.98
2008-04-04	24264.6	2277.08	1221.98	1766.49	13293.2	15343.1	3446.24	3155.56	12652.9	978.09	8596.34	12609.4	13668.2	64446	2370.98	2152.03	31545.4	9157.53	1370.4	2266.02	460.81	3919.07	3822.8	4900.88	5947.1	6763.39	13846.4	33346	320.01	493.46	2059.05	7573.5	5663.7	3631.23
2008-04-07	24577.2	2286.8	1221.07	1773.56	13450.2	15757.1	3599.62	3181.92	13396.6	983.36	8729.79	12612.4	13745	64176	2364.83	2146.28	31715.4	9184.72	1372.54	2271.04	465.38	4004.88	3866.41	4944.6	6014.8	6821.03	13919.6	33617	324.15	503.4	2103.96	7639.3	5684.1	3644.49
2008-04-08	24311.7	2249.77	1225.71	1754.71	13250.4	15587.6	3612.54	3130.42	13592.6	980.96	8672.85	12576.4	13727.5	64540	2348.76	2158.73	31726.9	9150.63	1365.54	2272.69	464.44	3962.19	3857.4	4912.69	5990.2	6771.98	13759.4	33672	320.34	498.9	2089.77	7568.1	5634.4	3605.68
2008-04-09	23984.6	2180.09	1227.74	1754.71	13111.9	15790.5	3413.91	3089.72	13078.8	990.9	8667.93	12527.3	13750.5	63477	2322.12	2149.9	31417.8	9074.82	1354.49	2262.56	461.27	3950.06	3838.49	4874.97	5983.9	6721.36	13599	33640	319.62	499.06	2115.32	7403.1	5583.5	3575.45
2008-04-10	24187.1	2235.93	1248.19	1764.64	12945.3	15695.1	3471.74	3064.6	13286.7	986.99	8829.4	12582	13909.6	63527	2351.7	2135.46	31649	9096.86	1360.55	2270.35	459.48	3889.37	3847.2	4859.42	5965.1	6704.32	13507.9	33522	316.68	499.43	2132.5	7312.6	5515.5	3540.01
2008-04-11	24667.8	2303.93	1246.79	1779.71	13323.7	15807.6	3492.89	3126.87	13328.1	986.99	8909.58	12325.4	13683	62585	2290.24	2115.12	31302.6	8936.11	1332.83	2242.14	453.43	3881.95	3802.02	4797.93	5895.5	6603.57	13278.3	33178	311.99	498.54	2112.1	7259	5505.2	3488.84
2008-04-14	23811.2	2272.48	1233.43	1746.71	12917.5	15807.6	3296.67	3042.96	12343.6	975.57	8892.68	12302.1	13738.6	62153	2275.82	2120.71	31192.5	8922.84	1328.32	2253.9	450.76	3855.44	3786.6	4766.49	5831.6	6554.49	13160.3	32803	309.54	492.59	2091.09	7139.5	5410.9	3470.96
2008-04-15	23901.3	2294.26	1244.2	1742.17	12990.6	16153.7	3348.35	3056.49	12390.8	987.47	8924.78	12362.5	13851	62618	2286.04	2121.31	31376	8978.19	1334.43	2267.93	453.28	3910.54	3789.22	4780.68	5906.9	6585.05	13408.9	32735	310.04	503.99	2113.61	7187.4	5465.9	3502.88
2008-04-16	23878.3	2337.92	1253.64	1758.56	13146.1	16244.2	3291.6	3087.49	12057.3	998.63	9066.04	12619.3	14099.5	64152	2350.11	2161.54	31910.2	9203.76	1364.71	2345.83	463.22	3981.39	3863.27	4855.1	6046.2	6702.84	13637.6	33256	316.59	509.98	2160.76	7250.7	5534.6	3502.88
2008-04-17	24259	2341.78	1256.54	1768.67	13398.3	16481.2	3222.74	3126.3	11657.1	1006.92	9090.43	12620.5	14115.5	64552	2341.83	2161.76	31786	9173.81	1365.56	2342.25	462.54	3982.31	3860.06	4862.14	5980.4	6681.81	13568.7	33162	312.48	505.43	2150.74	7173.6	5587.3	3568.94
2008-04-18	24197.8	2349.27	1267.65	1771.9	13476.5	16481.2	3094.67	3124.87	11292	1006.92	9074.34	12849.4	14237.1	64923	2402.97	2186.47	31795.7	9310.24	1390.33	2367.91	474.75	4061.83	3933.38	4961.69	6056.5	6843.08	13924.9	33881	317.27	510.9	2175.92	7418	5504.1	3557.47
2008-04-21	24721.7	2335.89	1280	1800.48	13696.5	16739.3	3116.98	3171.09	11094.3	1017.6	9083.32	12825	14321.2	64923	2408.04	2201.62	32095	9312.29	1388.17	2367.08	470.67	4020.98	3890.09	4910.35	6053	6786.55	13728.9	33663	313.53	515.96	2172.25	7394.9	5664.2	3592.54
2008-04-22	24939.2	2289.1	1279.3	1787.49	13547.8	16783.9	3147.79	3187.23	11174.8	1019.25	9037.25	12720.2	14266.3	65413	2376.94	2147	32039.7	9227.97	1375.94	2352.85	466.08	3992.6	3859.14	4872.64	6034.7	6728.3	13593.4	33491	312.09	527.54	2166.23	7328.9	5628.4	3583.26
2008-04-23	25289.2	2314.3	1288.16	1800.79	13579.2	16698	3278.33	3193.84	11784.1	1014.4	9008.49	12763.2	14069.8	64948	2405.21	2140.42	31848	9237.29	1379.93	2344.09	471.24	4048.93	3879.15	4944.65	6083.6	6795.03	13663	33427	316.12	528.49	2159.04	7324.5	5711.4	3608.47
2008-04-24	25680.8	2269.98	1293.08	1799.34	13540.9	16721.1	3583.03	3177.55	12914.8	1017.83	8990.33	12849	13966.3	64576	2428.92	2129.47	31746.2	9250.22	1388.82	2321.2	466.14	4071.84	3867.22	4929.55	6050.7	6821.32	13669.2	33589	312.89	519.59	2102.45	7460.5	5658.7	3616.81
2008-04-25	25516.8	2240.58	1288.08	1824.68	13863.5	17126	3557.75	3189.2	13105	1017.83	8947.83	12891.9	14103.9	65187	2422.93	2101.4	31009	9344.31	1397.84	2319.24	467.84	4105.39	3891.98	4978.21	6091.4	6896.58	13772.8	34013	321.46	525.81	2129.15	7509.5	5658.7	3616.81
2008-04-28	25666.3	2254.31	1295.31	1823.17	13894.4	17016	3474.72	3201.63	12782.5	1004.82	9079.6	12871.8	14085.9	65678	2424.4	2110.19	30623.4	9349.61	1396.37	2324.31	472.2	4156.77	3941.33	5012.75	6090.4	6925.33	13877.8	33948	323.79	537.35	2150.82	7550.1	5670.3	3642.63
2008-04-29	25914.2	2303.53	1283.65	1811.51	13894.4	17378.5	3523.41	3172.36	12880.9	993.75	8891.74	12831.9	13825.6	63826	2426.1	2070	30270.6	9285.91	1390.94	2287.91	471.22	4182.11	3908.3	4977.1	6089.4	6885.34	13707.2	33841	319.06	528.94	2126.57	7462	5672.6	3605.57
2008-04-30	25755.3	2304.52	1279.86	1825.47	13850	17287.3	3693.11	3147.79	13504.9	995.28	8919.92	12820.1	13937	67868	2412.8	2095.53	30281.4	9299.6	1385.59	2295.47	475.56	4264.79	3925.43	4996.54	6087.3	6948.82	13798.3	33954	318.15	535.53	2122.5	7529	5657	3624.8
2008-05-01	25755.3	2304.52	1279.86	1825.47	13766.9	17287.3	3693.11	3147.79	13504.9	993.81	8919.92	13010	14065.8	67868	2480.71	2095.53	30281.4	9395.04	1409.34	2296.13	475.56	4264.79	3925.43	4996.54	6087.3	6948.82	13798.3	33954	318.15	535.53	2122.5	7529	5652.7	3630.41
2008-05-02	26241	2342.76	1271.48	1848.27	14049.3	17600.1	3693.11	3236.1	13504.9	996.17	8963.63	13058.2	14280.3	69366	2476.99	2107.63	30551.5	9451.17	1413.9	2285.65	481.21	4353.18	3946.34	5069.71	6215.5	7043.23	14060	34527	325.13	550.24	2122.5	7665.8	5760.4	3661.33
2008-05-04	26241	2342.76	1271.48	1848.27	14049.3	17600.1	3693.11	3236.1	13504.9	996.17	8963.63	13058.2	14280.3	69366	2476.99	2107.63	30551.5	9451.17	1413.9	2285.65	481.21	4353.18	3946.34	5069.71	6215.5	7043.23	14060	34527	325.13	550.24	2140.98	7665.8	5760.4	3661.33
2008-05-05	26184	2387.99	1274.61	1848.27	14049.3	17490.9	3761.01	3248.04	13860.8	1017.81	8837.07	12969.5	14274.3	70175	2464.12	2105.57	30958.9	9438.1	1407.49	2291.17	481.38	4341.75	3943.74	5063.36	6215.5	7052.08	14074	34495	325.28	548.93	2141.35	7658.3	5797.7	3680.52
2008-05-06	26262.1	2371.83	1276.09	1859.06	14049.3	17373	3733.5	3248.75	13702.6	1007.81	8857.37	13020.8	14414.3	70195	2483.31	2127.09	31223.4	9510.98	1418.26	2337.47	480.66	4303.76	3890.15	5040.92	6215.2	7017.1	14005.8	34298	325.18	547.19	2153.32	7543.7	5777.9	3651.09
2008-05-07	25610.2	2382.7	1287.15	1854.01	14102.5	17339.3	3579.15	3228.95	12979.2	1007.81	8926.34	12814.4	14371.5	69018	2438.49	2093.99	30762.2	9339.47	1392.57	2338.41	485.3	4370.52	3906.61	5075.31	6261	7076.25	14026.8	34547	328.98	562.33	2201.47	7639.2	5757.8	3596.82
2008-05-08	25449.8	2376.93	1280.35	1848	13943.3	17080.7	3656.84	3171.88	13317.5	1007.81	8866.62	12866.8	14608	69722	2451.24	2101.85	30752	9388.54	1397.68	2348.06	484.61	4294.89	3873.16	5055.58	6270.8	7071.9	14074	34082	329	567.88	2283.99	7586.1	5800.9	3625.59
2008-05-09	25063.2	2375.03	1285.27	1823.7	13655.3	16737.1	3613.49	3162.03	13080.4	1007.81	8792.39	12745.9	14521.2	69646	2445.52	2114.44	30674.4	9327.97	1388.28	2347.54	480.4	4262.17	3826.91	4960.56	6204.7	7003.17	13945.1	33722	324.53	560.11	2283.99	7484	5844.4	3601.17
2008-05-12	25063.2	2378	1293.09	1823.7	13743.4	16860.9	3626.98	3162.03	13166.1	1010.52	8830.05	12876	14666.1	70416	2488.49	2125.36	30637.4	9417.97	1403.58	2358.45	482.07	4262.17	3842.92	4976.21	6220.6	7035.95	14053.9	33744	325.9	560.11	2321.14	7484	5894.1	3637.83
2008-05-13	25552.8	2418.9	1286.54	1842.8	13953.7	16752.9	3560.24	3203.42	13074.2	1010.51	8989.53	12832.2	14616.7	70503	2495.12	2106.69	30887.4	9410.46	1403.04	2355.11	480.48	4343.63	3827.4	4998.67	6211.9	7060.19	14016.4	33805	327.01	557.78	2339.57	7578.3	5883.2	3653.31
2008-05-14	25533.5	2449.34	1287.74	1843.75	14118.5	16978.3	3657.43	3198.51	13532.3	1026.9	9018.42	12898.4	14626.3	70027	2496.7	2088.78	31336.6	9437.45	1408.66	2344.32	488.39	4402.71	3831.66	5055.24	6216	7083.24	14187.2	34270	327.46	566.17	2406.05	7594.6	5940.3	3628.56
2008-05-15	25513.7	2449.81	1294.15	1885.71	14251.7	17353.5	3637.32	3207.43	13410.1	1024.96	9157.18	12992.7	14828.1	71492	2533.73	2122.12	31543	9553.52	1423.57	2346.58	489.9	4410.7	3798.99	5057.51	6251.8	7081.05	14186.4	34233	328.61	578.37	2411.95	7683.4	5964.9	3614.23
2008-05-16	25618.9	2468.84	1300.67	1888.88	14219.5	17434.9	3624.23	3241.49	13314.4	1024.96	9197.41	12986.8	14984.2	72767	2528.85	2137.01	31487	9603.01	1425.35	2375.72	490.78	4498.25	3796.33	5078.04	6304.3	7156.55	14124.8	34384	330.57	586.17	2478.87	7653.7	6006.1	3657.2
2008-05-19	25742.2	2510.96	1300.67	1885.37	14269.6	17434.9	3604.76	3241.49	13197.6	1032.7	9295.2	13028.2	14984.2	73439	2516.09	2194.11	31796.4	9602.78	1426.63	2374.92	496.12	4532.1	3843.78	5142.1	6376.5	7225.94	14247.6	33652	334.77	591.95	2487.92	7778.9	6035	3658.95
2008-05-20	25169.5	2510.96	1287.43	1873.15	14160.1	17230.2	3443.16	3199.88	12449.8	1013.77	9068.89	12828.7	15047.3	73517	2492.26	2218.29	31526.2	9536.01	1413.4	2405.43	487.27	4409.03	3796.85	5054.88	6191.6	7118.5	13992.1	33118	327.22	583.63	2453.12	7626.6	5994.9	3647.19
2008-05-21	25460.3	2494.71	1281.2	1847.51	13926.3	17243.2	3544.19	3196.9	12659.8	1023.77	9015.57	12601.2	14790.4	72295	2448.27	2221.13	31126.1	9397.03	1390.71	2397.67	487.62	4422.47	3765.79	5027.55	6198.1	7040.83	13857.2	33061	325.86	591.3	2467.81	7574.3	5916.4	3611.72
2008-05-22	25043.1	2503.95	1277.57	1835.42	13978.5	16907.1	3485.63	3160.86	12366.2	1023.02	9008.03	12625.6	14792.4	72295	2464.58	2248.63	31245.7	9433.35	1394.35	2383.85	485.61	4422.47	3745.38	5028.74	6181.6	7070.33	13852	33278	328.54	603.98	2433.07	7578	5920	3591.34
2008-05-23	24714.1	2465.96	1274.78	1827.94	14012.2	16649.6	3473.09	3122.15	12216.4	1023.02	8834.73	12479.6	14723.4	71452	2444.67	2235.33	31068.7	9315.78	1375.93	2371.5	478.39	4371.47	3671.92	4933.77	6087.3	6944.05	13577.6	32870	322.2	596.27	2435.2	7459.9	5866.2	3589.47
2008-05-26	24127.3	2419.73	1273.37	1800.58	13690.2	16348.5	3364.54	3103.3	11890.2	1008.63	8707.83	12479.6	14758.6	71629	2444.67	2239.38	31314.5	9315.78	1375.93	2371.5	478.29	4344.88	3668.52	4937.84	6087.3	6953.84	13583.7	32764	323.29	580.59	2436.56	7363.9	5807.5	3573.75
2008-05-27	24282	2397	1274.24	1825.23	13893.3	16275.6	3375.41	3115.35	11998.4	1021.51	8778.39	12548.4	14522.1	70992	2481.24	2214.77	31414.2	9314.02	1385.35	2349.92	473.84	4333.88	3656.04	4906.56	6058.5	6958.66	13451.4	32743	321.46	568.22	2390.6	7418	5818.4	3551.34
2008-05-28	24249.5	2433.77	1260.58	1805.64	13709.4	16525.4	3459.03	3132.78	12313.7	1025.94	8665.73	12594	14688.6	73153	2486.7	2233.41	31647	9364.34	1390.84	2358.74	481.66	4388.77	3710.92	4971.11	6069.6	7033.84	13499.2	32758	324.14	568.16	2396.87	7474.5	5754.5	3547.01
2008-05-29	24384	2446.95	1261.82	1841.22	14124.5	16316.3	3401.44	3160.78	11947.1	1035.64	8684.92	12646.2	14577.2	71798	2508.32	2223.89	31837.3	9371.87	1398.26	2354.5	483.81	4390.99	3727.43	4975.9	6068.1	7055.03	13539.5	32769	323.78	565.31	2439.03	7541.8	5817.2	3563.11
2008-05-30	24533.1	2444.35	1276.1	1852.02	14338.5	16415.6	3433.35	3192.62	12048.2	1035.64	8619.08	12638.3	14714.7	72593	2522.66	2205.72	31975.5	9401.08	1400.38	2355.12	485.52	4394.71	3751.41	5014.28	6053.5	7096.79	13600.9	33225	324.71	574.66	2459.88	7511.3	5773.9	3624.23
2008-06-02	24831.4	2427.77	1262.49	1847.53	14440.1	16063.2	3459.04	3188.05	12057.2	1026.45	8724.47	12503.8	14814.2	71897	2491.53	2197.82	31636.2	9316.61	1385.67	2353.97	479.15	4380.28	3692.39	4935.21	6007.6	7008.77	13300	32717	321.87	574.28	2452.76	7555.7	5781.2	3624.23
2008-06-03	24375.8	2403.81	1257.57	1819.39	14209.2	15962.6	3436.4	3153.94	11991.6	1033.95	8579.43	12402.9	14728.6	70012	2480.48	2181.76	31492.6	9262	1377.65	2340.38	483.9	4393.14	3717.96	4983.71	6057.7	7019.13	13431.7	32813	322.87	576.23	2429.47	7590.4	5703	3540.05
2008-06-04	24123.2	2362.59	1253.12	1833.81	14435.6	15514.8	3369.91	3134.8	11970.5	1025.47	8627.8	12390.5	14690.5	68673	2503.14	2141.25	31448.1	9212.76	1377.2	2331.42	478.57	4310.13	3713.01	4915.07	5970.1	6965.43	13341.2	32508	318.34	562.14	2353.49	7514.5	5698.2	3557.69
2008-06-05	24255.3	2399.68	1223.56	1832.31	14341.1	15769.7	3351.65	3143.89	11860.3	1034.86	8738.46	12604.5	14982.9	71235	2549.94	2189.6	31726	9408.49	1404.05	2368.64	482.26	4325.59	3755.04	4907.06	5995.3	6941.83	13239.3	32542	317.62	559.37	2351.78	7567.2	5633.8	3555.97
2008-06-06	24402.2	2402.24	1248.57	1832.31	14489.4	15572.2	3329.67	3146.73	11734	1034.86	8745.35	12209.8	14969.5	69786	2474.56	2179.72	31149.1	9152.51	1360.68	2353.71	471.23	4272.13	3672.84	4795.32	5906.8	6803.81	12909.8	31754	317.62	567.65	2377.91	7386.4	5691.2	3548.08
2008-06-07	24402.2	2402.24	1248.57	1832.31	14489.4	15572.2	3329.67	3146.73	11734	1034.86	8745.35	12209.8	14969.5	69786	2474.56	2179.72	31149.1	9152.51	1360.68	2353.71	471.23	4272.13	3672.84	4795.32	5906.8	6803.81	12909.8	31754	317.62	567.65	2342.7	7386.4	5691.2	3548.08
2008-06-09	24402.2	2410.08	1230.98	1808.96	14181.4	15066.1	3329.67	3084.02	11734	1034.86	8587.96	12280.3	14960.8	69281	2459.46	2162.12	30933.4	9149.09	1361.76	2344.15	469.82	4244.64	3640.71	4799.38	5877.6	6815.63	12823.9	31721	310.13	564.05	2357.79	7325.9	5691.2	3496.5
2008-06-10	23375.5	2373.82	1230.96	1774.38	14021.2	14889.2	3072.33	3033.05	10765.9	1017.05	8370	12289.8	14736.2	67775	2448.94	2109.73	30898.9	9067.1	1358.44	2321.26	464.19	4166.44	3617.45	4761.08	5827.3	6771.1	12755.2	31343	307.36	557.49	2339.29	7284.2	5544.3	3505.9
2008-06-11	23327.6	2374.78	1229.28	1781.67	14183.5	15185.3	3024.24	3046.77	10458.1	1017.74	8345.59	12083.8	14716.5	66795	2394.01	2072.08	30446.2	8941.27	1335.49	2312.41	456.34	4097.78	3546.89	4660.91	5723.3	6650.26	12584.3	30728	302.36	552.95	2356.71	7167.3	5561.9	3487.43
2008-06-12	23023.9	2409.01	1225.54	1739.36	13888.6	15250.2	2957.53	3020.15	10340.1	1021.06	8062.31	12141.6	14602.6	67322	2404.35	2056.69	30475.4	8947.73	1339.87	2293.52	459.11	4196.15	3585.69	4672.3	5790.5	6714.52	12853.3	30890	305.22	560.37	2356.71	7222.79	5433.2	3439.22
2008-06-13	22592.3	2398.42	1229.35	1747.35	13973.7	15189.6	2868.8	2979.56	9936.73	1016.68	8105.59	12307.4	14778.5	67204	2454.5	2066.44	30413.5	9063.23	1360.03	2301.72	459.96	4203.83	3588.41	4682.3	5802.8	6765.32	12998.7	30942	305.52	562.71	2356.71	7261.4	5479.6	3416
2008-06-16	23029.7	2398.04	1238.06	1760.82	14354.4	15395.8	2874.1	3036.92	9825.27	1027.04	8169.77	12269.1	14944.3	67285	2474.78	2066.44	30354.2	9087.88	1360.14	2314.22	458.7	4225.54	3566.6	4657.74	5794.6	6729.88	12826.6	30817	306.37	569.91	2366.32	7238.3	5476.3	3406.3
2008-06-17	23058	2377.98	1227.76	1750.71	14348.4	15696.9	2794.75	3028.24	9429.5	1041.64	8201.79	12160.3	15068.8	68438	2457.73	2036	29925.3	9074.41	1350.93	2312.41	459.83	4269.19	3581.8	4686.33	5861.9	6796.16	12885.1	30971	309.25	575.02	2399.15	7251.4	5525.9	3404.57
2008-06-18	23325.8	2364.58	1212.59	1774.13	14452.8	15422.3	2941.11	3040.09	9903.14	1036.27	8217.58	12029.1	15073.1	67090	2429.71	2048.11	29618.1	8999.56	1337.81	2307.33	450.57	4193.73	3520.73	4618.75	5756.9	6728.91	12631.5	30464	303.6	567.87	2402.74	7182.6	5550.3	3391.63
2008-06-19	22797.6	2373.06	1196.39	1740.72	14130.2	15088	2748.87	2992.66	9161.56	1036.27	8047.74	12063.1	14790.1	66590	2462.07	2063.19	29847.8	8988.84	1342.83	2283.23	446.68	4152.7	3441.42	4591.39	5708.4	6721.17	12585	30368	301.37	565.82	2400.84	7158.9	5484.3	3340.1
2008-06-20	22745.6	2371.78	1206.67	1731	13942.1	14571.3	2831.74	3001.81	9373.69	1036.27	7902.44	11842.7	14580.7	64614	2406.09	2066.28	29533.4	8829.25	1317.93	2240.38	437.33	4059.6	3368.67	4509.27	5620.8	6578.44	12412.5	29854	301.37	553.39	2384.75	7069.4	5411.8	3283.43
2008-06-23	22715	2362.74	1195.41	1715.59	13857.5	14293.3	2760.42	2979.15	9238.86	1028.45	7876.49	11842.4	14691.8	64640	2385.74	2091.55	29464.5	8841.89	1318	2254.14	437.44	4057.36	3350.49	4511.37	5667.2	6589.46	12403.4	29727	295.4	548.63	2342.39	7026.9	5408.9	3287.56
2008-06-24	22456	2365.38	1200.28	1710.84	13849.6	14106.6	2803.02	2962.16	9525.66	1017.78	7738.12	11807.4	14409.6	64168	2368.28	2067.59	29291.6	8803.34	1314.29	2231.09	437.38	4017.02	3318.54	4473.76	5634.7	6536.06	12205.6	29579	289.44	543.03	2308.88	7026.1	5418.8	3298.18
2008-06-25	22635.2	2341.36	1209.11	1717.79	13829.9	14220.1	2905.01	2986.62	9982.18	1021.32	7855.06	11811.8	14441.1	65853	2401.26	2091.92	29569.4	8865.8	1321.97	2238.95	439.56	4049.16	3361.65	4536.29	5666.1	6617.84	12446.1	30009	293.54	543.4	2310.73	7081.4	5363.1	3281.29
2008-06-26	22455.7	2350.89	1203.89	1717.66	13822.3	14421.8	2901.85	2980.95	9999.66	1002.3	7811.8	11453.4	14292.1	63947	2321.37	2072.48	29199.9	8640.74	1283.15	2208.69	426.03	3933.24	3205.78	4426.19	5518.2	6459.6	12077.7	29373	284.75	536.17	2308.76	6949.7	5421.5	3291.97
2008-06-27	22042.3	2332.11	1190.54	1684.45	13544.4	13802.2	2748.43	2955.91	9436.21	1002.3	7548.76	11346.5	14355.2	64321	2315.63	2093.01	29295	8623.51	1278.38	2210.84	425.92	3914.56	3177.42	4397.32	5529.9	6421.91	12089.8	29198	279.82	532.06	2318.61	6861.5	5349.4	3226.91
2008-06-30	22102	2349.1	1186.57	1674.92	13481.4	13461.6	2736.1	2947.54	9370.78	984.4	7523.54	11350	14467	65018	2292.98	2107.87	29395.5	8660.48	1280	2232.05	425.93	3943.15	3168.22	4434.85	5625.9	6418.32	12046.2	29346	278.75	536.94	2303.34	6958.5	5332.9	3194.61
2008-07-01	22102	2378.81	1174.83	1666.46	13463.2	12961.7	2651.61	2906.79	9096.97	984.4	7407.98	11382.3	14467	63396	2304.97	2095.12	29221.1	8641.28	1284.91	2218.06	414.52	3828.51	3102.49	4341.21	5479.9	6315.94	11770.9	28786	272.92	528.46	2242.74	6849.7	5261.1	3175.27
2008-07-02	21704.5	2378.47	1153.7	1623.6	13286.4	13664.6	2651.73	2906.23	9162.14	971.71	7353.86	11215.5	14034.1	61106	2251.46	2033.03	28680.8	8465.51	1261.52	2186.02	408.4	3800.73	3081.83	4296.48	5426.3	6305.42	11856.9	28974	274.65	531.38	2255.46	6843.8	5211.6	3163.39
2008-07-03	21242.8	2286.61	1153.7	1606.54	13265.4	13094.1	2703.53	2880.45	9398.17	933.79	7394.1	11288.5	14143.6	59273	2245.38	1998.37	28465.5	8481.54	1262.9	2161.13	408.55	3865.12	3087.57	4343.99	5476.6	6353.74	11980.1	29094	274.1	515.64	2211.73	6844.1	5094	3094.42
2008-07-04	21423.8	2314.75	1134.14	1577.94	13237.9	13454	2669.89	2892.54	9400.72	933.79	7228.41	11288.5	14010.4	59365	2245.38	2006.44	28338.1	8481.54	1262.9	2161.13	403.36	3728.48	3016.44	4266	5412.8	6272.21	11765.9	28541	270.87	515.19	2187.65	6772.7	5170	3157.92
2008-07-07	21913.1	2303.82	1127.26	1579.72	13360	13526	2792.4	2934.12	9902.98	927.96	7341.11	11232	13712.8	59088	2243.32	1955.33	28383.5	8400.21	1252.31	2144.37	411.12	3802.17	3067.45	4342.59	5512.7	6395.75	11982.2	28892	274.56	519.7	2189.03	6815.7	5091.7	3121.45
2008-07-08	21220.8	2278.97	1121.25	1533.47	13033.1	13349.6	2814.95	2886.62	9950.27	921.46	7051.85	11384.2	13809.8	59536	2294.42	1947.78	28551.2	8515.79	1273.7	2137.14	402.79	3713.23	3010.44	4275.61	5440.5	6304.41	11794.7	28306	269.13	506.44	2175.02	6788.1	5022.4	3160.59
2008-07-09	21805.8	2286.03	1139.81	1519.38	13052.1	13964.3	2920.55	2917.62	10355.4	927.16	7048.25	11147.4	13610.8	59536	2234.89	1947.78	28095.8	8371.63	1244.69	2152.82	410.83	3793.28	3086.62	4339.66	5529.6	6386.46	11999.8	28771	273.76	512.23	2178.9	6921.4	5089.4	3177.46
2008-07-10	21821.8	2276.23	1135.49	1537.43	13067.2	13926.2	2875.45	2901.58	10178.6	925.96	7075.65	11229	13743.9	60253	2257.85	1940.15	27877.3	8435.94	1253.39	2159.57	401.93	3676.86	3022.3	4231.56	5406.8	6305	11739.5	28437	268.58	504.31	2186.35	6803.1	5020.5	3112.56
2008-07-11	22184.5	2276.85	1150.39	1567.51	13039.7	13469.9	2856.63	2926.84	10031.4	931.68	7244.76	11100.5	13709.1	60148	2239.08	1906.52	27614.5	8347.24	1239.49	2147.47	391.98	3546.53	2959.35	4100.64	5261.6	6153.3	11383.5	27676	262.64	504.96	2167.18	6638.9	5067.8	3121.54
2008-07-14	22014.5	2259.54	1144	1558.62	13010.2	13330.5	2878.26	2904.12	10054.3	917.82	7156.96	11055.2	13741.3	60721	2212.87	1922.01	27517.1	8287.76	1228.3	2159.72	395.35	3546.95	2969.06	4142.53	5300.4	6200.25	11443	27748	265.53	495.51	2208.06	6675.3	5007.9	3080.1
2008-07-15	21174.8	2214.85	1127.6	1509.33	12754.6	12676.2	2779.45	2830.75	9649.02	894.96	6834.24	10962.5	13357.6	61015	2215.71	1878.83	27435.8	8157.8	1214.91	2124.2	383.66	3386.82	2863.44	4061.15	5171.9	6081.7	11151.6	27044	261.26	478	2174.22	6562	4910.1	3040.45
2008-07-16	21223.5	2218.12	1119.42	1507.4	12760.8	12575.8	2705.87	2835.32	9323.38	892.86	6710.64	11239.3	13503.8	62056	2284.85	1877.43	27968.8	8332.82	1245.36	2129.9	383.99	3436.38	2905.4	4112.45	5150.6	6155.37	11287.7	27194	264.32	470.04	2175.46	6583.5	4947.5	3059.36
2008-07-17	21734.7	2167.71	1121.17	1525.56	12888	13111.9	2684.78	2864.1	9288.37	913.76	6974.51	11446.7	13460.2	60109	2312.3	1893.43	28215.9	8415.05	1260.32	2132.34	392.66	3527.25	2999.85	4225.99	5286.3	6271.27	11642.1	27668	274.02	480.04	2223.48	6739.2	4977.4	3091.38
2008-07-18	21874.2	2141.14	1105.04	1509.99	12803.7	13635.4	2778.37	2847.73	9588.4	891.31	6815.32	11496.6	13516	59988	2282.78	1907.11	28169.8	8453.85	1260.68	2147.63	395.94	3602.12	3075.21	4299.36	5376.4	6382.65	11895.3	28100	280.37	478.45	2135.38	6827.3	4915.3	3120.91
2008-07-21	22532.9	2195.07	1103.48	1562.92	12803.7	13850	2861.42	2919.21	9870.99	936.68	7085.67	11467.3	13689.2	60772	2279.53	1981.76	27988.5	8499.74	1260	2155.31	400.36	3664.58	3116.32	4327.14	5404.3	6424.84	11784.6	28220	282.5	487.1	2144.18	6858.2	5075.4	3148.32
2008-07-22	22527.5	2212.75	1109.57	1561.23	13185	14104.2	2846.12	2890.66	9851.29	933.64	7065.65	11602.5	13643.2	59647	2303.96	1956.77	27592.2	8566.65	1277	2171.06	400.2	3663.57	3058.95	4327.26	5364.1	6442.79	11610.1	28230	275.43	482.16	2123.66	6922.3	5075.9	3143.91
2008-07-23	23134.5	2225.84	1139.41	1591.76	13312.9	14942.3	2837.85	2978.98	9734.72	948.52	7309.83	11632.4	13512.7	59421	2325.88	1940.74	27644.8	8580.57	1282.19	2157.91	405.38	3722.53	3144.82	4408.74	5449.9	6536.09	11934.9	28841	280.36	479.73	2111.93	7058.2	5161.6	3201.65
2008-07-24	23087.7	2257.05	1141.59	1626.14	13603.3	14777	2910.29	2977.91	10006	940.26	7368.08	11349.3	13206.1	57434	2280.11	1901.88	27644.8	8369.91	1252.54	2124.38	396.65	3620.14	3107.22	4347.99	5362.3	6440.7	11675.1	28665	273.14	473.46	2066.7	7056.9	5188.4	3287.23
2008-07-25	22740.7	2245.34	1141.75	1597.93	13334.8	14274.9	2865.1	2922.91	9923.16	949.68	7233.62	11370.7	13378.8	57199	2310.53	1910.23	27084.8	8395.58	1257.76	2152.01	395.77	3598.95	3059.56	4377.18	5352.6	6436.71	11589.9	28661	273.48	468.61	1951.29	7015	5028.9	3254.16
2008-07-28	22687.2	2275.68	1154.09	1598.29	13353.8	14349.1	2903.01	2910.36	9974.14	938.53	7233.62	11131.1	13304	56869	2264.22	1922.73	26732.8	8260.19	1234.37	2134.37	392.98	3562.8	2999.77	4324.45	5312.6	6351.15	11484.6	28369	271.36	475.46	1928.74	6968.9	4989.9	3256.57
2008-07-29	22258	2278.68	1150.8	1567.2	13159.5	13791.5	2850.31	2886.56	9791.87	939.26	7014.47	11397.6	13342.5	58043	2319.62	1926.68	27318.6	8419.2	1263.2	2144.03	395.1	3631.35	2991.17	4320.49	5319.2	6398.8	11683.8	28278	271.48	478.64	1896.28	6993.3	4923.3	3235.5
2008-07-30	22690.6	2278.68	1159.94	1577.7	13367.8	14287.2	2836.67	2925.5	9715.79	946.78	7070.35	11583.7	13683.2	59998	2329.72	1949.84	27474	8565.31	1284.26	2186.51	404.39	3641.79	3030.25	4400.55	5420.7	6460.12	11817.9	28415	276.5	486.19	1949.03	7108.9	5008.7	3287.76
2008-07-31	22731.1	2304.51	1163.09	1594.67	13376.8	14355.8	2775.72	2929.65	9470.33	945.14	7024.06	11378	13592.9	59505	2325.55	1919.82	27501	8438.64	1267.38	2144.24	399.95	3659.74	2994.38	4392.36	5411.9	6479.56	11881.3	28331	276.69	494.33	1966.68	7141.2	5052.6	3336.28
2008-08-01	22862.6	2248.75	1159.1	1573.77	13094.6	14656.7	2801.82	2906.07	9556.91	938.69	7002.54	11326.3	13496.5	57630	2310.96	1884.06	26959.2	8379.15	1260.31	2148.2	394.53	3602.91	2983.55	4314.34	5354.7	6396.46	11569.5	28130	273.39	479.67	1941.73	7141.2	4978	3303.16
2008-08-04	22514.9	2227.68	1148.68	1543.05	12933.2	14577.9	2741.74	2876.08	9375.69	928.46	6977.36	11284.1	13496.5	55609	2285.56	1812.75	26487.8	8268.65	1249.01	2117.97	392.48	3580.93	2947.03	4280.63	5320.2	6349.81	11447.6	27826	271.17	475.52	1895.86	7078.2	4957.6	3319.22
2008-08-05	21949.8	2185.62	1128.86	1535.54	12914.7	14961.1	2690.75	2860.51	9080.22	936.84	6813.4	11615.8	13242.2	56471	2349.83	1809.15	26990.2	8471.85	1284.88	2128.13	403.46	3595	3048.46	4386.35	5454.5	6518.7	11751.4	28753	279.57	465.11	1812	7190.8	4882	3295.68
2008-08-06	21949.8	2187.2	1133.59	1578.71	13254.9	15073.5	2719.37	2886.78	9047.14	928.91	7026.24	11656.1	13453.5	57542	2378.37	1871.66	27342.4	8501.44	1289.19	2137.75	410.51	3665.99	3124.04	4448.33	5486.1	6561.39	11774.4	29014	283.4	471.99	1814.6	7209.3	5018.1	3352.34
2008-08-07	22104.2	2199.01	1129.56	1564	13125	15117.2	2727.58	2834.71	9035.29	926.81	7024.58	11431.4	13385.2	57018	2355.73	1815.98	26987	8338.4	1266.07	2100.6	405.69	3668.32	3046.81	4457.43	5477.5	6543.49	11717.5	29154	282.08	476.9	1842.58	7182.1	5030	3378.89
2008-08-08	21885.2	2195.93	1120.31	1568.72	13168.4	15167.8	2605.72	2807.54	8658.78	929.58	7209.04	11734.3	13341.7	56584	2414.1	1776.66	27132.8	8460.32	1296.32	2073.35	408.52	3638.21	3068.44	4491.85	5489.2	6561.65	11799.9	29089	283.71	472.35	1722.71	7262.1	5037.6	3357.82
2008-08-11	21859.3	2133.92	1127.46	1581.09	13430.9	15503.9	2470.07	2825.39	8170.15	928.18	7325.62	11782.4	13203.2	54720	2439.95	1708.95	26943.7	8492.94	1305.32	2061.35	412.13	3638.78	3103.96	4538.49	5541.8	6609.63	12047.7	29557	288.34	474.51	1742.96	7337.7	5069.3	3370.19
2008-08-12	21640.9	2057.58	1118.78	1577.12	13303.6	15212.1	2457.2	2816.82	8192.8	928.53	7293.8	11642.5	13167	54503	2430.61	1696.6	26636.5	8398.71	1289.59	2052.09	415.56	3598.07	3117.14	4518.48	5534.5	6585.87	11996.1	29380	287.22	470.42	1803.82	7301.8	5090.3	3353.63
2008-08-13	21293.3	2063.52	1112.53	1562.72	13023	15093.1	2446.3	2811.79	8249.64	917.39	7292.34	11533	13377.2	54573	2428.62	1742.93	26877.1	8375.39	1285.83	2067.94	410.33	3515.45	3043.62	4402.97	5448.6	6422.19	11695.4	28758	280.27	462.48	1776.06	7193.5	4995.9	3345.24
2008-08-14	21392.7	2106.64	1109.43	1572.19	12956.8	14724.2	2437.08	2816.66	8278.65	926.74	7326.07	11615.9	13358.9	55138	2453.67	1737.94	27247.5	8385.97	1292.93	2056.15	409.41	3515.92	3054.43	4420.91	5497.4	6442.21	11606.8	28778	281.94	468.81	1795.23	7206.5	5039	3333.9
2008-08-15	21160.6	2085.15	1095.05	1572.19	13019.4	14724.2	2450.61	2797.5	8233.41	917.46	7196.5	11659.9	13096.7	54244	2452.52	1733.79	27340.8	8383.67	1298.2	2036.45	409.86	3515.92	3083.01	4453.62	5454.8	6446.02	11686.1	28778	281.77	467.15	1785.36	7235.9	5038.9	3351.13
2008-08-18	20930.7	2085.15	1084.36	1567.71	13165.5	14645.7	2319.87	2776.98	7833.09	939.95	7000.74	11479.4	13119.4	53327	2416.98	1733.79	26777.5	8281.86	1278.6	2037.46	410.51	3542.42	3074.45	4448.84	5450.2	6432.88	11677.5	28867	282.24	475.27	1778.29	7231.4	5043.5	3334.15
2008-08-19	20484.4	2042.5	1069.42	1541.41	12865	14543.7	2344.47	2728.39	7963.57	931.23	6978.6	11348.5	13063.9	53639	2384.36	1727.78	26732.1	8212.47	1266.69	2039.37	398.75	3415.53	3002.4	4332.79	5320.4	6282.43	11335.3	28257	271.15	467.67	1685.6	7115.2	4930.4	3319.12
2008-08-20	20931.3	2069.7	1073.21	1540.71	12851.7	14678.2	2523.28	2751.75	8531.15	941.46	7040.9	11417.4	13350.1	55377	2389.08	1740.26	26865	8276.91	1274.54	2063.38	402.59	3495.37	3000.52	4365.87	5371.8	6317.8	11379.9	28148	272.26	475.05	1713.5	7100	4997.5	3332.02
2008-08-21	20392.1	2088.25	1071.43	1512.59	12752.2	14243.7	2431.72	2713.47	8243.03	933.69	6918.48	11430.2	13539.2	55935	2380.38	1746.12	26535	8314.14	1277.72	2090.59	400.23	3481.18	2970.91	4304.61	5370.2	6236.96	11217.4	27758	270.61	485.08	1722.41	7000.5	4949.6	3332.05
2008-08-22	20392.1	2120.49	1085.6	1496.91	12666	14401.5	2405.23	2723.3	8101.68	933.69	6911.64	11628.1	13447.3	55850	2414.71	1760.98	26875.5	8373.55	1292.2	2084.49	408.19	3527.04	3028.23	4400.45	5505.6	6342.42	11497.3	28090	278.58	488.5	1701.61	7094.1	5010.2	3311.61
2008-08-25	21104.8	2127.22	1078.73	1502.11	12878.7	14450.4	2413.37	2733.45	8065.45	943.93	7030.72	11386.2	13289	54477	2365.59	1744.74	26416.6	8229.03	1266.84	2056.4	402.7	3538.21	3003.93	4355.87	5505.6	6296.95	11327.1	27900	274.82	483.06	1647.67	7062.6	5090.1	3326.92
2008-08-26	21056.7	2107.55	1070.5	1490.25	12778.7	14482.2	2350.08	2707.19	7887.37	939.71	6964.6	11412.9	13299.1	54359	2361.97	1760.17	26071.5	8263.72	1271.51	2058.83	403.24	3558.94	3025.14	4368.55	5470.7	6340.52	11419.9	27977	276.59	479.15	1579.12	7093.7	5082.3	3321
2008-08-27	21464.7	2131.06	1067.65	1493.92	12753	14296.8	2342.15	2705.09	7827.16	932.28	7080.97	11502.5	13530.6	55519	2382.46	1779.74	26131.3	8349.84	1281.66	2077.44	406.12	3553.21	3033.67	4373.08	5528.1	6321.03	11479.6	27958	277.03	486.44	1589.05	7086.6	5087.8	3318.52
2008-08-28	20972.3	2144.85	1070.46	1474.15	12768.2	14048.3	2350.14	2691	7817.05	923.63	7033.37	11715.2	13750.5	56382	2411.64	1777.05	26444.1	8466.12	1300.68	2086.77	411.13	3570.81	3091.8	4461.49	5601.2	6420.54	11662.6	28625	281.45	491.29	1653.99	7190.4	5143.3	3324.8
2008-08-29	21261.9	2165.94	1100.5	1474.24	13072.9	14564.5	2397.37	2739.95	8004.24	934.23	7046.11	11543.5	13771.2	55680	2367.52	1777.14	26291	8382.08	1282.83	2079.22	412.84	3613.32	3136	4482.6	5636.6	6422.3	11707.3	28789	280.13	493.81	1646.14	7238.7	5215.5	3353.24
2008-09-01	20906.3	2164.62	1100.5	1414.43	12834.2	14498.5	2325.14	2713.79	7685.24	909.28	6813.09	11543.5	13771.2	55162	2367.52	1778.81	26424.7	8382.08	1282.83	2079.22	412.09	3574.29	3144.27	4472.13	5602.8	6421.8	11693.8	28775	280.83	483.98	1666.52	7227.8	5200	3357.7
2008-09-02	21042.5	2159.05	1086.99	1407.14	12609.5	15049.9	2304.89	2758.94	7578.36	918.93	6699.82	11516.9	13299.5	54404	2349.24	1757.94	26522.8	8296.97	1277.58	2026.24	414.7	3587.3	3211.59	4539.07	5620.7	6518.47	11903.9	29208	284.95	469.7	1659.65	7298.6	5195	3367.25
2008-09-03	20585.1	2116	1085.38	1426.89	12689.6	15049.9	2276.67	2706.53	7413.55	905.26	6584.93	11532.9	13137.7	53527	2333.73	1758.13	26467.8	8269.25	1274.98	1988.42	406.32	3562.45	3165.33	4447.13	5499.7	6467.49	11849.1	29061	282.4	458.17	1589.19	7256.6	5130.5	3373.45
2008-09-04	20389.5	2075.23	1085.06	1426.43	12557.7	14899.1	2277.41	2626.05	7473.6	902.15	6412.63	11188.2	12814.1	51409	2259.04	1694.6	26151.6	8008.25	1236.83	1934.4	397.17	3437.22	3066.15	4304.01	5362.1	6279.57	11480.1	28233	273.31	443.82	1526.57	7084.6	5050.9	3348.14
2008-09-05	19933.3	2022.56	1070.54	1404.38	12212.2	14483.8	2202.45	2574.21	7264.2	902.15	6307.28	11221	12816.4	51940	2255.88	1678.74	25904.2	8033.76	1242.31	1928.82	389.22	3350.19	3002.39	4196.66	5240.7	6127.44	11139.7	27567	265.86	431.76	1469.15	6976.6	4949.5	3336.18
2008-09-08	20794.3	2038	1075.93	1476.65	12624.5	14945	2143.42	2694.49	7004	913.26	6658.69	11510.7	12634.6	50718	2269.76	1668.21	26232.6	8168.62	1267.79	1921.56	398.79	3464.04	3134.48	4340.18	5446.3	6263.74	11554.2	28429	274.8	441.28	1508.41	7177.4	5126.3	3374.4
2008-09-09	20491.1	1958.75	1068.55	1454.5	12400.6	14900.8	2145.78	2673.21	7022.18	895.92	6424.77	11230.7	12146.8	48435	2209.81	1595.07	25629.8	7871.15	1224.51	1867.29	395.73	3400.02	3103.85	4293.34	5415.6	6233.41	11350	28263	271.52	417.14	1395.11	7189.5	5041.9	3376.39
2008-09-10	19999.8	1885.04	1062.7	1464.98	12346.6	14662.6	2150.76	2622.41	7065.47	885.49	6458.01	11268.9	12497.1	49633	2228.7	1604.84	25622.9	7957.26	1232.04	1885.22	393.9	3299.49	3055.38	4283.66	5366.2	6210.32	11180.8	28064	269.42	416.4	1334.33	7121.4	4961.4	3343.86
2008-09-11	19388.7	1870.13	1041.07	1443.24	12102.5	14324.3	2078.98	2541.15	6876.25	863.13	6251.95	11433.7	12612.8	51270	2258.22	1613.24	25552.5	8011.25	1249.05	1877.23	392.56	3255.55	3021.06	4249.07	5318.4	6178.9	11136.5	27942	265.37	418.5	1298.08	7071.3	4871.5	3333.54
2008-09-12	19352.9	1804.06	1044.03	1477.92	12214.8	14000.8	2079.67	2570.67	6935.07	884.14	6310.68	11422	12769.6	52393	2261.27	1647.65	25588.4	8091.84	1251.7	1905.75	399.57	3321.2	3080.6	4332.66	5416.7	6234.89	11412	28372	270.74	431.24	1341.75	7215.5	4957.1	3361.69
2008-09-15	19352.9	1719.25	1031.63	1477.92	12214.8	13531.3	2079.67	2486.55	6935.07	838.39	6052.45	10917.5	12254	48416	2179.91	1562.14	24618.2	7680.15	1192.7	1846.69	385.04	3199.82	2973.01	4168.97	5204.2	6064.16	10899	27333	262.83	413.07	1277.6	6939.1	4875	3319.9
2008-09-16	18300.6	1735.64	1012.37	1387.75	11609.7	13518.8	1986.64	2461.43	6873.61	798.5	5756.59	11059	12227	49229	2207.9	1571.78	24618.2	7793.13	1213.6	1835.6	371.2	3077.51	2878.92	4087.4	5025.6	5965.17	10911.5	26589	258.5	392.85	1131.12	6732.9	4799.9	3227.3
2008-09-17	17637.2	1769.89	1002.99	1425.26	11749.8	13262.9	1929.05	2419.29	6680.06	774.81	5800.87	10609.7	11877.7	45909	2098.85	1491.98	23456.8	7440.39	1156.39	1794.39	356.98	2939.2	2788.95	4000.11	4912.4	5860.98	10661.4	25920	248.62	380	1058.84	6654.3	4769.7	3269.93
2008-09-18	17632.5	1787.67	991.66	1392.42	11489.3	13315.6	1895.84	2419.21	6563.07	749.95	5641.95	11019.7	12064.6	48423	2199.1	1508.07	24577.9	7775.16	1206.51	1872.73	351.66	2881.47	2783.91	3957.86	4880	5863.42	10631.6	25664	247.59	388.59	1058.84	6623.3	4651.9	3158.92
2008-09-19	19327.7	1891.73	1025.7	1455.78	11920.9	14042.3	2075.09	2559.07	7154	767.57	5970.38	11388.4	12913	53055	2273.9	1662.52	25701	8187.13	1255.08	1931.06	381.83	3212.98	3052.83	4324.87	5311.3	6189.53	11557.9	27877	268.01	421.72	1295.91	7025.2	4840.7	3187.13
2008-09-22	19632.2	1897.34	1028.62	1460.34	12090.6	13995	2236.41	2544.13	7469.07	804.24	6110.6	11015.7	12638.1	51541	2178.98	1690.45	25131.9	7918.61	1207.09	1902.55	375.19	3220.36	2967.7	4223.51	5236.3	6107.75	11328.5	27438	265.04	422.23	1309.5	6887.4	5050.1	3255.72
2008-09-23	18872.8	1873.1	1026.18	1481.37	12090.6	13570.3	2201.51	2476.51	7062.08	791.49	6182.21	10854.2	12532.6	49593	2153.34	1656.6	24969.2	7785.27	1188.22	1899.96	367.64	3109.9	2892.93	4139.82	5136.1	6068.53	11176.5	27067	260.24	416.4	1272.13	6805.5	4957.7	3228.19
2008-09-24	18962	1883.55	1028.4	1495.98	12115	13692.5	2216.81	2477.6	7083.45	789.83	6132.6	10825.2	12513.4	49843	2155.68	1655.81	24944.2	7768.82	1185.87	1885.45	360.62	3123.83	2866.17	4114.54	5095.6	6052.87	11112.9	26929	258.86	410.19	1315.43	6780.3	5008.2	3259.68
2008-09-25	18934.4	1870.06	1024.74	1501.63	12006.5	13547.2	2297.5	2444.24	7376.84	812.17	6060.83	11022.1	12546.5	51828	2186.57	1707.98	25645.5	7927.87	1209.18	1922.87	369.35	3104.61	2906.24	4226.81	5197	6173.03	11438.6	27573	264.94	407.41	1304.99	6945.5	4960.8	3237.72
2008-09-26	18682.1	1846.09	1020.53	1476.33	11893.2	13102.2	2293.78	2411.46	7559.27	812.17	5929.63	11143.1	12126	50783	2183.34	1692.4	25593.8	7890.37	1213.27	1916.44	354.58	2998.08	2814.11	4163.38	5088.5	6063.5	11387.9	27154	260.279	387.77	1285.47	6815.5	4934.6	3187.58
2008-09-29	17880.7	1832.51	1019.72	1456.36	11743.6	12595.8	2293.78	2361.34	7559.27	810.59	5929.63	10365.5	11285.1	46028	1983.73	1545.45	23955.7	7204.01	1106.42	1758.92	323.55	2756.7	2589.47	3953.48	4818.8	5807.08	10945.7	25803	246.2	357.57	1194.11	6500.1	4839.2	3188.54
2008-09-30	18016.2	1832.51	1018.68	1448.06	11259.9	12860.4	2293.78	2358.91	7559.27	810.59	5719.28	10850.7	11752.9	49541	2082.33	1598.17	24888.9	7532.8	1164.74	1786.89	331.45	2767.76	2672.2	4032.1	4902.5	5831.02	10987.5	25530	245.23	375.62	1211.84	6654.9	4631.3	3090.22
2008-10-01	18016.2	1832.51	1018.68	1439.67	11368.3	13055.7	2293.78	2358.91	7559.27	810.59	5764.01	10831.1	11714.5	49799	2069.4	1605.68	25117.3	7519.95	1161.06	1832.99	334.24	2767.38	2716.48	4054.54	4959.6	5806.33	11182.5	25681	245.43	365.4	1189.06	6727.6	4814.5	3187.96
2008-10-02	18211.1	1832.51	1018.68	1419.65	11154.8	13055.7	2293.78	2363.6	7559.27	762.54	5703.72	10482.9	10900.5	46145	1976.72	1520.92	24027.3	7155.41	1114.28	1762.44	330.83	2644.84	2741.08	3963.28	4870.3	5660.63	11002.3	25258	243.03	345.68	1152.7	6730.9	4774.1	3232.64
2008-10-03	17682.4	1832.51	1016.7	1419.65	10938.1	12526.3	2293.78	2297.12	7559.27	762.54	5742.23	10325.4	10803.4	44517	1947.39	1512.71	22989.5	7088.94	1099.23	1747.57	344.02	2816.55	2757.01	4080.75	4980.3	5797.03	11418.5	25911	247.74	363.68	1070.98	6879.8	4702.8	3151.54
2008-10-06	16803.8	1648.74	996.84	1358.75	10473.1	11801.7	2173.74	2168.32	7217.32	685.54	5505.7	9955.5	10230.4	42101	1862.96	1423.35	21749.1	6754.91	1056.89	1615.7	312.56	2585.13	2567.59	3711.98	4589.2	5387.01	10726	23776	230.11	331.54	866.39	6458.7	4544.7	3048.38
2008-10-07	16803.8	1619.72	997.23	1366.1	10155.9	11695.2	2157.84	2177.55	7181.28	715.13	5524.66	9447.11	9829.54	40140	1754.88	1384.6	20884.7	6388.38	996.23	1550.5	309.44	2468.88	2508.69	3732.22	4605.2	5326.63	10862	23622	224.13	322.1	858.16	6427.8	4597.9	3004.19
2008-10-08	15431.7	1451.67	970.19	1286.69	9203.32	11328.4	2092.22	2033.61	6924.49	715.13	5206.4	9258.1	10056.3	38594	1740.33	1359.27	20679	6306.35	984.94	1490	285.66	2253.88	2323.95	3496.89	4366.7	5013.62	10297.6	22274	209.86	302.18	761.63	6073.5	4369.8	2948.31
2008-10-09	15943.2	1451.67	968.89	1294.89	9157.49	11328.4	2074.58	2102.71	6758.22	715.13	5130.71	8579.19	9600.18	37080	1645.12	1287.33	20310.2	5809.98	909.92	1370.82	281.97	2161.36	2240.88	3442.7	4313.8	4887	9902.9	21871	208.55	310.73	844.75	5798.8	4291.3	2944.4
2008-10-10	14796.9	1451.67	934.01	1241.47	8276.43	10527.9	2000.57	1948.33	6385.35	715.13	5130.71	8451.19	9065.16	35610	1649.51	1215.99	19905.3	5809.98	899.22	1290.78	258.05	2002.05	2123.44	3176.49	3932.1	4544.31	8997.7	20309	196.74	287.74	844.75	5347.2	3939.5	2805.31
2008-10-13	16312.2	1461.87	950.76	1288.53	8276.43	11309.1	2073.57	2076.35	6571.59	715.13	5020.44	9387.61	9065.16	40829	1844.25	1215.99	22095.9	5809.98	1003.35	1462.56	285.27	2257.78	2324.8	3531.5	4256.9	5062.45	9955.7	22642	214.11	304.43	791.2	5956.3	4141.9	2782.39
2008-10-14	16832.9	1555.97	966.06	1367.69	9447.57	11483.4	2017.32	2128.31	6473.12	715.13	5291.56	9310.99	9955.66	41569	1779.01	1349.69	22244.6	6380.53	998.01	1496.85	284.51	2394.35	2213.87	3628.52	4394.2	5199.19	10224.5	23471	219.03	320.23	869.51	6260.2	4311.5	2948.97
2008-10-15	15998.3	1520.41	949.88	1340.28	9547.47	10809.1	1994.67	2059.39	6406.35	693.11	5246.26	8577.91	9323.85	36833	1628.33	1185.73	21135.4	5759.96	907.84	1395.91	263	2270.2	2082.59	3381.07	4079.6	4861.63	9706.8	22221	206.71	293.89	788.98	5911.2	4272.5	2904.64
2008-10-16	15230.5	1463.25	920.02	1213.78	8458.45	10581.5	1909.94	1951.2	6166.56	666.63	5075.97	8979.26	9269.96	36442	1717.71	1185.92	20457.9	5970.9	946.43	1418.33	248.04	2080.62	1946.38	3181	3861.4	4622.81	9308.2	20714	199.69	273.26	713.9	5718.5	3988.1	2764.69
2008-10-17	14554.2	1399.42	905.23	1180.67	8693.82	9975.35	1930.65	1878.51	6209.51	666.63	4960.4	8852.22	9562.49	36399	1711.29	1216.02	20312.8	5948.8	940.55	1421.7	252.26	2011.36	2015.3	3329.92	4063	4781.33	9655.2	21645	201.57	281.23	667.62	6099.6	3944.8	2808.76
2008-10-20	15323	1426.94	909.51	1207.63	9005.59	10223.1	1974.01	1939.22	6426.29	709.41	4931.84	9265.43	10251.4	39441	1770.03	1175.92	20786.2	6287.6	985.4	1508.65	269.41	2067.56	2109.53	3448.51	4282.7	4835.01	9944.3	22182	209.43	300.93	700.41	6216.5	4098.7	2889.92
2008-10-21	15041.2	1440.15	918.16	1196.1	9306.25	10683.4	1958.53	1920.79	6389.19	709.41	4942.72	9045.21	9795.79	39043	1696.68	1046.68	20203.3	6051.34	955.05	1414.28	269.36	2098.46	2089.35	3475.4	4229.7	4784.41	9795	21873	210.82	307.96	717.18	6185.5	4251.4	2952.02
2008-10-22	14266.6	1379.74	904.28	1134.59	8674.69	10169.9	1895.82	1821.13	6278.04	685.77	4862.59	8519.21	9236.87	35070	1615.75	940.82	18787.3	5630.47	896.78	1328.51	255.08	1973.9	1968.63	3298.18	4040.9	4571.07	8995.3	21093	203.1	293.25	665.78	5925.5	4120.1	2899.4
2008-10-23	13760.5	1337.2	891.32	1049.71	8460.98	9771.7	1875.56	1745.67	6325.31	684.68	4730.51	8691.25	9331.35	33818	1603.91	963.7	17799	5671.93	908.11	1315.97	257.85	1924.68	1983.14	3310.87	4087.8	4519.7	8811.2	21061	198.78	294.52	636.54	5893.7	3939.3	2807.34
2008-10-24	12618.4	1244.86	859.11	938.75	7649.08	8701.07	1839.62	1600.28	6158.95	662.91	4579.62	8378.95	9294.09	31482	1552.03	890.27	16978.8	5671.93	876.77	1291.74	245.92	1856.83	1918.08	3193.79	3883.4	4295.67	8353.2	19879	186.69	268.38	549.43	5675.1	3831.6	2778.55
2008-10-27	11015.8	1166.41	859.11	946.45	7162.9	8509.56	1723.35	1600.28	5734.81	644.19	4366.87	8175.77	8537.34	29435	1505.9	839.77	16891	5196.53	848.92	1284	237.1	1675.89	1854.21	3067.35	3852.6	4334.64	8009.9	19092	180.19	257.87	549.43	5500.9	3768.3	2778.55
2008-10-28	12596.3	1111.39	832.44	999.16	7621.92	9008.08	1771.82	1666.49	5891.12	629.58	4399.97	9065.12	9151.62	33387	1649.47	895.06	18632.5	5733.45	940.51	1425.66	237.96	1734.6	1898.35	3114.92	3926.4	4823.45	7905.4	18628	182.56	260.029	575.64	5538.5	3755.4	2687.1
2008-10-29	12702.1	1113.62	829.41	968.97	8211.9	9044.51	1719.81	1671.2	5798.67	643.31	4406.52	8990.96	9501.56	34845	1657.21	918.45	19157.3	5774.89	930.09	1428.14	259.579	1821.49	2022.86	3402.57	4242.5	4808.69	8650.1	20466	193.5	267.12	644	5880.6	3805.8	2745.6
2008-10-30	14329.9	1173.86	853.56	1084.72	9029.76	9044.51	1763.61	1801.91	5909.66	651.06	4683.64	9180.69	9856.2	37449	1698.52	973.56	20207	5975.03	954.09	1457.41	257.649	1909.3	2043.47	3407.82	4291.6	4869.3	8822.9	20768	202.53	283.2	758.71	5842.3	3957.3	2762.82
2008-10-31	13968.7	1256.7	863.61	1113.06	8576.98	9788.06	1728.79	1794.2	5839.33	643.31	4870.66	9325.01	9762.76	37257	1720.95	1010.79	20399.2	6061.09	968.75	1466.9	267.69	1997.9	2100.18	3487.07	4377.3	4987.97	9116	21367	201.37	294.8	773.37	6153.2	3982.7	2820.86
2008-11-01	13968.7	1256.7	863.61	1113.06	8576.98	9788.06	1728.79	1794.2	5839.33	643.31	4870.66	9325.01	9762.76	37257	1720.95	1010.79	20399.2	6061.09	968.75	1466.9	267.69	1997.9	2100.18	3487.07	4377.3	4987.97	9116	21367	201.37	294.8	802.39	6153.2	3982.7	2820.86
2008-11-03	14344.4	1352.72	899.35	1129.08	8576.98	10337.7	1719.77	1883.75	5825	676.32	4995.06	9319.83	9721.26	38249	1726.33	1057.62	20612.7	6040.31	966.3	1475.32	273.01	2045.47	2173.06	3527.97	4443.3	5026.84	9231.8	21607	210.54	305.55	802.39	6233.9	4173	2856.66
2008-11-04	14384.3	1369.79	905.58	1153.35	9114.6	10631.1	1706.7	1829.69	5668.81	704.9	4992.63	9625.28	10116.6	40255	1780.12	1123.11	21535.3	6345.09	1005.75	1527.74	291.13	2210	2233.66	3691.09	4639.5	5278.04	9726.8	23090	224.17	326.82	802.39	6400	4169.8	2844.31
2008-11-05	14840.2	1366.28	915.24	1181.5	9521.24	10120	1760.61	1868.82	5865.78	697.41	4978.26	9139.27	9887.2	37786	1681.64	1135.79	20446.8	6012.17	952.77	1452.54	279.44	2097.11	2199.43	3618.11	4530.7	5166.87	9744.7	22758	220.33	325.32	829.8	6177.1	4287.3	2886.11
2008-11-06	13790	1307.9	895.95	1092.22	8899.14	9734.22	1717.72	1819.2	5720.55	667.17	4694.12	8695.79	9555.41	36362	1608.7	1135.79	19650.9	5667.4	904.88	1388.85	260.61	2001.45	2132.87	3387.25	4272.4	4813.57	9133.9	21607	206.89	295.22	777.52	5924.9	4106.5	2840.13
2008-11-07	14243.4	1338.36	893.95	1134.49	8583	9964.29	1747.71	1863.49	5753.1	667.17	4742.33	8943.81	9596.2	36665	1647.4	1096.6	19865.2	5871.98	930.99	1425.68	265.72	2097.43	2156.59	3469.12	4365	4938.46	9343.5	21911	212.33	303.5	760.62	6008.2	4006.6	2791.65
2008-11-10	14744.6	1340.68	904.24	1152.46	9081.43	10536.2	1874.8	1885.02	6127.12	683.32	4740.27	8870.54	9688.79	36776	1616.74	1085.87	20020.5	5802.05	919.21	1428.02	267.13	2071.58	2187.89	3505.75	4403.9	5025.53	9293.8	22077	214.34	304.598	812.58	6090.6	4060	2837.85
2008-11-11	14040.9	1336.56	894.6	1128.73	8809.3	9839.69	1843.61	1806.96	6099.77	659.54	4638.57	8693.96	9424	37262	1580.9	1066.9	19795.2	5634.37	898.95	1369.81	257.13	1993.2	2133.24	3336.41	4246.7	4761.58	8911.9	20709	203.79	288.127	725.89	5880.8	3921.8	2799.56
2008-11-12	13939.1	1336.56	894.6	1128.73	8695.51	9536.33	1859.11	1806.96	6116.67	630.53	4638.57	8282.66	8922.57	34374	1499.21	1008.26	18805	5320.7	852.3	1304.53	249.25	1869.91	2057.46	3233.96	4182.02	4620.8	8646.8	20227	197.55	266.03	634.94	5702.86	3883.6	2744.05
2008-11-13	13221.4	1259.71	880.59	1063.12	8238.64	9536.33	1927.61	1755.47	6364.03	595.17	4437.83	8835.25	9352.78	35993.3	1596.7	1015.9	19710.1	5715.79	911.29	1367.61	249.96	1778.93	2062.82	3269.46	4169.21	4649.52	8740.6	20414	197.86	265.99	619.91	5740.04	3672.4	2729.62
2008-11-14	13542.7	1264.38	881.65	1088.26	8462.39	9385.42	1986.44	1759.14	6660.41	595.17	4452.7	8497.31	9055.95	35789.1	1516.85	1022.81	19562.1	5452.63	873.29	1308.05	252.47	1807.71	2061.08	3291.47	4232.97	4710.24	8832.2	20831	197.8	269.77	644.02	5834.75	3727.4	2765
2008-11-16	13542.7	1264.38	881.65	1088.26	8462.39	9385.42	1986.44	1759.14	6660.41	587.28	4452.7	8497.31	9055.95	35789.1	1516.85	1022.81	19562.1	5452.63	873.29	1308.05	252.47	1807.71	2061.08	3291.47	4232.97	4710.24	8832.2	20831	197.8	269.77	644.02	5834.75	3727.4	2765
2008-11-17	13529.5	1236.93	884.06	1078.29	8522.58	9291.01	2030.49	1749.67	6783.03	577.07	4439.8	8273.58	8795.24	35717.2	1482.05	989.06	19562.1	5323.36	850.75	1308.42	246.33	1781.83	2034.28	3182.03	4132.16	4557.27	8498.8	20081	196.36	261.74	605.56	5646.43	3639.5	2738.76
2008-11-18	12915.9	1189.86	883.09	1036.16	8328.41	8937.2	1902.43	1692.55	6293.3	584.84	4305.18	8424.75	8835.76	34094.7	1483.27	944.83	19036.2	5365.66	859.12	1306.6	250.62	1737.96	2030.96	3217.4	4208.55	4579.47	8530.8	20119	194.32	259.3	601.76	5675.58	3513.1	2715.39
2008-11-19	12815.8	1180.36	877.65	1016.82	8273.22	8773.78	2017.47	1665.59	6679.94	585.41	4284.09	7997.28	8490.56	33404.6	1386.42	925.35	18578.4	5011.99	806.58	1245.71	238.12	1646.62	1945.3	3087.89	4005.68	4354.09	8211.5	19535	184.83	241.64	605.84	5524.06	3478.5	2702.72
2008-11-20	12298.6	1154.97	865.32	948.69	7703.04	8451.01	1983.76	1613.95	6696.83	518.24	4089.93	7552.29	7724.8	33404.6	1316.12	864.4	18190.7	4651.22	752.44	1157.48	227.82	1562.47	1861.99	2980.42	3874.99	4220.2	7988.4	19124	181.76	233.01	561.14	5306.1	3337.8	2648.85
2008-11-21	12659.2	1146.28	866.88	1003.73	7910.79	8915.21	1969.39	1662.1	6711.35	518.24	4171.1	8046.42	8155.33	31250.6	1384.35	828.99	18251.4	4959.79	800.03	1203.87	222.93	1516.09	1783.7	2881.26	3780.96	4127.41	7974.4	18533	176.54	232.54	580.12	5144.02	3386.9	2577.13
2008-11-23	12659.2	1146.28	866.88	1003.73	7910.79	8915.21	1969.39	1662.1	6711.35	517.73	4171.1	8046.42	8155.33	31250.6	1384.35	828.99	18251.4	4959.79	800.03	1203.87	222.93	1516.09	1783.7	2881.26	3780.96	4127.41	7974.4	18533	176.54	232.54	580.12	5144.02	3386.9	2577.13
2008-11-24	12457.9	1141.4	855.39	970.14	7910.79	8903.12	1897.06	1620.29	6466.19	552.78	4160.54	8443.39	8440.87	34188.8	1472.02	901.91	19529.2	5313.53	851.81	1301.04	245.86	1655.27	1828.18	3172.11	4152.96	4554.33	8622.6	19899	192.45	254.67	624.91	5466.4	3388.8	2575.4
2008-11-25	12878.6	1154.14	860.18	983.32	8323.93	8695.53	1888.72	1653.25	6489	580.48	4266.49	8479.47	8442.86	34812.9	1464.73	906.39	19297.6	5375.34	857.39	1337.74	245.84	1797.86	1848.89	3209.56	4171.25	4560.42	8696.6	19778	194.66	256.23	692.51	5478.39	3551	2629.6
2008-11-26	13369.5	1187.1	856.37	1029.78	8213.22	9026.72	1897.88	1711.13	6533.87	565.44	4271.8	8726.61	8643.52	36469.6	1532.1	954.81	20025.8	5547.38	887.68	1371.43	245.16	1754.85	1809.26	3169.85	4152.69	4560.5	8654.1	19901	193.51	259.77	658.63	5498.56	3479.6	2637.76
2008-11-27	13552.1	1202.07	869.98	1063.48	8373.39	9026.72	1917.86	1711.13	6683.24	575.39	4453.75	8726.61	8753.77	36212.7	1532.1	972.03	20201.8	5547.38	887.68	1371.43	253.26	1822.31	1866.96	3250.39	4226.1	4665.27	8849.3	20152	198.28	272.62	674.14	5640.8	3528.2	2670.81
2008-11-28	13888.2	1241.54	866.14	1076.07	8512.27	9092.72	1871.16	1732.57	6658.51	575.39	4460.49	8829.04	9270.62	36595.9	1535.57	993.99	20534.7	5599.3	896.24	1364.01	252.55	1801.1	1881.46	3262.68	4288.01	4669.44	8910.6	19985	197.04	266.63	658.14	5816.6	3672.8	2685.93
2008-11-30	13888.2	1241.54	866.14	1076.07	8512.27	9092.72	1871.16	1732.57	6658.51	592.94	4460.49	8829.04	9270.62	36595.9	1535.57	993.99	20534.7	5599.3	896.24	1364.01	252.55	1801.1	1881.46	3262.68	4288.01	4669.44	8910.6	19985	197.04	266.63	658.14	5816.6	3672.8	2685.93
2008-12-01	14108.8	1223.12	848.43	1058.62	8397.22	8839.87	1894.62	1690.23	6763.97	568.07	4518.43	8149.09	8406.21	34740.5	1398.07	925.18	19533.1	5092.66	816.21	1228.63	235.5	1710.5	1785.79	3080.43	4065.49	4394.79	8510.5	18736	187.25	247.68	631.84	5527.58	3619	2687.26
2008-12-02	13405.9	1191.36	845.75	1023.2	7863.69	8739.24	1889.64	1639.18	6795.81	574.2	4356.98	8419.09	8327.81	35000.8	1449.8	951.79	19802.3	5308.95	848.81	1270.16	241.34	1736.57	1814.15	3152.9	4122.86	4531.79	8834.7	19102	194.66	251.76	618.26	5537.59	3474	2653.66
2008-12-03	13588.7	1192.53	847.53	1022.67	8004.1	8747.43	1965.41	1640.57	7041.07	564.31	4307.26	8591.69	8296.96	35296.7	1492.38	970.19	20147	5405.55	870.74	1316.53	242.04	1709.78	1848.01	3166.65	4169.96	4567.24	8879.9	19129	196.59	254.88	603.33	5604.23	3476.5	2714.09
2008-12-04	13509.8	1205.32	846.86	1006.54	7924.24	9229.75	2001.5	1643.68	7130.93	581.36	4254.96	8376.24	8057.82	35127.8	1445.56	997.74	19916.2	5232.26	845.22	1241.28	240.8	1762.97	1848.32	3161.16	4163.61	4564.23	8836.1	18911	196.55	251.08	599.96	5649.14	3468.1	2724.22
2008-12-05	13846.1	1202.34	838.28	1028.13	7917.51	8965.2	2018.66	1659.17	7279.15	581.36	4225.07	8635.42	8117.03	35347.4	1509.31	1005.34	20081.8	5401.25	876.07	1277.65	229.44	1662.34	1800.87	2988.01	4049.37	4381.47	8491.2	17968	187.78	232.29	589.79	5530.84	3427.2	2707.65
2008-12-07	13846.1	1202.34	838.28	1028.13	7917.51	8965.2	2018.66	1659.17	7279.15	599.14	4225.07	8635.42	8117.03	35347.4	1509.31	1005.34	20081.8	5401.25	876.07	1277.65	229.44	1662.34	1800.87	2988.01	4049.37	4381.47	8491.2	17968	187.78	232.29	589.79	5530.84	3427.2	2707.65
2008-12-08	15044.9	1202.34	838.28	1105.05	8329.05	9162.62	2090.77	1659.17	7528.63	621.88	4418.33	8934.18	8567.12	38284.9	1571.74	1005.34	21168.7	5639.68	909.7	1319.15	248.12	1662.34	1902.96	3247.48	4300.06	4715.88	9036.5	19314	203.47	254.64	632.21	5818.82	3557.2	2707.38
2008-12-09	14753.2	1266.12	835.17	1105.84	8395.87	9162.62	2037.74	1754.58	7360.99	624.46	4472.66	8691.33	8397.56	37968.1	1547.34	1026.63	21439.7	5522.46	888.67	1309.41	253.39	1774.18	1885.83	3297.8	4388.62	4779.11	9063.1	19620	209.64	257.04	641.92	5845.56	3533.7	2721.95
2008-12-10	15577.7	1315.9	854.66	1145.87	8660.24	9654.9	2079.12	1821.7	7490.29	627.26	4658.87	8761.42	8634	39004.4	1565.48	1060.87	21689.8	5631.07	899.24	1326.05	256.15	1795.19	1906.24	3320.31	4367.28	4804.88	9152.4	19830	211.18	259.9	656.13	5751.91	3573.3	2722.77
2008-12-11	15613.9	1316.69	860.68	1154.43	8720.55	9645.46	2031.68	1794.16	7361.49	615.24	4655.57	8565.09	8391.9	38519.1	1507.88	1089.65	21408.3	5504.73	873.59	1321.55	254.77	1761.76	1879.7	3306.13	4388.69	4767.2	9182.6	19678	207.91	266.18	670.28	5729.85	3534.2	2732.5
2008-12-12	14758.4	1262.97	852.27	1103.82	8235.87	9690.07	1954.22	1740.34	7092.71	615.24	4481.27	8629.68	8515.45	39373.9	1540.72	1098.2	21408.3	5543.96	879.73	1319.78	247.75	1700.8	1854.84	3213.6	4280.35	4663.37	8975.5	19174	202.87	251.19	652.21	5636.17	3452.5	2684.15
2008-12-14	14758.4	1262.97	852.27	1103.82	8235.87	9690.07	1954.22	1740.34	7092.71	592.15	4481.27	8629.68	8515.45	39373.9	1540.72	1098.2	21408.3	5543.96	879.73	1319.78	247.75	1700.8	1854.84	3213.6	4280.35	4663.37	8975.5	19174	202.87	251.19	652.21	5636.17	3452.5	2684.15
2008-12-15	15047	1359.28	846.47	1158.19	8664.66	9832.39	1964.37	1774.76	7101.42	577.35	4613.72	8564.53	8461.83	38320.2	1508.34	1115.04	21050.5	5497.9	868.57	1319.09	247.11	1737.56	1854.84	3185.66	4277.56	4654.82	9023.9	19057	200.54	259.49	689.17	5526.54	3535.7	2683.8
2008-12-16	15130.2	1342.84	854.8	1161.56	8568.02	9976.98	1975.01	1782.09	7250.32	592.1	4616.89	8924.14	8724.11	39993.5	1589.89	1143.33	22032.5	5804.97	913.18	1390.64	248.26	1742.84	1854.84	3251.66	4309.08	4729.91	9167.7	19301	204.85	261.55	687.94	5567.14	3496.3	2695.84
2008-12-17	15460.5	1363.98	862.5	1169.75	8612.52	9715.29	1976.82	1779.29	7286.87	597.49	4648.02	8824.34	8724.11	39947.4	1579.31	1147.97	22572.5	5769.8	904.42	1358.64	247.76	1732.61	1859.62	3241.92	4324.19	4708.38	9196.9	19352	203.99	266.37	699.86	5548.2	3515	2702.48
2008-12-18	15497.8	1351.76	880.5	1175.91	8667.23	10076.4	2015.69	1798.95	7412.47	602.65	4694.81	8604.99	8425.35	39536.3	1552.37	1116.43	22347.2	5618.04	885.28	1352.43	249.88	1716.09	1881.85	3234.15	4330.66	4756.4	9257.8	19557	206.48	264.71	668.31	5515.05	3515.9	2708.88
2008-12-19	15127.5	1348.28	876.4	1180.97	8588.52	10099.9	2018.46	1795.47	7438.83	602.65	4694.52	8579.11	8552.5	39131.2	1564.32	1095.93	22221.6	5616.12	887.88	1340.91	249.54	1638.78	1861.45	3225.9	4286.93	4696.7	9268.4	19683	203.86	263.32	634.22	5459.86	3547.2	2679.42
2008-12-21	15127.5	1348.28	876.4	1180.97	8588.52	10099.9	2018.46	1795.47	7438.83	588.04	4694.52	8579.11	8552.5	39131.2	1564.32	1095.93	22221.6	5616.12	887.88	1340.91	249.54	1638.78	1861.45	3225.9	4286.93	4696.7	9268.4	19683	203.86	263.32	634.22	5459.86	3547.2	2679.42
2008-12-22	14622.4	1345.31	873.43	1179.28	8688.63	9928.35	1987.76	1745.63	7295.12	578.43	4535.54	8519.69	8249.53	37618.5	1532.35	1045.56	22059.2	5520.81	871.63	1329.1	243.44	1699.89	1845.08	3151.36	4249.16	4639.02	9098.9	19222	201.08	256.85	657.15	5419.52	3492.3	2672.53
2008-12-23	14220.8	1343.72	871.16	1144.31	8688.63	9686.75	1897.23	1724.54	6952.91	564.54	4405.86	8419.49	8311.91	36470.8	1521.54	1038.31	22174.3	5468.28	863.16	1339.37	244.5	1725.89	1863.39	3128.41	4255.98	4629.38	9068.5	19142	201.86	258.52	682.37	5399.58	3454	2660.66
2008-12-24	14184.1	1336.61	869.62	1128.51	8517.1	9568.72	1863.8	1736.99	6845.6	550.49	4423.09	8468.48	8310.55	36470.8	1524.9	1038.31	22340.7	5487.33	868.15	1330.19	241.9	1725.89	1846.63	3116.21	4216.59	4629.38	9068.5	19142	201.86	258.52	667.71	5399.58	3515	2668.06
2008-12-25	14184.1	1336.61	869.62	1128.51	8599.5	9568.72	1852.42	1736.99	6785.04	552.36	4413.45	8468.48	8310.55	36470.8	1524.9	1038.31	22340.7	5487.33	868.15	1330.19	241.9	1725.89	1846.63	3116.21	4216.59	4629.38	9068.5	19142	201.86	258.52	655.91	5399.58	3515	2658.85
2008-12-26	14184.1	1340.89	867.35	1117.86	8739.52	9328.92	1851.52	1725.61	6704.25	552.36	4425.08	8515.55	8310.55	36864.1	1530.24	1058.57	22515.3	5538.19	872.8	1346.9	241.9	1725.89	1846.63	3116.21	4216.59	4629.38	9068.5	19142	201.86	258.52	644.47	5399.58	3515	2658.85
2008-12-28	14184.1	1340.89	867.35	1117.86	8739.52	9328.92	1851.52	1725.61	6704.25	541.7	4425.08	8515.55	8310.55	36864.1	1530.24	1058.57	22515.3	5538.19	872.8	1346.9	241.9	1725.89	1846.63	3116.21	4216.59	4629.38	9068.5	19142	201.86	258.52	644.47	5399.58	3515	2658.85
2008-12-29	14328.5	1340.89	867.35	1117.59	8747.17	9533.52	1850.48	1780.57	6653.2	547.14	4416.16	8483.93	8637.29	37060.2	1510.32	1076.41	22392.4	5534.64	869.42	1353.95	240.81	1751.53	1883.17	3130.72	4319.35	4704.86	9017.7	19167	201.81	264.96	642.83	5464.96	3545.1	2678.03
2008-12-30	14235.5	1355.41	881.63	1124.47	8859.56	9716.16	1832.91	1770.65	6558.16	553.86	4589.04	8668.39	8830.72	37550.3	1550.7	1079.66	22420	5670	890.64	1373.27	246.58	1750.83	1907.12	3217.13	4392.68	4810.2	9195.8	19460	204.22	270.21	625.42	5534.53	3591.5	2680.9
2008-12-31	14387.5	1355.41	876.75	1124.47	8859.56	9647.31	1820.81	1761.56	6485.51	564.09	4591.22	8776.39	8987.7	37550.3	1577.03	1079.66	22380.3	5757.05	903.25	1397.53	245.94	1750.83	1908.64	3217.97	4434.17	4810.2	9195.8	19460	204.22	270.21	631.89	5534.53	3659.3	2715.71
2009-01-01	14387.5	1355.41	876.75	1124.47	8859.56	9903.46	1820.81	1761.56	6485.51	584.81	4591.22	8776.39	8987.7	37550.3	1577.03	1079.66	22380.3	5757.05	903.25	1397.53	245.94	1750.83	1908.64	3217.97	4434.17	4810.2	9195.8	19460	204.22	270.21	631.89	5534.53	3659.3	2715.71
2009-01-02	15042.8	1355.41	894.36	1157.4	8859.56	9958.22	1820.81	1799.72	6485.51	584.81	4591.22	9034.69	9234.11	40244.2	1632.21	1143.33	23251	5915.73	931.8	1444.29	258.23	1812.54	1980.77	3349.69	4561.79	4973.07	9486.3	19953	214.01	285.18	631.89	5534.53	3644.3	2715.71
2009-01-04	15042.8	1355.41	894.36	1157.4	8859.56	9958.22	1820.81	1799.72	6485.51	590.67	4591.22	9034.69	9234.11	40244.2	1632.21	1143.33	23251	5915.73	931.8	1444.29	258.23	1812.54	1980.77	3349.69	4561.79	4973.07	9486.3	19953	214.01	285.18	631.89	5534.53	3644.3	2715.71
2009-01-05	15563.3	1437.34	920.66	1173.57	9043.12	10275.6	1880.72	1924.87	6634.88	594.2	4698.31	8952.89	9285.51	41518.7	1628.03	1151.8	23238.9	5908.43	927.45	1461.22	261.78	1829.44	2004.32	3359.92	4579.64	4983.99	9644.1	20262	214.63	292.13	631.89	5756.09	3638.9	2740.68
2009-01-06	15509.5	1435.54	922.23	1194.28	9080.84	10335.9	1937.15	1913.66	6795.34	618.24	4727.26	9015.1	9472.09	42312.3	1652.38	1214.28	23005.4	5968.84	934.7	1473.89	269.27	1829.44	1997.28	3396.22	4638.92	5026.31	9724	20729	214.63	301.41	631.89	5799.31	3689.2	2776.55
2009-01-07	14987.5	1421.47	927.62	1228.17	9239.24	9586.88	1924.01	1880.58	6725.82	610.65	4789.84	8769.7	9121.34	40820.2	1599.06	1167.06	22117.5	5799.05	906.65	1421.46	265.04	1899.38	1997.91	3346.09	4507.51	4937.47	9570	20606	216.56	285.28	631.89	5761.69	3728.2	2768.89
2009-01-08	14415.9	1402.66	910.52	1205.7	8876.42	9586.88	1878.18	1827.61	6616.98	594.88	4535.79	8742.46	9221.58	41990.6	1617.01	1192.44	21955.4	5837.14	909.73	1466.62	264.59	1869.52	1976.57	3324.33	4505.37	4879.91	9469.5	20630	214.69	286.98	631.89	5751.07	3643.6	2757.58
2009-01-09	14377.4	1416.67	919.07	1180.96	8836.8	9406.47	1904.86	1806.02	6719.88	594.88	4502.74	8599.18	9085.18	41582.9	1571.59	1179.55	21741.3	5703.69	890.35	1467.46	266.18	1815.25	1973.95	3299.5	4448.54	4783.89	9378.5	20093	212.28	285.28	631.89	5697.24	3680.4	2755.35
2009-01-10	14377.4	1416.67	919.07	1180.96	8836.8	9406.47	1904.86	1806.02	6719.88	594.88	4467.53	8599.18	9085.18	41582.9	1571.59	1179.55	21741.3	5703.69	890.35	1467.46	266.18	1815.25	1973.95	3299.5	4448.54	4783.89	9378.5	20093	212.28	285.28	631.89	5697.24	3680.4	2755.35
2009-01-11	14377.4	1416.67	919.07	1180.96	8836.8	9406.47	1904.86	1806.02	6719.88	611.24	4467.53	8599.18	9085.18	41582.9	1571.59	1179.55	21741.3	5703.69	890.35	1467.46	266.18	1815.25	1973.95	3299.5	4448.54	4783.89	9378.5	20093	212.28	285.28	626.85	5697.24	3680.4	2755.35
2009-01-12	13971	1406.55	923.57	1156.75	8836.8	9110.05	1900.35	1776.25	6719.91	606.91	4453.9	8473.97	8793.33	39403.5	1538.79	1128.17	21162.3	5551.04	870.26	1420.94	261.8	1789.65	1970.54	3246.12	4426.19	4719.62	9199.9	19911	207.62	277.12	629.49	5591.79	3624	2771.44
2009-01-13	13668	1399.73	913.7	1167.71	8413.91	9071.36	1863.37	1761.82	6530.81	604.07	4532.36	8448.56	8961.55	39544.2	1546.46	1131.96	21047.3	5538.84	871.79	1405	260.74	1751.26	1963.02	3197.89	4399.15	4636.94	9057.3	19455	204.2	275.89	621	5534.33	3593.9	2775.51
2009-01-14	13704.6	1386.91	913.46	1182.68	8438.45	9370.49	1928.87	1764.72	6811.87	584.64	4521.47	8200.14	8688.36	37981.8	1489.64	1087.61	20369.2	5328.68	842.62	1338.76	247.32	1676.49	1890.27	3052	4180.64	4422.35	8692.7	18763	194.7	265.98	591.34	5378.81	3624.3	2784.98
2009-01-15	13243	1343.49	897.45	1111.35	8018.59	9030.52	1920.21	1704.34	6798.53	590.43	4320.77	8212.49	8879.61	39142.8	1511.84	1100.26	20280.5	5347.75	843.74	1350.57	243.6	1694.82	1890.27	2995.88	4180.64	4336.73	8611.1	18402	193.57	265.36	591.34	5378.81	3481	2748.59
2009-01-16	13255.5	1363.88	896.47	1135.21	8230.15	9323.59	1954.44	1730.45	6917.48	590.43	4353.7	8281.22	8920.4	39341.5	1529.33	1097.96	20325.4	5387.5	850.12	1383.24	248.55	1732.94	1851.65	3016.75	4147.06	4366.28	8620.1	18703	195.78	280.21	566.77	5435.54	3493.2	2753.44
2009-01-17	13255.5	1363.88	896.47	1135.21	8230.15	9323.59	1954.44	1730.45	6917.48	590.43	4366.1	8281.22	8920.4	39341.5	1529.33	1097.96	20325.4	5387.5	850.12	1383.24	248.55	1732.94	1851.65	3016.75	4147.06	4366.28	8620.1	18703	195.78	280.21	566.77	5435.54	3493.2	2753.44
2009-01-18	13255.5	1363.88	896.47	1135.21	8230.15	9323.59	1954.44	1730.45	6917.48	609.68	4366.1	8281.22	8920.4	39341.5	1529.33	1097.96	20325.4	5387.5	850.12	1383.24	248.55	1732.94	1851.65	3016.75	4147.06	4366.28	8620.1	18703	195.78	280.21	566.77	5435.54	3493.2	2753.44
2009-01-19	13340	1350.69	890.28	1150.65	8256.85	9329.57	1986.67	1746.99	6982.59	600.28	4366.76	8281.22	8841.48	38828.3	1529.33	1108.45	20393.4	5387.5	850.12	1383.24	245.22	1642.68	1839.94	2989.69	4108.47	4316.14	8494.8	18367	193.26	272.65	531.66	5381.37	3531	2750.59
2009-01-20	12959.8	1344.15	880.37	1126.81	8065.79	9100.55	1994.11	1721.66	7020.51	600.67	4242.61	7949.09	8504.93	37272.1	1440.86	1044.64	19213	5058.06	805.22	1329.67	240.11	1623.5	1802.74	2925.28	4091.4	4239.85	8276.5	18024	186.4	269.26	514.29	5321	3423.2	2707.38
2009-01-21	12583.6	1321.45	873.41	1103.61	7901.64	8779.17	1985.02	1704.52	6970.81	582.95	4247.97	8228.1	8757.89	38542.9	1507.07	1062.68	19497.1	5273.99	840.24	1357.4	237.71	1612.69	1794.97	2905.57	4059.88	4261.15	8230.7	17684	190.88	271.28	530.09	5304.17	3399.5	2703.12
2009-01-22	12658	1327.32	879.02	1116.23	8051.74	8813.84	2004.95	1708.77	7050.88	572.8	4247.97	8122.8	8486.56	37894.3	1465.49	1057.82	19306.7	5171.68	827.5	1339.3	235.46	1591.88	1805.38	2869.62	4052.23	4219.42	8159.3	17369	189.42	267.96	515.51	5329.44	3431.9	2737.01
2009-01-23	12578.6	1315.58	872.69	1093.4	7745.25	8674.35	1990.66	1685.23	7015.24	572.8	4247.97	8077.56	8627.97	38132.3	1477.29	1066.51	19348.8	5195.55	831.95	1361.92	234.14	1563.08	1834.19	2849.14	4052.47	4178.94	8172.8	17283	187.93	271.32	498.2	5306.91	3310.4	2706.7
2009-01-25	12578.6	1315.58	872.69	1093.4	7745.25	8674.35	1990.66	1685.23	7015.24	578.86	4247.97	8077.56	8627.97	38132.3	1477.29	1066.51	19348.8	5195.55	831.95	1361.92	234.14	1563.08	1834.19	2849.14	4052.47	4178.94	8172.8	17283	187.93	271.32	498.2	5306.91	3310.4	2706.7
2009-01-26	12578.6	1315.58	872.69	1093.4	7682.14	8674.35	1990.66	1685.23	7015.24	589.94	4247.97	8116.03	8656.51	38509.4	1489.46	1067.6	19583.1	5244.61	836.57	1388.37	247.88	1633.14	1884.03	2955.37	4209.01	4326.87	8375.2	17797	193.64	278.28	539.38	5417.07	3310.4	2708.3
2009-01-27	12578.6	1336.63	872.69	1093.4	8061.07	9004.08	1990.66	1685.23	7015.24	589.03	4247.97	8174.73	8759.63	38698.9	1504.9	1079.38	19616.2	5315.44	845.71	1399.56	248.59	1640.37	1870.39	2954.53	4194.41	4323.42	8349.5	17739	193.91	277.87	547.04	5417.07	3392.5	2735.64
2009-01-28	12578.6	1321.45	879.63	1157.98	8106.29	9257.47	1990.66	1766.08	7015.24	607.74	4247.97	8375.45	8906.23	40227.4	1558.34	1105.45	20145.2	5501.46	874.09	1420.92	257.16	1713.51	1870.39	3076.01	4295.2	4518.72	8701.5	18341	198.58	282.67	546.39	5417.93	3435.1	2748.69
2009-01-29	13154.4	1324.65	883.16	1166.56	8251.24	9236.28	1990.66	1766.72	7015.24	599.97	4247.97	8149.01	8762.76	39638.4	1507.84	1088.53	19537	5300.9	845.14	1405.72	252.35	1703.19	1893.94	3009.75	4190.11	4428.11	8477.4	18092	192.16	275.13	530.7	5272.9	3461.3	2766.3
2009-01-30	13278.2	1332.67	884.45	1162.11	7994.05	9424.24	1990.66	1746.47	7015.24	599.97	4247.97	8000.86	8694.9	39300.8	1476.42	1077.09	19565.1	5195.79	825.88	1420.43	248.6	1736.23	1900.09	2973.92	4149.64	4338.35	8450.4	17934	192.27	274.22	535.04	5290.05	3479.1	2770.46
2009-02-01	13278.2	1332.67	884.45	1162.11	7994.05	9424.24	1990.66	1746.47	7015.24	597.67	4247.97	8000.86	8694.9	39300.8	1476.42	1077.09	19565.1	5195.79	825.88	1420.43	248.6	1736.23	1900.09	2973.92	4149.64	4338.35	8450.4	17934	192.27	274.22	535.04	5290.05	3479.1	2770.46
2009-02-02	12861.5	1310.64	884.45	1147.57	7873.98	9066.7	2011.68	1705.29	7087.61	594.06	4259.98	7936.83	8624.83	38666.4	1494.43	1057.82	19565.1	5166.45	825.44	1397.59	245.96	1672.48	1858.77	2930.05	4077.78	4271.04	8233.4	17467	187.8	264.14	508.25	5166.96	3442.4	2771.76
2009-02-03	12776.9	1304.33	879.67	1163.2	7825.51	9149.3	2060.81	1711.92	7266.41	604.53	4372.81	8078.36	8628.63	39746.8	1516.3	1072.34	19630.5	5268.02	838.51	1424.79	250.83	1689.77	1883.81	2982.39	4164.46	4374.96	8361.9	17669	192.76	269.42	512.34	5217.61	3449.1	2779.5
2009-02-04	13063.9	1320.36	876.8	1195.37	8038.94	9201.85	2107.75	1707.39	7477.63	618.34	4389.97	7956.66	8693.09	40129	1515.05	1079.04	19622.6	5242.75	832.23	1404.25	254.79	1737.99	1906.49	3068.99	4228.6	4492.79	8495.4	18015	199.09	273.41	514.89	5225.46	3384.2	2765.91
2009-02-05	13178.9	1328.08	879.95	1177.88	7950.03	9090.88	2098.02	1704.6	7413.42	623.38	4363.25	8063.07	8860.98	41108.7	1546.24	1110.72	19737	5326.01	845.85	1426.5	252.51	1691.38	1907.22	3066.29	4228.93	4510.49	8440.2	18013	198.35	270.26	513.12	5106.85	3372.6	2765.56
2009-02-06	13655	1350.64	896.64	1210.26	8076.62	9300.86	2181.24	1715.35	7771.9	623.38	4471.25	8280.59	9008.02	42755.5	1591.71	1143.82	20438.1	5475.28	868.6	1437.87	261.35	1733.95	1916.88	3122.79	4291.87	4644.63	8544.7	18434	206.76	279.02	520.91	5123.09	3408.3	2758.07
2009-02-08	13655	1350.64	896.64	1210.26	8076.62	9300.86	2181.24	1715.35	7771.9	644.56	4471.25	8280.59	9008.02	42755.5	1591.71	1143.82	20438.1	5475.28	868.6	1437.87	261.35	1733.95	1916.88	3122.79	4291.87	4644.63	8544.7	18434	206.76	279.02	520.91	5123.09	3408.3	2758.07
2009-02-09	13769.1	1342.23	896.64	1202.69	7969.03	9583.89	2224.71	1682.34	8087.69	644.22	4494.59	8270.87	9047.28	42100.1	1591.56	1135.96	20537.1	5479.88	869.89	1457.26	262.72	1746.15	1927.25	3134.87	4307.61	4666.82	8584.8	18663	212.38	287.56	569.14	5158.5	3444	2768.38
2009-02-10	13880.6	1332.13	903.52	1198.87	7945.94	9647.47	2265.16	1703.29	8265.56	644.22	4526.1	7888.88	8817.89	41207.4	1524.73	1105.11	19825.7	5214.71	827.16	1402.69	251.37	1725.91	1884.26	3020.75	4213.08	4505.54	8397.3	18252	208.6	283.96	602.86	5144.69	3428.6	2747.11
2009-02-11	13539.2	1324.82	897.07	1190.18	7945.94	9618.54	2260.82	1721.97	8289.21	627.52	4575.95	7939.53	8737.89	40845.6	1530.5	1107.98	19446.7	5252.68	833.74	1403.19	253.28	1712.39	1884.02	3027.72	4234.26	4530.09	8355.8	18074	208.89	284.46	620.58	5123.77	3418.1	2732.84
2009-02-12	13228.3	1325.42	894.6	1179.84	7705.36	9465.83	2248.09	1684.96	8318.8	625.6	4466.42	7932.76	8778.78	40500.8	1541.71	1084.76	19358.2	5256.45	835.19	1405.69	248.27	1666.04	1843	2964.34	4202.24	4407.56	8200.9	17669	207.79	277.21	611.45	5106.67	3458.5	2748.72
2009-02-13	13554.7	1338.74	909.84	1192.44	7779.4	9634.74	2320.79	1705.64	8628.75	625.6	4592.5	7850.41	8678.1	41673.6	1534.36	1134.89	19368.1	5206.76	826.84	1401.23	251.12	1684.58	1832.24	2997.86	4189.59	4413.39	8265.5	17731	209.5	282.25	624.21	5126.84	3496.7	2752.85
2009-02-15	13554.7	1338.74	909.84	1192.44	7779.4	9634.74	2320.79	1705.64	8628.75	625.74	4592.5	7850.41	8678.1	41673.6	1534.36	1134.89	19368.1	5206.76	826.84	1401.23	251.12	1684.58	1832.24	2997.86	4189.59	4413.39	8265.5	17731	209.5	282.25	624.21	5126.84	3496.7	2752.85
2009-02-16	13455.9	1342	907.19	1175.47	7748.4	9305.45	2389.39	1683.31	8771.04	629.13	4591.26	7850.41	8678.1	41159.1	1534.36	1123.82	19520.9	5206.76	826.84	1401.23	247.15	1619.62	1823.78	2962.22	4134.75	4366.64	8075	17410	210.45	277.03	609.31	5077.62	3456.7	2685.24
2009-02-17	12945.4	1318.04	898.53	1127.19	7645.51	9035	2319.44	1637.92	8461.16	620.35	4491.78	7552.6	8378.7	40022.5	1470.66	1072.94	18853.9	4939.11	789.17	1364.46	238.17	1480.05	1783.23	2875.23	4034.13	4216.6	7843.2	16726	201.03	270.27	552.03	4941.31	3412.2	2667.05
2009-02-18	13016	1330.61	895.23	1113.19	7534.44	9015.18	2209.86	1651.06	8083.5	629.82	4498.37	7555.63	8175.95	39480.8	1467.97	1054.9	18741.3	4924.54	788.42	1341.99	238.3	1481.37	1756.19	2874.07	4006.83	4204.96	7861.4	16580	202.12	266.39	524.26	4955.47	3363.4	2618.3
2009-02-19	13023.4	1323.7	899.59	1107.15	7557.65	9042.63	2227.13	1629.35	8213.9	626.96	4528.87	7465.95	8185.35	39738.3	1442.82	1065.67	18682.5	4881.16	778.94	1351.53	237.67	1512.94	1783.2	2872.6	4018.37	4215.21	7875.9	16501	204.22	267.65	549.21	4990.52	3398	2618.88
2009-02-20	12699.2	1296.94	889.71	1065.95	7416.38	8843.21	2261.48	1597.67	8423.77	626.96	4436.94	7365.67	7949.99	38958.3	1441.23	1048.63	18324.2	4804.51	770.05	1333.49	229.13	1465.39	1740.36	2750.55	3889.06	4014.66	7603.6	15530	196.8	254.1	517.22	4851.21	3353	2567.06
2009-02-22	12699.2	1296.94	889.71	1065.95	7416.38	8843.21	2261.48	1597.67	8423.77	602.61	4436.94	7365.67	7949.99	38958.3	1441.23	1048.63	18324.2	4804.51	770.05	1333.49	229.13	1465.39	1740.36	2750.55	3889.06	4014.66	7603.6	15530	196.8	254.1	517.22	4851.21	3353	2567.06
2009-02-23	13175.1	1312.44	887.83	1099.55	7379.05	8843.21	2305.78	1630.69	8727.7	603.03	4477.78	7114.78	7647.67	38958.3	1387.72	1009.51	17956.4	4633.78	743.33	1293.33	223.98	1463.46	1725.58	2727.87	3850.73	3936.45	7540.4	15391	191.95	251.84	517.22	4797.12	3304.6	2538.58
2009-02-24	12798.5	1295.87	894.07	1063.88	7268.56	8822.06	2200.65	1614.44	8403.02	591.86	4430.18	7350.94	7859.33	38958.3	1441.83	1041.16	18296.1	4821.73	773.14	1319.05	222.55	1428.54	1697.6	2708.05	3816.44	3895.75	7483.4	15436	191.19	251.79	524.69	4723.02	3285	2483.74
2009-02-25	13005.1	1300.11	896.51	1067.08	7461.22	8902.56	2206.57	1616.79	8241.66	597.16	4493.74	7270.89	7932.3	38352.7	1425.43	1019.11	18200.7	4753.17	764.9	1311.96	220.69	1450.86	1681.13	2696.92	3848.98	3846.21	7512.1	15218	191.11	254.12	538.11	4702.5	3281.5	2501.18
2009-02-26	12894.9	1290.32	893.42	1054.79	7457.93	8954.86	2121.25	1617.44	7777.9	603.69	4518.56	7182.08	8186.82	38180.2	1391.47	1017.87	18047.2	4713.02	752.83	1329.38	223.67	1482.71	1688.15	2744.84	3915.64	3942.62	7811.7	15664	198.4	264.03	547.63	4770.78	3299.2	2502.05
2009-02-27	12811.6	1285.48	890.67	1065.73	7568.42	8891.61	2082.85	1594.87	7608.22	603.69	4557.15	7062.93	8123.02	38183.3	1377.84	1019.29	17752.2	4617.03	735.09	1332.42	219.81	1481.67	1696.58	2702.48	3830.09	3843.74	7620.9	15282	197.55	259.06	544.58	4690.67	3282.4	2506.55
2009-03-01	12811.6	1285.48	890.67	1065.73	7568.42	8891.61	2082.85	1594.87	7608.22	579.89	4557.15	7062.93	8123.02	38183.3	1377.84	1019.29	17752.2	4617.03	735.09	1332.42	219.81	1481.67	1696.58	2702.48	3830.09	3843.74	7620.9	15282	197.55	259.06	544.58	4690.67	3282.4	2506.55
2009-03-02	12317.5	1256.11	876.56	1018.81	7280.15	8607.08	2093.45	1533.4	7762.72	579.11	4425.83	6763.29	7687.1	36234.7	1322.85	943.75	16929.8	4360.98	700.82	1260.75	208.84	1417.46	1610.56	2581.46	3625.83	3710.07	7270.5	14362	190.71	249.2	539.37	4438.27	3200.5	2479.23
2009-03-03	12033.9	1264.82	868.74	1025.57	7229.72	8427.29	2071.43	1528.51	7695.62	581.14	4435.34	6726.02	7631.62	36467.6	1321.01	930.12	17093.2	4334.7	696.33	1249.31	202.57	1425.29	1566.27	2554.55	3512.09	3690.72	7219.4	14017	186.58	239.48	540.74	4358	3171.4	2417.37
2009-03-04	12331.1	1289.38	866.93	1059.26	7290.96	8446.49	2198.11	1544.34	8227.69	594.66	4541.42	6875.84	7814.75	38402.2	1353.74	986.27	17825	4464.89	712.87	1280.87	211.58	1502.98	1584.19	2675.68	3645.87	3890.94	7357.5	14363	194.29	254.4	562.87	4463.67	3125.9	2467.41
2009-03-05	12211.2	1288.07	869.24	1058.18	7433.49	8197.92	2221.08	1518.64	8242.28	577.91	4637.2	6594.44	7629.17	37368.9	1299.59	954.81	17365	4267.6	682.55	1262.01	200.58	1446.07	1552.18	2569.63	3529.86	3695.49	7025.9	13523	187.69	243.98	559.09	4390.18	3147.1	2490.89
2009-03-06	11921.5	1286.69	858.22	1055.03	7173.1	8325.82	2193.01	1513.12	8249.89	577.91	4653.63	6626.94	7591.47	37105.1	1293.85	965.02	17043.4	4284.48	683.38	1267.84	199.5	1419.03	1527.27	2534.45	3530.73	3666.41	6936.9	12895	186.64	244.2	576.39	4311.61	3111.7	2467.7
2009-03-08	11921.5	1286.69	858.22	1055.03	7173.1	8325.82	2193.01	1513.12	8249.89	575.69	4653.63	6626.94	7591.47	37105.1	1293.85	965.02	17043.4	4284.48	683.38	1267.84	199.5	1419.03	1527.27	2534.45	3530.73	3666.41	6936.9	12895	186.64	244.2	576.39	4311.61	3111.7	2467.7
2009-03-09	11344.6	1286.69	858.22	1071.73	7086.03	8160.4	2118.75	1483.49	7946.8	576.11	4628.24	6547.05	7566.94	36741.3	1268.64	952.64	16964.4	4226.31	676.53	1246.46	199.25	1411.95	1553.05	2519.29	3542.4	3692.03	6817.4	12621	188.13	249.52	576.39	4307.67	3121.7	2464.98
2009-03-10	11694	1300.22	855.25	1092.2	7054.98	8160.4	2158.57	1485.75	8045.66	576.11	4671.02	6926.49	7880.41	38794.6	1358.28	1004.18	17543.5	4499.37	719.6	1295.94	210.44	1456.1	1616.51	2663.68	3715.23	3886.98	7153.3	13503	198.3	258.83	634.92	4512.55	3143.2	2460.71
2009-03-11	11930.7	1314.52	850.37	1127.51	7376.12	8160.4	2139.03	1505.51	7941.51	590.37	4759.96	6930.4	8011.02	38804.8	1371.64	1004.33	17790.7	4505.38	721.36	1265.68	210.33	1450.07	1647.25	2674.2	3693.81	3914.1	7204.7	13568	202.63	254.26	627.6	4576.97	3199.1	2502.21
2009-03-12	12001.5	1310.41	838.39	1128.39	7198.25	8343.75	2133.88	1493.53	7933.51	587.49	4754.65	7170.06	8313.26	39151.9	1426.1	1025.39	18864.9	4684.99	750.74	1306.23	211.31	1467.26	1671.04	2694.25	3712.06	3956.22	7340.5	13921	203.14	252.24	618.93	4645.78	3190.4	2494.6
2009-03-13	12525.8	1327.44	843.45	1126.03	7569.28	8756.61	2128.85	1577.52	7875.74	587.49	4897.39	7223.98	8303.39	39015.4	1431.5	1043.33	19437	4721	756.55	1299.97	211.74	1491.7	1661.76	2705.63	3753.68	3953.6	7427.8	13804	201.47	253.8	652.53	4726.74	3294.7	2521.87
2009-03-15	12525.8	1327.44	843.45	1126.03	7569.28	8756.61	2128.85	1577.52	7875.74	607.73	4897.39	7223.98	8303.39	39015.4	1431.5	1043.33	19437	4721	756.55	1299.97	211.74	1491.7	1661.76	2705.63	3753.68	3953.6	7427.8	13804	201.47	253.8	652.53	4726.74	3294.7	2521.87
2009-03-16	12976.7	1324.63	840.88	1125.46	7704.15	8943.54	2153.29	1586.32	8022.69	607.91	4971.32	7216.97	8386.71	38607.2	1404.02	1033.79	19437	4728.91	753.89	1303.12	215.79	1542.59	1707.74	2791.66	3863.99	4044.54	7636.9	14158	206.28	257.1	647.55	4816.43	3290	2532.16
2009-03-17	12878.1	1312.09	841.87	1163.88	7949.13	8863.82	2218.33	1559.03	8389.87	607.88	5041.39	7395.7	8559.6	39510.7	1462.11	1051.79	19325	4868.14	778.12	1316.68	210.87	1544.92	1700.97	2767.28	3857.1	3987.77	7645.3	14082	203.23	257.78	665.58	4813.78	3393.4	2558.89
2009-03-18	13117.2	1322.84	847.96	1169.95	7972.17	8976.68	2223.73	1575.94	8465.96	607.21	5047.54	7486.58	8629.1	40142.3	1491.22	1065.56	19620.5	4975.3	794.35	1327.73	209.34	1557.6	1698.43	2760.34	3804.99	3996.32	7661.6	14473	202.55	252.74	650.62	4783.32	3378.3	2606.85
2009-03-19	13130.9	1341.6	852.18	1161.81	7945.96	9001.75	2265.76	1584.86	8622.47	609.62	5035.93	7400.8	8690.49	40453.4	1483.48	1078.77	19596.5	4937.22	784.04	1335.74	210.38	1611.37	1689.64	2776.99	3816.93	4043.46	7701.6	14749	206.99	263.38	694.69	4794.63	3416.8	2631.3
2009-03-20	12833.5	1360.89	856.82	1170.94	7945.96	8966.68	2281.09	1596.92	8647.51	609.62	4961.62	7278.38	8506.35	40076.4	1457.27	1069.53	19363.3	4832.13	768.54	1321.96	212.71	1627.43	1708.66	2791.14	3842.85	4068.74	7710	14948	202.44	265.91	696.93	4787.17	3407.2	2602.54
2009-03-22	12833.5	1360.89	856.82	1170.94	7945.96	8966.68	2281.09	1596.92	8647.51	617.08	4961.62	7278.38	8506.35	40076.4	1457.27	1069.53	19363.3	4832.13	768.54	1321.96	212.71	1627.43	1708.66	2791.14	3842.85	4068.74	7710	14948	202.44	265.91	696.93	4787.17	3407.2	2602.54
2009-03-23	13447.4	1404.04	878.3	1199.5	8215.53	9424.02	2325.48	1664.08	8885.75	631.49	5124.18	7775.86	8958.51	42438.6	1555.77	1124.56	20346.4	5185.86	822.92	1372.22	220.9	1688.54	1754.02	2856.9	3953.4	4176.37	7952.3	15811	203.29	273.73	737.19	4897.5	3477.7	2597.3
2009-03-24	13910.3	1436.12	877.92	1221.7	8488.3	9471.04	2338.42	1706.34	8954.84	632.69	5242.18	7660.21	8849.39	41475.8	1518.31	1124.56	20242.6	5064.33	806.12	1362.81	221.47	1634.98	1749.29	2874.39	3911.46	4187.36	7989.5	15837	200.28	270.95	721.64	4923.66	3516.4	2640.44
2009-03-25	13622.1	1419.97	878.81	1229.02	8479.99	9667.9	2291.56	1691.68	8756.25	654.4	5346.38	7749.81	8797.44	41799.3	1528.95	1132.32	20272.8	5127	813.88	1374.74	225.55	1700.52	1756.96	2893.45	3900.25	4223.29	8072.4	16263	203.42	276.6	740.94	4970.38	3550.1	2629.74
2009-03-26	14109	1419.97	885.47	1243.8	8521.66	10003.1	2361.7	1758.79	8983.87	674.68	5386.56	7924.56	8995.5	42588.7	1587	1171.43	20542.2	5230.53	832.86	1380.05	224.8	1730.83	1783.16	2892.07	3925.2	4259.37	8076.2	16483	204.11	282.04	752.63	4966.74	3587.7	2614.81
2009-03-27	14119.5	1462.74	885.43	1237.51	8626.97	10048.5	2374.44	1745.66	8994.15	674.68	5390.7	7776.18	8821.06	41907.3	1545.2	1165.27	20315.2	5096.64	815.94	1349.55	221.73	1690.87	1751.56	2840.62	3898.85	4203.55	7927.6	16343	201.43	275.32	721.16	4872.33	3615.6	2638.85
2009-03-29	14119.5	1462.74	885.43	1237.51	8626.97	10048.5	2374.44	1745.66	8994.15	681.11	5390.7	7776.18	8821.06	41907.3	1545.2	1165.27	20315.2	5096.64	815.94	1349.55	221.73	1690.87	1751.56	2840.62	3898.85	4203.55	7927.6	16343	201.43	275.32	721.16	4872.33	3615.6	2638.85
2009-03-30	13456.3	1419.09	869.34	1197.46	8236.08	9568.14	2358.04	1673.14	8910.42	657.99	5206.05	7522.02	8596.22	40653.1	1501.8	1123.28	19530.2	4899.05	787.53	1332.47	211.11	1620.54	1700.44	2719.34	3762.91	3989.23	7601.1	15269	194.98	265.08	682.91	4745.76	3544.6	2639.22
2009-03-31	13576	1434.07	872.55	1206.26	8109.53	9708.5	2373.21	1699.99	8981.95	666.14	5210.84	7608.92	8720.39	40925.9	1528.59	1125.95	19626.8	4978.98	797.87	1359.35	216.98	1696.62	1748.74	2807.34	3926.14	4084.76	7815	15875	200.1	269.49	689.63	4927.43	3532.3	2594.68
2009-04-01	13519.5	1461.75	884.18	1233.36	8351.91	9901.99	2408.02	1702.26	9156.01	666.26	5314.45	7761.6	8941.82	41976.3	1551.6	1134.61	19880.4	5085.76	811.08	1385.57	220.7	1711.55	1772.84	2839.61	3955.61	4131.07	7961	16047	206.68	271	685.51	5014.9	3527.2	2571.8
2009-04-02	14522	1499.73	905.07	1276.97	8719.78	10348.8	2425.29	1803.34	9300.92	699.94	5473.78	7978.08	9073.14	43736.4	1602.63	1134.61	20562.6	5267.1	834.38	1419.19	232.05	1792.54	1831.13	2992.06	4124.97	4381.92	8334.7	16811	216.83	284.56	733.93	5178.53	3621.8	2576.7
2009-04-03	14545.7	1500.36	907.01	1283.75	8749.84	10348.8	2419.78	1820.87	9244.66	699.94	5529.63	8017.59	9065.46	44391	1621.87	1196.97	20933.8	5318.75	842.5	1403.39	230.76	1824.54	1808.37	2958.74	4029.67	4384.99	8319.9	16900	217.05	276.33	746.03	5042.99	3674	2622.28
2009-04-05	14545.7	1500.36	907.01	1283.75	8749.84	10348.8	2419.78	1820.87	9244.66	710.41	5529.63	8017.59	9065.46	44391	1621.87	1196.97	20933.8	5318.75	842.5	1403.39	230.76	1824.54	1808.37	2958.74	4029.67	4384.99	8319.9	16900	217.05	276.33	746.03	5042.99	3674	2622.28
2009-04-06	14998	1516.64	923.77	1297.85	8857.93	10534.9	2419.78	1847.98	9244.66	692.52	5556.22	7975.85	9016.17	44167.3	1606.71	1185.06	20807.2	5249.48	835.48	1387.53	228.85	1803.06	1800.15	2929.75	3993.54	4349.81	8321.1	16690	216.92	275.15	748.62	5002.08	3694.9	2623.91
2009-04-07	14929	1490.86	919.84	1300.1	8832.85	10534.9	2439.18	1802.39	9232.26	691.69	5576.85	7789.56	8824.75	43824.5	1561.61	1149.74	20623.4	5120.67	815.55	1377.73	227.39	1740.32	1765.51	2902.31	3930.52	4322.5	8346	16561	215.13	267.38	740.47	4974.2	3664.2	2615.02
2009-04-08	14474.9	1465.75	907.87	1262.07	8595.01	10742.3	2347.39	1783.96	8896.97	691.69	5443.56	7837.11	8969.28	44182	1590.66	1163.1	20530.6	5176.41	825.16	1387.53	228.24	1789.52	1770.66	2921.06	3925.52	4357.92	8404.7	16939	216.9	262.53	760.58	4999.8	3561.2	2567.23
2009-04-09	14901.4	1465.75	917.89	1316.35	8916.06	10803.9	2379.88	1828.51	9030.31	691.69	5667.8	8083.38	9187.12	45538.7	1652.54	1163.1	20530.6	5376.44	856.56	1393.72	232.84	1836.69	1807.14	2974.18	3983.71	4491.12	8704.8	17408	220.12	262.53	810.9	5070.6	3617.5	2571.15
2009-04-10	14901.4	1465.75	941.38	1336.04	8918.67	10803.9	2444.23	1828.51	9345.44	691.69	5781.96	8083.38	9187.12	45538.7	1652.54	1163.1	20530.6	5376.44	856.56	1393.72	232.84	1836.69	1807.14	2974.18	3983.71	4491.12	8704.8	17408	220.12	262.53	817.41	5070.6	3617.5	2571.15
2009-04-12	14901.4	1465.75	941.38	1336.04	8918.67	10803.9	2444.23	1828.51	9345.44	718.36	5781.96	8083.38	9187.12	45538.7	1652.54	1163.1	20530.6	5376.44	856.56	1393.72	232.84	1836.69	1807.14	2974.18	3983.71	4491.12	8704.8	17408	220.12	262.53	817.41	5070.6	3617.5	2571.15
2009-04-13	14901.4	1540.4	941.41	1338.26	8924.43	10967.2	2513.7	1876.77	9539.8	716.54	5857.64	8057.81	9285.62	45991.9	1653.31	1224.6	21839	5409.55	858.73	1402.03	232.84	1836.69	1807.14	2974.18	3983.71	4491.12	8704.8	17408	220.12	262.53	818.58	5070.6	3617.5	2571.15
2009-04-14	15580.2	1570.26	953.71	1342.63	8842.68	10967.2	2527.18	1897.02	9678.18	716.54	5892.68	7920.18	9231.62	45418.2	1625.72	1206.43	21918.6	5301.7	841.5	1365.51	235.45	1912.32	1822.32	3000.22	3988.99	4557.01	8834.8	17816	227.97	273.2	807.61	5099.32	3698	2611.58
2009-04-15	15669.6	1593.66	956.68	1333.09	8742.96	11284.7	2536.06	1905.99	9724.58	716.54	5875.19	8029.62	9246.11	45272.7	1626.8	1214.92	21861.4	5384.97	852.06	1408.21	235.9	1851.34	1848.33	2985.74	3968.4	4549.79	8711.9	17811	224.95	275.61	805.85	5065.43	3693.9	2599.65
2009-04-16	15583	1625.09	961.28	1336.72	8755.26	10947.4	2534.13	1891.75	9711.36	729	5997.17	8125.43	9343.37	46024.8	1670.44	1254.73	22189.2	5454.27	865.3	1413.11	238.49	1860.68	1873.87	3038.18	4052.98	4609.46	8874.5	18154	229.49	281.46	819.57	5163.95	3725.6	2662.67
2009-04-17	15601.3	1634.79	965.17	1329	8907.58	11023.1	2503.94	1896.56	9580.06	729	5755.38	8131.33	9437.65	45778.3	1673.07	1258.47	22234.8	5480.6	869.6	1394.67	243.81	1914.24	1923.46	3091.96	4092.8	4676.84	9030.9	18510	236.1	289.66	835.16	5192.63	3735.7	2713.33
2009-04-19	15601.3	1634.79	965.17	1329	8907.58	11023.1	2503.94	1896.56	9580.06	718.06	5755.38	8131.33	9437.65	45778.3	1673.07	1258.47	22234.8	5480.6	869.6	1394.67	243.81	1914.24	1923.46	3091.96	4092.8	4676.84	9030.9	18510	236.1	289.66	835.16	5192.63	3735.7	2713.33
2009-04-20	15750.9	1661.84	968.37	1336.39	8924.75	10979.5	2557.46	1874.85	9793.64	700.5	5781.66	7841.73	9126.15	44433.2	1608.21	1193.03	21587.5	5220.12	832.39	1355.87	233.77	1831.08	1856.69	2969.4	3990.86	4486.3	8718.2	17731	225.58	277.88	800.22	5065.18	3722.3	2697.31
2009-04-21	15285.9	1628.85	966.6	1336.81	8711.33	10898.1	2535.83	1887.25	9640.9	689.55	5881.41	7969.56	9247.17	44433.2	1643.85	1220.34	21216.9	5339.59	850.08	1376.08	234.72	1819.02	1884.15	2973.94	3987.46	4501.63	8615.8	17688	228.16	281.08	775.24	5076.72	3633.1	2667.8
2009-04-22	14878.5	1615.23	968.58	1356.02	8727.3	10817.5	2461.35	1843.41	9249.08	700.21	5886.11	7886.57	9279.15	44888.2	1646.12	1226.97	21480	5290.61	843.55	1361.64	236.88	1807.25	1903.89	3025.24	4030.66	4594.42	8834.1	18086	236.85	282.98	785.13	5063.7	3627.2	2658.25
2009-04-23	15214.5	1592.7	978.64	1368.8	8847.01	11135	2463.95	1859.98	9360.84	716.03	5875.24	7957.06	9409.5	45801.2	1652.21	1228.29	21829.3	5372.1	851.92	1396.45	235.3	1795.48	1905.37	3008.62	4018.23	4538.21	8769.2	18145	238.34	281.14	820.7	5023.9	3695.8	2653.98
2009-04-24	15258.9	1591.34	992.68	1354.1	8707.99	11329	2448.59	1852.85	9315.21	716.03	5880.77	8076.29	9549.48	46771.8	1694.29	1259.23	22582.2	5468.41	866.23	1406.89	239.34	1860.71	1955.82	3102.85	4155.99	4674.32	8888.2	18651	240.74	288.88	831.41	5113.05	3668.3	2651.68
2009-04-26	15258.9	1591.34	992.68	1354.1	8707.99	11329	2448.59	1852.85	9315.21	732.91	5880.77	8076.29	9549.48	46771.8	1694.29	1259.23	22582.2	5468.41	866.23	1406.89	239.34	1860.71	1955.82	3102.85	4155.99	4674.32	8888.2	18651	240.74	288.88	831.41	5113.05	3668.3	2651.68
2009-04-27	14840.4	1576.08	980.12	1339.82	8726.34	11371.9	2405.35	1818.61	9082.22	728.33	5705.05	8025	9394.8	45819.7	1679.41	1244.52	21827.1	5389.83	857.51	1383.47	238.14	1825.27	1934.02	3102.43	4167.01	4694.07	8777	18823	241.53	287.05	803.17	5175.97	3690	2661.88
2009-04-28	14555.1	1595.92	965.7	1300.24	8493.77	11001.8	2401.44	1808.41	9104.3	728.33	5596.73	8016.95	9348.03	45821.4	1673.81	1243.76	21662.5	5369.85	855.16	1386.3	234.83	1787.66	1920.82	3051.02	4096.4	4607.42	8656.3	18498	233.53	286.3	784.01	5109.09	3680.3	2690.01
2009-04-29	14957	1644.18	967.46	1338.42	8493.77	11403.2	2468.19	1849.57	9383.21	728.33	5614.06	8185.73	9416.31	47226.8	1711.94	1270.61	22079.3	5516.14	873.64	1412.37	238.07	1816.11	1950.98	3116.94	4189.59	4704.56	8891.3	18904	238.41	295	814.78	5152.72	3662.4	2700.03
2009-04-30	15521	1722.77	990.74	1369.36	8828.26	11403.2	2477.57	1920.28	9502.52	745.25	5992.57	8168.12	9326.61	47289.5	1717.3	1275.25	21898.8	5513.36	872.81	1416.59	240.76	1863.01	1953.35	3159.85	4243.71	4769.45	9038	19177	237.58	298.24	832.87	5225.92	3744.7	2743
2009-05-01	15521	1729.58	990.74	1369.36	8977.37	11403.2	2477.57	1920.28	9502.52	745.25	5992.57	8212.41	9496.96	47289.5	1719.2	1275.25	21898.8	5568.76	877.52	1440.03	240.76	1863.01	1953.35	3159.85	4243.22	4769.45	9038	19177	237.58	298.24	832.87	5225.92	3737.9	2719.66
2009-05-03	15521	1729.58	990.74	1369.36	8977.37	11403.2	2477.57	1920.28	9502.52	748.6	5992.57	8212.41	9496.96	47289.5	1719.2	1275.25	21898.8	5568.76	877.52	1440.03	240.76	1863.01	1953.35	3159.85	4243.22	4769.45	9038	19177	237.58	298.24	832.87	5225.92	3737.9	2719.66
2009-05-04	16381	1788.15	1009.36	1397.92	8977.37	12134.8	2559.91	2028.71	9899.67	755.04	6330.4	8426.74	9870.37	50404.5	1763.56	1352.88	23014	5800.22	907.24	1451.47	251.47	1958.06	1993.47	3237.97	4243.22	4902.45	9074.7	19792	243.24	313.46	855.67	5318.34	3846	2757.07
2009-05-05	16430.1	1772.07	1009.36	1397.92	8977.37	12134.8	2567.34	2028.71	9947.81	759.02	6379.94	8410.65	9880.72	50404.5	1754.12	1363.19	23014	5770.76	903.8	1432.8	252.16	1998.1	1993.47	3225	4243.22	4853.03	9136.7	19685	244.18	313.46	855.67	5318.34	3862.2	2818.56
2009-05-06	16834.6	1798.34	1009.36	1393.45	8977.37	11952.8	2592.52	2179.03	10149.1	768.51	6566.7	8512.28	10143.4	51499.5	1759.1	1409.91	23906.1	5890.55	919.53	1468.38	255.28	2018.51	2024.9	3283.51	4396.49	4880.71	9229	20104	249.58	315.25	897.1	5319.26	3833.8	2838.97
2009-05-07	17217.9	1828.85	1023.47	1401.08	9385.7	12116.9	2597.45	2241.6	10108.9	769.43	6572.87	8409.85	9967.05	50058.1	1716.24	1423.92	23589.4	5800.09	907.39	1468.12	256.69	2068.71	2073.54	3251.52	4398.68	4804.1	9228.9	19814	247.78	322.8	942.31	5325.63	3912.1	2838.6
2009-05-08	17389.9	1862.53	1026.78	1412.13	9432.83	11876.4	2625.65	2238.21	10183.1	769.43	6583.87	8574.65	10238	51396	1739	1500.06	24085.6	6000.39	929.23	1522.75	261.35	2119.6	2126.23	3312.59	4462.09	4913.9	9408.1	20509	250.6	333.04	938.27	5391.01	3916.4	2859.98
2009-05-10	17389.9	1862.53	1026.78	1412.13	9432.83	11876.4	2625.65	2238.21	10183.1	780.97	6583.87	8574.65	10238	51396	1739	1500.06	24085.6	6000.39	929.23	1522.75	261.35	2119.6	2126.23	3312.59	4462.09	4913.9	9408.1	20509	250.6	333.04	938.27	5391.01	3916.4	2859.98
2009-05-11	17088	1830.74	1025.5	1415.16	9446.09	11683	2579.75	2166.1	9868.79	759.44	6647.5	8418.77	10094.1	50976.4	1731.24	1512.11	23943	5849.3	909.24	1489.9	256.47	2067.27	2085.68	3248.67	4435.5	4866.91	9316.8	20200	245.19	326.05	938.27	5358.94	3908	2831.82
2009-05-12	17153.6	1842.02	1023.02	1403.51	9298.61	12158	2618.17	2178.13	10179.1	767.66	6432.55	8469.11	10077.7	50325.8	1715.92	1525.22	23696.5	5859.14	908.35	1511.71	255.33	2044.36	2049.45	3231.1	4425.54	4854.11	9269	20337	241.44	329.57	979.82	5346.03	3863.6	2813.54
2009-05-13	17059.6	1851.33	1022.84	1414.52	9340.49	12019.6	2663.77	2185.29	10294.4	752.49	6485.14	8284.89	9709.51	48679.2	1664.19	1461.22	23155	5666.47	883.92	1473.65	250.19	1943.46	2016.37	3152.9	4331.37	4727.61	9000.6	19381	234.44	322.15	947.53	5277.37	3844	2810.61
2009-05-14	16541.7	1785	1011.99	1380.95	9093.73	11872.9	2639.89	2122.11	10252.1	753.3	6364.17	8331.32	9849.2	49446	1689.21	1448.18	23405.9	5733.45	893.07	1483.86	249.02	1942.37	1978.37	3156.29	4362.58	4738.47	8984.2	19271	237.28	321.53	932.11	5360	3720.2	2782.65
2009-05-15	16790.7	1750.91	1014.21	1391.73	9265.02	12173.4	2645.26	2139.78	10273.2	753.3	6489.09	8268.64	9762.85	49007.2	1680.14	1438.64	23341.7	5662.89	882.88	1473.3	252.92	1959.31	2005.33	3169.05	4348.11	4737.5	8978.6	19548	239.57	323.08	936.27	5350.67	3756.4	2794.4
2009-05-17	16790.7	1750.91	1014.21	1391.73	9265.02	12173.4	2645.26	2139.78	10273.2	751.49	6489.09	8268.64	9762.85	49007.2	1680.14	1438.64	23341.7	5662.89	882.88	1473.3	252.92	1959.31	2005.33	3169.05	4348.11	4737.5	8978.6	19548	239.57	323.08	936.27	5350.67	3756.4	2794.4
2009-05-18	17022.9	1803.57	1012.01	1386.68	9038.69	14284.2	2652.78	2172.92	10314	764.1	6577.81	8504.08	9762.85	51459.5	1730.95	1522.03	23935.5	5866.8	909.71	1507.53	259.17	1994.03	2049.67	3245.39	4446.45	4851.96	9159.3	19953	243.86	331.06	939.65	5435.12	3721.6	2780.8
2009-05-19	17544	1886.02	1023.49	1428.21	9290.29	14302	2676.68	2260.36	10424.4	784.33	6655.59	8474.85	10101	51346.6	1734.54	1533.39	24344.6	5872.22	908.13	1503.92	262.23	2044.76	2078.75	3274.96	4482.25	4959.62	9341.6	20172	247.2	335.59	968.88	5498.8	3800.9	2789.1
2009-05-20	17475.8	1885.72	1042.63	1435.7	9344.64	14060.7	2651.41	2269.24	10369.1	794.73	6703.62	8422.04	10232.4	51245.1	1727.84	1550.15	24399.6	5870.39	903.47	1533.28	266.3	2106.88	2107.98	3303.37	4468.41	5038.94	9389.4	20525	245.94	340.47	1023.98	5509.27	3807.6	2801.46
2009-05-21	17199.5	1885.72	1035.56	1421.65	9264.15	13736.5	2610.62	2210.97	10108.9	784.84	6718.81	8292.13	9949.59	50087.3	1695.25	1560.85	23821.3	5780.54	888.33	1522.67	259.02	2106.88	2056.37	3217.41	4345.47	4900.67	9225.3	19883	245.94	340.47	1001.36	5509.27	3806.4	2770.53
2009-05-22	17062.5	1881.71	1045.26	1403.75	9225.81	13887.1	2597.6	2245.27	10072.6	784.84	6737.29	8277.32	9993.42	50568.5	1692.01	1562.4	24093.2	5789.62	887	1535.11	260.14	2053.88	2064.64	3227.97	4365.29	4918.75	9308.6	20007	241.72	332.98	1013.37	5409.26	3755.4	2762.4
2009-05-24	17062.5	1881.71	1045.26	1403.75	9225.81	13887.1	2597.6	2245.27	10072.6	781.35	6737.29	8277.32	9993.42	50568.5	1692.01	1562.4	24093.2	5789.62	887	1535.11	260.14	2053.88	2064.64	3227.97	4365.29	4918.75	9308.6	20007	241.72	332.98	1013.37	5409.26	3755.4	2762.4
2009-05-25	17121.8	1890.97	1053.14	1400.9	9347	13913.2	2610.01	2267.46	10182.2	785.31	6734.46	8277.32	10069.5	50816.2	1692.01	1562.4	24199	5789.62	887	1535.11	260.66	2065.08	2074.97	3236.16	4365.29	4918.45	9347.4	19967	241.63	334.46	1017.92	5446.24	3735.3	2748.39
2009-05-26	16991.6	1857.59	1051.63	1372.04	9310.81	13589.2	2588.58	2238.79	10022.3	775.65	6683.11	8473.49	10285.9	51840.8	1750.43	1582.3	24640.1	5936.58	910.33	1580.73	263.43	2039.57	2065.59	3270.09	4411.72	4985.6	9405.7	20297	242.05	332.24	990.26	5431.27	3781.6	2732.02
2009-05-27	17885.3	1892.84	1047.68	1362.02	9438.77	14109.6	2632.93	2306.08	10127.9	791.03	6890.44	8300.02	10142.2	51791.6	1731.08	1567.36	24507.8	5823.56	893.06	1562.52	264.2	2042.52	2084.52	3294.86	4416.23	5000.77	9510.8	20312	241.83	334.71	1030.79	5419.42	3799.2	2764.3
2009-05-28	17885.3	1902.88	1041.24	1392.17	9451.39	14296	2632.93	2292.97	10127.9	791.03	6890.44	8403.8	10392.4	53040.7	1751.79	1560.41	24659.2	5917.06	906.83	1590.02	260.9	2028.58	2063.65	3263.7	4387.54	4932.88	9435.5	20150	241.26	336.14	1053.73	5350.59	3753.9	2725.78
2009-05-29	18171	1916.83	1044.11	1395.89	9522.5	14625.2	2632.93	2329.08	10127.9	791.03	6890.44	8500.33	10370.1	53197.7	1774.33	1587.21	24331.7	6004.07	919.14	1611.28	259.45	2105.39	2071.37	3277.65	4417.94	4940.82	9424.3	19884	242.39	343.11	1087.59	5349.74	3814.8	2753.72
2009-05-31	18171	1916.83	1044.11	1395.89	9522.5	14625.2	2632.93	2329.08	10127.9	807.99	6890.44	8500.33	10370.1	53197.7	1774.33	1587.21	24331.7	6004.07	919.14	1611.28	259.45	2105.39	2071.37	3277.65	4417.94	4940.82	9424.3	19884	242.39	343.11	1087.59	5349.74	3814.8	2753.72
2009-06-01	18888.6	1998.58	1061.8	1415.1	9677.75	14840.6	2721.28	2380.07	10421.4	822.41	6954.1	8721.44	10604.1	54486.3	1828.68	1656.11	25105.6	6169.07	942.87	1645.21	268.42	2105.39	2091.61	3379.49	4506.19	5142.56	9630.9	20511.7	250.05	343.11	1167.42	5349.74	3887.9	2753.72
2009-06-02	18389.1	1998.64	1063.62	1412.85	9704.31	14874.9	2724.3	2375.82	10484.3	825.42	6949.08	8740.87	10588.8	53999.5	1836.8	1668.76	25183.8	6182.87	944.74	1661.63	268.99	2181.63	2084.9	3378.04	4477.02	5144.06	9664.8	20523.7	248.59	356.48	1180.56	5432.22	3940.2	2801.3
2009-06-03	18576.5	2010.91	1055.4	1414.89	9741.67	14870.9	2778.59	2383.82	10712.3	811.46	6893.14	8675.24	10290.1	52086.6	1825.92	1600.93	24651.3	6033.94	931.76	1613.58	264.37	2138.52	2066.54	3309.65	4383.42	5054.53	9464.8	20117.7	241.4	343.72	1127.57	5384.71	4009.4	2833.94
2009-06-04	18502.8	2032.72	1063.97	1378.14	9668.96	15008.7	2767.24	2362.74	10733.7	809.51	6786.06	8750.24	10477.2	53463.9	1850.02	1654.56	24748	6110.76	942.46	1626.98	263.8	2122.59	2063.02	3312.03	4386.94	5064.8	9454.6	20129.4	240.94	348.44	1108.73	5422.21	3932.5	2826.2
2009-06-05	18679.5	2078.93	1075.5	1394.71	9768.01	15103.5	2753.89	2396.35	10667.1	809.51	6767.1	8763.13	10569.3	53341	1849.42	1638.1	24913	6082.64	940.09	1609.79	266.93	2145.58	2071.39	3339.05	4438.56	5077.03	9519	20170.1	241.52	352.8	1149.95	5398.9	3968.8	2831.57
2009-06-07	18679.5	2078.93	1075.5	1394.71	9768.01	15103.5	2753.89	2396.35	10667.1	814.28	6767.1	8763.13	10569.3	53341	1849.42	1638.1	24913	6082.64	940.09	1609.79	266.93	2145.58	2071.39	3339.05	4438.56	5077.03	9519	20170.1	241.52	352.8	1149.95	5398.9	3968.8	2831.57
2009-06-08	18253.4	2056.65	1072.85	1393.3	9865.63	14665.9	2768.34	2333.7	10611.8	811.38	6628.02	8764.49	10549.1	53630.4	1842.4	1625.26	24932.9	6068.56	939.14	1611.25	262.39	2117.52	2046.17	3289.66	4405.22	5004.72	9396.2	20070.6	240.56	343.97	1096.68	5391.72	3968.8	2816.08
2009-06-09	18058.5	2093.29	1071.79	1371.84	9786.82	15127	2787.89	2349.87	10740.1	825.62	6414.39	8763.06	10532.4	53157.1	1860.13	1641.7	25107.4	6101.57	942.43	1612.78	263.03	2133.13	2056.61	3296.73	4404.79	4997.86	9497.7	20070.6	240.3	348.72	1105.3	5388.67	3933.6	2815.58
2009-06-10	18785.7	2108.81	1082.97	1414.88	9991.49	15466.8	2816.25	2391.22	10820.7	817.77	6462.27	8739.02	10598	53410.9	1853.08	1654.99	25183.7	6098.06	939.15	1614.37	266.96	2189.12	2064.32	3315.27	4436.75	5051.18	9627.6	20299	245.42	356.13	1121.79	5436.39	4016.3	2829.37
2009-06-11	18791	2089.58	1088.96	1419.39	9981.33	15411.5	2797.32	2381.81	10699.9	811.91	6567.37	8770.92	10714.1	53410.9	1862.37	1669.54	25372.8	6163.13	944.89	1643.34	268.11	2189.12	2059.75	3334.94	4461.87	5107.26	9708.4	20585.1	250.37	362.22	1127.23	5483.85	4047.3	2801.11
2009-06-12	18889.7	2090.94	1090.15	1428.59	10135.8	15237.9	2743.76	2377.07	10524.1	811.91	6448.23	8799.26	10645	53558.2	1858.8	1654.56	25460	6148.61	946.21	1623	265.48	2190.24	2070.19	3326.14	4441.95	5069.24	9714.4	20384.2	248.82	357.86	1127.23	5521.84	4063.1	2799.98
2009-06-14	18889.7	2090.94	1090.15	1428.59	10135.8	15237.9	2743.76	2377.07	10524.1	813.97	6448.23	8799.26	10645	53558.2	1858.8	1654.56	25460	6148.61	946.21	1623	265.48	2190.24	2070.19	3326.14	4441.95	5069.24	9714.4	20384.2	248.82	357.86	1127.23	5521.84	4063.1	2799.98
2009-06-15	18499	2069.88	1091.17	1412.42	10039.7	14875.5	2789.55	2316.56	10769	788.13	6225.56	8612.13	10394.8	52033.8	1816.38	1654.56	24899.7	5967.26	923.72	1584.88	258.26	2126.77	2008.98	3219.58	4326.01	4889.94	9518.7	19770.5	244.35	347.07	1077.17	5400.15	4030.4	2821.3
2009-06-16	18165.5	2030.37	1074.12	1399.15	9752.88	14957.9	2776.02	2288.16	10797.2	792.69	6220.81	8504.67	10307.4	51205.8	1796.18	1586.23	24224.8	5886.76	911.97	1572.49	257.01	2105.07	1995.59	3213.95	4328.57	4890.72	9497.9	19589.6	245.67	351.72	1082.19	5377.1	3962.9	2788.89
2009-06-17	18084.6	2024.96	1070.9	1391.17	9840.85	14522.8	2810.12	2271.45	11040.5	773.12	6195.91	8497.18	10066.1	51045.8	1808.06	1534.64	24150.9	5864.55	910.71	1575.85	251.23	2020.73	1964.64	3161.14	4278.46	4799.98	9283.2	19023	240.73	337.14	1038.41	5302.29	3904.2	2771.72
2009-06-18	17776.7	1950.99	1054.41	1375.76	9703.72	14265.5	2853.9	2237.2	11151.6	771.89	6144.53	8555.6	10121.5	50903	1807.72	1529.9	24340.7	5906.2	918.37	1570.7	253.52	2027.85	1980.83	3194.06	4280.86	4837.48	9384	19233.8	241.51	340.59	997.68	5376.84	3875.4	2797.11
2009-06-19	17920.9	1990.47	1059.5	1383.34	9786.26	14521.9	2880.49	2273.18	11242.3	771.89	6231.15	8539.73	10288	51373.8	1827.47	1559.46	24274.7	5934.24	921.23	1582.78	257.16	2066.58	1997.71	3221.27	4345.93	4839.46	9580.9	19348	241.51	341.71	1011.38	5421.59	3908.3	2787.99
2009-06-21	17920.9	1990.47	1059.5	1383.34	9786.26	14521.9	2880.49	2273.18	11242.3	791.81	6231.15	8539.73	10288	51373.8	1827.47	1559.46	24274.7	5934.24	921.23	1582.78	257.16	2066.58	1997.71	3221.27	4345.93	4839.46	9580.9	19348	241.51	341.71	1011.38	5421.59	3908.3	2787.99
2009-06-22	18059.5	1975.03	1045.97	1399.71	9826.27	14326.2	2896.3	2266.92	11190.7	783.46	6341.21	8339.01	9834.18	49494.8	1766.19	1495.98	23314.7	5725.07	893.04	1548.35	249.09	1959.06	1948.42	3123.25	4234.05	4693.4	9338.5	18541.3	234.22	320.72	961.04	5310.37	3909.4	2794.49
2009-06-23	17538.4	1914.38	1044.48	1364.77	9538.3	14324	2892.7	2226.1	11125.7	782.63	6197.47	8322.91	9896.72	49813.6	1764.92	1506.9	23496.4	5759.49	895.1	1554.08	248.69	1941.49	1966.43	3116.82	4230.02	4707.15	9348.7	18464.1	233.82	319.6	932.74	5321.31	3794.9	2757.05
2009-06-24	17892.2	1995.67	1057.85	1363.79	9590.32	14422.7	2922.3	2278.96	11381.6	797.79	6380.08	8299.86	10100.9	49672.1	1792.34	1545.81	23711.2	5795.72	900.94	1556.19	254.63	2040.23	2016.35	3184.76	4279.98	4836.01	9617.6	19040.6	241.84	328.97	959.18	5443.42	3802.2	2741.22
2009-06-25	18275	2044.17	1074.11	1392.73	9788.48	14345.6	2925.05	2302.46	11385.9	783.05	6457.61	8472.4	10355.9	51514.8	1829.54	1580.96	24245.7	5911.03	920.26	1589.29	254.12	2045.49	2015.68	3163.1	4252.57	4800.56	9667.2	18940.6	240.61	325.88	947.52	5361.3	3852.9	2768.01
2009-06-26	18600.3	2040.19	1075.77	1394.53	9877.39	14764.6	2928.21	2317.95	11413.2	783.05	6463.56	8438.39	10389.8	51485.6	1838.22	1579.99	24458.2	5906.9	918.9	1591.3	254.43	2044.53	2013.32	3129.73	4241.01	4776.47	9686.9	18831.5	242.34	330.45	955.45	5375.99	3898.9	2767.54
2009-06-28	18600.3	2040.19	1075.77	1394.53	9877.39	14764.6	2928.21	2317.95	11413.2	799.92	6463.56	8438.39	10389.8	51485.6	1838.22	1579.99	24458.2	5906.9	918.9	1591.3	254.43	2044.53	2013.32	3129.73	4241.01	4776.47	9686.9	18831.5	242.34	330.45	955.45	5375.99	3898.9	2767.54
2009-06-29	18528.5	2033.72	1075.84	1388.45	9783.47	14785.7	2975.31	2317.17	11605.5	809.96	6391.15	8529.38	10476.8	52137.6	1844.06	1589.3	24473.5	5962.5	927.23	1593.28	258.24	2108.18	2037.74	3193.68	4294.03	4885.09	9845.7	19096.2	247.57	334.52	951.46	5443.45	3882.7	2772.18
2009-06-30	18378.7	2026.78	1075.24	1390.07	9958.44	14731.7	2959.36	2333.14	11566.6	801.26	6432.16	8447	10374.9	51465.5	1835.04	1587.97	24368.4	5905.14	919.32	1582.04	254.71	2098.65	2030.98	3140.44	4249.21	4808.64	9787.8	19063.1	244.75	333.08	987.02	5403.97	3947.8	2786
2009-07-01	18378.7	2048.53	1079.4	1414.3	9939.93	14645.5	3008.15	2352.55	11848.8	811.85	6578.97	8504.06	10374.9	51543.8	1845.72	1610.11	24524	5954	923.33	1593.37	260.29	2139.67	2073.98	3217	4340.71	4905.44	9903.7	19443.2	250.15	338.3	977.94	5472.94	3882.6	2777.01
2009-07-02	18178	2065.75	1078.71	1411.48	9876.15	14658.5	3060.25	2320.82	11970.7	803.24	6667.53	8280.74	10245.9	51024.9	1796.52	1561.94	24051.5	5779.83	896.42	1564.44	252.69	2099.38	2038.05	3116.41	4234.27	4718.49	9643.5	18928.7	244.55	331.99	960.46	5355.23	3875.2	2772.18
2009-07-03	18203.4	2075.3	1072.69	1420.04	9816.07	14913	3088.37	2299.75	12258.8	803.24	6665.4	8280.74	10283.1	50934.7	1796.52	1579.12	24045.4	5779.83	896.42	1564.44	253.7	2067.84	2040.86	3119.51	4236.28	4708.21	9707.8	18942.2	243.91	330.69	950.24	5338.51	3824.7	2757.5
2009-07-05	18203.4	2075.3	1072.69	1420.04	9816.07	14913	3088.37	2299.75	12258.8	789.66	6665.4	8280.74	10283.1	50934.7	1796.52	1579.12	24045.4	5779.83	896.42	1564.44	253.7	2067.84	2040.86	3119.51	4236.28	4708.21	9707.8	18942.2	243.91	330.69	950.24	5338.51	3824.7	2757.5
2009-07-06	17979.4	2035.01	1065.83	1428.94	9680.87	14043.4	3124.67	2266.09	12489.9	779.65	6649.91	8324.87	10027.4	50622.5	1787.4	1553.67	23742.5	5770	898.72	1568.31	249.64	2010.32	2009.98	3082.16	4194.91	4651.82	9569	18558.5	241.43	318.33	921.44	5354.15	3788.2	2747.61
2009-07-07	17862.3	2083.25	1066.36	1434.2	9647.79	14170.5	3089.45	2272.26	12362.4	786.44	6715.22	8163.6	9836.77	49456.7	1746.17	1520.47	23359.9	5654.64	881.03	1529.43	249.04	2024.76	1994.81	3048.57	4187	4598.19	9520	18321.3	241.76	318.32	924.11	5329.2	3767.8	2744.91
2009-07-08	17721.1	2083.25	1065.47	1431.02	9420.75	13769.1	3080.77	2259.77	12488.6	785.18	6668.14	8178.41	9653.45	49177.6	1747.17	1477.84	23469	5624.57	879.56	1507.45	244.63	1985.61	1960.6	3009.71	4140.23	4572.65	9360.6	17947.4	239.42	313.47	889.77	5289.39	3766	2735.16
2009-07-09	17790.6	2083.97	1065.68	1430.89	9291.06	13757.5	3123.04	2307.61	12637.9	784.12	6748.18	8183.17	9773.92	49177.6	1752.55	1477.84	23634.3	5667.37	882.68	1531.06	247.11	1975.39	1968.69	3025.94	4158.66	4630.07	9443.1	18158.6	239.1	316	884.94	5305.39	3760.9	2737.09
2009-07-10	17708.4	2063.09	1067.76	1428.62	9287.28	13504.2	3113.93	2307.98	12706	784.12	6769.86	8146.52	9749.85	49220.8	1756.03	1477.84	23656.3	5627.52	879.13	1518.37	243.2	1960.1	1964.24	2983.1	4127.17	4576.31	9344.9	17837	237.72	309.72	835.23	5237.81	3790.6	2736.47
2009-07-12	17708.4	2063.09	1067.76	1428.62	9287.28	13504.2	3113.93	2307.98	12706	772.92	6769.86	8146.52	9749.85	49220.8	1756.03	1477.84	23656.3	5627.52	879.13	1518.37	243.2	1960.1	1964.24	2983.1	4127.17	4576.31	9344.9	17837	237.72	309.72	835.23	5237.81	3790.6	2736.47
2009-07-13	17254.6	2020.14	1065.86	1378.12	9050.33	13290.6	3080.56	2266.64	12660.5	786.13	6530.82	8331.68	9891.93	49186.9	1793.21	1548.43	23952	5761.37	901.05	1541.45	249.79	2000.61	1993.59	3052.08	4202.13	4722.34	9567.4	18217.5	241	314.12	835.61	5315.29	3738.7	2739.99
2009-07-14	17885.7	2056.58	1079.63	1385.56	9261.81	13853.7	3145.16	2310.55	12991.1	796.91	6530.82	8359.49	9986.15	48872.6	1799.73	1535.38	24340.7	5805.58	905.84	1555.85	251.91	2042.62	2025.71	3081.87	4237.68	4781.69	9634	18450.5	243.68	321.23	866.55	5365.05	3850.3	2746.49
2009-07-15	18258.7	2123.28	1097.24	1420.86	9269.25	14253.2	3188.55	2389.42	13079.3	812.09	6738.6	8616.21	10215.5	51296.7	1862.9	1603.81	25336.3	5993.16	932.68	1606.99	260.82	2093.43	2082.29	3171.27	4346.46	4928.44	9905.3	19130	251.55	330.41	887.85	5473.33	3917.5	2757.19
2009-07-16	18361.9	2117.95	1108.88	1432.22	9344.16	14250.2	3183.74	2401.02	13081.9	813.77	6780.3	8711.82	10304.4	51918.2	1885.03	1624.52	25735.6	6043.05	940.74	1615.74	263.48	2124.84	2084.55	3199.68	4361.84	4957.19	9997.6	19233	252.45	329.18	903.23	5538.57	3987.8	2757.19
2009-07-17	18805.7	2106.35	1120.9	1440.1	9400.82	14744.9	3189.74	2430.96	13132	813.77	6850.99	8743.94	10369.4	52072.5	1886.61	1622.67	25742	6038.11	940.38	1624.53	266.4	2088.69	2083.11	3218.46	4388.75	4978.4	10041.9	19282.6	257.56	331.84	925	5594.14	3986.7	2803.91
2009-07-19	18805.7	2106.35	1120.9	1440.1	9400.82	14744.9	3189.74	2430.96	13132	828.18	6850.99	8743.94	10369.4	52072.5	1886.61	1622.67	25742	6038.11	940.38	1624.53	266.4	2088.69	2083.11	3218.46	4388.75	4978.4	10041.9	19282.6	257.56	331.84	925	5594.14	3986.7	2803.91
2009-07-20	19502.4	2106.35	1139.25	1478.51	9400.82	15191	3266.92	2456.15	13381.2	829.5	6938.86	8848.15	10540.7	53154.9	1909.29	1649.22	26284.1	6141.3	951.13	1636.94	269.48	2117.24	2105.34	3270.94	4443.62	5030.15	10142.8	19516.7	258.39	336.74	972.31	5627.93	4047.5	2817.69
2009-07-21	19501.7	2146.55	1134.7	1488.99	9652.02	15062.5	3213.21	2454.33	13177.2	844.73	6953.34	8915.94	10515.3	53233.6	1916.2	1652.7	26004	6154.39	954.58	1635.45	270.68	2141.3	2111.16	3302.89	4481.17	5093.97	10122.2	19830.3	261	343.21	987.69	5636.19	4053.6	2870.42
2009-07-22	19248.2	2125.62	1148.7	1494.04	9723.16	14843.1	3296.62	2450.83	13353.2	840.67	6985.32	8881.26	10432.4	53072.6	1926.38	1642.51	26288.2	6151.4	954.07	1642.71	271.19	2130.48	2125.66	3305.07	4493.73	5121.56	10153.4	19925.7	261.36	342.86	963.06	5637.02	4069.4	2904.56
2009-07-23	19817.7	2160.72	1152.15	1496.49	9792.94	15231	3328.49	2484.9	13521.6	850.79	6980.88	9069.29	10675.7	54249.4	1973.6	1679.42	26805.4	6302.52	976.29	1665.73	276.15	2177.97	2140.85	3373.72	4559.8	5247.28	10369.8	20242.3	266.74	347.51	975.96	5765.51	4069.8	2917.42
2009-07-24	19982.8	2185.65	1155.88	1502.59	9944.55	15379	3372.6	2533.43	13531.7	850.79	6980.88	9093.24	10694.4	54457.3	1965.96	1675.1	26646.4	6337.46	979.26	1672.87	276.15	2202	2135.43	3366.45	4576.61	5229.36	10438.6	20161.2	266.4	345.9	1012.62	5760.9	4094.5	2959.5
2009-07-26	19982.8	2185.65	1155.88	1502.59	9944.55	15379	3372.6	2533.43	13531.7	878.05	6980.88	9093.24	10694.4	54457.3	1965.96	1675.1	26646.4	6337.46	979.26	1672.87	276.15	2202	2135.43	3366.45	4576.61	5229.36	10438.6	20161.2	266.4	345.9	1012.62	5760.9	4094.5	2959.5
2009-07-27	20251.6	2209.1	1156.43	1524.05	10088.7	15375	3435.21	2576.66	13743.4	873.79	6980.88	9108.51	10738	54549	1967.89	1685.95	26815.3	6364.66	982.18	1680.45	278.14	2242.97	2136.92	3372.36	4586.13	5251.55	10591.7	20346.1	261.63	349.82	1037.61	5774.89	4147.8	2998.49
2009-07-28	20624.5	2237.1	1172.38	1526.03	10087.3	15331.9	3438.37	2624.04	13836.7	875.95	7142.63	9096.72	10576.8	54471.5	1975.51	1665.21	26850.8	6328.67	979.62	1673.12	274.24	2190.16	2108.78	3330.97	4528.84	5174.74	10664	20012.3	261.16	340.73	1001.8	5762.8	4174.2	3011.16
2009-07-29	20135.5	2225.81	1164.48	1524.32	10113.2	15173.5	3266.43	2604.06	13070.6	884.69	7142.63	9070.72	10455.3	53734.5	1967.76	1655.68	26516.5	6280.57	975.15	1671.94	277.32	2207.14	2120.37	3365.62	4547.53	5270.32	10661.6	20282	262.77	337.46	973.78	5787.19	4152.3	2994.21
2009-07-30	20234.1	2298.14	1160.66	1534.74	10165.2	15388	3321.56	2636.19	13272.5	884.69	7027.11	9154.46	10676.7	54478.4	1984.3	1696.19	26810.3	6384.32	986.75	1676.59	283.82	2248.1	2155.09	3435.49	4631.61	5360.66	10874.4	20818.6	268.84	346.04	1001.3	5932.62	4195.9	2993.84
2009-07-31	20573.3	2323.24	1174.9	1557.29	10356.8	15670.3	3412.06	2659.2	13670.7	884.69	7077.71	9171.61	10787.1	54765.7	1978.5	1719.87	27043.5	6424.27	987.48	1709.34	283.17	2250.19	2169.14	3426.27	4608.36	5332.14	10855.1	20575.5	269.56	347.61	1017.47	5950.69	4249.5	3017.9
2009-08-02	20573.3	2323.24	1174.9	1557.29	10356.8	15670.3	3412.06	2659.2	13670.7	903.67	7077.71	9171.61	10787.1	54765.7	1978.5	1719.87	27043.5	6424.27	987.48	1709.34	283.17	2250.19	2169.14	3426.27	4608.36	5332.14	10855.1	20575.5	269.56	347.61	1017.47	5950.69	4249.5	3017.9
2009-08-03	20807.3	2338.8	1171.31	1564.98	10352.5	15924.2	3462.59	2681.64	13857	904.88	7077.71	9286.56	10787.1	55997.8	2008.61	1781.8	27692.5	6565.65	1002.63	1722.79	287.49	2308.1	2177.77	3477.8	4682.46	5426.85	10901	20914.4	273.74	356.06	1067.98	5967.43	4270.5	3042.15
2009-08-04	20796.4	2360.09	1179.88	1566.37	10375	15831	3471.44	2648.76	13904.5	901.63	7077.71	9320.19	11018.1	56038.1	2011.31	1778.36	27869.9	6569.14	1005.65	1724.75	286.91	2323.36	2185.07	3476.37	4671.37	5417.02	10876.8	20966.9	269.41	353.5	1074.49	5939.78	4313.9	3091.05
2009-08-05	20494.8	2317.06	1179.49	1559.47	10252.5	15903.8	3428.5	2606.83	13782.9	910.2	6848.24	9280.97	11046.9	56384.1	1993.05	1806.51	28082.6	6558.19	1002.72	1718.97	285.24	2338.86	2173.27	3458.53	4644.69	5353.01	10704.4	20962.5	268.84	352.06	1094.26	5911.91	4275.4	3092.79
2009-08-06	20899.2	2359.98	1183.97	1565.04	10388.1	15514	3356.33	2601.5	13496	921.88	6868.65	9256.26	10793.4	55754.9	1973.16	1776.93	27802.4	6517.67	997.08	1696.02	288.11	2350.7	2226.5	3477.83	4690.53	5369.98	10776	21128.7	269.19	351.09	1083.79	5968.08	4326.6	3057.62
2009-08-07	20375.4	2349.13	1184.88	1576	10412.1	15160.2	3260.69	2549.35	12975.3	921.88	6868.65	9370.07	10885.3	56329.5	2000.25	1799.53	28179.5	6586.71	1010.48	1698.46	290.5	2362.11	2252.67	3521.14	4731.56	5458.96	10947.6	21402.2	274.01	353.36	1080.08	6026.4	4301.1	3063.5
2009-08-09	20375.4	2349.13	1184.88	1576	10412.1	15160.2	3260.69	2549.35	12975.3	910.17	6868.65	9370.07	10885.3	56329.5	2000.25	1799.53	28179.5	6586.71	1010.48	1698.46	290.5	2362.11	2252.67	3521.14	4731.56	5458.96	10947.6	21402.2	274.01	353.36	1080.08	6026.4	4301.1	3063.5
2009-08-10	20929.5	2389.56	1188	1576.11	10524.3	15009.8	3249.76	2549.35	12973.6	891.01	6868.65	9337.95	10793.7	56830	1992.24	1793.31	28305.3	6550.05	1007.1	1685.51	288.61	2348.69	2294.44	3504.54	4722.2	5418.12	10923	21576.6	272.05	350.1	1065.14	6007.55	4305.6	3082.63
2009-08-11	21074.2	2399.28	1186.28	1579.21	10585.5	15074.6	3264.73	2603.51	13137.1	881.46	6909.02	9241.45	10629.5	55761.2	1969.73	1759.54	27800.8	6463.62	994.35	1680.27	284.17	2301.06	2262.4	3456.18	4671.34	5285.81	10831.9	21268.5	266.99	345.76	1033.72	5949.98	4334.4	3058.51
2009-08-12	20435.2	2347.36	1180.54	1565.35	10435	15020.2	3112.72	2574.82	12591.7	879.35	6898.9	9361.61	10659.9	56588.3	1998.72	1773.29	28096	6538.87	1005.81	1692.91	288.95	2326.67	2273.34	3507.24	4716.76	5350.09	10933.8	21546.4	270.25	350.8	1025.12	5962.49	4345.9	3080.61
2009-08-13	20861.3	2396.49	1186.19	1564.64	10517.2	15518.5	3140.56	2614.18	12802.9	897.23	7034.96	9398.19	10825.6	57048	2009.35	1795.58	28155.5	6604.1	1012.73	1703.18	290.02	2404.42	2279.59	3524.39	4760.38	5401.11	11046.8	21827.2	274.05	351.55	1054.57	5986.72	4432.9	3125.68
2009-08-14	20893.3	2386.86	1188.57	1591.41	10597.3	15411.6	3046.97	2631.51	12499.8	897.23	7069.51	9321.4	10848	56638	1985.52	1761.61	27855.4	6537.82	1004.09	1686.85	288.02	2388.93	2274.24	3495.27	4713.97	5309.11	10901.9	21552.4	270.58	350.14	1059.92	5985.3	4465.1	3149.68
2009-08-16	20893.3	2386.86	1188.57	1591.41	10597.3	15411.6	3046.97	2631.51	12499.8	876.13	7069.51	9321.4	10848	56638	1985.52	1761.61	27855.4	6537.82	1004.09	1686.85	288.02	2388.93	2274.24	3495.27	4713.97	5309.11	10901.9	21552.4	270.58	350.14	1059.92	5985.3	4465.1	3149.68
2009-08-17	20137.7	2386.86	1169.05	1547.06	10268.6	14784.9	2870.63	2545.98	11668.8	857.79	6931.8	9135.34	10533.3	55218.4	1930.84	1761.61	27299.6	6352.11	979.73	1640.67	282.01	2324.98	2229.85	3419.69	4644.8	5201.61	10598.5	20962.4	265.39	341.8	1005.77	5870.28	4402.8	3087.51
2009-08-18	20306.3	2336.99	1164.41	1550.24	10285	15035.3	2910.88	2567.72	11773.3	876.12	6789.77	9217.94	10673.7	55748.9	1955.92	1727.76	27544.3	6437.07	989.67	1667.67	284.46	2358.07	2260.64	3450.69	4685.78	5250.74	10708.3	21247.8	270.07	345.47	1001.52	5953.75	4388.1	3065.44
2009-08-19	19954.2	2277.75	1155.53	1545.96	10204	14809.6	2785.58	2522.78	11209.9	870.7	6788.58	9279.16	10685.8	56156.3	1969.24	1728.21	27598.4	6479.28	996.46	1673.79	284.05	2346.54	2263.26	3450.34	4689.67	5231.98	10695.5	21132.2	269.1	345.37	993.57	5980.79	4389.9	3083.28
2009-08-20	20328.9	2328.64	1163.43	1576.39	10383.4	15012.3	2911.58	2559.57	11648.4	886.33	6733.23	9350.05	10710.4	56831.5	1989.22	1766.89	27944.2	6553.4	1007.37	1679.68	288.12	2389.91	2309.21	3505.32	4756.58	5311.06	10892.5	21394.4	274.06	350.07	1018.5	6032.05	4396.6	3055.88
2009-08-21	20199	2333.9	1163.79	1580.98	10238.2	15240.8	2960.77	2544.86	11892	886.33	6654.8	9505.96	10831.2	57728.6	2020.9	1797.33	28309	6676.26	1026.13	1707.29	294.49	2472.56	2354.65	3615.81	4850.89	5462.74	11161	21896.5	281.4	357.86	1050.44	6139.8	4311	3034.68
2009-08-23	20199	2333.9	1163.79	1580.98	10238.2	15240.8	2960.77	2544.86	11892	918.36	6654.8	9505.96	10831.2	57728.6	2020.9	1797.33	28309	6676.26	1026.13	1707.29	294.49	2472.56	2354.65	3615.81	4850.89	5462.74	11161	21896.5	281.4	357.86	1050.44	6139.8	4311	3034.68
2009-08-24	20535.9	2373.84	1174.49	1613.43	10572.5	15628.8	2993.43	2612.33	12075.8	916.8	6838.25	9509.28	10790	57775.4	2017.98	1780.93	28004.3	6671.14	1025.57	1701.85	297.88	2554.77	2395.26	3652.17	4896.23	5519.75	11303.8	22354.9	284.02	364.11	1094	6194.39	4429.8	3068.58
2009-08-25	20435.2	2380.52	1171.09	1601.38	10497.4	15688.5	2915.8	2618.76	11688.2	931.5	6809.41	9539.29	10920.5	57421.4	2024.23	1779.8	28005.5	6697.22	1028	1693.93	300.03	2554.76	2414.8	3680.61	4916.8	5557.09	11427.8	22473.8	282.44	365.32	1103.02	6200.85	4417.5	3080.5
2009-08-26	20456.3	2380.09	1172.56	1614.12	10639.7	15769.9	2967.6	2628.43	11995	924.14	6719.21	9543.52	10912.2	57765.7	2024.43	1778.26	28212.8	6687.94	1028.12	1683	298.64	2504.27	2400.15	3668.34	4890.58	5521.97	11376.4	22554.7	278.84	358.47	1072.05	6176.97	4467.2	3095.46
2009-08-27	20242.8	2356.06	1176.9	1599.33	10474	15781.1	2946.4	2642.23	11897.7	908.12	6690.75	9580.63	10934	57703.8	2027.73	1778.34	28437.3	6722.31	1030.98	1692.47	296.9	2499.07	2375.85	3648.53	4869.35	5470.33	11356.9	22474.8	278.28	353.26	1070.49	6169.19	4458.1	3078.6
2009-08-28	20098.6	2377.25	1174.27	1607.94	10534.1	15922.3	2860.69	2642.8	11450.1	908.12	6809.86	9544.2	10978	57700.6	2028.77	1797.02	28599.9	6709.05	1028.93	1686.06	300.2	2554.82	2393.66	3693.14	4908.9	5517.35	11442.7	22672.5	283.27	358.6	1091.76	6211.58	4495.9	3103.64
2009-08-30	20098.6	2377.25	1174.27	1607.94	10534.1	15922.3	2860.69	2642.8	11450.1	888.42	6809.86	9544.2	10978	57700.6	2028.77	1797.02	28599.9	6709.05	1028.93	1686.06	300.2	2554.82	2393.66	3693.14	4908.9	5517.35	11442.7	22672.5	283.27	358.6	1091.76	6211.58	4495.9	3103.64
2009-08-31	19724.2	2341.54	1174.27	1591.85	10492.5	15666.6	2667.75	2605.39	10585.1	883.76	6825.95	9496.28	10868.2	56489	2009.06	1781.89	28130	6643.24	1020.62	1670.68	296.27	2503.98	2364.95	3653.54	4908.9	5464.61	11365.1	22420.4	278.95	350.06	1064.73	6217.12	4480.4	3096.1
2009-09-01	19872.3	2326.91	1171.28	1623.06	10530.1	15551.2	2683.72	2596.39	10614.3	896.73	7019.75	9310.6	10689.8	55815	1968.89	1743.64	27749.2	6487.81	998.04	1662.95	291	2463.91	2332.16	3583.44	4819.7	5327.29	11173	21966.2	274.44	347.15	1073.25	6128.17	4511.3	3074.28
2009-09-02	19522	2285.92	1168.01	1613.16	10280.5	15467.5	2714.97	2569.93	10739	885.73	7039.77	9280.67	10701.3	55385.7	1967.07	1753.66	27953.3	6474.78	994.75	1684.72	289.05	2396.59	2290.72	3573.13	4817.55	5319.84	10999.7	21773.6	269.58	342.44	1056.85	6089.24	4436.6	3070.49
2009-09-03	19761.7	2322.25	1173.66	1613.53	10214.6	15398.3	2845.02	2598.36	11404	904.17	7104.65	9344.61	10921.5	55707.2	1983.2	1754.71	28150.1	6546.6	1003.24	1690.59	289.01	2427.49	2322.82	3553.51	4796.75	5301.42	11018.1	21936.6	271.65	345.32	1075.45	6073.72	4435.4	3093.22
2009-09-04	20318.6	2322.74	1178.74	1608.9	10187.1	15689.1	2861.61	2622.69	11519.7	904.17	7153.13	9441.27	11017.5	56652.3	2018.78	1779.25	28309.5	6637.13	1016.4	1719.69	293.16	2454.02	2356.17	3598.76	4851.7	5384.43	11222.7	22214.6	275.65	348.54	1064.12	6119.07	4444.3	3099.24
2009-09-06	20318.6	2322.74	1178.74	1608.9	10187.1	15689.1	2861.61	2622.69	11519.7	893.52	7153.13	9441.27	11017.5	56652.3	2018.78	1779.25	28309.5	6637.13	1016.4	1719.69	293.16	2454.02	2356.17	3598.76	4851.7	5384.43	11222.7	22214.6	275.65	348.54	1064.12	6119.07	4444.3	3099.24
2009-09-07	20629.3	2340.39	1190.39	1608.57	10320.9	16016.3	2881.12	2643.95	11635.5	897.74	7224.59	9441.27	11017.5	56652.3	2018.78	1809.2	28585.2	6637.13	1016.4	1719.69	298.41	2529.17	2398.1	3652.83	4933.18	5463.51	11388.6	22563.3	279.68	354.75	1092.46	6181.97	4461.1	3119.94
2009-09-08	21069.8	2371.3	1202.07	1619.69	10393.2	16123.7	2930.48	2660.91	11923.3	903.91	7313.99	9497.34	11105.3	57854.8	2037.77	1853.02	29190.8	6726.07	1025.39	1742.61	300.81	2510.24	2421.95	3660.96	4947.34	5481.73	11366.6	22542.9	280.51	356.87	1131.45	6194.72	4527.8	3121.31
2009-09-09	20851	2383.34	1196.46	1607.77	10312.1	16183.5	2946.26	2650.48	12047.2	904.76	7250.72	9547.22	11000.2	57909.9	2060.39	1874.33	29100	6772.4	1033.37	1750.62	304.25	2527.02	2446.64	3707.69	5004.3	5574.26	11462	22802	285.3	361.32	1155.64	6202.04	4526.5	3117.21
2009-09-10	21069.6	2411.86	1201.28	1644.68	10513.7	16216.9	2924.88	2682.02	11887	895.53	7332.08	9627.48	11155	58535.8	2084.02	1908.46	29318.4	6850.81	1044.14	1786.9	305.97	2521.26	2450.76	3705.87	4987.68	5594.77	11340.8	22849.9	284.06	360.24	1162.71	6208.43	4573.5	3126.14
2009-09-11	21161.4	2415.95	1208.28	1651.7	10444.3	16264.3	2989.79	2681.03	12096.3	895.53	7337.14	9605.41	11253.2	58366.4	2080.9	1900.18	29448.8	6843.82	1042.73	1791.26	308	2542.39	2458.72	3734.89	5011.47	5624.02	11452.6	23039.3	285.09	361.64	1196.83	6232.99	4596.2	3138.21
2009-09-14	20932.2	2382.7	1203.36	1634.91	10202.1	16214.2	3026.74	2639.74	12385.1	872.48	7256.95	9626.8	11332	58867.6	2091.78	1920.06	29383.2	6879.99	1049.34	1788.43	306.9	2527.48	2438.24	3730.61	5018.85	5620.24	11492.6	23029.3	284.02	358.38	1194.23	6225.64	4536.1	3129.51
2009-09-15	20866.4	2420.11	1207.47	1653.4	10217.6	16454.5	3033.73	2638.4	12438.2	883.09	7346.26	9683.41	11495.8	59263.9	2102.64	1930.63	29625	6917.07	1052.63	1805.13	308.37	2531.44	2469.83	3752.21	5042.13	5628.98	11593.3	23108.1	284.01	366.03	1222.14	6213.19	4546.3	3106.16
2009-09-16	21402.9	2439.36	1212.98	1683.33	10270.8	16677	2999.71	2674.42	12294.9	907.21	7440.24	9791.71	11555.6	60410.7	2133.15	1977.41	29625	7038.14	1068.76	1828.86	312.76	2582.59	2500.18	3813.79	5124.13	5700.26	11746.9	23465.5	286	371.74	1250.19	6299.91	4652.8	3118.33
2009-09-17	21768.5	2456.99	1218.8	1695.47	10443.8	16711.1	3060.26	2672.6	12473.6	909.4	7477.3	9783.92	11528.2	60236	2126.75	2017.57	30017.7	7002.17	1065.49	1814.75	313.88	2613.39	2504.2	3835.27	5163.95	5731.14	11771	23583	287.39	373.7	1244.85	6317.72	4714	3152.92
2009-09-18	21623.5	2456.99	1221.2	1699.71	10370.5	16741.3	2962.67	2647.91	11977.4	909.4	7526.55	9820.2	11446	60703	2132.86	2007.6	29942	7016.93	1068.3	1801.19	313.63	2588.8	2499.45	3827.84	5172.89	5703.83	11777.3	23484	286.04	373.42	1245.29	6325.15	4695.2	3155.7
2009-09-21	21472.8	2456.99	1221.2	1695.5	10370.5	16741.3	2967.01	2647.91	12045.2	904.26	7502.46	9778.86	11424.6	60928	2138.04	1986.34	29607.2	6968.59	1064.66	1786.27	311.34	2560.39	2492.26	3812.16	5134.36	5668.65	11727.4	23047.9	284.2	369.62	1209.13	6306.23	4681.5	3158.83
2009-09-22	21701.1	2456.99	1221.2	1718.88	10370.5	16886.4	2897.55	2685.63	11813.5	920.1	7469.03	9829.87	11585.7	61493.4	2146.3	2057.83	29513.7	7047.13	1071.66	1803.54	312.72	2595	2478.65	3823.52	5142.6	5709.38	11816.7	23066.9	287	376.01	1247.45	6340.72	4671.1	3137.26
2009-09-23	21595.5	2456.99	1219.07	1711.47	10370.5	16719.5	2842.72	2685.94	11462.3	923.48	7376.76	9748.55	11517.5	60496.2	2131.42	2023.36	28959.7	6964.69	1060.87	1799.35	313.36	2589.39	2491.19	3821.79	5139.37	5702.05	11853.3	23239	287.4	371.5	1266.24	6349.83	4741	3145.72
2009-09-24	21050.7	2468.9	1218.06	1693.88	10544.2	16781.4	2853.55	2667.43	11475.9	928.97	7324.22	9707.44	11289.1	60046.3	2107.61	2005.79	28465.1	6862.31	1050.78	1755.77	308.52	2548.31	2470.9	3758.36	5079.27	5605.21	11695.9	22953.4	281.24	365.17	1250.53	6275.44	4718.3	3134.39
2009-09-25	21024.4	2444.58	1217.39	1691.48	10266	16693	2838.84	2662.82	11384.2	928.97	7345.22	9665.19	11212.4	60355.7	2090.92	2015.83	28760	6823.51	1044.38	1744.61	305.63	2536.81	2462.44	3739.14	5082.2	5581.41	11643.8	23102.7	280.57	366.87	1232.77	6236.91	4720.6	3113.85
2009-09-28	20588.4	2397.83	1205.95	1675.55	10009.5	16693	2763.53	2627.98	11086.7	928.97	7284.61	9789.36	11338.7	61316.6	2130.74	2071.36	29402	6939.76	1062.98	1764.1	311.9	2586.67	2490.19	3825	5165.7	5736.31	11891.2	23478.4	284.45	370.3	1238.74	6289.27	4678.4	3131.18
2009-09-29	21013.2	2443.83	1208.21	1690.05	10100.2	16852.9	2754.54	2663.31	11069.3	947.42	7429.98	9742.2	11395	61235.3	2124.04	2065.67	29432	6926.82	1060.61	1770.08	312.12	2607.74	2490.78	3814.1	5159.72	5713.52	11853.7	23565.6	282.08	370.52	1256.34	6316.72	4747.2	3151.97
2009-09-30	20955.2	2467.59	1202.08	1673.14	10133.2	16852.9	2779.43	2672.57	11206.9	927.7	7509.17	9712.28	11395	61517.9	2122.42	2075.14	29232.2	6910.88	1057.08	1778.67	311.35	2637.28	2485.62	3795.41	5133.9	5675.16	11756.1	23472.7	280.4	370.83	1255.93	6323.18	4735.8	3162.26
2009-10-01	20955.2	2477.97	1208.35	1644.63	9978.64	17134.5	2779.43	2657.44	11206.9	939.87	7545.29	9509.28	11071.8	60459.3	2057.48	2022.79	28588.3	6718.05	1029.85	1741.39	305.74	2578.27	2451.37	3720.77	5047.81	5554.55	11518.2	23053.5	274.86	365.3	1268.38	6255.17	4700.2	3185.29
2009-10-02	20375.5	2479.85	1206.25	1644.63	9731.87	17134.5	2779.43	2604.53	11206.9	939.87	7411.88	9487.67	10958.3	61172	2048.11	2024.8	28678.7	6674.57	1025.21	1734.65	299.3	2486.61	2415.96	3649.9	4988.7	5467.9	11326.7	22652.9	271.27	357.56	1220.29	6150.17	4606.1	3152.85
2009-10-04	20375.5	2479.85	1206.25	1644.63	9731.87	17134.5	2779.43	2604.53	11206.9	931.46	7411.88	9487.67	10958.3	61172	2048.11	2024.8	28678.7	6674.57	1025.21	1734.65	299.3	2486.61	2415.96	3649.9	4988.7	5467.9	11326.7	22652.9	271.27	357.56	1220.29	6150.17	4606.1	3152.85
2009-10-05	20429.1	2480.41	1216.45	1606.9	9674.49	16866.4	2779.43	2583.73	11206.9	940.77	7437.98	9599.75	11102.6	62369.3	2068.15	2053.05	29214.4	6795.13	1040.46	1764.8	301.22	2501	2446	3675.01	5024.33	5508.85	11557	22830.8	273.51	366.28	1227.29	6162.9	4592.3	3138.33
2009-10-06	20811.5	2528.15	1212.73	1598.44	9691.8	16958.5	2779.43	2611.89	11206.9	955.34	7536.05	9731.25	11248	62670.6	2103.57	2101.34	29690.5	6899.68	1054.72	1780.81	309.28	2611.74	2526.87	3770.21	5137.98	5657.64	11817.1	23459.6	278.57	375.84	1270.54	6277.16	4597.2	3146.81
2009-10-07	21241.6	2513.41	1218.61	1598	9799.6	16806.7	2779.43	2634.63	11206.9	954.45	7608.66	9725.58	11349.9	62638.3	2110.33	2097.65	29763.4	6912.65	1057.58	1786.53	309.21	2605.33	2507.22	3756.41	5108.9	5640.75	11721.4	23414.3	276.98	373.05	1290.85	6260.15	4695.8	3138.66
2009-10-08	21492.9	2484.52	1230.09	1615.46	9832.47	16843.5	2779.43	2650.95	11206.9	959.6	7503.31	9786.87	11484.5	63759.9	2123.93	2149.09	29898.8	6990.67	1065.48	1818.59	314.76	2656.71	2542.28	3806.81	5154.64	5716.54	11814.3	23663.7	280.03	381.44	1330.43	6305.8	4763.3	3164.82
2009-10-09	21499.4	2474.4	1233.82	1646.79	10016.4	16642.7	2911.72	2652.51	11801.2	959.6	7571.96	9864.94	11436.9	64071	2139.28	2169.04	30039.7	7015.54	1071.49	1810.64	315.55	2673.96	2547.01	3799.61	5161.87	5711.88	11743.2	23770.6	281.16	383.93	1373.47	6291.64	4759.8	3164.16
2009-10-11	21499.4	2474.4	1233.82	1646.79	10016.4	16642.7	2911.72	2652.51	11801.2	959.56	7571.96	9864.94	11436.9	64071	2139.28	2169.04	30039.7	7015.54	1071.49	1810.64	315.55	2673.96	2547.01	3799.61	5161.87	5711.88	11743.2	23770.6	281.16	383.93	1373.47	6291.64	4759.8	3164.16
2009-10-12	21299.3	2456.69	1233.33	1639.81	10016.4	17026.7	2894.48	2680.47	11743.9	965.13	7571.96	9885.8	11436.9	64071	2139.14	2169.04	30475.4	7051.16	1076.19	1813.97	320.71	2700.38	2559.26	3845.8	5210.17	5783.23	11748.8	24141	284.58	385.58	1426.5	6377.78	4750.1	3174.2
2009-10-13	21467.4	2471.99	1233.51	1628.93	10076.6	17026.7	2936.19	2668.4	11874.9	967.9	7596.6	9871.06	11413.5	64645.6	2139.89	2193.92	30611.1	7031.87	1073.19	1821.65	319.53	2687.32	2532.02	3801.39	5154.15	5714.31	11608.3	23928.8	282.62	382.89	1399.55	6321.26	4789.8	3174.35
2009-10-14	21886.5	2511.72	1246.84	1649.09	10060.2	17231.1	2970.53	2708.48	11975.9	972.74	7695.75	10015.9	11532.8	66201.1	2172.23	2224.27	30881.1	7182.38	1092.02	1848.93	325.47	2729.26	2584.29	3882.67	5256.1	5854.14	11870.9	24348.2	289.63	391.22	1445.05	6405.92	4834	3184.69
2009-10-15	21999.1	2515.38	1246.86	1658.99	10238.6	17195.2	2979.79	2712.15	12010.2	971.56	7710.4	10062.9	11504.5	66703.3	2173.29	2224.98	31017.7	7204.05	1096.56	1860.21	325.19	2738	2584.39	3883.83	5222.95	5830.77	11849.7	24339.8	289.26	389.92	1433.36	6383.19	4859.1	3191.87
2009-10-16	21929.9	2515.81	1256.77	1640.36	10257.6	17322.8	2976.63	2708.12	12033.4	971.56	7715.1	9995.91	11504.8	66200.5	2156.8	2207.28	30726.3	7133.96	1087.68	1860.61	322.31	2725.23	2578.14	3827.6	5190.24	5743.39	11676.4	24152.3	289.7	390.37	1406.85	6345.26	4846.2	3209.71
2009-10-18	21929.9	2515.81	1256.77	1640.36	10257.6	17322.8	2976.63	2708.12	12033.4	969.89	7715.1	9995.91	11504.8	66200.5	2156.8	2207.28	30726.3	7133.96	1087.68	1860.61	322.31	2725.23	2578.14	3827.6	5190.24	5743.39	11676.4	24152.3	289.7	390.37	1406.85	6345.26	4846.2	3209.71
2009-10-19	22200.5	2520.92	1261.49	1649.07	10236.5	17322.8	3038.27	2711.7	12483.3	977.95	7751.32	10092.2	11538.4	67239.4	2176.32	2253.84	30927.1	7222.21	1097.91	1878.84	327.03	2739.88	2606.93	3892.36	5281.54	5852.56	11885.3	24426	293.84	397.55	1428.52	6436.37	4802.7	3215.75
[truncated: 2,042 more rows]
